# Supplementary material for: Role of circulating polyunsaturated fatty acids on cardiovascular diseases risk: analysis using Mendelian randomization and fatty acid genetic association data from over 114,000 UK Biobank participants
Source: BMC Med. 2022 Jun 13;20:210. doi: 10.1186/s12916-022-02399-w (PMC9190170; doi:10.1186/s12916-022-02399-w)
Supplement: Supplementary file 1 — Additional file 1: Supplementary Tables S1–S11. [file 12916_2022_2399_MOESM1_ESM.xlsx]

## Sheet: ST1
Abbreviation	Biomarker name	Unit	Group	Subgroup	Derived measure
Acetate	Acetate	mmol/l	Ketone bodies		No
Acetoacetate	Acetoacetate	mmol/l	Ketone bodies		No
Acetone	Acetone	mmol/l	Ketone bodies		No
Ala	Alanine	mmol/l	Amino acids		No
Albumin	Albumin	g/l	Fluid balance		No
ApoA1	Apolipoprotein A1	g/l	Apolipoproteins		No
ApoB	Apolipoprotein B	g/l	Apolipoproteins		No
bOHbutyrate	3-Hydroxybutyrate	mmol/l	Ketone bodies		No
Cholines	Total cholines	mmol/l	Other lipids		No
Citrate	Citrate	mmol/l	Glycolysis related metabolites		No
Clinical_LDL_C	Clinical LDL cholesterol	mmol/l	Cholesterol		No
Creatinine	Creatinine	mmol/l	Fluid balance		No
DHA	Docosahexaenoic acid	mmol/l	Fatty acids		No
Gln	Glutamine	mmol/l	Amino acids		No
Glucose	Glucose	mmol/l	Glycolysis related metabolites		No
Gly	Glycine	mmol/l	Amino acids		No
GlycA	Glycoprotein acetyls	mmol/l	Inflammation		No
HDL_C	HDL cholesterol	mmol/l	Cholesterol		No
HDL_CE	Cholesteryl esters in HDL	mmol/l	Cholesteryl esters		No
HDL_FC	Free cholesterol in HDL	mmol/l	Free cholesterol		No
HDL_L	Total lipids in HDL	mmol/l	Total lipids		No
HDL_P	Concentration of HDL particles	mmol/l	Lipoprotein particle concentrations		No
HDL_PL	Phospholipids in HDL	mmol/l	Phospholipids		No
HDL_size	Average diameter for HDL particles	nm	Lipoprotein particle sizes		No
HDL_TG	Triglycerides in HDL	mmol/l	Triglycerides		No
His	Histidine	mmol/l	Amino acids		No
IDL_C	Cholesterol in IDL	mmol/l	Lipoprotein subclasses	IDL (average diameter 28.6 nm)	No
IDL_CE	Cholesteryl esters in IDL	mmol/l	Lipoprotein subclasses	IDL (average diameter 28.6 nm)	No
IDL_FC	Free cholesterol in IDL	mmol/l	Lipoprotein subclasses	IDL (average diameter 28.6 nm)	No
IDL_L	Total lipids in IDL	mmol/l	Lipoprotein subclasses	IDL (average diameter 28.6 nm)	No
IDL_P	Concentration of IDL particles	mmol/l	Lipoprotein subclasses	IDL (average diameter 28.6 nm)	No
IDL_PL	Phospholipids in IDL	mmol/l	Lipoprotein subclasses	IDL (average diameter 28.6 nm)	No
IDL_TG	Triglycerides in IDL	mmol/l	Lipoprotein subclasses	IDL (average diameter 28.6 nm)	No
Ile	Isoleucine	mmol/l	Amino acids	Branched-chain amino acids	No
L_HDL_C	Cholesterol in large HDL	mmol/l	Lipoprotein subclasses	Large HDL (average diameter 12.1 nm)	No
L_HDL_CE	Cholesteryl esters in large HDL	mmol/l	Lipoprotein subclasses	Large HDL (average diameter 12.1 nm)	No
L_HDL_FC	Free cholesterol in large HDL	mmol/l	Lipoprotein subclasses	Large HDL (average diameter 12.1 nm)	No
L_HDL_L	Total lipids in large HDL	mmol/l	Lipoprotein subclasses	Large HDL (average diameter 12.1 nm)	No
L_HDL_P	Concentration of large HDL particles	mmol/l	Lipoprotein subclasses	Large HDL (average diameter 12.1 nm)	No
L_HDL_PL	Phospholipids in large HDL	mmol/l	Lipoprotein subclasses	Large HDL (average diameter 12.1 nm)	No
L_HDL_TG	Triglycerides in large HDL	mmol/l	Lipoprotein subclasses	Large HDL (average diameter 12.1 nm)	No
L_LDL_C	Cholesterol in large LDL	mmol/l	Lipoprotein subclasses	Large LDL (average diameter 25.5 nm)	No
L_LDL_CE	Cholesteryl esters in large LDL	mmol/l	Lipoprotein subclasses	Large LDL (average diameter 25.5 nm)	No
L_LDL_FC	Free cholesterol in large LDL	mmol/l	Lipoprotein subclasses	Large LDL (average diameter 25.5 nm)	No
L_LDL_L	Total lipids in large LDL	mmol/l	Lipoprotein subclasses	Large LDL (average diameter 25.5 nm)	No
L_LDL_P	Concentration of large LDL particles	mmol/l	Lipoprotein subclasses	Large LDL (average diameter 25.5 nm)	No
L_LDL_PL	Phospholipids in large LDL	mmol/l	Lipoprotein subclasses	Large LDL (average diameter 25.5 nm)	No
L_LDL_TG	Triglycerides in large LDL	mmol/l	Lipoprotein subclasses	Large LDL (average diameter 25.5 nm)	No
L_VLDL_C	Cholesterol in large VLDL	mmol/l	Lipoprotein subclasses	Large VLDL (average diameter 53.6 nm)	No
L_VLDL_CE	Cholesteryl esters in large VLDL	mmol/l	Lipoprotein subclasses	Large VLDL (average diameter 53.6 nm)	No
L_VLDL_FC	Free cholesterol in large VLDL	mmol/l	Lipoprotein subclasses	Large VLDL (average diameter 53.6 nm)	No
L_VLDL_L	Total lipids in large VLDL	mmol/l	Lipoprotein subclasses	Large VLDL (average diameter 53.6 nm)	No
L_VLDL_P	Concentration of large VLDL particles	mmol/l	Lipoprotein subclasses	Large VLDL (average diameter 53.6 nm)	No
L_VLDL_PL	Phospholipids in large VLDL	mmol/l	Lipoprotein subclasses	Large VLDL (average diameter 53.6 nm)	No
L_VLDL_TG	Triglycerides in large VLDL	mmol/l	Lipoprotein subclasses	Large VLDL (average diameter 53.6 nm)	No
LA	Linoleic acid	mmol/l	Fatty acids		No
Lactate	Lactate	mmol/l	Glycolysis related metabolites		No
LDL_C	LDL cholesterol	mmol/l	Cholesterol		No
LDL_CE	Cholesteryl esters in LDL	mmol/l	Cholesteryl esters		No
LDL_FC	Free cholesterol in LDL	mmol/l	Free cholesterol		No
LDL_L	Total lipids in LDL	mmol/l	Total lipids		No
LDL_P	Concentration of LDL particles	mmol/l	Lipoprotein particle concentrations		No
LDL_PL	Phospholipids in LDL	mmol/l	Phospholipids		No
LDL_size	Average diameter for LDL particles	nm	Lipoprotein particle sizes		No
LDL_TG	Triglycerides in LDL	mmol/l	Triglycerides		No
Leu	Leucine	mmol/l	Amino acids	Branched-chain amino acids	No
M_HDL_C	Cholesterol in medium HDL	mmol/l	Lipoprotein subclasses	Medium HDL (average diameter 10.9 nm)	No
M_HDL_CE	Cholesteryl esters in medium HDL	mmol/l	Lipoprotein subclasses	Medium HDL (average diameter 10.9 nm)	No
M_HDL_FC	Free cholesterol in medium HDL	mmol/l	Lipoprotein subclasses	Medium HDL (average diameter 10.9 nm)	No
M_HDL_L	Total lipids in medium HDL	mmol/l	Lipoprotein subclasses	Medium HDL (average diameter 10.9 nm)	No
M_HDL_P	Concentration of medium HDL particles	mmol/l	Lipoprotein subclasses	Medium HDL (average diameter 10.9 nm)	No
M_HDL_PL	Phospholipids in medium HDL	mmol/l	Lipoprotein subclasses	Medium HDL (average diameter 10.9 nm)	No
M_HDL_TG	Triglycerides in medium HDL	mmol/l	Lipoprotein subclasses	Medium HDL (average diameter 10.9 nm)	No
M_LDL_C	Cholesterol in medium LDL	mmol/l	Lipoprotein subclasses	Medium LDL (average diameter 23 nm)	No
M_LDL_CE	Cholesteryl esters in medium LDL	mmol/l	Lipoprotein subclasses	Medium LDL (average diameter 23 nm)	No
M_LDL_FC	Free cholesterol in medium LDL	mmol/l	Lipoprotein subclasses	Medium LDL (average diameter 23 nm)	No
M_LDL_L	Total lipids in medium LDL	mmol/l	Lipoprotein subclasses	Medium LDL (average diameter 23 nm)	No
M_LDL_P	Concentration of medium LDL particles	mmol/l	Lipoprotein subclasses	Medium LDL (average diameter 23 nm)	No
M_LDL_PL	Phospholipids in medium LDL	mmol/l	Lipoprotein subclasses	Medium LDL (average diameter 23 nm)	No
M_LDL_TG	Triglycerides in medium LDL	mmol/l	Lipoprotein subclasses	Medium LDL (average diameter 23 nm)	No
M_VLDL_C	Cholesterol in medium VLDL	mmol/l	Lipoprotein subclasses	Medium VLDL (average diameter 44.5 nm)	No
M_VLDL_CE	Cholesteryl esters in medium VLDL	mmol/l	Lipoprotein subclasses	Medium VLDL (average diameter 44.5 nm)	No
M_VLDL_FC	Free cholesterol in medium VLDL	mmol/l	Lipoprotein subclasses	Medium VLDL (average diameter 44.5 nm)	No
M_VLDL_L	Total lipids in medium VLDL	mmol/l	Lipoprotein subclasses	Medium VLDL (average diameter 44.5 nm)	No
M_VLDL_P	Concentration of medium VLDL particles	mmol/l	Lipoprotein subclasses	Medium VLDL (average diameter 44.5 nm)	No
M_VLDL_PL	Phospholipids in medium VLDL	mmol/l	Lipoprotein subclasses	Medium VLDL (average diameter 44.5 nm)	No
M_VLDL_TG	Triglycerides in medium VLDL	mmol/l	Lipoprotein subclasses	Medium VLDL (average diameter 44.5 nm)	No
MUFA	Monounsaturated fatty acids	mmol/l	Fatty acids		No
Omega_3	Omega-3 fatty acids	mmol/l	Fatty acids		No
Omega_6	Omega-6 fatty acids	mmol/l	Fatty acids		No
Phe	Phenylalanine	mmol/l	Amino acids	Aromatic amino acids	No
Phosphatidylc	Phosphatidylcholines	mmol/l	Other lipids		No
Phosphoglyc	Phosphoglycerides	mmol/l	Other lipids		No
PUFA	Polyunsaturated fatty acids	mmol/l	Fatty acids		No
Pyruvate	Pyruvate	mmol/l	Glycolysis related metabolites		No
S_HDL_C	Cholesterol in small HDL	mmol/l	Lipoprotein subclasses	Small HDL (average diameter 8.7 nm)	No
S_HDL_CE	Cholesteryl esters in small HDL	mmol/l	Lipoprotein subclasses	Small HDL (average diameter 8.7 nm)	No
S_HDL_FC	Free cholesterol in small HDL	mmol/l	Lipoprotein subclasses	Small HDL (average diameter 8.7 nm)	No
S_HDL_L	Total lipids in small HDL	mmol/l	Lipoprotein subclasses	Small HDL (average diameter 8.7 nm)	No
S_HDL_P	Concentration of small HDL particles	mmol/l	Lipoprotein subclasses	Small HDL (average diameter 8.7 nm)	No
S_HDL_PL	Phospholipids in small HDL	mmol/l	Lipoprotein subclasses	Small HDL (average diameter 8.7 nm)	No
S_HDL_TG	Triglycerides in small HDL	mmol/l	Lipoprotein subclasses	Small HDL (average diameter 8.7 nm)	No
S_LDL_C	Cholesterol in small LDL	mmol/l	Lipoprotein subclasses	Small LDL (average diameter 18.7 nm)	No
S_LDL_CE	Cholesteryl esters in small LDL	mmol/l	Lipoprotein subclasses	Small LDL (average diameter 18.7 nm)	No
S_LDL_FC	Free cholesterol in small LDL	mmol/l	Lipoprotein subclasses	Small LDL (average diameter 18.7 nm)	No
S_LDL_L	Total lipids in small LDL	mmol/l	Lipoprotein subclasses	Small LDL (average diameter 18.7 nm)	No
S_LDL_P	Concentration of small LDL particles	mmol/l	Lipoprotein subclasses	Small LDL (average diameter 18.7 nm)	No
S_LDL_PL	Phospholipids in small LDL	mmol/l	Lipoprotein subclasses	Small LDL (average diameter 18.7 nm)	No
S_LDL_TG	Triglycerides in small LDL	mmol/l	Lipoprotein subclasses	Small LDL (average diameter 18.7 nm)	No
S_VLDL_C	Cholesterol in small VLDL	mmol/l	Lipoprotein subclasses	Small VLDL (average diameter 36.8 nm)	No
S_VLDL_CE	Cholesteryl esters in small VLDL	mmol/l	Lipoprotein subclasses	Small VLDL (average diameter 36.8 nm)	No
S_VLDL_FC	Free cholesterol in small VLDL	mmol/l	Lipoprotein subclasses	Small VLDL (average diameter 36.8 nm)	No
S_VLDL_L	Total lipids in small VLDL	mmol/l	Lipoprotein subclasses	Small VLDL (average diameter 36.8 nm)	No
S_VLDL_P	Concentration of small VLDL particles	mmol/l	Lipoprotein subclasses	Small VLDL (average diameter 36.8 nm)	No
S_VLDL_PL	Phospholipids in small VLDL	mmol/l	Lipoprotein subclasses	Small VLDL (average diameter 36.8 nm)	No
S_VLDL_TG	Triglycerides in small VLDL	mmol/l	Lipoprotein subclasses	Small VLDL (average diameter 36.8 nm)	No
SFA	Saturated fatty acids	mmol/l	Fatty acids		No
Sphingomyelins	Sphingomyelins	mmol/l	Other lipids		No
Total_C	Total cholesterol	mmol/l	Cholesterol		No
Total_CE	Total esterified cholesterol	mmol/l	Cholesteryl esters		No
Total_FA	Total fatty acids	mmol/l	Fatty acids		No
Total_FC	Total free cholesterol	mmol/l	Free cholesterol		No
Total_L	Total lipids in lipoprotein particles	mmol/l	Total lipids		No
Total_P	Total concentration of lipoprotein particles	mmol/l	Lipoprotein particle concentrations		No
Total_PL	Total phospholipids in lipoprotein particles	mmol/l	Phospholipids		No
Total_TG	Total triglycerides	mmol/l	Triglycerides		No
Tyr	Tyrosine	mmol/l	Amino acids	Aromatic amino acids	No
Unsaturation	Degree of unsaturation	degree	Fatty acids		No
Val	Valine	mmol/l	Amino acids	Branched-chain amino acids	No
VLDL_C	VLDL cholesterol	mmol/l	Cholesterol		No
VLDL_CE	Cholesteryl esters in VLDL	mmol/l	Cholesteryl esters		No
VLDL_FC	Free cholesterol in VLDL	mmol/l	Free cholesterol		No
VLDL_L	Total lipids in VLDL	mmol/l	Total lipids		No
VLDL_P	Concentration of VLDL particles	mmol/l	Lipoprotein particle concentrations		No
VLDL_PL	Phospholipids in VLDL	mmol/l	Phospholipids		No
VLDL_size	Average diameter for VLDL particles	nm	Lipoprotein particle sizes		No
VLDL_TG	Triglycerides in VLDL	mmol/l	Triglycerides		No
XL_HDL_C	Cholesterol in very large HDL	mmol/l	Lipoprotein subclasses	Very large HDL (average diameter 14.3 nm)	No
XL_HDL_CE	Cholesteryl esters in very large HDL	mmol/l	Lipoprotein subclasses	Very large HDL (average diameter 14.3 nm)	No
XL_HDL_FC	Free cholesterol in very large HDL	mmol/l	Lipoprotein subclasses	Very large HDL (average diameter 14.3 nm)	No
XL_HDL_L	Total lipids in very large HDL	mmol/l	Lipoprotein subclasses	Very large HDL (average diameter 14.3 nm)	No
XL_HDL_P	Concentration of very large HDL particles	mmol/l	Lipoprotein subclasses	Very large HDL (average diameter 14.3 nm)	No
XL_HDL_PL	Phospholipids in very large HDL	mmol/l	Lipoprotein subclasses	Very large HDL (average diameter 14.3 nm)	No
XL_HDL_TG	Triglycerides in very large HDL	mmol/l	Lipoprotein subclasses	Very large HDL (average diameter 14.3 nm)	No
XL_VLDL_C	Cholesterol in very large VLDL	mmol/l	Lipoprotein subclasses	Very large VLDL (average diameter 64 nm)	No
XL_VLDL_CE	Cholesteryl esters in very large VLDL	mmol/l	Lipoprotein subclasses	Very large VLDL (average diameter 64 nm)	No
XL_VLDL_FC	Free cholesterol in very large VLDL	mmol/l	Lipoprotein subclasses	Very large VLDL (average diameter 64 nm)	No
XL_VLDL_L	Total lipids in very large VLDL	mmol/l	Lipoprotein subclasses	Very large VLDL (average diameter 64 nm)	No
XL_VLDL_P	Concentration of very large VLDL particles	mmol/l	Lipoprotein subclasses	Very large VLDL (average diameter 64 nm)	No
XL_VLDL_PL	Phospholipids in very large VLDL	mmol/l	Lipoprotein subclasses	Very large VLDL (average diameter 64 nm)	No
XL_VLDL_TG	Triglycerides in very large VLDL	mmol/l	Lipoprotein subclasses	Very large VLDL (average diameter 64 nm)	No
XS_VLDL_C	Cholesterol in very small VLDL	mmol/l	Lipoprotein subclasses	Very small VLDL (average diameter 31.3 nm)	No
XS_VLDL_CE	Cholesteryl esters in very small VLDL	mmol/l	Lipoprotein subclasses	Very small VLDL (average diameter 31.3 nm)	No
XS_VLDL_FC	Free cholesterol in very small VLDL	mmol/l	Lipoprotein subclasses	Very small VLDL (average diameter 31.3 nm)	No
XS_VLDL_L	Total lipids in very small VLDL	mmol/l	Lipoprotein subclasses	Very small VLDL (average diameter 31.3 nm)	No
XS_VLDL_P	Concentration of very small VLDL particles	mmol/l	Lipoprotein subclasses	Very small VLDL (average diameter 31.3 nm)	No
XS_VLDL_PL	Phospholipids in very small VLDL	mmol/l	Lipoprotein subclasses	Very small VLDL (average diameter 31.3 nm)	No
XS_VLDL_TG	Triglycerides in very small VLDL	mmol/l	Lipoprotein subclasses	Very small VLDL (average diameter 31.3 nm)	No
XXL_VLDL_C	Cholesterol in chylomicrons and extremely large VLDL	mmol/l	Lipoprotein subclasses	Chylomicrons and extremely large VLDL (particle diameters from 75 nm upwards)	No
XXL_VLDL_CE	Cholesteryl esters in chylomicrons and extremely large VLDL	mmol/l	Lipoprotein subclasses	Chylomicrons and extremely large VLDL (particle diameters from 75 nm upwards)	No
XXL_VLDL_FC	Free cholesterol in chylomicrons and extremely large VLDL	mmol/l	Lipoprotein subclasses	Chylomicrons and extremely large VLDL (particle diameters from 75 nm upwards)	No
XXL_VLDL_L	Total lipids in chylomicrons and extremely large VLDL	mmol/l	Lipoprotein subclasses	Chylomicrons and extremely large VLDL (particle diameters from 75 nm upwards)	No
XXL_VLDL_P	Concentration of chylomicrons and extremely large VLDL particles	mmol/l	Lipoprotein subclasses	Chylomicrons and extremely large VLDL (particle diameters from 75 nm upwards)	No
XXL_VLDL_PL	Phospholipids in chylomicrons and extremely large VLDL	mmol/l	Lipoprotein subclasses	Chylomicrons and extremely large VLDL (particle diameters from 75 nm upwards)	No
XXL_VLDL_TG	Triglycerides in chylomicrons and extremely large VLDL	mmol/l	Lipoprotein subclasses	Chylomicrons and extremely large VLDL (particle diameters from 75 nm upwards)	No
ApoB_by_ApoA1	Ratio of apolipoprotein B to apolipoprotein A1	ratio	Apolipoproteins		Yes
DHA_pct	Ratio of docosahexaenoic acid to total fatty acids	%	Fatty acids	Fatty acid ratios	Yes
IDL_C_pct	Cholesterol to total lipids ratio in IDL	%	Relative lipoprotein lipid concentrations	IDL ratios	Yes
IDL_CE_pct	Cholesteryl esters to total lipids ratio in IDL	%	Relative lipoprotein lipid concentrations	IDL ratios	Yes
IDL_FC_pct	Free cholesterol to total lipids ratio in IDL	%	Relative lipoprotein lipid concentrations	IDL ratios	Yes
IDL_PL_pct	Phospholipids to total lipids ratio in IDL	%	Relative lipoprotein lipid concentrations	IDL ratios	Yes
IDL_TG_pct	Triglycerides to total lipids ratio in IDL	%	Relative lipoprotein lipid concentrations	IDL ratios	Yes
L_HDL_C_pct	Cholesterol to total lipids ratio in large HDL	%	Relative lipoprotein lipid concentrations	Large HDL ratios	Yes
L_HDL_CE_pct	Cholesteryl esters to total lipids ratio in large HDL	%	Relative lipoprotein lipid concentrations	Large HDL ratios	Yes
L_HDL_FC_pct	Free cholesterol to total lipids ratio in large HDL	%	Relative lipoprotein lipid concentrations	Large HDL ratios	Yes
L_HDL_PL_pct	Phospholipids to total lipids ratio in large HDL	%	Relative lipoprotein lipid concentrations	Large HDL ratios	Yes
L_HDL_TG_pct	Triglycerides to total lipids ratio in large HDL	%	Relative lipoprotein lipid concentrations	Large HDL ratios	Yes
L_LDL_C_pct	Cholesterol to total lipids ratio in large LDL	%	Relative lipoprotein lipid concentrations	Large LDL ratios	Yes
L_LDL_CE_pct	Cholesteryl esters to total lipids ratio in large LDL	%	Relative lipoprotein lipid concentrations	Large LDL ratios	Yes
L_LDL_FC_pct	Free cholesterol to total lipids ratio in large LDL	%	Relative lipoprotein lipid concentrations	Large LDL ratios	Yes
L_LDL_PL_pct	Phospholipids to total lipids ratio in large LDL	%	Relative lipoprotein lipid concentrations	Large LDL ratios	Yes
L_LDL_TG_pct	Triglycerides to total lipids ratio in large LDL	%	Relative lipoprotein lipid concentrations	Large LDL ratios	Yes
L_VLDL_C_pct	Cholesterol to total lipids ratio in large VLDL	%	Relative lipoprotein lipid concentrations	Large VLDL ratios	Yes
L_VLDL_CE_pct	Cholesteryl esters to total lipids ratio in large VLDL	%	Relative lipoprotein lipid concentrations	Large VLDL ratios	Yes
L_VLDL_FC_pct	Free cholesterol to total lipids ratio in large VLDL	%	Relative lipoprotein lipid concentrations	Large VLDL ratios	Yes
L_VLDL_PL_pct	Phospholipids to total lipids ratio in large VLDL	%	Relative lipoprotein lipid concentrations	Large VLDL ratios	Yes
L_VLDL_TG_pct	Triglycerides to total lipids ratio in large VLDL	%	Relative lipoprotein lipid concentrations	Large VLDL ratios	Yes
LA_pct	Ratio of linoleic acid to total fatty acids	%	Fatty acids	Fatty acid ratios	Yes
M_HDL_C_pct	Cholesterol to total lipids ratio in medium HDL	%	Relative lipoprotein lipid concentrations	Medium HDL ratios	Yes
M_HDL_CE_pct	Cholesteryl esters to total lipids ratio in medium HDL	%	Relative lipoprotein lipid concentrations	Medium HDL ratios	Yes
M_HDL_FC_pct	Free cholesterol to total lipids ratio in medium HDL	%	Relative lipoprotein lipid concentrations	Medium HDL ratios	Yes
M_HDL_PL_pct	Phospholipids to total lipids ratio in medium HDL	%	Relative lipoprotein lipid concentrations	Medium HDL ratios	Yes
M_HDL_TG_pct	Triglycerides to total lipids ratio in medium HDL	%	Relative lipoprotein lipid concentrations	Medium HDL ratios	Yes
M_LDL_C_pct	Cholesterol to total lipids ratio in medium LDL	%	Relative lipoprotein lipid concentrations	Medium LDL ratios	Yes
M_LDL_CE_pct	Cholesteryl esters to total lipids ratio in medium LDL	%	Relative lipoprotein lipid concentrations	Medium LDL ratios	Yes
M_LDL_FC_pct	Free cholesterol to total lipids ratio in medium LDL	%	Relative lipoprotein lipid concentrations	Medium LDL ratios	Yes
M_LDL_PL_pct	Phospholipids to total lipids ratio in medium LDL	%	Relative lipoprotein lipid concentrations	Medium LDL ratios	Yes
M_LDL_TG_pct	Triglycerides to total lipids ratio in medium LDL	%	Relative lipoprotein lipid concentrations	Medium LDL ratios	Yes
M_VLDL_C_pct	Cholesterol to total lipids ratio in medium VLDL	%	Relative lipoprotein lipid concentrations	Medium VLDL ratios	Yes
M_VLDL_CE_pct	Cholesteryl esters to total lipids ratio in medium VLDL	%	Relative lipoprotein lipid concentrations	Medium VLDL ratios	Yes
M_VLDL_FC_pct	Free cholesterol to total lipids ratio in medium VLDL	%	Relative lipoprotein lipid concentrations	Medium VLDL ratios	Yes
M_VLDL_PL_pct	Phospholipids to total lipids ratio in medium VLDL	%	Relative lipoprotein lipid concentrations	Medium VLDL ratios	Yes
M_VLDL_TG_pct	Triglycerides to total lipids ratio in medium VLDL	%	Relative lipoprotein lipid concentrations	Medium VLDL ratios	Yes
MUFA_pct	Ratio of monounsaturated fatty acids to total fatty acids	%	Fatty acids	Fatty acid ratios	Yes
non_HDL_C	Total cholesterol minus HDL-C	mmol/l	Cholesterol		Yes
Omega_3_pct	Ratio of omega-3 fatty acids to total fatty acids	%	Fatty acids	Fatty acid ratios	Yes
Omega_6_by_Omega_3	Ratio of omega-6 fatty acids to omega-3 fatty acids	ratio	Fatty acids	Fatty acid ratios	Yes
Omega_6_pct	Ratio of omega-6 fatty acids to total fatty acids	%	Fatty acids	Fatty acid ratios	Yes
PUFA_by_MUFA	Ratio of polyunsaturated fatty acids to monounsaturated fatty acids	ratio	Fatty acids	Fatty acid ratios	Yes
PUFA_pct	Ratio of polyunsaturated fatty acids to total fatty acids	%	Fatty acids	Fatty acid ratios	Yes
Remnant_C	Remnant cholesterol (non-HDL, non-LDL -cholesterol)	mmol/l	Cholesterol		Yes
S_HDL_C_pct	Cholesterol to total lipids ratio in small HDL	%	Relative lipoprotein lipid concentrations	Small HDL ratios	Yes
S_HDL_CE_pct	Cholesteryl esters to total lipids ratio in small HDL	%	Relative lipoprotein lipid concentrations	Small HDL ratios	Yes
S_HDL_FC_pct	Free cholesterol to total lipids ratio in small HDL	%	Relative lipoprotein lipid concentrations	Small HDL ratios	Yes
S_HDL_PL_pct	Phospholipids to total lipids ratio in small HDL	%	Relative lipoprotein lipid concentrations	Small HDL ratios	Yes
S_HDL_TG_pct	Triglycerides to total lipids ratio in small HDL	%	Relative lipoprotein lipid concentrations	Small HDL ratios	Yes
S_LDL_C_pct	Cholesterol to total lipids ratio in small LDL	%	Relative lipoprotein lipid concentrations	Small LDL ratios	Yes
S_LDL_CE_pct	Cholesteryl esters to total lipids ratio in small LDL	%	Relative lipoprotein lipid concentrations	Small LDL ratios	Yes
S_LDL_FC_pct	Free cholesterol to total lipids ratio in small LDL	%	Relative lipoprotein lipid concentrations	Small LDL ratios	Yes
S_LDL_PL_pct	Phospholipids to total lipids ratio in small LDL	%	Relative lipoprotein lipid concentrations	Small LDL ratios	Yes
S_LDL_TG_pct	Triglycerides to total lipids ratio in small LDL	%	Relative lipoprotein lipid concentrations	Small LDL ratios	Yes
S_VLDL_C_pct	Cholesterol to total lipids ratio in small VLDL	%	Relative lipoprotein lipid concentrations	Small VLDL ratios	Yes
S_VLDL_CE_pct	Cholesteryl esters to total lipids ratio in small VLDL	%	Relative lipoprotein lipid concentrations	Small VLDL ratios	Yes
S_VLDL_FC_pct	Free cholesterol to total lipids ratio in small VLDL	%	Relative lipoprotein lipid concentrations	Small VLDL ratios	Yes
S_VLDL_PL_pct	Phospholipids to total lipids ratio in small VLDL	%	Relative lipoprotein lipid concentrations	Small VLDL ratios	Yes
S_VLDL_TG_pct	Triglycerides to total lipids ratio in small VLDL	%	Relative lipoprotein lipid concentrations	Small VLDL ratios	Yes
SFA_pct	Ratio of saturated fatty acids to total fatty acids	%	Fatty acids	Fatty acid ratios	Yes
TG_by_PG	Ratio of triglycerides to phosphoglycerides	ratio	Other lipids		Yes
Total_BCAA	Total concentration of branched-chain amino acids (leucine + isoleucine + valine)	mmol/l	Amino acids	Branched-chain amino acids	Yes
XL_HDL_C_pct	Cholesterol to total lipids ratio in very large HDL	%	Relative lipoprotein lipid concentrations	Very large HDL ratios	Yes
XL_HDL_CE_pct	Cholesteryl esters to total lipids ratio in very large HDL	%	Relative lipoprotein lipid concentrations	Very large HDL ratios	Yes
XL_HDL_FC_pct	Free cholesterol to total lipids ratio in very large HDL	%	Relative lipoprotein lipid concentrations	Very large HDL ratios	Yes
XL_HDL_PL_pct	Phospholipids to total lipids ratio in very large HDL	%	Relative lipoprotein lipid concentrations	Very large HDL ratios	Yes
XL_HDL_TG_pct	Triglycerides to total lipids ratio in very large HDL	%	Relative lipoprotein lipid concentrations	Very large HDL ratios	Yes
XL_VLDL_C_pct	Cholesterol to total lipids ratio in very large VLDL	%	Relative lipoprotein lipid concentrations	Very large VLDL ratios	Yes
XL_VLDL_CE_pct	Cholesteryl esters to total lipids ratio in very large VLDL	%	Relative lipoprotein lipid concentrations	Very large VLDL ratios	Yes
XL_VLDL_FC_pct	Free cholesterol to total lipids ratio in very large VLDL	%	Relative lipoprotein lipid concentrations	Very large VLDL ratios	Yes
XL_VLDL_PL_pct	Phospholipids to total lipids ratio in very large VLDL	%	Relative lipoprotein lipid concentrations	Very large VLDL ratios	Yes
XL_VLDL_TG_pct	Triglycerides to total lipids ratio in very large VLDL	%	Relative lipoprotein lipid concentrations	Very large VLDL ratios	Yes
XS_VLDL_C_pct	Cholesterol to total lipids ratio in very small VLDL	%	Relative lipoprotein lipid concentrations	Very small VLDL ratios	Yes
XS_VLDL_CE_pct	Cholesteryl esters to total lipids ratio in very small VLDL	%	Relative lipoprotein lipid concentrations	Very small VLDL ratios	Yes
XS_VLDL_FC_pct	Free cholesterol to total lipids ratio in very small VLDL	%	Relative lipoprotein lipid concentrations	Very small VLDL ratios	Yes
XS_VLDL_PL_pct	Phospholipids to total lipids ratio in very small VLDL	%	Relative lipoprotein lipid concentrations	Very small VLDL ratios	Yes
XS_VLDL_TG_pct	Triglycerides to total lipids ratio in very small VLDL	%	Relative lipoprotein lipid concentrations	Very small VLDL ratios	Yes
XXL_VLDL_C_pct	Cholesterol to total lipids ratio in chylomicrons and extremely large VLDL	%	Relative lipoprotein lipid concentrations	Chylomicrons and extremely large VLDL ratios	Yes
XXL_VLDL_CE_pct	Cholesteryl esters to total lipids ratio in chylomicrons and extremely large VLDL	%	Relative lipoprotein lipid concentrations	Chylomicrons and extremely large VLDL ratios	Yes
XXL_VLDL_FC_pct	Free cholesterol to total lipids ratio in chylomicrons and extremely large VLDL	%	Relative lipoprotein lipid concentrations	Chylomicrons and extremely large VLDL ratios	Yes
XXL_VLDL_PL_pct	Phospholipids to total lipids ratio in chylomicrons and extremely large VLDL	%	Relative lipoprotein lipid concentrations	Chylomicrons and extremely large VLDL ratios	Yes
XXL_VLDL_TG_pct	Triglycerides to total lipids ratio in chylomicrons and extremely large VLDL	%	Relative lipoprotein lipid concentrations	Chylomicrons and extremely large VLDL ratios	Yes

## Sheet: ST2
Primary outcome	Study/consortium	Publication year	Case definition	N studies	N participants	Ancestry	Imputation reference panel	Control for population structure	Model	Units	PMID	Data access
					(cases / controls)
Coronary artery disease	CARDIoGRAM-plusC4D	2015	Inclusive CAD diagnosis (e.g., myocardial infarction, acute coronary syndrome, chronic stable angina or coronary stenosis of >50%)	48	184305	European (77%)	1000G phase 1 v3	Double genomic inflation factor correction	A	log odds	26343387	http://www.cardiogramplusc4d.org/data-downloads/
					(60,801 / 123,504)
Ischemic stroke	MEGASTROKE	2018	Case ascertainment varied across studies	17	446696	European	1000G phase 1	Genomic inflation factor correction	A	log odds	29531354	http://www.megastroke.org/
					(40,585 / 406,111)
Heart failure	HERMES	2020	Clinical diagnosis of heart failure of any aetiology with no inclusion criteria based on left ventricular ejection fraction	26	977323	European	1000G (60%), HRC (35%) or others (5%)	Principal components of ancestry	A	log odds	31919418	http://kp4cd.org/datasets/mi
					(47,309 / 930,014)
Atrial fibrillation	Nielsen et al	2018	ICD-10 code I48 and/or ICD-9 code 427.3	6	1030836	European	HRC	Principal components of ancestry, genomic control or mixed models	A	log odds	30061737	http://csg.sph.umich.edu/willer/public/afib2018/
					(60,620 / 970,216)
Aortic aneurysm1	Jones et al	2017	Abdominal aortic aneurysm: Infra-renal aortic diameter ≥30 mm	6	104830	European	1000G	Genomic inflation factor correction	A	log odds	27899403	From correspondence
					(4,972 / 99,858)
Coronary artery disease	UK Biobank	NA	ICD10: I20.X-I25.X	1	464620	European (British)	HRC	Generalized linear mixed models (BOLT-LMM)	A	log odds	NA	https://www.ukbiobank.ac.uk/register-apply/
			ICD9: 410.X-412.X, 414.0, 414.8, 414.9, 429.79		(37,501 / 427,119)
			Self-report: non-cancer illness code (data field: 20002)
			Self-report: health condition diagnosed by doctor (data field: 6150)
Ischemic stroke			ICD10: I63.X		464620
			ICD9: 433.X, 434.X		(4,764 / 459,856)
			Self-report: non-cancer illness code (data field: 20002)
Hemorrhagic stroke			ICD10: I60.X, I61.X		464620
			ICD9: 430.X, 431.X		(2,472 / 462,148)
			Self-report: non-cancer illness code (data field: 20002)
Peripheral artery disease			ICD10: I73.8, I73.9		464620
			ICD9: 443.8, 443.9		(4,513 / 460,107)
			Self-report: non-cancer illness code (data field: 20002)
Aortic aneurysm			ICD10: I71.X		464620
			ICD9: 441.X		(2,248 / 462,372)
			Self-report: non-cancer illness code (data field: 20002)
Venous thromboembolism			ICD10: I26.X, I80.1, I80.2, I81.X, I82.0		464620
			ICD9: 415.1, 451.1, 452.X, 453.X
			Self-report: non-cancer illness code (data field: 20002)		(18,371 / 446,249)
			Self-report: health condition diagnosed by doctor (data field: 6150)
Aortic valve stenosis			ICD10: I35.0, I35.2		464620
					(2,844 / 461,776)
Coronary artery disease	FinnGen (release 4)	2020	ICD10: I20.X-I25.X	1	176899	European (Finish)	Population-specific imputation reference panel (i.e. SISu v3)2	Generalized linear mixed model (SAIGE)	A	log odds	NA	https://www.finngen.fi/en/access_results
					(25,366 / 151,533)
Ischemic stroke			ICD10: I63.X (excl. 163.6), I64		172332
					(8,046 / 164,286)
Hemorrhagic stroke			ICD10 codes: I60.X, I61.X		167126
					(2,086 / 165,040)
Heart failure			ICD10 codes: I11.0, 13.0, I13.2, I50.X		176445
					(17,387 / 159,058)
Atrial fibrillation			ICD10 codes: I48.X		114539
					(17,325 / 97,214)
Peripheral artery disease			ICD10 codes: E10.5, E11.5, E12.5, E13.5, E14.5, I70.2, I73.9		173166
					(5,323 / 167,843)
Aortic aneurysm			ICD10 codes: I71.1-I71.9		169762
					(1,919 / 167,843)
Venous thromboembolism			ICD10 codes: I26.X, I80.X, O87.1, O88.2		176899
					(6,913 / 169,986)
1000G: 1000 Genomes; HRC: Haplotype Reference Consortium; CAD: coronary artery disease; ICD: International Classication of Diseases
1 Log odds per effect allele (and corresponding standard error) was approximated from z-statistics provided by the original GWAS using the equation: beta = sqrt( z^2 / (z^2 + ncase) / 2 / (maf * (1-maf)) * pi^2/3 ) * sign(z)
2 SISu v3 consists of 3,775 high coverage (30x) WGS Finnish individuals from six cohorts. More information: https://finngen.gitbook.io/documentation/methods/genotype-imputation/sisu-reference-panel

## Sheet: ST3
	DHA		Total omega-3		Linoleic acid		Total fatty acids		Tryglycerides		LDL-cholesterol		Apolipoprotein B
	rG	rG (SE)	rG	rG (SE)	rG	rG (SE)	rG	rG (SE)	rG	rG (SE)	rG	rG (SE)	rG	rG (SE)
DHA							0.3021	0.0774	-0.007	0.0793	0.5674	0.081	0.4365	0.0705
Total omega-3	0.8489	0.0233					0.6892	0.0538	0.4933	0.0683	0.505	0.0959	0.6312	0.0997
Linoleic acid	0.3918	0.0696	0.6109	0.0676			0.8178	0.0442	0.6043	0.0623	0.6798	0.0903	0.7948	0.0681
Total omega-6	0.4605	0.0626	0.6825	0.0558	0.9492	0.0317	0.8965	0.0199	0.6125	0.0647	0.7558	0.0628	0.8429	0.0458

## Sheet: ST4A
ensg	symbol	chr	start	end	strand	type	entrezID	HUGO	pLI	ncRVIS	posMapSNPs	posMapMaxCADD	eqtlMapSNPs	eqtlMapminP	eqtlMapminQ	eqtlMapts	eqtlDirection	ciMap	ciMapts	minGwasP	IndSigSNPs	GenomicLocus
ENSG00000143126	CELSR2	1	109792641	109818372	1	protein_coding	1952	CELSR2	0.999999	0.807304	23	18.47	27	9.42742e-34	2.20583e-27	GTEx/v8/Adipose_Subcutaneous:GTEx/v8/Liver:GTEx/v8/Pancreas	-	Yes	Promoter_anchored_loops:Fetal_Cortex:Spleen	7.3e-20	rs6657811;1:109809343_CT_C;rs4970834;rs11102967;rs629301;rs657420;rs629301:rs629301;rs4970834:rs11102967:rs657420:rs6657811:1:109809343_CT_C:rs4970834	3
ENSG00000134222	PSRC1	1	109822178	109825808	-1	protein_coding	84722	PSRC1	1.74718e-06	-0.20888	24	18.47	27	1.0541e-37	1.834e-30	GTEx/v8/Adipose_Subcutaneous:GTEx/v8/Adipose_Visceral_Omentum:GTEx/v8/Artery_Aorta:GTEx/v8/Artery_Tibial:GTEx/v8/Heart_Left_Ventricle:GTEx/v8/Liver:GTEx/v8/Pancreas	-	No	NA	7.3e-20	rs4970834;rs11102967;rs629301;rs657420;rs6657811	3
ENSG00000134243	SORT1	1	109852192	109940573	-1	protein_coding	6272	SORT1	0.999927	-1.34619	0	0	20	3.08634e-54	3.21918e-45	GTEx/v8/Liver	-	Yes	Promoter_anchored_loops:Adult_Cortex:Fetal_Cortex:Spleen:GM12878:IMR90:Mesenchymal_Stem_Cell:Mesendoderm:Trophoblast-like_Cell:hESC	7.3e-20	rs6657811;rs4970834;rs11102967;rs629301;rs6657811:1:109809343_CT_C:rs629301:rs629301;rs4970834:rs11102967:rs657420:rs4970834	3
ENSG00000143028	SYPL2	1	110009180	110024759	1	protein_coding	284612	SYPL2	0.0167711	0.437866	0	0	21	5.67264e-10	1.41445e-54	GTEx/v8/Artery_Aorta:GTEx/v8/Artery_Coronary:GTEx/v8/Artery_Tibial:GTEx/v8/Heart_Atrial_Appendage:GTEx/v8/Liver	-	Yes	Fetal_Cortex:IMR90:Mesenchymal_Stem_Cell	7.3e-20	rs6657811;rs4970834;rs629301;rs11102967;rs657420;rs657420:rs6657811:1:109809343_CT_C:rs4970834:rs11102967:rs629301;rs4970834:rs629301	3
ENSG00000162650	ATXN7L2	1	110026101	110035426	1	protein_coding	127002	ATXN7L2	0.718955	NA	0	0	14	5.83014e-07	6.65426e-17	GTEx/v8/Liver	-	Yes	Adult_Cortex:Fetal_Cortex:IMR90:Mesenchymal_Stem_Cell	7.3e-20	rs11102967;rs629301;rs4970834;rs657420;rs657420:rs6657811:1:109809343_CT_C:rs4970834:rs11102967:rs629301;rs4970834:rs629301	3
ENSG00000174151	CYB561D1	1	110036674	110045554	1	protein_coding	284613	CYB561D1	0.0158304	-0.395994	0	0	0	NA	NA	NA	NA	Yes	Adult_Cortex:Fetal_Cortex:IMR90:Mesenchymal_Stem_Cell	7.3e-20	rs657420:rs6657811:1:109809343_CT_C:rs4970834:rs11102967:rs629301;rs4970834:rs629301	3
ENSG00000031698	SARS	1	109756540	109780791	1	protein_coding	6301	SARS	0.999151	-0.332038	0	0	0	NA	NA	NA	NA	Yes	Adult_Cortex:Fetal_Cortex	1.2e-19	rs657420:rs629301:rs629301;rs4970834:rs11102967	3
ENSG00000162607	USP1	1	62901968	62917475	1	protein_coding	7398	USP1	0.993181	-1.54208	50	18.26	7	1.97043e-07	0.000432786	GTEx/v8/Adipose_Subcutaneous:GTEx/v8/Artery_Tibial	+	Yes	Promoter_anchored_loops:IMR90:Mesenchymal_Stem_Cell:Mesendoderm:Trophoblast-like_Cell:hESC	2.8e-19	rs638714;rs778356958;rs371562288;rs1183851;rs10889363;rs536629310;rs7512480;rs6688417:rs638714;rs371562288:rs638714:rs10889363;rs536629310:rs638714;rs371562288:rs1183851:rs638714;rs778356958:rs778356958:rs10889363:rs6688417:1:63045366_GA_G	2
ENSG00000116641	DOCK7	1	62920399	63153969	-1	protein_coding	85440	DOCK7	0.771361	NA	277	18.64	401	1.09201e-20	9.93875e-16	GTEx/v8/Artery_Aorta:GTEx/v8/Artery_Tibial:GTEx/v8/Heart_Atrial_Appendage:GTEx/v8/Heart_Left_Ventricle	+	Yes	Adult_Cortex:IMR90:Mesenchymal_Stem_Cell:Mesendoderm	2.8e-19	rs638714;rs778356958;rs371562288;rs10889363;rs536629310;rs1183851;rs55853774;1:63045366_GA_G;1:63134595_CA_C;1:63149883_TA_T;rs6688417;rs7512480;rs10889363:rs778356958:rs638714;rs371562288:rs638714:rs10889363;rs536629310:rs638714;rs371562288:rs1183851:1:63045366_GA_G	2
ENSG00000132855	ANGPTL3	1	63063158	63071830	1	protein_coding	27329	ANGPTL3	2.12016e-07	-0.803837	15	12.12	15	1.13102e-05	0.0421505	GTEx/v8/Liver	+	Yes	Left_Ventricle:Liver:IMR90:Mesenchymal_Stem_Cell:Mesendoderm:Trophoblast-like_Cell:hESC	2.8e-19	rs638714;rs371562288;rs778356958;rs371562288:rs638714:rs10889363;rs536629310:rs638714;rs371562288:rs1183851:rs638714;rs778356958:rs778356958:rs10889363:rs371562288:rs536629310:rs55853774:1:63134595_CA_C:1:63149883_TA_T:rs6688417:rs7512480;rs6688417:rs7512480	2
ENSG00000269624	AL138847.1	1	63073437	63075249	1	protein_coding	NA	NA	NA	NA	11	12.12	0	NA	NA	NA	NA	Yes	Left_Ventricle:Liver:IMR90:Mesenchymal_Stem_Cell:Mesendoderm:Trophoblast-like_Cell:hESC	2.8e-19	rs638714;rs371562288;rs1183851;rs778356958;rs371562288:rs638714:rs10889363;rs536629310:rs638714;rs371562288:rs1183851:rs638714;rs778356958:rs778356958:rs10889363:rs371562288:rs536629310:rs55853774:1:63134595_CA_C:1:63149883_TA_T:rs6688417:rs7512480;rs6688417:rs7512480	2
ENSG00000125703	ATG4C	1	63249806	63331184	1	protein_coding	84938	ATG4C	3.32762e-09	-0.809377	92	17.7	66	6.89586e-06	0.00836476	GTEx/v8/Artery_Tibial	+	Yes	Promoter_anchored_loops:Liver:GM12878:IMR90:Mesenchymal_Stem_Cell:Mesendoderm:hESC	2.8e-19	rs7512480;rs6688417;rs638714:rs638714;rs778356958;rs371562288:rs1183851:rs638714;rs371562288:rs10889363;rs536629310:rs638714;rs778356958:rs371562288:rs536629310:1:63045366_GA_G:rs55853774:rs778356958:rs10889363	2
ENSG00000203965	EFCAB7	1	63989043	64038364	1	protein_coding	84455	EFCAB7	1.67072e-12	-0.503488	0	0	0	NA	NA	NA	NA	Yes	IMR90:Mesenchymal_Stem_Cell:Mesendoderm:Trophoblast-like_Cell:hESC	2.8e-19	rs638714:rs638714;rs778356958;rs371562288:rs1183851:rs638714;rs371562288:rs638714;rs778356958:rs10889363;rs536629310:rs7512480;rs6688417:rs6688417:rs7512480:1:63045366_GA_G:rs778356958:rs10889363:rs55853774	2
ENSG00000134709	HOOK1	1	60280458	60342050	1	protein_coding	51361	HOOK1	4.1567e-05	-0.0627975	0	0	0	NA	NA	NA	NA	Yes	Left_Ventricle:Mesenchymal_Stem_Cell	5.3e-19	rs638714;rs371562288:rs1183851:rs10889363;rs536629310:rs638714;rs778356958;rs371562288:rs638714	2
ENSG00000116652	DLEU2L	1	64014588	64015405	1	protein_coding	79469	DLEU2L	NA	NA	0	0	0	NA	NA	NA	NA	Yes	Left_Ventricle:IMR90:Mesenchymal_Stem_Cell:Mesendoderm:hESC	5.3e-19	rs638714;rs778356958;rs371562288:rs638714:rs10889363;rs536629310:rs638714;rs371562288:rs1183851:rs7512480;rs6688417:rs6688417:rs7512480:rs371562288:rs536629310:rs638714;rs778356958:rs778356958:rs10889363	2
ENSG00000162437	RAVER2	1	65210778	65298915	1	protein_coding	55225	RAVER2	1.85996e-06	-0.746777	0	0	0	NA	NA	NA	NA	Yes	Left_Ventricle:IMR90:Mesenchymal_Stem_Cell:hESC	5.8e-19	rs638714;rs371562288:rs638714:rs371562288:rs536629310:rs10889363;rs536629310:rs7512480;rs6688417:rs6688417:rs7512480:1:63045366_GA_G:rs638714;rs778356958:rs1183851:rs778356958:rs10889363	2
ENSG00000116209	TMEM59	1	54497347	54519177	-1	protein_coding	9528	TMEM59	2.23025e-07	0.206649	0	0	1	2.03947e-05	0.00196452	GTEx/v8/Artery_Aorta	+	No	NA	2.4e-13	rs11591147	1
ENSG00000169174	PCSK9	1	55505221	55530525	1	protein_coding	255738	PCSK9	1.02508e-10	0.264271	1	15.41	0	NA	NA	NA	NA	No	NA	2.4e-13	rs11591147	1
ENSG00000088035	ALG6	1	63833261	63904233	1	protein_coding	29929	ALG6	0.0553676	-0.307103	0	0	0	NA	NA	NA	NA	Yes	Mesendoderm	1.4e-10	rs7512480;rs6688417:rs6688417:rs7512480	2
ENSG00000181754	AMIGO1	1	110046797	110052360	-1	protein_coding	57463	AMIGO1	0.888493	-0.212526	0	0	7	1.84657e-16	3.62238e-97	GTEx/v8/Adipose_Subcutaneous:GTEx/v8/Adipose_Visceral_Omentum:GTEx/v8/Artery_Aorta:GTEx/v8/Artery_Tibial:GTEx/v8/Heart_Atrial_Appendage:GTEx/v8/Heart_Left_Ventricle:GTEx/v8/Liver	-	Yes	Promoter_anchored_loops:EP_correlation_cell_type_oneway	2e-10	rs657420;rs6657811:1:109809343_CT_C	3
ENSG00000156097	GPR61	1	110082494	110091028	1	protein_coding	83873	GPR61	0.801489	-0.58687	0	0	0	NA	NA	NA	NA	Yes	Promoter_anchored_loops	2e-10	rs6657811:1:109809343_CT_C	3
ENSG00000121957	GPSM2	1	109417972	109477167	1	protein_coding	29899	GPSM2	2.9413e-10	0.141118	0	0	0	NA	NA	NA	NA	Yes	EP_correlation_organ_oneway	1.5e-08	rs6657811	3
ENSG00000085433	WDR47	1	109512836	109584850	-1	protein_coding	22911	WDR47	0.905662	-0.351231	0	0	0	NA	NA	NA	NA	Yes	EP_correlation_cell_type_oneway:EP_correlation_organ_oneway:Fetal_Cortex	1.5e-08	rs6657811:rs657420	3
ENSG00000179902	C1orf194	1	109648573	109656479	-1	protein_coding	127003	C1orf194	2.5003e-07	NA	0	0	0	NA	NA	NA	NA	Yes	EP_correlation_cell_type_oneway:EP_correlation_organ_oneway	1.5e-08	rs6657811	3
ENSG00000116299	KIAA1324	1	109656301	109749401	1	protein_coding	57535	KIAA1324	2.14865e-08	NA	0	0	0	NA	NA	NA	NA	Yes	EP_correlation_cell_type_oneway:EP_correlation_organ_oneway	1.5e-08	rs6657811	3
ENSG00000221986	MYBPHL	1	109834987	109849663	-1	protein_coding	343263	MYBPHL	0.00461844	0.281706	8	11.65	0	NA	NA	NA	NA	Yes	EP_links_oneway	1.5e-08	rs657420;rs6657811	3
ENSG00000069248	NUP133	1	229577045	229644103	-1	protein_coding	55746	NUP133	0.0662324	-0.412791	0	0	0	NA	NA	NA	NA	Yes	Mesenchymal_Stem_Cell:Mesendoderm	3.3e-08	rs11122450	4
ENSG00000135801	TAF5L	1	229728858	229761794	-1	protein_coding	27097	TAF5L	0.98585	-0.172749	0	0	0	NA	NA	NA	NA	Yes	Adult_Cortex:Fetal_Cortex:Aorta:GM12878:IMR90:Mesenchymal_Stem_Cell:Mesendoderm:Trophoblast-like_Cell:hESC	3.3e-08	rs11122450	4
ENSG00000135763	URB2	1	229761981	229795946	1	protein_coding	9816	URB2	3.33649e-11	0.0238572	0	0	0	NA	NA	NA	NA	Yes	Adult_Cortex:Fetal_Cortex:Aorta:GM12878:IMR90:Mesenchymal_Stem_Cell:Mesendoderm:Trophoblast-like_Cell:hESC	3.3e-08	rs11122450	4
ENSG00000143641	GALNT2	1	230193536	230417870	1	protein_coding	2590	GALNT2	0.881986	4.22366	30	11.93	2	4.23554e-05	1.659e-07	GTEx/v8/Adipose_Subcutaneous	+	Yes	IMR90:Mesendoderm:Trophoblast-like_Cell:hESC	3.3e-08	rs11122450	4
ENSG00000154429	CCSAP	1	229456758	229479041	-1	protein_coding	126731	CCSAP	0.111783	-1.4236	0	0	0	NA	NA	NA	NA	Yes	Adult_Cortex:Fetal_Cortex	3.5e-08	rs11122450	4
ENSG00000135776	ABCB10	1	229652329	229694442	-1	protein_coding	23456	ABCB10	7.94786e-06	-0.0171922	0	0	0	NA	NA	NA	NA	Yes	Adult_Cortex:Fetal_Cortex	3.5e-08	rs11122450	4
ENSG00000215717	TMEM167B	1	109632425	109639556	1	protein_coding	56900	TMEM167B	0.632477	-0.0383717	0	0	0	NA	NA	NA	NA	Yes	Adult_Cortex	1.9e-06	rs657420	3
ENSG00000143106	PSMA5	1	109941653	109969062	-1	protein_coding	5686	PSMA5	0.974256	-1.08409	0	0	0	NA	NA	NA	NA	Yes	Adult_Cortex:Fetal_Cortex	1.9e-06	rs657420	3
ENSG00000168765	GSTM4	1	110198703	110208118	1	protein_coding	2948	GSTM4	0.000917345	0.373952	0	0	0	NA	NA	NA	NA	Yes	Adult_Cortex	1.9e-06	rs657420	3
ENSG00000138085	ATRAID	2	27434895	27440046	1	protein_coding	51374	ATRAID	0.00791395	NA	0	0	143	2.77951e-11	5.3045e-26	GTEx/v8/Adipose_Subcutaneous:GTEx/v8/Adipose_Visceral_Omentum:GTEx/v8/Artery_Aorta:GTEx/v8/Artery_Tibial	-	Yes	Promoter_anchored_loops:Adult_Cortex:Fetal_Cortex	2.5e-30	rs780110;rs1260326;rs780110:rs1260326	6
ENSG00000115234	SNX17	2	27593389	27599995	1	protein_coding	9784	SNX17	0.68618	-0.681943	23	18.47	177	1.17643e-13	2.00912e-09	GTEx/v8/Adipose_Subcutaneous:GTEx/v8/Artery_Aorta:GTEx/v8/Artery_Tibial:GTEx/v8/Heart_Atrial_Appendage:GTEx/v8/Heart_Left_Ventricle	+	Yes	Promoter_anchored_loops:Adult_Cortex:Fetal_Cortex:Liver:GM12878:IMR90:Mesenchymal_Stem_Cell:Mesendoderm:Trophoblast-like_Cell:hESC	2.5e-30	rs780110;rs1260326;2:27739880_CT_C;rs4665985;rs77200710;2:28003616_TA_T;rs67798437;rs780110:rs67798437:rs77200710;rs4665985:rs77200710:rs77200710;2:28003616_TA_T:rs1728918:rs67086575:2:27786252_CTTTTTTTTTT_C	6
ENSG00000115241	PPM1G	2	27604061	27632554	-1	protein_coding	5496	PPM1G	0.99601	-0.482626	49	12.85	181	1.94157e-13	1.67809e-09	GTEx/v8/Adipose_Subcutaneous:GTEx/v8/Adipose_Visceral_Omentum:GTEx/v8/Artery_Tibial:GTEx/v8/Heart_Atrial_Appendage:GTEx/v8/Pancreas	+	Yes	Promoter_anchored_loops:GM12878:IMR90:Mesenchymal_Stem_Cell	2.5e-30	rs780110;rs1260326;rs1728918;2:27739880_CT_C;rs67798437;rs780110:rs1260326:rs67798437:rs77200710;rs4665985:rs77200710:rs67086575:rs77200710;2:28003616_TA_T	6
ENSG00000115216	NRBP1	2	27650657	27665126	1	protein_coding	29959	NRBP1	0.999549	-1.38971	42	14.1	222	1.48664e-19	1.00894e-14	GTEx/v8/Adipose_Subcutaneous:GTEx/v8/Adipose_Visceral_Omentum:GTEx/v8/Artery_Aorta:GTEx/v8/Artery_Tibial:GTEx/v8/Heart_Atrial_Appendage	+	Yes	Promoter_anchored_loops:Adult_Cortex:Fetal_Cortex:Liver:GM12878:IMR90:Mesenchymal_Stem_Cell:Mesendoderm:Trophoblast-like_Cell:hESC	2.5e-30	rs780110;rs1260326;rs1728918;2:27739880_CT_C;rs67798437;rs77200710;rs4665985;rs67086575;2:28003616_TA_T;rs780110:rs1260326:rs1260326;2:27739880_CT_C:2:27739880_CT_C:rs67798437:rs77200710;rs4665985:rs77200710:rs77200710;2:28003616_TA_T:rs67086575:rs4665985:2:27786252_CTTTTTTTTTT_C	6
ENSG00000157992	KRTCAP3	2	27665233	27669348	1	protein_coding	200634	KRTCAP3	0.0445235	NA	24	9.832	172	6.96594e-10	4.42568e-06	GTEx/v8/Adipose_Visceral_Omentum	-	Yes	Promoter_anchored_loops:Liver:GM12878:IMR90:Mesenchymal_Stem_Cell:Mesendoderm:Trophoblast-like_Cell:hESC	2.5e-30	rs780110;rs1260326;2:27739880_CT_C;rs67798437;rs780110:rs1728918:rs77200710;rs4665985:rs67798437:rs77200710:rs77200710;2:28003616_TA_T:rs1260326:rs67086575:rs1260326;2:27739880_CT_C:2:27739880_CT_C:rs4665985:2:27786252_CTTTTTTTTTT_C	6
ENSG00000138002	IFT172	2	27667238	27712656	-1	protein_coding	26160	IFT172	2.29012e-18	-0.505255	67	15.52	0	NA	NA	NA	NA	Yes	Promoter_anchored_loops:Adult_Cortex:Fetal_Cortex:Left_Ventricle:Liver:GM12878:IMR90:Mesenchymal_Stem_Cell:Mesendoderm:Trophoblast-like_Cell:hESC	2.5e-30	rs780110;rs67086575;rs780110:rs67798437:rs77200710;rs4665985:rs77200710:rs77200710;2:28003616_TA_T:rs1260326:rs1728918:rs1260326;2:27739880_CT_C:2:27739880_CT_C:rs4665985:2:27786252_CTTTTTTTTTT_C	6
ENSG00000115226	FNDC4	2	27714750	27718112	-1	protein_coding	64838	FNDC4	0.759219	NA	22	15.52	0	NA	NA	NA	NA	Yes	Promoter_anchored_loops:Adult_Cortex:Fetal_Cortex:Left_Ventricle:Liver:GM12878:IMR90:Mesenchymal_Stem_Cell:Mesendoderm:Trophoblast-like_Cell:hESC	2.5e-30	rs780110;rs780110:rs67798437:rs77200710;rs4665985:rs77200710:rs77200710;2:28003616_TA_T:rs1260326:rs1728918:rs1260326;2:27739880_CT_C:2:27739880_CT_C:rs4665985:2:27786252_CTTTTTTTTTT_C	6
ENSG00000084734	GCKR	2	27719709	27746554	1	protein_coding	2646	GCKR	3.58393e-16	-0.155698	54	15.52	0	NA	NA	NA	NA	Yes	Promoter_anchored_loops:Adult_Cortex:Fetal_Cortex:Left_Ventricle:Liver:GM12878:IMR90:Mesenchymal_Stem_Cell:Mesendoderm:Trophoblast-like_Cell:hESC	2.5e-30	rs780110;rs1260326;2:27739880_CT_C;rs4665985;rs67798437;rs77200710;rs780110:rs67798437:rs77200710;rs4665985:rs1260326:rs77200710:rs77200710;2:28003616_TA_T:rs1728918:rs67086575:rs1260326;2:27739880_CT_C:2:27739880_CT_C:rs4665985:2:27786252_CTTTTTTTTTT_C	6
ENSG00000233438	AC109829.1	2	27760253	27790011	1	protein_coding	NA	NA	NA	NA	40	9.736	0	NA	NA	NA	NA	Yes	IMR90:Mesenchymal_Stem_Cell:Mesendoderm:Trophoblast-like_Cell:hESC	2.5e-30	rs1260326;2:27739880_CT_C;rs780110;rs4665985;rs67798437;rs77200710;2:27786252_CTTTTTTTTTT_C;rs780110:rs1260326:rs67086575:rs1260326;2:27739880_CT_C:2:27739880_CT_C:rs4665985:rs67798437:rs77200710;rs4665985:rs77200710:rs77200710;2:28003616_TA_T	6
ENSG00000221843	C2orf16	2	27799389	27805588	1	protein_coding	84226	C2orf16	3.91662e-17	-0.329747	15	14.88	0	NA	NA	NA	NA	Yes	IMR90:Mesenchymal_Stem_Cell:Mesendoderm:Trophoblast-like_Cell:hESC	2.5e-30	rs77200710;rs4665985;rs67798437;rs780110:rs1260326:rs67086575:rs1260326;2:27739880_CT_C:2:27739880_CT_C:rs4665985:rs67798437:rs77200710;rs4665985:rs77200710:rs77200710;2:28003616_TA_T	6
ENSG00000243943	ZNF512	2	27805897	27858041	1	protein_coding	84450	ZNF512	0.949147	-1.27925	42	14.88	0	NA	NA	NA	NA	Yes	Promoter_anchored_loops:Adult_Cortex:Fetal_Cortex:Liver:GM12878:IMR90:Mesenchymal_Stem_Cell:Mesendoderm:Trophoblast-like_Cell:hESC	2.5e-30	rs67798437;rs77200710;rs4665985;2:28003616_TA_T;rs780110:rs77200710;rs4665985:rs67798437:rs1260326:rs67086575:rs1728918:rs77200710:rs77200710;2:28003616_TA_T:rs1260326;2:27739880_CT_C:2:27739880_CT_C:rs4665985:2:27786252_CTTTTTTTTTT_C	6
ENSG00000176714	CCDC121	2	27848506	27851879	-1	protein_coding	79635	CCDC121	9.72714e-05	-0.266319	10	14.13	0	NA	NA	NA	NA	Yes	Promoter_anchored_loops:Left_Ventricle:Liver:GM12878:IMR90:Mesenchymal_Stem_Cell:Mesendoderm:Trophoblast-like_Cell:hESC	2.5e-30	rs67798437;rs77200710;rs4665985;rs780110:rs67086575:rs1260326:rs67798437:rs77200710;rs4665985:rs77200710:rs1728918:rs1260326;2:27739880_CT_C:2:27739880_CT_C:rs4665985:2:27786252_CTTTTTTTTTT_C:rs77200710;2:28003616_TA_T	6
ENSG00000198522	GPN1	2	27851114	27874375	1	protein_coding	11321	GPN1	0.00490359	-0.238155	8	14.13	216	7.93394e-08	0.000297808	GTEx/v8/Heart_Atrial_Appendage:GTEx/v8/Heart_Left_Ventricle:GTEx/v8/Liver	+	Yes	Promoter_anchored_loops:Left_Ventricle:Liver:GM12878:IMR90:Mesenchymal_Stem_Cell:Mesendoderm:Trophoblast-like_Cell:hESC	2.5e-30	rs67798437;rs77200710;2:28003616_TA_T;rs4665985;rs780110;rs1260326;2:27739880_CT_C;rs780110:rs67086575:rs1260326:rs67798437:rs77200710;rs4665985:rs77200710:rs1728918:rs1260326;2:27739880_CT_C:2:27739880_CT_C:rs4665985:2:27786252_CTTTTTTTTTT_C:rs77200710	6
ENSG00000119760	SUPT7L	2	27873679	27886676	-1	protein_coding	9913	SUPT7L	0.833193	-0.966219	3	4.564	0	NA	NA	NA	NA	Yes	Promoter_anchored_loops:Adult_Cortex:Fetal_Cortex:GM12878:IMR90	2.5e-30	rs77200710;2:28003616_TA_T;rs780110:rs1260326:rs1728918:rs67086575:rs1260326;2:27739880_CT_C:2:27739880_CT_C:rs4665985:rs67798437:rs77200710;rs4665985:rs77200710:rs77200710	6
ENSG00000163798	SLC4A1AP	2	27886338	27917840	1	protein_coding	22950	SLC4A1AP	7.73999e-07	-0.546764	4	15.03	31	1.50619e-06	8.71618e-06	GTEx/v8/Adipose_Subcutaneous:GTEx/v8/Adipose_Visceral_Omentum:GTEx/v8/Artery_Aorta:GTEx/v8/Artery_Tibial	-	Yes	Promoter_anchored_loops:Adult_Cortex:Fetal_Cortex:GM12878:IMR90	2.5e-30	rs77200710;2:28003616_TA_T;rs67798437;rs780110;rs780110:rs1260326:rs1728918:rs67086575:rs1260326;2:27739880_CT_C:2:27739880_CT_C:rs4665985:rs67798437:rs77200710;rs4665985:rs77200710:rs77200710	6
ENSG00000163803	PLB1	2	28680012	28866654	1	protein_coding	151056	PLB1	1.99315e-56	0.411384	0	0	0	NA	NA	NA	NA	Yes	Promoter_anchored_loops:Aorta:Left_Ventricle:Liver:Right_Ventricle:Spleen:GM12878:IMR90:Mesenchymal_Stem_Cell:Mesendoderm:Neural_Progenitor_Cell:Trophoblast-like_Cell:hESC	2.5e-30	rs67798437:rs77200710;rs4665985:rs77200710;2:28003616_TA_T:2:28003616_TA_T:rs77200710:rs780110:rs67086575:2:27786252_CTTTTTTTTTT_C:rs1260326:rs1260326;2:27739880_CT_C:2:27739880_CT_C:rs4665985	6
ENSG00000268656	AC110084.1	2	27998851	28009186	-1	protein_coding	NA	NA	NA	NA	2	8.25	0	NA	NA	NA	NA	Yes	Promoter_anchored_loops:Left_Ventricle:IMR90:Mesenchymal_Stem_Cell:Mesendoderm:Trophoblast-like_Cell:hESC	1.9e-27	2:28003616_TA_T;rs780110:rs1260326;2:27739880_CT_C:rs77200710;2:28003616_TA_T:2:28003616_TA_T	6
ENSG00000084764	MAPRE3	2	27193480	27250064	1	protein_coding	22924	MAPRE3	0.799864	-0.767319	0	0	0	NA	NA	NA	NA	Yes	Adult_Cortex:Fetal_Cortex:GM12878	1.4e-26	rs780110:rs1260326	6
ENSG00000119777	TMEM214	2	27255778	27264563	1	protein_coding	54867	TMEM214	0.00116736	-0.517228	0	0	0	NA	NA	NA	NA	Yes	Adult_Cortex:Fetal_Cortex:GM12878	1.4e-26	rs780110:rs1260326	6
ENSG00000084693	AGBL5	2	27265232	27293490	1	protein_coding	60509	AGBL5	0.0206949	-0.378651	0	0	0	NA	NA	NA	NA	Yes	GM12878	1.4e-26	rs780110:rs1260326	6
ENSG00000228474	OST4	2	27293340	27294641	-1	protein_coding	100128731	OST4	NA	NA	0	0	0	NA	NA	NA	NA	Yes	Adult_Cortex:Fetal_Cortex:GM12878:IMR90:Mesenchymal_Stem_Cell:Trophoblast-like_Cell:hESC	1.4e-26	rs780110:rs1260326	6
ENSG00000138080	EMILIN1	2	27301435	27309271	1	protein_coding	11117	EMILIN1	0.00521656	NA	0	0	0	NA	NA	NA	NA	Yes	Adult_Cortex:Fetal_Cortex:GM12878:IMR90:Mesenchymal_Stem_Cell:Trophoblast-like_Cell:hESC	1.4e-26	rs780110:rs1260326	6
ENSG00000138030	KHK	2	27309615	27323640	1	protein_coding	3795	KHK	5.36079e-05	NA	0	0	0	NA	NA	NA	NA	Yes	Adult_Cortex:Fetal_Cortex:GM12878:IMR90:Mesenchymal_Stem_Cell:Trophoblast-like_Cell:hESC	1.4e-26	rs780110:rs1260326	6
ENSG00000138028	CGREF1	2	27321757	27341995	-1	protein_coding	10669	CGREF1	5.50291e-08	0.491986	0	0	0	NA	NA	NA	NA	Yes	Adult_Cortex:Fetal_Cortex:Liver:GM12878:IMR90:Mesenchymal_Stem_Cell:Mesendoderm:Trophoblast-like_Cell	1.4e-26	rs780110:rs1260326	6
ENSG00000143994	ABHD1	2	27346682	27353680	1	protein_coding	84696	ABHD1	1.06027e-21	-0.251069	0	0	0	NA	NA	NA	NA	Yes	Adult_Cortex:Fetal_Cortex:Liver:GM12878:IMR90:Mesenchymal_Stem_Cell:Mesendoderm:Trophoblast-like_Cell	1.4e-26	rs780110:rs1260326	6
ENSG00000138073	PREB	2	27353624	27357543	-1	protein_coding	10113	PREB	0.00189836	-0.154459	0	0	0	NA	NA	NA	NA	Yes	Promoter_anchored_loops:Adult_Cortex:Fetal_Cortex:Liver:GM12878:IMR90:Mesenchymal_Stem_Cell:Mesendoderm:Trophoblast-like_Cell	1.4e-26	rs780110:rs1260326	6
ENSG00000138074	SLC5A6	2	27422455	27435826	-1	protein_coding	8884	SLC5A6	0.571968	-0.400099	0	0	149	3.91291e-09	1.13875e-17	GTEx/v8/Artery_Aorta:GTEx/v8/Artery_Coronary:GTEx/v8/Artery_Tibial:GTEx/v8/Heart_Left_Ventricle	+	Yes	Promoter_anchored_loops:Adult_Cortex:Fetal_Cortex	1.4e-26	rs780110;rs1260326;2:27739880_CT_C;rs780110:rs1260326	6
ENSG00000084774	CAD	2	27440258	27466811	1	protein_coding	790	CAD	1	-0.710759	0	0	142	3.06886e-10	9.08683e-20	GTEx/v8/Heart_Left_Ventricle:GTEx/v8/Pancreas	-	Yes	Promoter_anchored_loops:Adult_Cortex:Fetal_Cortex:IMR90:Mesenchymal_Stem_Cell:Mesendoderm:hESC	1.4e-26	rs780110;rs1260326;rs780110:rs1260326	6
ENSG00000115194	SLC30A3	2	27476552	27498685	-1	protein_coding	7781	SLC30A3	0.646084	-0.660463	0	0	1	2.22523e-09	7.40729e-24	GTEx/v8/Heart_Left_Ventricle	+	Yes	Fetal_Cortex:GM12878:IMR90:Mesenchymal_Stem_Cell:Mesendoderm	1.4e-26	rs67086575;rs780110:rs1260326	6
ENSG00000163793	DNAJC5G	2	27498289	27504367	1	protein_coding	285126	DNAJC5G	0.00397479	-0.706718	0	0	0	NA	NA	NA	NA	Yes	Fetal_Cortex:GM12878:IMR90:Mesenchymal_Stem_Cell:Mesendoderm	1.4e-26	rs780110:rs1260326	6
ENSG00000138100	TRIM54	2	27505260	27530307	1	protein_coding	57159	TRIM54	8.24708e-07	-1.05327	0	0	0	NA	NA	NA	NA	Yes	Adult_Cortex:GM12878:IMR90:Mesenchymal_Stem_Cell:Mesendoderm	1.4e-26	rs780110:rs1260326	6
ENSG00000115204	MPV17	2	27532360	27548547	-1	protein_coding	4358	MPV17	1.10287e-08	-0.205369	4	18.95	0	NA	NA	NA	NA	Yes	Promoter_anchored_loops:Adult_Cortex:Fetal_Cortex	1.4e-26	rs780110;rs780110:rs1260326:rs67798437:rs77200710;rs4665985	6
ENSG00000115207	GTF3C2	2	27548716	27579868	-1	protein_coding	2976	GTF3C2	0.999786	-0.837016	30	18.95	0	NA	NA	NA	NA	Yes	Promoter_anchored_loops:Adult_Cortex:Fetal_Cortex:Liver:GM12878:IMR90:Mesenchymal_Stem_Cell:Mesendoderm:Trophoblast-like_Cell:hESC	1.4e-26	rs780110;rs780110:rs1260326:rs77200710;2:28003616_TA_T:rs67798437:rs77200710;rs4665985:rs77200710:rs1728918:rs67086575:2:27786252_CTTTTTTTTTT_C	6
ENSG00000115211	EIF2B4	2	27587219	27593353	-1	protein_coding	8890	EIF2B4	0.83261	-0.214235	24	18.47	0	NA	NA	NA	NA	Yes	Promoter_anchored_loops:Adult_Cortex:Fetal_Cortex:Liver:GM12878:IMR90:Mesenchymal_Stem_Cell:Mesendoderm:Trophoblast-like_Cell:hESC	1.4e-26	rs780110;rs1260326;rs780110:rs67798437:rs77200710;rs4665985:rs77200710:rs77200710;2:28003616_TA_T:rs1728918:rs67086575:2:27786252_CTTTTTTTTTT_C	6
ENSG00000163795	ZNF513	2	27600098	27603657	-1	protein_coding	130557	ZNF513	0.940738	NA	17	18.47	26	3.61445e-05	0.0342333	GTEx/v8/Artery_Aorta	+	Yes	Promoter_anchored_loops:Adult_Cortex:Fetal_Cortex:GM12878:IMR90:Mesenchymal_Stem_Cell	1.4e-26	rs780110;rs1260326;rs780110:rs1728918:rs1260326:rs67798437:rs77200710;rs4665985:rs77200710:rs67086575:rs77200710;2:28003616_TA_T	6
ENSG00000075426	FOSL2	2	28615315	28640179	1	protein_coding	2355	FOSL2	0.925334	-2.20416	0	0	0	NA	NA	NA	NA	Yes	Promoter_anchored_loops:Aorta:Bladder:Left_Ventricle:Liver:Lung:Pancreas:Psoas:Right_Ventricle:Spleen:GM12878:IMR90:Mesenchymal_Stem_Cell:Mesendoderm:Neural_Progenitor_Cell:Trophoblast-like_Cell:hESC	1.4e-26	rs77200710;2:28003616_TA_T:2:28003616_TA_T:rs780110:rs1260326:rs67086575:rs77200710;rs4665985:rs67798437:rs77200710	6
ENSG00000118960	HS1BP3	2	20760208	20850849	-1	protein_coding	64342	HS1BP3	0.000353325	2.11433	0	0	0	NA	NA	NA	NA	Yes	Mesendoderm:Trophoblast-like_Cell:hESC	7.4e-24	rs531819:rs562338;rs531819:rs60403635:rs562338;rs531819;rs7419374:2:21277213_GCT_G:rs562338:rs562338;rs34601365;rs380240:rs375330151:rs71435594:rs12618122:rs562338;rs7419374:rs562338;rs380240:rs34601365:rs368220458	5
ENSG00000143869	GDF7	2	20866424	20873418	1	protein_coding	151449	GDF7	0.778067	0.171954	0	0	0	NA	NA	NA	NA	Yes	Mesendoderm:Trophoblast-like_Cell:hESC	7.4e-24	rs531819:rs562338;rs531819:rs60403635:rs562338;rs531819;rs7419374:2:21277213_GCT_G:rs562338:rs562338;rs34601365;rs380240:rs375330151:rs71435594:rs12618122:rs562338;rs7419374:rs562338;rs380240:rs34601365:rs368220458	5
ENSG00000118961	C2orf43	2	20883788	21022882	-1	protein_coding	60526	C2orf43	0.000647485	-0.605069	0	0	0	NA	NA	NA	NA	Yes	Mesenchymal_Stem_Cell:Mesendoderm:hESC	7.4e-24	rs562338;rs531819;rs7419374:rs562338:rs60403635:rs562338;rs34601365;rs380240:rs375330151:rs71435594:rs531819:rs562338;rs531819:2:21277213_GCT_G:rs12618122:rs562338;rs7419374:rs562338;rs380240:rs34601365:rs368220458	5
ENSG00000084674	APOB	2	21224301	21266945	-1	protein_coding	338	APOB	5.49085e-16	-0.346892	13	8.1	273	1.23445e-15	1.88901e-24	GTEx/v8/Heart_Atrial_Appendage:GTEx/v8/Heart_Left_Ventricle	-	Yes	Liver:Mesendoderm:hESC	7.4e-24	rs531819;rs562338;rs60403635;rs7419374;rs34601365;rs380240;rs10177017;rs312045;rs71435594;rs12618122;rs7571647;rs1848922;rs7419374:rs562338:rs60403635:rs562338;rs380240:rs375330151:rs71435594:rs12618122:rs562338;rs7419374:rs562338;rs380240:rs34601365:rs368220458	5
ENSG00000218819	TDRD15	2	21346789	21366144	1	protein_coding	100129278	TDRD15	NA	NA	16	8.625	1	3.84105e-05	4.5811e-10	GTEx/v8/Liver	+	Yes	Left_Ventricle:Liver:Mesenchymal_Stem_Cell:Mesendoderm:Trophoblast-like_Cell:hESC	7.4e-24	rs562338;rs7419374;rs34601365;rs380240;rs375330151;rs12618122;rs531819;rs7419374:rs562338:rs60403635:rs562338;rs380240:rs375330151:rs71435594:rs562338;rs7419374:rs34601365:rs12618122:rs368220458:rs531819:rs562338;rs531819:2:21277213_GCT_G	5
ENSG00000119771	KLHL29	2	23608088	23931481	1	protein_coding	114818	KLHL29	NA	-0.399832	0	0	0	NA	NA	NA	NA	Yes	IMR90:Mesenchymal_Stem_Cell:Trophoblast-like_Cell	7.4e-24	rs531819:rs562338;rs531819:rs60403635:rs562338;rs531819;rs7419374:2:21277213_GCT_G:rs562338;rs7419374:rs562338;rs34601365;rs380240:rs34601365:rs12618122:rs368220458:rs375330151:rs562338:rs71435594:rs380240:rs380240;rs10177017:rs7419374:rs380240;rs7571647;rs1848922;rs10177017:rs7571647:rs10177017:rs312045:rs380240;rs312045;rs10177017:rs1848922:rs7571647;rs10177017	5
ENSG00000171094	ALK	2	29415640	30144432	-1	protein_coding	238	ALK	0.522363	-0.6249	0	0	0	NA	NA	NA	NA	Yes	Left_Ventricle	1.5e-22	rs77200710;rs4665985:rs67798437:rs77200710:2:27786252_CTTTTTTTTTT_C	6
ENSG00000213639	PPP1CB	2	28974506	29025806	1	protein_coding	5500	PPP1CB	0.997195	0.00183917	0	0	0	NA	NA	NA	NA	Yes	Adult_Cortex:IMR90:Mesenchymal_Stem_Cell:Mesendoderm:Trophoblast-like_Cell:hESC	1.9e-21	rs780110:rs77200710;2:28003616_TA_T:2:28003616_TA_T:rs67086575:rs77200710;rs4665985:rs67798437:rs77200710	6
ENSG00000163806	SPDYA	2	29005383	29073477	1	protein_coding	245711	SPDYA	0.166884	NA	0	0	0	NA	NA	NA	NA	Yes	IMR90:Mesenchymal_Stem_Cell:Mesendoderm:Trophoblast-like_Cell:hESC	1.9e-21	rs77200710;rs4665985:rs67798437:rs77200710:rs77200710;2:28003616_TA_T:2:28003616_TA_T	6
ENSG00000171103	TRMT61B	2	29072687	29093167	-1	protein_coding	55006	TRMT61B	4.00752e-06	-0.602142	0	0	0	NA	NA	NA	NA	Yes	Adult_Cortex:Fetal_Cortex:IMR90:Mesenchymal_Stem_Cell	1.9e-21	rs780110:rs77200710;2:28003616_TA_T:rs77200710;rs4665985:rs67798437	6
ENSG00000205334	AC074091.13	2	27928653	27938599	-1	protein_coding	100129995	LINC01460	NA	NA	4	12.09	0	NA	NA	NA	NA	Yes	Left_Ventricle:IMR90:Mesenchymal_Stem_Cell:Mesendoderm:Trophoblast-like_Cell:hESC	4.1e-14	rs77200710;2:28003616_TA_T	6
ENSG00000243147	MRPL33	2	27994584	28210954	1	protein_coding	9553	MRPL33	0.749165	-0.22013	6	14.77	0	NA	NA	NA	NA	Yes	Adult_Cortex:IMR90:Mesenchymal_Stem_Cell	4.1e-14	2:28003616_TA_T;rs77200710;2:28003616_TA_T:2:28003616_TA_T	6
ENSG00000171174	RBKS	2	28004231	28113965	-1	protein_coding	64080	RBKS	1.93198e-05	-0.689745	5	14.77	0	NA	NA	NA	NA	Yes	Aorta:Left_Ventricle:Liver:IMR90:Mesenchymal_Stem_Cell:Mesendoderm:Trophoblast-like_Cell:hESC	4.1e-14	2:28003616_TA_T;2:28003616_TA_T:rs77200710	6
ENSG00000158019	BRE	2	28112808	28561768	1	protein_coding	9577	BRE	0.279976	NA	1	5.473	0	NA	NA	NA	NA	Yes	Aorta:Left_Ventricle:Liver:IMR90:Mesenchymal_Stem_Cell:Mesendoderm:Trophoblast-like_Cell:hESC	4.1e-14	2:28003616_TA_T;2:28003616_TA_T:rs77200710	6
ENSG00000163811	WDR43	2	29117509	29171088	1	protein_coding	23160	WDR43	0.998942	1.45511	0	0	0	NA	NA	NA	NA	Yes	IMR90:Mesenchymal_Stem_Cell	4.1e-14	rs77200710;2:28003616_TA_T	6
ENSG00000157856	DRC1	2	26624784	26679579	1	protein_coding	92749	DRC1	1.30453e-10	0.353226	0	0	0	NA	NA	NA	NA	Yes	Adult_Cortex:Fetal_Cortex	1.1e-11	rs780110	6
ENSG00000213699	SLC35F6	2	26987152	27004099	1	protein_coding	54978	SLC35F6	0.0161308	-0.353051	0	0	0	NA	NA	NA	NA	Yes	Adult_Cortex:Fetal_Cortex	1.1e-11	rs780110	6
ENSG00000115163	CENPA	2	26987157	27023935	1	protein_coding	1058	CENPA	0.139975	-0.808381	0	0	0	NA	NA	NA	NA	Yes	Adult_Cortex:Fetal_Cortex	1.1e-11	rs780110	6
ENSG00000076003	MCM6	2	136597196	136633996	-1	protein_coding	4175	MCM6	0.998482	0.155095	40	13.46	199	2.72387e-21	7.54241e-16	GTEx/v8/Adipose_Subcutaneous:GTEx/v8/Adipose_Visceral_Omentum:GTEx/v8/Artery_Aorta:GTEx/v8/Artery_Coronary:GTEx/v8/Artery_Tibial:GTEx/v8/Heart_Atrial_Appendage:GTEx/v8/Heart_Left_Ventricle	+	Yes	GM12878:IMR90:Mesenchymal_Stem_Cell:Mesendoderm:hESC	2.2e-11	rs11681659;rs11399929;rs80261410;rs11399929:rs11681659;rs11399929:rs80261410:rs11681659;rs80261410:rs11681659	7
ENSG00000115866	DARS	2	136664247	136743670	-1	protein_coding	1615	DARS	0.000611999	0.123876	14	16.38	185	2.65762e-08	3.69417e-08	GTEx/v8/Adipose_Visceral_Omentum:GTEx/v8/Artery_Tibial:GTEx/v8/Heart_Left_Ventricle	+	Yes	GM12878:IMR90:Mesenchymal_Stem_Cell:Mesendoderm:Neural_Progenitor_Cell:hESC	2.2e-11	rs11681659;rs11399929;rs80261410;rs11399929:rs11399929:rs11681659;rs80261410:rs80261410:rs11681659	7
ENSG00000121966	CXCR4	2	136871919	136875735	-1	protein_coding	7852	CXCR4	0.427451	-0.284617	0	0	0	NA	NA	NA	NA	Yes	Promoter_anchored_loops:EP_correlation_cell_type_oneway:EP_correlation_organ_oneway:Adult_Cortex:Fetal_Cortex:Aorta:Left_Ventricle:Liver:Spleen:GM12878:IMR90:Mesenchymal_Stem_Cell:Mesendoderm:Neural_Progenitor_Cell:Trophoblast-like_Cell:hESC	2.2e-11	rs11681659;rs11399929:rs11681659;rs80261410:rs80261410:rs11399929:rs11681659	7
ENSG00000144224	UBXN4	2	136499189	136542625	1	protein_coding	23190	UBXN4	0.974206	-0.658501	51	20.7	166	6.82361e-08	6.12378e-06	GTEx/v8/Artery_Tibial:GTEx/v8/Pancreas	+	Yes	EP_correlation_cell_type_oneway:Adult_Cortex:Left_Ventricle:Liver:Spleen:GM12878:IMR90:Mesenchymal_Stem_Cell:Mesendoderm:Neural_Progenitor_Cell:Trophoblast-like_Cell:hESC	1.7e-10	rs11399929;rs11681659;rs80261410;rs11399929:rs11399929:rs11681659	7
ENSG00000144229	THSD7B	2	137523115	138435287	1	protein_coding	80731	THSD7B	5.65285e-06	NA	0	0	0	NA	NA	NA	NA	Yes	Mesendoderm:hESC	2.5e-10	rs11681659;rs11399929:rs11399929:rs11681659;rs80261410:rs80261410	7
ENSG00000150540	HNMT	2	138721590	138773930	1	protein_coding	3176	HNMT	0.0967294	0.562236	0	0	0	NA	NA	NA	NA	Yes	Mesenchymal_Stem_Cell	2.5e-10	rs11681659;rs11399929:rs11681659;rs80261410:rs80261410	7
ENSG00000144227	NXPH2	2	139428342	139537918	-1	protein_coding	11249	NXPH2	0.798014	NA	0	0	0	NA	NA	NA	NA	Yes	Mesenchymal_Stem_Cell	2.5e-10	rs11681659;rs11399929:rs11399929:rs11681659;rs80261410:rs80261410	7
ENSG00000143970	ASXL2	2	25956622	26101385	-1	protein_coding	55252	ASXL2	0.992739	NA	0	0	0	NA	NA	NA	NA	Yes	Fetal_Cortex	2.7e-09	rs780110	6
ENSG00000268412	AC013449.1	2	26251074	26251481	-1	protein_coding	NA	NA	NA	NA	0	0	0	NA	NA	NA	NA	Yes	Adult_Cortex	2.7e-09	rs780110	6
ENSG00000084733	RAB10	2	26256976	26360323	1	protein_coding	10890	RAB10	0.944405	-0.583905	0	0	0	NA	NA	NA	NA	Yes	Adult_Cortex	2.7e-09	rs780110	6
ENSG00000173567	GPR113	2	26531041	26569685	-1	protein_coding	165082	GPR113	1.48529e-10	0.291622	0	0	0	NA	NA	NA	NA	Yes	Fetal_Cortex	2.7e-09	rs780110	6
ENSG00000186143	C2orf53	2	27359723	27362278	-1	protein_coding	339779	C2orf53	1.54927e-09	0.624914	0	0	0	NA	NA	NA	NA	Yes	Promoter_anchored_loops:Fetal_Cortex	2.7e-09	rs780110	6
ENSG00000163792	TCF23	2	27371872	27376378	1	protein_coding	150921	TCF23	0.000503312	-0.683069	0	0	0	NA	NA	NA	NA	Yes	Promoter_anchored_loops	2.7e-09	rs780110	6
ENSG00000152128	TMEM163	2	135213330	135476570	-1	protein_coding	81615	TMEM163	0.0672625	0.397258	0	0	52	4.73418e-09	1.60223e-14	GTEx/v8/Artery_Aorta:GTEx/v8/Artery_Tibial	-	No	NA	5.8e-09	rs11681659;rs11399929	7
ENSG00000048991	R3HDM1	2	136289025	136482840	1	protein_coding	23518	R3HDM1	0.00602514	-0.983617	40	21	0	NA	NA	NA	NA	Yes	Promoter_anchored_loops:EP_correlation_cell_type_oneway:IMR90:Mesenchymal_Stem_Cell	5.8e-09	rs11681659;rs11399929	7
ENSG00000082258	CCNT2	2	135675805	135716912	1	protein_coding	905	CCNT2	0.498104	-1.29115	0	0	74	1.31669e-06	6.72446e-18	GTEx/v8/Adipose_Subcutaneous:GTEx/v8/Artery_Aorta	+	No	NA	1.7e-08	rs11399929;rs11681659	7
ENSG00000115839	RAB3GAP1	2	135809835	135933964	1	protein_coding	22930	RAB3GAP1	3.66101e-05	-0.439175	6	17.62	0	NA	NA	NA	NA	Yes	GM12878:IMR90:Mesenchymal_Stem_Cell:Mesendoderm:hESC	1.7e-08	rs11681659;rs11399929;rs11399929:rs11681659	7
ENSG00000121988	ZRANB3	2	135894486	136288806	-1	protein_coding	84083	ZRANB3	7.4264e-15	-0.51065	16	17.62	99	8.34853e-06	4.0053e-06	GTEx/v8/Artery_Tibial	-	Yes	Promoter_anchored_loops:IMR90:Mesenchymal_Stem_Cell	1.7e-08	rs11681659;rs11399929	7
ENSG00000115850	LCT	2	136545410	136594750	-1	protein_coding	3938	LCT	0.064255	0.129442	45	20.7	0	NA	NA	NA	NA	No	NA	2.3e-08	rs11399929;rs11681659	7
ENSG00000063660	GPC1	2	241375088	241407493	1	protein_coding	2817	GPC1	0.10957	1.27114	0	0	0	NA	NA	NA	NA	Yes	Adult_Cortex:Fetal_Cortex:IMR90:Mesenchymal_Stem_Cell:Mesendoderm:Trophoblast-like_Cell	2.5e-08	rs13424225	8
ENSG00000218416	AC110619.2	2	241388732	241396131	-1	protein_coding	NA	NA	NA	NA	0	0	0	NA	NA	NA	NA	Yes	IMR90:Mesenchymal_Stem_Cell:Mesendoderm:Trophoblast-like_Cell	2.5e-08	rs13424225	8
ENSG00000176601	MAP3K19	2	135722061	135805038	-1	protein_coding	80122	MAP3K19	3.69885e-14	0.125206	1	1.436	0	NA	NA	NA	NA	Yes	GM12878:IMR90:Mesenchymal_Stem_Cell:Mesendoderm:hESC	4.1e-08	rs11399929;rs11399929:rs11681659	7
ENSG00000183840	GPR39	2	133174147	133404132	1	protein_coding	2863	GPR39	1.54608e-12	-0.108894	0	0	0	NA	NA	NA	NA	Yes	Mesenchymal_Stem_Cell	1.6e-07	rs11399929	7
ENSG00000065802	ASB1	2	239335383	239360891	1	protein_coding	51665	ASB1	0.350836	1.49531	0	0	0	NA	NA	NA	NA	Yes	IMR90:Mesenchymal_Stem_Cell	3.7e-07	rs13424225	8
ENSG00000178602	OTOS	2	241078446	241083979	-1	protein_coding	150677	OTOS	2.7889e-07	1.21867	0	0	0	NA	NA	NA	NA	Yes	IMR90:Mesendoderm	3.7e-07	rs13424225	8
ENSG00000144504	ANKMY1	2	241418839	241508626	-1	protein_coding	51281	ANKMY1	7.81267e-14	NA	0	0	0	NA	NA	NA	NA	Yes	IMR90	3.7e-07	rs13424225	8
ENSG00000188542	DUSP28	2	241499471	241503431	1	protein_coding	285193	DUSP28	0.232217	0.425047	0	0	0	NA	NA	NA	NA	Yes	IMR90	3.7e-07	rs13424225	8
ENSG00000142327	RNPEPL1	2	241505221	241520789	1	protein_coding	57140	RNPEPL1	0.0279016	NA	0	0	0	NA	NA	NA	NA	Yes	IMR90	3.7e-07	rs13424225	8
ENSG00000226894	TMPRSS11BNL	4	69054242	69083798	-1	protein_coding	401136	TMPRSS11BNL	0.315777	0.704295	0	0	0	NA	NA	NA	NA	Yes	Mesenchymal_Stem_Cell:Mesendoderm:hESC	5.4e-16	rs2603187:rs386675580:rs9884390;rs2123886:rs2123886:rs9884390:rs1349849:rs35307342:rs4860987	9
ENSG00000185873	TMPRSS11B	4	69092371	69111438	-1	protein_coding	132724	TMPRSS11B	1.6805e-11	0.053189	0	0	0	NA	NA	NA	NA	Yes	Mesenchymal_Stem_Cell:Mesendoderm:hESC	5.4e-16	rs2603187:rs386675580:rs9884390;rs2123886:rs2123886:rs9884390:rs1349849:rs35307342:rs4860987	9
ENSG00000197888	UGT2B17	4	69402902	69434245	-1	protein_coding	7367	UGT2B17	0.0102556	0.903832	57	9.889	104	2.78097e-19	5.32642e-14	GTEx/v8/Liver:GTEx/v8/Pancreas	+	Yes	Liver	5.4e-16	rs9884390;rs4860987;rs386675580;rs2603187;rs2123886;rs1349849;rs35307342;rs4860987:rs35307342	9
ENSG00000109181	UGT2B10	4	69681711	69696914	1	protein_coding	7365	UGT2B10	5.50616e-15	NA	0	0	0	NA	NA	NA	NA	Yes	Left_Ventricle:Liver:Mesenchymal_Stem_Cell:Mesendoderm:hESC	5.4e-16	rs2603187:rs386675580:rs9884390;rs2123886:rs2123886:rs9884390:rs1349849:rs35307342:rs4860987	9
ENSG00000171234	UGT2B7	4	69917081	69978705	1	protein_coding	7364	UGT2B7	3.49679e-08	0.825006	0	0	0	NA	NA	NA	NA	Yes	IMR90:Mesenchymal_Stem_Cell:Mesendoderm:Trophoblast-like_Cell:hESC	5.4e-16	rs2603187:rs386675580:rs9884390;rs2123886:rs2123886:rs9884390:rs1349849:rs35307342:rs4860987	9
ENSG00000213759	UGT2B11	4	70065669	70080449	-1	protein_coding	10720	UGT2B11	3.1471e-13	0.706561	0	0	0	NA	NA	NA	NA	Yes	Promoter_anchored_loops:Left_Ventricle:Liver:GM12878:IMR90:Mesenchymal_Stem_Cell:Mesendoderm:Neural_Progenitor_Cell:Trophoblast-like_Cell:hESC	5.4e-16	rs2603187:rs9884390;rs2123886:rs1349849:rs386675580:rs2123886:rs9884390:rs35307342:rs4860987	9
ENSG00000135220	UGT2A3	4	69794181	69817509	-1	protein_coding	79799	UGT2A3	5.00169e-06	0.402338	0	0	0	NA	NA	NA	NA	Yes	Left_Ventricle:Mesenchymal_Stem_Cell:Mesendoderm:Trophoblast-like_Cell:hESC	7.7e-15	rs2603187:rs386675580:rs9884390;rs2123886:rs2123886:rs9884390:rs1349849:rs35307342	9
ENSG00000135226	UGT2B28	4	70146217	70160768	1	protein_coding	54490	UGT2B28	6.44396e-08	-0.0230075	0	0	0	NA	NA	NA	NA	Yes	Promoter_anchored_loops:Mesenchymal_Stem_Cell:Mesendoderm:hESC	7.7e-15	rs2603187:rs386675580:rs9884390;rs2123886:rs2123886:rs9884390:rs1349849:rs35307342	9
ENSG00000173610	UGT2A1	4	70454135	70518965	-1	protein_coding	10941	UGT2A1	2.73195e-11	-0.281771	0	0	0	NA	NA	NA	NA	Yes	Liver:Mesenchymal_Stem_Cell:Mesendoderm:Neural_Progenitor_Cell:hESC	7.7e-15	rs35307342:rs9884390:rs386675580:rs2603187:rs1349849:rs9884390;rs2123886:rs2123886	9
ENSG00000271271	UGT2A2	4	70454135	70505360	-1	protein_coding	574537	UGT2A2	2.32635e-07	-0.317105	0	0	0	NA	NA	NA	NA	Yes	Liver:Mesenchymal_Stem_Cell:Mesendoderm:Neural_Progenitor_Cell:hESC	7.7e-15	rs35307342:rs9884390:rs386675580:rs2603187:rs1349849:rs9884390;rs2123886:rs2123886	9
ENSG00000270386	UGT2A1	4	70454912	70518967	-1	protein_coding	10941	UGT2A1	NA	-0.281771	0	0	0	NA	NA	NA	NA	Yes	Liver:Mesenchymal_Stem_Cell:Mesendoderm:Neural_Progenitor_Cell:hESC	7.7e-15	rs35307342:rs9884390:rs386675580:rs2603187:rs1349849:rs9884390;rs2123886:rs2123886	9
ENSG00000083896	YTHDC1	4	69176105	69215807	-1	protein_coding	91746	YTHDC1	1	-1.32407	0	0	0	NA	NA	NA	NA	Yes	Mesenchymal_Stem_Cell	1.2e-13	rs2603187:rs386675580:rs9884390;rs2123886:rs2123886:rs9884390:rs1349849:rs35307342	9
ENSG00000087128	TMPRSS11E	4	69313167	69363322	1	protein_coding	28983	TMPRSS11E	3.75424e-05	0.26254	112	22.5	0	NA	NA	NA	NA	Yes	Mesenchymal_Stem_Cell:Mesendoderm:hESC	1.2e-13	rs386675580;rs2603187;rs1349849;rs9884390;rs2123886;rs35307342;rs2603187:rs386675580:rs9884390;rs2123886:rs2123886:rs9884390:rs1349849:rs35307342	9
ENSG00000156096	UGT2B4	4	70345883	70391732	-1	protein_coding	7363	UGT2B4	8.44719e-11	0.451804	0	0	0	NA	NA	NA	NA	Yes	IMR90:Mesenchymal_Stem_Cell:hESC	1.2e-13	rs2603187:rs386675580:rs9884390;rs2123886:rs2123886:rs9884390:rs1349849:rs35307342	9
ENSG00000196620	UGT2B15	4	69512348	69536346	-1	protein_coding	7366	UGT2B15	1.92099e-10	0.67733	0	0	0	NA	NA	NA	NA	Yes	Liver	NA	rs9884390:rs4860987	9
ENSG00000164398	ACSL6	5	131142683	131347936	-1	protein_coding	23305	ACSL6	0.0885623	-1.29258	0	0	16	0.000107859	0.000573997	GTEx/v8/Pancreas	+	Yes	IMR90:Mesendoderm	1.7e-10	5:131664516_TTATATA_T;rs272863;rs200800380:5:131664516_TTATATA_T:rs200800380	10
ENSG00000164400	CSF2	5	131409483	131411859	1	protein_coding	1437	CSF2	0.803849	-0.384982	0	0	0	NA	NA	NA	NA	Yes	GM12878:IMR90:Mesendoderm	1.7e-10	5:131664516_TTATATA_T:5:131664516_TTATATA_T;rs272863;rs200800380:rs200800380:rs272863	10
ENSG00000072682	P4HA2	5	131527531	131631008	-1	protein_coding	8974	P4HA2	6.46128e-05	-0.308598	27	18.28	151	3.21815e-27	2.11549e-31	GTEx/v8/Artery_Aorta:GTEx/v8/Artery_Coronary:GTEx/v8/Artery_Tibial:GTEx/v8/Pancreas	+	Yes	IMR90:Mesenchymal_Stem_Cell:Trophoblast-like_Cell	1.7e-10	5:131664516_TTATATA_T;rs272863;rs200800380;5:131664516_TTATATA_T:5:131664516_TTATATA_T;rs200800380:rs200800380:rs272863	10
ENSG00000131435	PDLIM4	5	131593364	131609147	1	protein_coding	8572	PDLIM4	0.924089	-0.0661677	17	18.28	151	4.24856e-20	6.02052e-16	GTEx/v8/Adipose_Subcutaneous:GTEx/v8/Adipose_Visceral_Omentum:GTEx/v8/Heart_Left_Ventricle:GTEx/v8/Pancreas	-	Yes	Adult_Cortex:Fetal_Cortex:GM12878:IMR90:Mesenchymal_Stem_Cell:Mesendoderm:Trophoblast-like_Cell:hESC	1.7e-10	5:131664516_TTATATA_T;rs272863;rs200800380;rs200800380:5:131664516_TTATATA_T:rs272863:rs200800380	10
ENSG00000197208	SLC22A4	5	131630136	131679899	1	protein_coding	6583	SLC22A4	4.64079e-06	-0.515619	83	13.88	151	2.7801e-09	6.7175e-07	GTEx/v8/Artery_Aorta	+	Yes	Adult_Cortex:Fetal_Cortex:IMR90:Mesenchymal_Stem_Cell:Trophoblast-like_Cell	1.7e-10	5:131664516_TTATATA_T;rs272863;rs200800380;rs200800380:5:131664516_TTATATA_T:rs200800380:rs272863	10
ENSG00000197375	SLC22A5	5	131705444	131731306	1	protein_coding	6584	SLC22A5	4.9e-09	0.858089	56	21.7	151	1.27641e-27	6.23252e-22	GTEx/v8/Adipose_Subcutaneous:GTEx/v8/Adipose_Visceral_Omentum:GTEx/v8/Artery_Aorta:GTEx/v8/Artery_Coronary:GTEx/v8/Artery_Tibial:GTEx/v8/Pancreas	-	Yes	Adult_Cortex:Fetal_Cortex:Left_Ventricle:GM12878:IMR90:Mesenchymal_Stem_Cell:Mesendoderm:Trophoblast-like_Cell:hESC	1.7e-10	5:131664516_TTATATA_T;rs272863;rs200800380;rs200800380:5:131664516_TTATATA_T:rs200800380	10
ENSG00000197536	C5orf56	5	131746328	131811736	1	protein_coding	441108	C5orf56	0.107649	NA	0	0	74	1.58901e-06	3.3657e-48	GTEx/v8/Artery_Aorta:GTEx/v8/Artery_Tibial:GTEx/v8/Heart_Atrial_Appendage	+	Yes	Adult_Cortex:GM12878:IMR90:Mesenchymal_Stem_Cell:Mesendoderm:Trophoblast-like_Cell:hESC	1.7e-10	5:131664516_TTATATA_T;rs272863;rs200800380;rs200800380:5:131664516_TTATATA_T:rs200800380:rs272863	10
ENSG00000125347	IRF1	5	131817301	131826490	-1	protein_coding	3659	IRF1	0.867789	0.555445	0	0	0	NA	NA	NA	NA	Yes	Promoter_anchored_loops:Adult_Cortex:Fetal_Cortex:Left_Ventricle:Liver:Psoas:Spleen:GM12878:IMR90:Mesenchymal_Stem_Cell:Mesendoderm:Trophoblast-like_Cell:hESC	1.7e-10	5:131664516_TTATATA_T:5:131664516_TTATATA_T;rs272863;rs200800380:rs272863:rs200800380	10
ENSG00000113525	IL5	5	131877136	131892530	-1	protein_coding	3567	IL5	0.0283744	-0.161789	0	0	0	NA	NA	NA	NA	Yes	Adult_Cortex:Liver:GM12878:IMR90:Mesenchymal_Stem_Cell:Mesendoderm:Trophoblast-like_Cell:hESC	1.7e-10	5:131664516_TTATATA_T;rs272863;rs200800380:5:131664516_TTATATA_T:rs272863:rs200800380	10
ENSG00000113522	RAD50	5	131891711	131980313	1	protein_coding	10111	RAD50	3.45028e-15	-1.01827	0	0	0	NA	NA	NA	NA	Yes	Adult_Cortex:Liver:GM12878:IMR90:Mesenchymal_Stem_Cell:Mesendoderm:Trophoblast-like_Cell:hESC	1.7e-10	5:131664516_TTATATA_T;rs272863;rs200800380:5:131664516_TTATATA_T:rs272863:rs200800380	10
ENSG00000169194	IL13	5	131991955	131996802	1	protein_coding	3596	IL13	0.0257147	0.123554	0	0	0	NA	NA	NA	NA	Yes	Fetal_Cortex:GM12878:IMR90:Mesenchymal_Stem_Cell	1.7e-10	5:131664516_TTATATA_T;rs272863;rs200800380:5:131664516_TTATATA_T:rs200800380:rs272863	10
ENSG00000113520	IL4	5	132009678	132018368	1	protein_coding	3565	IL4	0.168021	-0.00419523	0	0	0	NA	NA	NA	NA	Yes	Liver:GM12878:IMR90:Mesenchymal_Stem_Cell:Mesendoderm:Trophoblast-like_Cell:hESC	1.7e-10	5:131664516_TTATATA_T;rs272863;rs200800380:5:131664516_TTATATA_T:rs272863:rs200800380	10
ENSG00000131437	KIF3A	5	132028320	132073330	-1	protein_coding	11127	KIF3A	0.992416	-0.460356	0	0	5	7.98784e-05	1.44548e-23	GTEx/v8/Artery_Tibial	+	Yes	Liver:GM12878:IMR90:Mesenchymal_Stem_Cell:Mesendoderm	1.7e-10	5:131664516_TTATATA_T;rs272863;rs200800380:5:131664516_TTATATA_T:rs272863:rs200800380	10
ENSG00000205089	CCNI2	5	132083137	132089856	1	protein_coding	645121	CCNI2	4.53255e-05	0.828805	0	0	0	NA	NA	NA	NA	Yes	Adult_Cortex:Fetal_Cortex:Left_Ventricle:Liver:Spleen:GM12878:IMR90:Mesenchymal_Stem_Cell:Mesendoderm:Trophoblast-like_Cell:hESC	1.7e-10	5:131664516_TTATATA_T;rs272863;rs200800380:5:131664516_TTATATA_T:rs272863:rs200800380	10
ENSG00000164402	2008-09-01	5	132086509	132142933	-1	protein_coding	23176	2008-09-01	0.954286	NA	0	0	0	NA	NA	NA	NA	Yes	Adult_Cortex:Fetal_Cortex:Left_Ventricle:Liver:Spleen:GM12878:IMR90:Mesenchymal_Stem_Cell:Mesendoderm:Trophoblast-like_Cell:hESC	1.7e-10	5:131664516_TTATATA_T;rs272863;rs200800380:5:131664516_TTATATA_T:rs200800380:rs272863	10
ENSG00000198944	SOWAHA	5	132149033	132152488	1	protein_coding	134548	SOWAHA	NA	0.0656482	0	0	0	NA	NA	NA	NA	Yes	Adult_Cortex:Fetal_Cortex:Left_Ventricle:Liver:Spleen:GM12878:IMR90:Mesenchymal_Stem_Cell:Mesendoderm:Trophoblast-like_Cell:hESC	1.7e-10	5:131664516_TTATATA_T;rs272863;rs200800380:5:131664516_TTATATA_T:rs200800380:rs272863	10
ENSG00000164403	SHROOM1	5	132157833	132166590	-1	protein_coding	134549	SHROOM1	0.00959555	-0.760291	0	0	0	NA	NA	NA	NA	Yes	Promoter_anchored_loops:GM12878:IMR90:Mesenchymal_Stem_Cell:Mesendoderm	1.7e-10	5:131664516_TTATATA_T:5:131664516_TTATATA_T;rs272863;rs200800380:rs200800380:rs272863	10
ENSG00000164404	GDF9	5	132196873	132202576	-1	protein_coding	2661	GDF9	1.19472e-05	0.352488	0	0	0	NA	NA	NA	NA	Yes	Fetal_Cortex:Aorta:Hippocampus:Left_Ventricle:Liver:Right_Ventricle:Spleen:GM12878:IMR90:Mesenchymal_Stem_Cell:Mesendoderm:Trophoblast-like_Cell:hESC	1.7e-10	5:131664516_TTATATA_T;rs272863;rs200800380:5:131664516_TTATATA_T:rs272863:rs200800380	10
ENSG00000164405	UQCRQ	5	132202252	132203723	1	protein_coding	27089	UQCRQ	0.091913	-0.564493	0	0	0	NA	NA	NA	NA	Yes	Fetal_Cortex:Aorta:Hippocampus:Left_Ventricle:Liver:Right_Ventricle:Spleen:GM12878:IMR90:Mesenchymal_Stem_Cell:Mesendoderm:Trophoblast-like_Cell:hESC	1.7e-10	5:131664516_TTATATA_T;rs272863;rs200800380:5:131664516_TTATATA_T:rs272863:rs200800380	10
ENSG00000164406	LEAP2	5	132208014	132210738	1	protein_coding	116842	LEAP2	0.00789838	1.43845	0	0	0	NA	NA	NA	NA	Yes	Fetal_Cortex:Aorta:Hippocampus:Left_Ventricle:Liver:Right_Ventricle:Spleen:GM12878:IMR90:Mesenchymal_Stem_Cell:Mesendoderm:Trophoblast-like_Cell:hESC	1.7e-10	5:131664516_TTATATA_T;rs272863;rs200800380:5:131664516_TTATATA_T:rs272863:rs200800380	10
ENSG00000072364	AFF4	5	132211071	132299326	-1	protein_coding	27125	AFF4	0.999997	-1.86132	0	0	0	NA	NA	NA	NA	Yes	Adult_Cortex:Fetal_Cortex:GM12878:Mesenchymal_Stem_Cell	1.7e-10	5:131664516_TTATATA_T;rs272863;rs200800380:5:131664516_TTATATA_T:rs200800380:rs272863	10
ENSG00000213585	VDAC1	5	133307606	133340824	-1	protein_coding	7416	VDAC1	0.975595	-0.32609	0	0	0	NA	NA	NA	NA	Yes	Mesenchymal_Stem_Cell	1.7e-10	5:131664516_TTATATA_T;rs272863;rs200800380:5:131664516_TTATATA_T:rs200800380	10
ENSG00000113558	SKP1	5	133484633	133512729	-1	protein_coding	6500	SKP1	0.224831	2.13201	0	0	0	NA	NA	NA	NA	Yes	Mesenchymal_Stem_Cell	1.7e-10	5:131664516_TTATATA_T;rs272863;rs200800380:5:131664516_TTATATA_T:rs200800380:rs272863	10
ENSG00000155329	ZCCHC10	5	132332677	132362296	-1	protein_coding	54819	ZCCHC10	0.160802	-0.20978	0	0	0	NA	NA	NA	NA	Yes	Adult_Cortex:Fetal_Cortex:GM12878	6.7e-09	5:131664516_TTATATA_T;rs272863;rs200800380:5:131664516_TTATATA_T	10
ENSG00000170606	HSPA4	5	132387654	132442141	1	protein_coding	3308	HSPA4	0.999958	-0.0696306	0	0	0	NA	NA	NA	NA	Yes	Adult_Cortex:Fetal_Cortex:GM12878	6.7e-09	5:131664516_TTATATA_T;rs272863;rs200800380:5:131664516_TTATATA_T	10
ENSG00000158987	RAPGEF6	5	130759614	130970929	-1	protein_coding	51735	RAPGEF6	0.998026	-0.743539	0	0	10	0.000110428	5.68575e-08	GTEx/v8/Artery_Aorta:GTEx/v8/Artery_Tibial	-	No	NA	2.6e-08	5:131664516_TTATATA_T;rs272863	10
ENSG00000161904	LEMD2	6	33738979	33756913	-1	protein_coding	221496	LEMD2	0.302373	0.39292	0	0	0	NA	NA	NA	NA	Yes	Promoter_anchored_loops:IMR90:Mesenchymal_Stem_Cell	2.5e-09	rs59136961:rs114863007	11
ENSG00000272325	NUDT3	6	34247456	34360451	-1	protein_coding	11165	NUDT3	0.876817	0.134938	0	0	0	NA	NA	NA	NA	Yes	Adult_Cortex:Fetal_Cortex:Left_Ventricle:GM12878:IMR90:Mesenchymal_Stem_Cell:Mesendoderm:Trophoblast-like_Cell:hESC	2.5e-09	rs59136961:rs114863007	11
ENSG00000196821	C6orf106	6	34555065	34664636	-1	protein_coding	64771	C6orf106	0.45403	-1.13555	42	14.17	97	1.00433e-18	2.73886e-27	GTEx/v8/Adipose_Subcutaneous:GTEx/v8/Adipose_Visceral_Omentum:GTEx/v8/Artery_Aorta:GTEx/v8/Artery_Coronary:GTEx/v8/Artery_Tibial:GTEx/v8/Heart_Atrial_Appendage:GTEx/v8/Heart_Left_Ventricle:GTEx/v8/Liver:GTEx/v8/Pancreas	-	Yes	Adult_Cortex:GM12878:IMR90:Mesenchymal_Stem_Cell	2.5e-09	rs114863007;rs59136961;rs59136961:rs114863007:rs59136961	11
ENSG00000124562	SNRPC	6	34725183	34741571	1	protein_coding	6631	SNRPC	0.727262	-0.35112	17	15.81	97	4.04616e-11	1.95691e-18	GTEx/v8/Adipose_Subcutaneous:GTEx/v8/Artery_Tibial:GTEx/v8/Heart_Atrial_Appendage:GTEx/v8/Heart_Left_Ventricle:GTEx/v8/Pancreas	+	Yes	Promoter_anchored_loops:Adult_Cortex:Mesenchymal_Stem_Cell	2.5e-09	rs59136961;rs114863007;rs59136961:rs114863007	11
ENSG00000065060	UHRF1BP1	6	34759857	34850915	1	protein_coding	54887	UHRF1BP1	2.46541e-07	-0.830354	43	15.05	97	4.65612e-22	1.98454e-106	GTEx/v8/Adipose_Subcutaneous:GTEx/v8/Adipose_Visceral_Omentum:GTEx/v8/Artery_Aorta:GTEx/v8/Artery_Coronary:GTEx/v8/Artery_Tibial:GTEx/v8/Heart_Atrial_Appendage:GTEx/v8/Heart_Left_Ventricle:GTEx/v8/Pancreas	-	Yes	Promoter_anchored_loops:Adult_Cortex:Fetal_Cortex:GM12878:IMR90:Mesenchymal_Stem_Cell	2.5e-09	rs59136961;rs114863007;rs59136961:rs114863007:rs114863007	11
ENSG00000064995	TAF11	6	34845555	34855866	-1	protein_coding	6882	TAF11	0.875432	-0.232569	0	0	0	NA	NA	NA	NA	Yes	Promoter_anchored_loops:Fetal_Cortex:Left_Ventricle:Liver:GM12878:IMR90:Mesenchymal_Stem_Cell:Mesendoderm:Trophoblast-like_Cell:hESC	2.5e-09	rs59136961:rs114863007	11
ENSG00000064999	ANKS1A	6	34857042	35059179	1	protein_coding	23294	ANKS1A	0.84686	0.260683	0	0	0	NA	NA	NA	NA	Yes	Promoter_anchored_loops:Fetal_Cortex:Left_Ventricle:Liver:GM12878:IMR90:Mesenchymal_Stem_Cell:Mesendoderm:Trophoblast-like_Cell:hESC	2.5e-09	rs59136961:rs114863007	11
ENSG00000124678	TCP11	6	35085848	35116387	-1	protein_coding	6954	TCP11	4.00945e-05	-0.413536	0	0	0	NA	NA	NA	NA	Yes	Adult_Cortex:Aorta:Left_Ventricle:Liver:Lung:Right_Ventricle:Spleen:GM12878:IMR90:Mesenchymal_Stem_Cell:Mesendoderm:Neural_Progenitor_Cell:Trophoblast-like_Cell:hESC	2.5e-09	rs59136961:rs114863007:rs114863007;rs59136961	11
ENSG00000146197	SCUBE3	6	35182190	35220856	1	protein_coding	222663	SCUBE3	0.999984	-0.692415	0	0	0	NA	NA	NA	NA	Yes	Promoter_anchored_loops:Adult_Cortex:Fetal_Cortex:Left_Ventricle:Liver:IMR90:Mesenchymal_Stem_Cell:Mesendoderm:Trophoblast-like_Cell:hESC	2.5e-09	rs59136961:rs114863007	11
ENSG00000112514	CUTA	6	33384219	33386094	-1	protein_coding	51596	CUTA	1.14218e-05	-0.619996	0	0	0	NA	NA	NA	NA	Yes	Adult_Cortex	1.4e-08	rs114863007;rs59136961:rs114863007	11
ENSG00000197283	SYNGAP1	6	33387847	33421466	1	protein_coding	8831	SYNGAP1	0.999998	-1.10912	0	0	0	NA	NA	NA	NA	Yes	Adult_Cortex	1.4e-08	rs114863007;rs59136961:rs114863007	11
ENSG00000204188	GGNBP1	6	33551515	33556803	1	protein_coding	449520	GGNBP1	NA	NA	0	0	0	NA	NA	NA	NA	Yes	Adult_Cortex:Fetal_Cortex	1.4e-08	rs114863007;rs59136961:rs114863007:rs59136961	11
ENSG00000137288	UQCC2	6	33662070	33679504	-1	protein_coding	84300	UQCC2	0.0595477	0.254208	0	0	0	NA	NA	NA	NA	Yes	Adult_Cortex:Fetal_Cortex	1.4e-08	rs114863007;rs59136961:rs114863007	11
ENSG00000161896	IP6K3	6	33689444	33714762	-1	protein_coding	117283	IP6K3	0.0485339	1.72324	0	0	0	NA	NA	NA	NA	Yes	Left_Ventricle:IMR90:Mesenchymal_Stem_Cell	1.4e-08	rs114863007;rs59136961:rs59136961:rs114863007	11
ENSG00000096395	MLN	6	33762450	33771788	-1	protein_coding	4295	MLN	0.00165857	0.983258	0	0	0	NA	NA	NA	NA	Yes	Promoter_anchored_loops:IMR90:Mesenchymal_Stem_Cell	1.4e-08	rs59136961:rs114863007	11
ENSG00000124493	GRM4	6	33989628	34123399	-1	protein_coding	2914	GRM4	0.97935	-0.635219	0	0	0	NA	NA	NA	NA	Yes	Adult_Cortex:Fetal_Cortex:Spleen:IMR90:Mesenchymal_Stem_Cell:Mesendoderm	1.4e-08	rs59136961:rs114863007	11
ENSG00000186577	C6orf1	6	34214157	34217247	-1	protein_coding	221491	C6orf1	0.298719	-0.834304	0	0	0	NA	NA	NA	NA	Yes	Adult_Cortex:Fetal_Cortex	1.4e-08	rs59136961:rs114863007	11
ENSG00000270800	RPS10-NUDT3	6	34256547	34393825	-1	protein_coding	100529239	RPS10-NUDT3	NA	NA	0	0	0	NA	NA	NA	NA	Yes	IMR90:Mesenchymal_Stem_Cell:Mesendoderm:hESC	1.4e-08	rs114863007;rs59136961:rs59136961:rs114863007	11
ENSG00000124614	RPS10	6	34385231	34393902	-1	protein_coding	6204	RPS10	0.946463	0.204718	0	0	0	NA	NA	NA	NA	Yes	IMR90:Mesenchymal_Stem_Cell:Mesendoderm:hESC	1.4e-08	rs114863007;rs59136961:rs59136961:rs114863007	11
ENSG00000124507	PACSIN1	6	34433916	34503006	1	protein_coding	29993	PACSIN1	0.991339	-1.5939	0	0	0	NA	NA	NA	NA	Yes	Adult_Cortex:Fetal_Cortex:Left_Ventricle:Liver:Right_Ventricle:Spleen:GM12878:IMR90:Mesenchymal_Stem_Cell:Mesendoderm:Neural_Progenitor_Cell:Trophoblast-like_Cell:hESC	1.4e-08	rs114863007;rs59136961:rs59136961:rs114863007	11
ENSG00000124664	SPDEF	6	34505579	34524110	-1	protein_coding	25803	SPDEF	0.711825	-0.40704	0	0	0	NA	NA	NA	NA	Yes	Promoter_anchored_loops:IMR90:Mesenchymal_Stem_Cell:Mesendoderm:hESC	1.4e-08	rs114863007;rs59136961:rs59136961:rs114863007	11
ENSG00000065029	ZNF76	6	35226686	35263762	1	protein_coding	7629	ZNF76	5.07289e-16	0.397539	0	0	0	NA	NA	NA	NA	Yes	Promoter_anchored_loops:IMR90:Mesenchymal_Stem_Cell	1.4e-08	rs59136961:rs114863007:rs114863007;rs59136961	11
ENSG00000096060	FKBP5	6	35541362	35696360	-1	protein_coding	2289	FKBP5	0.498849	-0.767039	0	0	0	NA	NA	NA	NA	Yes	Fetal_Cortex	1.4e-08	rs114863007;rs59136961:rs114863007	11
ENSG00000112079	STK38	6	36461669	36515247	-1	protein_coding	11329	STK38	0.853295	-0.412586	0	0	0	NA	NA	NA	NA	Yes	Adult_Cortex	1.4e-08	rs114863007;rs59136961:rs114863007	11
ENSG00000137392	CLPS	6	35762759	35765088	-1	protein_coding	1208	CLPS	0.0562748	0.768245	0	0	0	NA	NA	NA	NA	Yes	Adult_Cortex	3.7e-07	rs59136961:rs114863007;rs59136961	11
ENSG00000023892	DEF6	6	35265595	35289548	1	protein_coding	50619	DEF6	0.976824	0.153811	0	0	0	NA	NA	NA	NA	Yes	Promoter_anchored_loops	1e-06	rs59136961	11
ENSG00000112041	TULP1	6	35465651	35480715	-1	protein_coding	7287	TULP1	0.807904	-0.139077	0	0	0	NA	NA	NA	NA	Yes	Promoter_anchored_loops	1.1e-06	rs59136961	11
ENSG00000172461	FUT9	6	96463860	96663488	1	protein_coding	10690	FUT9	0.0813712	5.37195	0	0	0	NA	NA	NA	NA	Yes	Left_Ventricle	3e-06	rs6931604	12
ENSG00000184486	POU3F2	6	99282580	99286660	1	protein_coding	5454	POU3F2	NA	-0.73881	0	0	0	NA	NA	NA	NA	Yes	Mesendoderm	3e-06	rs6931604	12
ENSG00000196313	POM121	7	72349936	72421979	1	protein_coding	9883	POM121	NA	-1.37062	0	0	57	8.97114e-08	1.50688e-66	GTEx/v8/Adipose_Subcutaneous:GTEx/v8/Artery_Aorta:GTEx/v8/Artery_Tibial	-	Yes	Promoter_anchored_loops	3.1e-11	rs138574868;rs62466318;rs33951980;rs62466318:rs33951980:rs62466318	15
ENSG00000130305	NSUN5	7	72716514	72722864	-1	protein_coding	55695	NSUN5	1.45415e-06	-0.276519	0	0	0	NA	NA	NA	NA	Yes	Promoter_anchored_loops:Spleen:IMR90:Mesenchymal_Stem_Cell:Mesendoderm	3.1e-11	rs33951980:rs138574868;rs62466318:rs138574868:rs62466318	15
ENSG00000009954	BAZ1B	7	72854728	72936608	-1	protein_coding	9031	BAZ1B	1	-1.10698	35	8.812	0	NA	NA	NA	NA	Yes	Promoter_anchored_loops:Adult_Cortex:Fetal_Cortex:GM12878:IMR90:Mesenchymal_Stem_Cell:Mesendoderm:Trophoblast-like_Cell:hESC	3.1e-11	rs33951980;rs138574868;rs62466318;rs138574868:rs33951980:rs138574868;rs62466318:rs62466318	15
ENSG00000106635	BCL7B	7	72950686	72972332	-1	protein_coding	9275	BCL7B	0.706637	-0.386261	15	14.54	67	2.54871e-06	3.40292e-13	GTEx/v8/Adipose_Subcutaneous:GTEx/v8/Artery_Aorta:GTEx/v8/Artery_Tibial	-	Yes	Promoter_anchored_loops:Adult_Cortex:Fetal_Cortex	3.1e-11	rs138574868;rs33951980;rs62466318;rs62466318:rs33951980	15
ENSG00000106638	TBL2	7	72983262	72993121	-1	protein_coding	26608	TBL2	0.00437651	8.9213	30	10.3	45	1.29213e-05	4.93874e-46	GTEx/v8/Artery_Tibial:GTEx/v8/Heart_Atrial_Appendage	+	No	NA	3.1e-11	rs138574868;rs33951980;rs62466318	15
ENSG00000009950	MLXIPL	7	73007524	73038873	-1	protein_coding	51085	MLXIPL	0.676823	0.477224	61	19.09	109	5.28937e-28	1.10979e-22	GTEx/v8/Adipose_Subcutaneous:GTEx/v8/Adipose_Visceral_Omentum:GTEx/v8/Heart_Atrial_Appendage:GTEx/v8/Heart_Left_Ventricle:GTEx/v8/Pancreas	-	Yes	Promoter_anchored_loops:EP_correlation_cell_type_oneway:Adult_Cortex	3.1e-11	rs138574868;rs62466318;rs33951980;rs33951980:rs138574868	15
ENSG00000176428	VPS37D	7	73082155	73086442	1	protein_coding	155382	VPS37D	0.656347	NA	0	0	35	3.82464e-07	1.34286e-08	GTEx/v8/Adipose_Subcutaneous:GTEx/v8/Adipose_Visceral_Omentum:GTEx/v8/Artery_Aorta	-	Yes	Promoter_anchored_loops:Adult_Cortex:Fetal_Cortex	3.1e-11	rs138574868;rs62466318;rs33951980;rs138574868:rs33951980:rs138574868;rs62466318:rs138574868;rs33951980:rs62466318	15
ENSG00000106089	STX1A	7	73113536	73134002	-1	protein_coding	6804	STX1A	0.910476	-0.0705192	0	0	0	NA	NA	NA	NA	Yes	Promoter_anchored_loops	3.1e-11	rs138574868;rs62466318:rs33951980	15
ENSG00000165171	WBSCR27	7	73248920	73256865	-1	protein_coding	155368	WBSCR27	0.0679117	NA	0	0	0	NA	NA	NA	NA	Yes	Promoter_anchored_loops	3.1e-11	rs138574868:rs33951980:rs138574868;rs62466318	15
ENSG00000106683	LIMK1	7	73497263	73536855	1	protein_coding	3984	LIMK1	0.990896	-0.781218	0	0	0	NA	NA	NA	NA	Yes	Adult_Cortex:Fetal_Cortex	3.1e-11	rs33951980:rs138574868;rs62466318	15
ENSG00000106665	CLIP2	7	73703805	73820273	1	protein_coding	7461	CLIP2	0.999882	0.252234	0	0	0	NA	NA	NA	NA	Yes	Adult_Cortex	3.1e-11	rs33951980:rs138574868;rs62466318	15
ENSG00000106077	ABHD11	7	73150424	73153197	-1	protein_coding	83451	ABHD11	9.03291e-06	0.148518	0	0	0	NA	NA	NA	NA	Yes	Promoter_anchored_loops	4e-11	rs33951980:rs138574868;rs62466318:rs138574868;rs62466318;rs33951980:rs62466318;rs33951980	15
ENSG00000165215	CLDN3	7	73183328	73184600	-1	protein_coding	1365	CLDN3	0.678537	-0.798793	0	0	0	NA	NA	NA	NA	Yes	EP_correlation_cell_type_oneway	4e-11	rs138574868;rs62466318	15
ENSG00000106682	EIF4H	7	73588575	73611431	1	protein_coding	7458	EIF4H	0.922545	-1.50043	0	0	0	NA	NA	NA	NA	Yes	Promoter_anchored_loops:Adult_Cortex	5.2e-11	rs33951980:rs138574868;rs62466318	15
ENSG00000146755	TRIM50	7	72726535	72742085	-1	protein_coding	135892	TRIM50	2.72562e-06	-0.790239	0	0	0	NA	NA	NA	NA	Yes	EP_correlation_cell_type_oneway:Spleen:IMR90:Mesenchymal_Stem_Cell:Mesendoderm	1.8e-10	rs33951980:rs138574868;rs62466318:rs138574868:rs62466318	15
ENSG00000077800	FKBP6	7	72742167	72772634	1	protein_coding	8468	FKBP6	0.130601	-0.334522	0	0	0	NA	NA	NA	NA	Yes	EP_correlation_cell_type_oneway:Spleen:IMR90:Mesenchymal_Stem_Cell:Mesendoderm	1.8e-10	rs33951980:rs138574868;rs62466318:rs138574868:rs62466318	15
ENSG00000188763	FZD9	7	72848109	72850450	1	protein_coding	8326	FZD9	NA	NA	4	3.057	0	NA	NA	NA	NA	Yes	Promoter_anchored_loops:GM12878:IMR90:Mesenchymal_Stem_Cell:Mesendoderm:Trophoblast-like_Cell:hESC	1.8e-10	rs33951980;rs138574868;rs62466318;rs33951980:rs138574868;rs62466318:rs138574868:rs62466318	15
ENSG00000049541	RFC2	7	73645829	73668774	-1	protein_coding	5982	RFC2	4.04213e-05	-0.396976	0	0	0	NA	NA	NA	NA	Yes	Adult_Cortex:Fetal_Cortex	1.8e-10	rs33951980:rs138574868;rs62466318	15
ENSG00000175877	WBSCR28	7	73275489	73280223	1	protein_coding	135886	WBSCR28	1.58801e-06	0.424364	0	0	0	NA	NA	NA	NA	Yes	Adult_Cortex	2.2e-10	rs138574868;rs62466318:rs33951980	15
ENSG00000086730	LAT2	7	73613982	73644161	1	protein_coding	7462	LAT2	0.000691063	-0.479097	0	0	0	NA	NA	NA	NA	Yes	Promoter_anchored_loops	2.3e-10	rs33951980:rs62466318	15
ENSG00000105953	OGDH	7	44646171	44748665	1	protein_coding	4967	OGDH	0.993695	-0.0701961	0	0	0	NA	NA	NA	NA	Yes	Promoter_anchored_loops:GM12878:IMR90:Mesenchymal_Stem_Cell	1.6e-09	rs73109460	14
ENSG00000122515	ZMIZ2	7	44788180	44809477	1	protein_coding	83637	ZMIZ2	0.99962	0.416826	17	8.079	19	3.30135e-13	8.21167e-09	GTEx/v8/Adipose_Subcutaneous:GTEx/v8/Adipose_Visceral_Omentum:GTEx/v8/Pancreas	+	No	NA	1.6e-09	rs73109460	14
ENSG00000196262	PPIA	7	44836279	44864163	1	protein_coding	5478	PPIA	0.808049	0.430905	0	0	12	1.56786e-05	2.29167e-05	GTEx/v8/Pancreas	+	Yes	Promoter_anchored_loops:Adult_Cortex:Fetal_Cortex	1.6e-09	rs73109460	14
ENSG00000146676	PURB	7	44915896	44924960	-1	protein_coding	5814	PURB	0.605935	-2.57194	0	0	0	NA	NA	NA	NA	Yes	Adult_Cortex:Fetal_Cortex	1.6e-09	rs73109460	14
ENSG00000136270	TBRG4	7	45139699	45151646	-1	protein_coding	9238	TBRG4	0.78094	-0.259398	0	0	0	NA	NA	NA	NA	Yes	Adult_Cortex	1.6e-09	rs73109460	14
ENSG00000155428	TRIM74	7	72430016	72439997	-1	protein_coding	378108	TRIM74	0.780334	-0.947438	0	0	0	NA	NA	NA	NA	Yes	Promoter_anchored_loops	8.8e-09	rs33951980:rs138574868;rs62466318	15
ENSG00000240230	COX19	7	938415	1015235	-1	protein_coding	90639	COX19	0.000108651	1.39868	0	0	0	NA	NA	NA	NA	Yes	Adult_Cortex:Fetal_Cortex:GM12878:IMR90:Mesenchymal_Stem_Cell:Mesendoderm:Trophoblast-like_Cell	3.4e-08	rs35177659	13
ENSG00000073067	CYP2W1	7	1022835	1029276	1	protein_coding	54905	CYP2W1	0.000980916	NA	0	0	0	NA	NA	NA	NA	Yes	Promoter_anchored_loops:GM12878:IMR90:Mesenchymal_Stem_Cell:Mesendoderm:Trophoblast-like_Cell	3.4e-08	rs35177659	13
ENSG00000146540	C7orf50	7	1036622	1177896	-1	protein_coding	84310	C7orf50	0.00139621	1.0724	0	0	18	1.22195e-06	0.000318302	GTEx/v8/Pancreas	+	Yes	Promoter_anchored_loops:Adult_Cortex:Fetal_Cortex:IMR90:Mesenchymal_Stem_Cell	3.4e-08	rs35177659	13
ENSG00000164849	GPR146	7	1084212	1098897	1	protein_coding	115330	GPR146	0.00279413	0.3554	0	0	12	5.26182e-06	0.00544126	GTEx/v8/Adipose_Visceral_Omentum:GTEx/v8/Pancreas	+	Yes	Adult_Cortex:Fetal_Cortex:IMR90	3.4e-08	rs35177659	13
ENSG00000164850	GPER1	7	1121844	1133451	1	protein_coding	2852	GPER1	0.725421	0.809124	0	0	19	3.10333e-14	2.1766e-19	GTEx/v8/Adipose_Subcutaneous:GTEx/v8/Adipose_Visceral_Omentum:GTEx/v8/Artery_Aorta	+	Yes	Promoter_anchored_loops:Spleen:GM12878:IMR90:Mesenchymal_Stem_Cell	3.4e-08	rs35177659	13
ENSG00000178381	ZFAND2A	7	1191707	1200395	-1	protein_coding	90637	ZFAND2A	0.000389857	NA	6	4.984	19	2.92911e-29	2.41505e-56	GTEx/v8/Adipose_Subcutaneous:GTEx/v8/Adipose_Visceral_Omentum:GTEx/v8/Artery_Aorta:GTEx/v8/Artery_Coronary:GTEx/v8/Artery_Tibial:GTEx/v8/Heart_Atrial_Appendage:GTEx/v8/Heart_Left_Ventricle:GTEx/v8/Pancreas	+	Yes	Adult_Cortex:IMR90:Mesenchymal_Stem_Cell	3.4e-08	rs35177659	13
ENSG00000164853	UNCX	7	1272543	1276954	1	protein_coding	340260	UNCX	NA	NA	0	0	0	NA	NA	NA	NA	Yes	IMR90	3.4e-08	rs35177659	13
ENSG00000136271	DDX56	7	44605016	44614650	-1	protein_coding	54606	DDX56	3.51574e-06	-0.60494	0	0	0	NA	NA	NA	NA	Yes	GM12878:IMR90:Mesenchymal_Stem_Cell	6.8e-08	rs73109460	14
ENSG00000158604	TMED4	7	44617493	44621886	-1	protein_coding	222068	TMED4	0.292928	0.480385	0	0	0	NA	NA	NA	NA	Yes	GM12878:IMR90:Mesenchymal_Stem_Cell	6.8e-08	rs73109460	14
ENSG00000164877	MICALL2	7	1468101	1499138	-1	protein_coding	79778	MICALL2	7.76189e-17	NA	0	0	0	NA	NA	NA	NA	Yes	Promoter_anchored_loops	4.3e-07	rs35177659	13
ENSG00000164880	INTS1	7	1509913	1545489	-1	protein_coding	26173	INTS1	0.224121	NA	0	0	0	NA	NA	NA	NA	Yes	Promoter_anchored_loops	4.3e-07	rs35177659	13
ENSG00000147687	TATDN1	8	125500726	125551699	-1	protein_coding	83940	TATDN1	1.72641e-08	0.357863	0	0	0	NA	NA	NA	NA	Yes	Liver:GM12878:IMR90:Mesenchymal_Stem_Cell	2.3e-32	rs112875651;rs2954021:rs33924196:rs33924196;8:126492843_GT_G:rs35309034;rs12674939:rs2954021:rs72655677:8:126492843_GT_G:rs35309034:8:126504383_CCACCAT_C:rs112875651:8:126511216_GA_G:rs4360309	18
ENSG00000147684	NDUFB9	8	125551344	125580751	1	protein_coding	4715	NDUFB9	0.0428894	-0.0165872	0	0	0	NA	NA	NA	NA	Yes	Liver:GM12878:IMR90:Mesenchymal_Stem_Cell	2.3e-32	rs112875651;rs2954021:rs33924196:rs33924196;8:126492843_GT_G:rs35309034;rs12674939:rs2954021:rs72655677:8:126492843_GT_G:rs35309034:8:126504383_CCACCAT_C:rs112875651:8:126511216_GA_G:rs4360309	18
ENSG00000180938	ZNF572	8	125985540	125991631	1	protein_coding	137209	ZNF572	0.000651451	-0.137914	0	0	0	NA	NA	NA	NA	Yes	Liver	2.3e-32	rs112875651;rs2954021:rs33924196:rs33924196;8:126492843_GT_G:rs35309034;rs12674939:rs2954021:rs72655677:8:126492843_GT_G:rs35309034:8:126504383_CCACCAT_C:rs112875651:8:126511216_GA_G	18
ENSG00000104549	SQLE	8	126010739	126034525	1	protein_coding	6713	SQLE	0.912971	1.17169	0	0	0	NA	NA	NA	NA	Yes	Liver:GM12878:IMR90:Mesenchymal_Stem_Cell:Mesendoderm:Trophoblast-like_Cell:hESC	2.3e-32	rs4360309:rs112875651;rs2954021:rs33924196:rs33924196;8:126492843_GT_G:rs35309034;rs12674939:rs2954021:rs72655677:8:126492843_GT_G:rs35309034:8:126504383_CCACCAT_C:rs112875651:8:126511216_GA_G	18
ENSG00000164961	KIAA0196	8	126036502	126104082	-1	protein_coding	9897	KIAA0196	4.81025e-13	-0.762157	0	0	0	NA	NA	NA	NA	Yes	Left_Ventricle:Liver:Pancreas:GM12878:IMR90:Mesenchymal_Stem_Cell:Mesendoderm:Trophoblast-like_Cell:hESC	2.3e-32	rs112875651;rs2954021:rs33924196:rs33924196;8:126492843_GT_G:rs35309034;rs12674939:rs2954021:rs72655677:8:126492843_GT_G:rs35309034:8:126504383_CCACCAT_C:rs112875651:8:126511216_GA_G:rs4360309	18
ENSG00000156831	NSMCE2	8	126103921	126379362	1	protein_coding	286053	NSMCE2	0.0724507	-0.471934	0	0	0	NA	NA	NA	NA	Yes	Left_Ventricle:Liver:Pancreas:GM12878:IMR90:Mesenchymal_Stem_Cell:Mesendoderm:Trophoblast-like_Cell:hESC	2.3e-32	rs112875651;rs2954021:rs33924196:rs33924196;8:126492843_GT_G:rs35309034;rs12674939:rs2954021:rs72655677:8:126492843_GT_G:rs35309034:8:126504383_CCACCAT_C:rs112875651:8:126511216_GA_G:rs4360309	18
ENSG00000136997	MYC	8	128747680	128753674	1	protein_coding	4609	MYC	NA	-0.253125	0	0	0	NA	NA	NA	NA	Yes	Left_Ventricle	2.3e-32	rs112875651;rs2954021:rs33924196:rs33924196;8:126492843_GT_G:rs35309034;rs12674939:rs2954021:rs72655677:8:126492843_GT_G:rs35309034:8:126504383_CCACCAT_C:rs112875651:8:126511216_GA_G	18
ENSG00000147324	MFHAS1	8	8640864	8751155	-1	protein_coding	9258	MFHAS1	2.2282e-05	0.955184	0	0	0	NA	NA	NA	NA	Yes	Adult_Cortex:Mesendoderm:Trophoblast-like_Cell	4.9e-17	rs9987289;rs7357361:rs10102352:rs7357361:rs7012637:rs9987289:rs34290760:rs9987289;rs7357361;rs7008413	16
ENSG00000104626	ERI1	8	8859657	8974256	1	protein_coding	90459	ERI1	0.000454685	0.94936	0	0	25	1.7192e-06	1.58151e-06	GTEx/v8/Artery_Aorta	+	Yes	Adult_Cortex:Fetal_Cortex:Mesenchymal_Stem_Cell:Mesendoderm:Trophoblast-like_Cell:hESC	4.9e-17	rs9987289;rs7357361;rs7008413;rs9987289:rs9987289;rs7357361:rs34290760:rs9987289;rs7008413:rs10102352:rs7357361:rs7357361;rs7008413:rs7008413:rs7012637	16
ENSG00000173281	PPP1R3B	8	8993765	9009084	-1	protein_coding	79660	PPP1R3B	0.0229191	3.70853	0	0	0	NA	NA	NA	NA	Yes	Mesendoderm	4.9e-17	rs7012637:rs9987289:rs9987289;rs7357361:rs34290760:rs9987289;rs7357361;rs7008413	16
ENSG00000253426	RP11-10A14.4	8	9009252	9025646	1	protein_coding	NA	NA	NA	NA	0	0	0	NA	NA	NA	NA	Yes	Mesendoderm	4.9e-17	rs7012637:rs9987289:rs9987289;rs7357361:rs34290760:rs9987289;rs7357361;rs7008413	16
ENSG00000173273	TNKS	8	9413424	9639856	1	protein_coding	8658	TNKS	0.777116	1.63727	0	0	15	7.43105e-08	0.00127623	GTEx/v8/Liver	+	Yes	Mesenchymal_Stem_Cell:Mesendoderm:hESC	4.9e-17	rs7012637;rs9987289;rs7357361;rs7012637:rs9987289:rs9987289;rs7357361:rs34290760:rs9987289;rs7008413:rs7357361:rs10102352:rs7357361;rs7008413:rs7008413	16
ENSG00000171044	XKR6	8	10753555	11058875	-1	protein_coding	286046	XKR6	0.956777	0.199431	0	0	0	NA	NA	NA	NA	Yes	IMR90	4.9e-17	rs7012637:rs9987289:rs9987289;rs7357361:rs34290760:rs9987289;rs7357361;rs7008413	16
ENSG00000189376	C8orf76	8	124232196	124253638	-1	protein_coding	84933	C8orf76	1.71944e-05	-0.0200729	0	0	0	NA	NA	NA	NA	Yes	Left_Ventricle	4.6e-13	rs4360309	18
ENSG00000259305	ZHX1-C8ORF76	8	124238431	124279627	-1	protein_coding	100533106	ZHX1-C8ORF76	0.00105203	-0.368023	0	0	0	NA	NA	NA	NA	Yes	Left_Ventricle	4.6e-13	rs4360309	18
ENSG00000170881	RNF139	8	125486979	125500155	1	protein_coding	11236	RNF139	0.0608738	-0.469221	0	0	0	NA	NA	NA	NA	Yes	Left_Ventricle	4.6e-13	rs4360309	18
ENSG00000173334	TRIB1	8	126442563	126450647	1	protein_coding	10221	TRIB1	0.606588	-0.456914	11	6.894	0	NA	NA	NA	NA	Yes	Promoter_anchored_loops	4.6e-13	rs4871598;rs12674939;rs4360309	18
ENSG00000175445	LPL	8	19759228	19824769	1	protein_coding	4023	LPL	3.33728e-06	1.04718	23	50	0	NA	NA	NA	NA	Yes	Promoter_anchored_loops:IMR90:Mesenchymal_Stem_Cell:Mesendoderm:Trophoblast-like_Cell:hESC	5e-09	rs117026536	17
ENSG00000104611	SH2D4A	8	19171128	19253729	1	protein_coding	63898	SH2D4A	1.53114e-18	-0.0833182	0	0	0	NA	NA	NA	NA	Yes	Mesenchymal_Stem_Cell	9.9e-09	rs117026536	17
ENSG00000147408	CSGALNACT1	8	19261672	19615540	-1	protein_coding	55790	CSGALNACT1	6.87751e-05	0.406271	0	0	0	NA	NA	NA	NA	Yes	Mesenchymal_Stem_Cell	9.9e-09	rs117026536	17
ENSG00000104613	INTS10	8	19674651	19709594	1	protein_coding	55174	INTS10	0.984217	NA	0	0	0	NA	NA	NA	NA	Yes	Mesenchymal_Stem_Cell:Mesendoderm:hESC	9.9e-09	rs117026536	17
ENSG00000036565	SLC18A1	8	20002366	20040717	-1	protein_coding	6570	SLC18A1	1.88883e-14	0.247528	0	0	0	NA	NA	NA	NA	Yes	EP_correlation_cell_type_oneway:Mesenchymal_Stem_Cell	9.9e-09	rs117026536	17
ENSG00000147416	ATP6V1B2	8	20054878	20084330	1	protein_coding	526	ATP6V1B2	0.991449	-0.74185	0	0	0	NA	NA	NA	NA	Yes	Mesenchymal_Stem_Cell	9.9e-09	rs117026536	17
ENSG00000156011	PSD3	8	18384811	18942240	-1	protein_coding	23362	PSD3	0.851706	1.35431	0	0	0	NA	NA	NA	NA	Yes	Aorta	2.3e-08	rs117026536	17
ENSG00000156006	NAT2	8	18248755	18258728	1	protein_coding	10	NAT2	0.0226079	0.267315	0	0	0	NA	NA	NA	NA	Yes	Left_Ventricle	4.7e-07	rs117026536	17
ENSG00000165029	ABCA1	9	107543283	107690518	-1	protein_coding	19	ABCA1	0.0016588	0.0827742	6	15.09	0	NA	NA	NA	NA	Yes	Adult_Cortex:Fetal_Cortex	3.3e-08	rs1800978	19
ENSG00000070214	SLC44A1	9	108006903	108201452	1	protein_coding	23446	SLC44A1	0.999254	-0.569151	0	0	0	NA	NA	NA	NA	Yes	Adult_Cortex:Fetal_Cortex:IMR90:Mesenchymal_Stem_Cell:Mesendoderm:hESC	3.3e-08	rs1800978	19
ENSG00000106701	FSD1L	9	108210077	108314714	1	protein_coding	83856	FSD1L	NA	NA	0	0	0	NA	NA	NA	NA	Yes	Adult_Cortex:Fetal_Cortex:Left_Ventricle:IMR90:Mesenchymal_Stem_Cell:Mesendoderm:Trophoblast-like_Cell:hESC	3.3e-08	rs1800978	19
ENSG00000186051	TAL2	9	108424738	108425367	1	protein_coding	6887	TAL2	0.488535	0.0933639	0	0	0	NA	NA	NA	NA	Yes	Mesendoderm	3.3e-08	rs1800978	19
ENSG00000171988	JMJD1C	10	64926981	65225722	-1	protein_coding	221037	JMJD1C	1	-0.552974	181	20.3	0	NA	NA	NA	NA	Yes	Adult_Cortex:Fetal_Cortex:Aorta:Dorsolateral_Prefrontal_Cortex:Hippocampus:Left_Ventricle:Liver:Right_Ventricle:GM12878:IMR90:Mesenchymal_Stem_Cell:Mesendoderm:Neural_Progenitor_Cell:Trophoblast-like_Cell:hESC	4.1e-19	rs149727843;rs141929745;rs7924036;rs34124994;rs557044785;10:64982989_GT_G;rs764351876;rs201220977;10:65036225_CA_C;rs141929745:rs7924036;rs557044785:rs7924036:rs7924036;rs34124994:rs7924036;rs557044785:rs141929745:rs34030237;rs746973976:rs746973976:10:65036225_CA_C:rs7924036;rs201220977:rs201220977:rs149727843:10:65262396_CA_C:rs34030237:10:64982989_GT_G:rs764351876:rs34124994:rs557044785	21
ENSG00000165476	REEP3	10	65281123	65384883	1	protein_coding	221035	REEP3	0.0129813	1.39842	132	15.42	307	1.20408e-15	1.80417e-13	GTEx/v8/Adipose_Subcutaneous:GTEx/v8/Adipose_Visceral_Omentum:GTEx/v8/Artery_Aorta:GTEx/v8/Artery_Tibial:GTEx/v8/Heart_Left_Ventricle	+	Yes	Promoter_anchored_loops:Aorta:Left_Ventricle:Liver:GM12878:IMR90:Mesenchymal_Stem_Cell:Mesendoderm:Trophoblast-like_Cell:hESC	4.1e-19	rs7924036;rs34124994;rs557044785;rs149727843;rs141929745;rs34030237;rs746973976;rs201220977;rs34124994:rs7924036:rs7924036;rs557044785:rs149727843;rs141929745:rs7924036;rs557044785:rs34124994:rs141929745:10:65262396_CA_C:10:64982989_GT_G:rs7924036;rs201220977:rs34030237:rs34030237;rs746973976:rs746973976:rs764351876:10:65036225_CA_C:rs149727843	21
ENSG00000182010	RTKN2	10	63942794	64028466	-1	protein_coding	219790	RTKN2	1.30977e-14	2.54628	0	0	0	NA	NA	NA	NA	Yes	Adult_Cortex:Left_Ventricle:GM12878:IMR90:Mesenchymal_Stem_Cell:Mesendoderm:Trophoblast-like_Cell	8.5e-19	rs149727843;rs141929745:rs7924036;rs34124994;rs557044785:rs141929745:rs7924036:10:65262396_CA_C:rs7924036;rs34124994:10:64982989_GT_G:rs7924036;rs557044785:rs34030237:rs34030237;rs746973976:rs746973976	21
ENSG00000150347	ARID5B	10	63661059	63856703	1	protein_coding	84159	ARID5B	0.99989	-1.13936	0	0	0	NA	NA	NA	NA	Yes	Adult_Cortex:Fetal_Cortex:Aorta:Left_Ventricle:Liver:GM12878:IMR90:Mesenchymal_Stem_Cell:Trophoblast-like_Cell	4.7e-18	rs149727843;rs141929745:rs7924036;rs34124994;rs557044785:rs34030237;rs746973976:rs141929745:rs7924036:rs7924036;rs34124994:rs746973976:10:65262396_CA_C:rs7924036	21
ENSG00000170312	CDK1	10	62538089	62554610	1	protein_coding	983	CDK1	0.970572	-0.363031	0	0	0	NA	NA	NA	NA	Yes	IMR90:Mesenchymal_Stem_Cell:Mesendoderm	1.5e-17	rs141929745:rs7924036;rs34124994;rs557044785:rs149727843;rs141929745:rs7924036:10:65262396_CA_C:rs7924036;rs34124994:rs7924036;rs557044785:rs34030237:rs34030237;rs746973976:rs746973976	21
ENSG00000072422	RHOBTB1	10	62629196	62761198	-1	protein_coding	9886	RHOBTB1	0.00183823	-0.452042	0	0	0	NA	NA	NA	NA	Yes	Mesenchymal_Stem_Cell	1.5e-17	rs149727843;rs141929745:rs7924036:rs7924036;rs34124994;rs557044785:rs7924036;rs34124994:rs141929745:10:65262396_CA_C	21
ENSG00000183346	C10orf107	10	63422719	63526524	1	protein_coding	219621	C10orf107	0.00079093	-0.76989	0	0	0	NA	NA	NA	NA	Yes	Fetal_Cortex:Mesenchymal_Stem_Cell	1.5e-17	rs149727843;rs141929745:rs7924036;rs34124994;rs557044785:rs141929745:rs7924036:10:65262396_CA_C:rs7924036	21
ENSG00000138311	ZNF365	10	64133951	64431771	1	protein_coding	22891	ZNF365	3.62115e-05	-0.151965	0	0	0	NA	NA	NA	NA	Yes	IMR90:Mesenchymal_Stem_Cell:Mesendoderm	1.5e-17	rs149727843;rs141929745:rs7924036:rs7924036;rs34124994;rs557044785:rs7924036;rs34124994:rs141929745:10:65262396_CA_C:rs7924036;rs557044785:rs34030237:rs34030237;rs746973976:rs746973976	21
ENSG00000181915	ADO	10	64564516	64568238	1	protein_coding	84890	ADO	0.745073	-0.496919	0	0	0	NA	NA	NA	NA	Yes	Adult_Cortex:Left_Ventricle:IMR90	1.5e-17	rs149727843;rs141929745:rs7924036;rs34124994;rs557044785:rs141929745:rs7924036:10:65262396_CA_C:rs7924036	21
ENSG00000122877	EGR2	10	64571756	64679660	-1	protein_coding	1959	EGR2	0.619543	-0.491267	0	0	0	NA	NA	NA	NA	Yes	GM12878:Mesendoderm:Trophoblast-like_Cell:hESC	1.5e-17	rs141929745:rs7924036;rs34124994;rs557044785:rs149727843;rs141929745:rs7924036:10:65262396_CA_C:rs7924036;rs34124994:rs746973976	21
ENSG00000148572	NRBF2	10	64893050	64914783	1	protein_coding	29982	NRBF2	0.0821062	-0.409713	21	13.93	12	1.94734e-05	0.0157243	GTEx/v8/Artery_Tibial	+	Yes	Aorta:Left_Ventricle:Liver:GM12878:IMR90:Mesenchymal_Stem_Cell:Mesendoderm:Trophoblast-like_Cell:hESC	1.5e-17	rs149727843;rs141929745;rs7924036;rs34124994;rs557044785;rs34030237;rs141929745:rs7924036;rs557044785:rs149727843;rs141929745:rs7924036:10:65262396_CA_C:rs7924036;rs34124994:rs7924036;rs557044785:rs34030237:rs34030237;rs746973976:rs746973976	21
ENSG00000138109	CYP2C9	10	96698415	96749147	1	protein_coding	1559	CYP2C9	2.53599e-08	0.0773535	38	8.103	18	1.67662e-05	1.43644e-09	GTEx/v8/Adipose_Subcutaneous	+	Yes	Liver	9.5e-11	rs55891451;rs11596236;rs11596236:rs55891451	22
ENSG00000138115	CYP2C8	10	96796530	96829254	-1	protein_coding	1558	CYP2C8	5.3504e-12	0.0732111	0	0	21	0.000112151	1.88917e-11	GTEx/v8/Adipose_Subcutaneous:GTEx/v8/Artery_Aorta	+	No	NA	9.5e-11	rs55891451	22
ENSG00000173124	C10orf129	10	96953957	96988685	1	protein_coding	142827	C10orf129	0.0112102	-0.0509777	0	0	47	3.91712e-20	5.72937e-59	GTEx/v8/Adipose_Subcutaneous:GTEx/v8/Adipose_Visceral_Omentum:GTEx/v8/Artery_Aorta:GTEx/v8/Artery_Coronary	+	No	NA	9.5e-11	rs55891451;rs11596236	22
ENSG00000107438	PDLIM1	10	96997329	97050781	-1	protein_coding	9124	PDLIM1	1.38008e-05	NA	0	0	31	3.74346e-05	0.00175862	GTEx/v8/Adipose_Subcutaneous	+	Yes	hESC	9.5e-11	rs55891451;rs11596236:rs55891451	22
ENSG00000269948	RP11-248J23.6	10	97709725	97744785	1	protein_coding	NA	NA	NA	NA	0	0	0	NA	NA	NA	NA	Yes	Left_Ventricle	9.5e-11	rs55891451:rs11596236	22
ENSG00000108242	CYP2C18	10	96443251	96495947	1	protein_coding	1562	CYP2C18	5.26729e-08	0.613729	0	0	0	NA	NA	NA	NA	Yes	Liver	1.3e-10	rs55891451:rs11596236	22
ENSG00000165841	CYP2C19	10	96447911	96613017	1	protein_coding	1557	CYP2C19	2.53769e-10	-0.174574	0	0	0	NA	NA	NA	NA	Yes	Liver	1.3e-10	rs55891451:rs11596236	22
ENSG00000173088	C10orf131	10	97667360	97698480	1	protein_coding	387707	C10orf131	NA	1.31857	0	0	0	NA	NA	NA	NA	Yes	Mesendoderm	5.5e-10	rs11596236:rs55891451	22
ENSG00000078114	NEBL	10	21068902	21463116	-1	protein_coding	10529	NEBL	5.76984e-24	-0.148103	0	0	0	NA	NA	NA	NA	Yes	Aorta:Left_Ventricle:IMR90:Mesenchymal_Stem_Cell:Mesendoderm:hESC	6.6e-09	10:22255616_CT_C	20
ENSG00000204683	C10orf113	10	21414692	21435488	-1	protein_coding	387638	C10orf113	0.00753778	-0.171514	0	0	0	NA	NA	NA	NA	Yes	Left_Ventricle:IMR90:Mesenchymal_Stem_Cell:Mesendoderm:Trophoblast-like_Cell:hESC	6.6e-09	10:22255616_CT_C	20
ENSG00000204682	CASC10	10	21781587	21786191	-1	protein_coding	399726	CASC10	0.0200549	-1.90404	0	0	114	1.31051e-07	0.000145226	GTEx/v8/Artery_Aorta:GTEx/v8/Artery_Tibial	-	Yes	Promoter_anchored_loops:Left_Ventricle:Liver:Right_Ventricle:Spleen:GM12878:IMR90:Mesenchymal_Stem_Cell:Mesendoderm:Neural_Progenitor_Cell:Trophoblast-like_Cell:hESC	6.6e-09	10:22255616_CT_C	20
ENSG00000180592	SKIDA1	10	21802407	21814611	-1	protein_coding	387640	SKIDA1	NA	-1.17475	0	0	0	NA	NA	NA	NA	Yes	Adult_Cortex:Liver:GM12878:IMR90:Mesenchymal_Stem_Cell:Mesendoderm:Neural_Progenitor_Cell:Trophoblast-like_Cell:hESC	6.6e-09	10:22255616_CT_C	20
ENSG00000078403	MLLT10	10	21823094	22032559	1	protein_coding	8028	MLLT10	0.999584	-0.518307	33	9.043	0	NA	NA	NA	NA	Yes	Promoter_anchored_loops:Liver:GM12878:IMR90:Mesenchymal_Stem_Cell:Mesendoderm:Neural_Progenitor_Cell:Trophoblast-like_Cell:hESC	6.6e-09	10:22255616_CT_C	20
ENSG00000136770	DNAJC1	10	22045466	22292698	-1	protein_coding	64215	DNAJC1	1.42209e-08	NA	106	15.8	0	NA	NA	NA	NA	No	NA	6.6e-09	10:22255616_CT_C	20
ENSG00000223601	EBLN1	10	22497743	22498950	-1	protein_coding	340900	EBLN1	6.91019e-05	-0.17263	0	0	0	NA	NA	NA	NA	Yes	Aorta:Left_Ventricle:Liver:GM12878:IMR90:Mesenchymal_Stem_Cell:Mesendoderm:Trophoblast-like_Cell:hESC	6.6e-09	10:22255616_CT_C	20
ENSG00000148444	COMMD3	10	22604903	22609235	1	protein_coding	23412	COMMD3	0.00742011	NA	0	0	0	NA	NA	NA	NA	Yes	Adult_Cortex:Aorta:Dorsolateral_Prefrontal_Cortex:Hippocampus:Left_Ventricle:Liver:Right_Ventricle:GM12878:IMR90:Mesenchymal_Stem_Cell:Mesendoderm:Neural_Progenitor_Cell:Trophoblast-like_Cell:hESC	6.6e-09	10:22255616_CT_C	20
ENSG00000269897	COMMD3-BMI1	10	22605317	22618471	1	protein_coding	100532731	COMMD3-BMI1	0.0225993	NA	0	0	0	NA	NA	NA	NA	Yes	Adult_Cortex:Aorta:Dorsolateral_Prefrontal_Cortex:Hippocampus:Left_Ventricle:Liver:Right_Ventricle:GM12878:IMR90:Mesenchymal_Stem_Cell:Mesendoderm:Neural_Progenitor_Cell:Trophoblast-like_Cell:hESC	6.6e-09	10:22255616_CT_C	20
ENSG00000168283	BMI1	10	22610140	22620413	1	protein_coding	648	BMI1	0.515145	-0.143841	0	0	0	NA	NA	NA	NA	Yes	Adult_Cortex:Aorta:Dorsolateral_Prefrontal_Cortex:Hippocampus:Left_Ventricle:Liver:Right_Ventricle:GM12878:IMR90:Mesenchymal_Stem_Cell:Mesendoderm:Neural_Progenitor_Cell:Trophoblast-like_Cell:hESC	6.6e-09	10:22255616_CT_C	20
ENSG00000077327	SPAG6	10	22634399	22743153	1	protein_coding	9576	SPAG6	7.41292e-06	-0.814068	0	0	0	NA	NA	NA	NA	Yes	Aorta:Dorsolateral_Prefrontal_Cortex:Hippocampus:Left_Ventricle:Liver:Right_Ventricle:GM12878:IMR90:Mesenchymal_Stem_Cell:Mesendoderm:Neural_Progenitor_Cell:Trophoblast-like_Cell:hESC	6.6e-09	10:22255616_CT_C	20
ENSG00000150867	PIP4K2A	10	22823778	23003484	-1	protein_coding	5305	PIP4K2A	0.788196	1.15027	0	0	0	NA	NA	NA	NA	Yes	IMR90:Mesenchymal_Stem_Cell:Mesendoderm:hESC	6.6e-09	10:22255616_CT_C	20
ENSG00000165309	ARMC3	10	23216953	23326518	1	protein_coding	219681	ARMC3	4.53373e-08	-0.253773	0	0	0	NA	NA	NA	NA	Yes	Aorta:Left_Ventricle:Liver:GM12878:IMR90:Mesenchymal_Stem_Cell:Mesendoderm:Neural_Progenitor_Cell:Trophoblast-like_Cell:hESC	6.6e-09	10:22255616_CT_C	20
ENSG00000148450	MSRB2	10	23384435	23410942	1	protein_coding	22921	MSRB2	0.00424761	-0.322431	0	0	0	NA	NA	NA	NA	Yes	Aorta:Left_Ventricle:Liver:GM12878:IMR90:Mesenchymal_Stem_Cell:Mesendoderm:Trophoblast-like_Cell:hESC	6.6e-09	10:22255616_CT_C	20
ENSG00000165312	OTUD1	10	23728198	23731308	1	protein_coding	220213	OTUD1	NA	-0.182613	0	0	0	NA	NA	NA	NA	Yes	IMR90	6.6e-09	10:22255616_CT_C	20
ENSG00000119969	HELLS	10	96305547	96373662	1	protein_coding	3070	HELLS	0.999418	0.0658543	0	0	13	6.22444e-06	1.74635e-17	GTEx/v8/Adipose_Subcutaneous	+	No	NA	2.3e-08	rs11596236	22
ENSG00000269879	AL353583.1	10	24770273	24770632	-1	protein_coding	NA	NA	NA	NA	0	0	0	NA	NA	NA	NA	Yes	IMR90	1.1e-07	10:22255616_CT_C	20
ENSG00000241058	NSUN6	10	18834490	18940551	-1	protein_coding	221078	NSUN6	1.72775e-14	-0.298656	0	0	0	NA	NA	NA	NA	Yes	GM12878	5.6e-06	10:22255616_CT_C	20
ENSG00000271786	RP11-139J15.7	10	18931405	18944123	-1	protein_coding	NA	NA	NA	NA	0	0	0	NA	NA	NA	NA	Yes	GM12878	5.6e-06	10:22255616_CT_C	20
ENSG00000165997	ARL5B	10	18948334	18970568	1	protein_coding	221079	ARL5B	0.463976	0.319438	0	0	0	NA	NA	NA	NA	Yes	GM12878	5.6e-06	10:22255616_CT_C	20
ENSG00000089597	GANAB	11	62392298	62414104	-1	protein_coding	23193	GANAB	0.999948	-1.00534	0	0	7	4.0164e-06	0.0180353	GTEx/v8/Liver	-	Yes	GM12878:Mesenchymal_Stem_Cell:Mesendoderm:Trophoblast-like_Cell	7.7e-285	rs174597;rs117198764:rs10897232:rs11230920;rs386754192:rs1792909:rs10897232;rs7943493:rs386754192:rs12806663:rs12806663;rs10897232;rs7943493:rs10897232;rs536206626;rs1627693:rs536206626:rs536206626;rs1627693:rs11230985:rs7936908	23
ENSG00000167994	RAB3IL1	11	61664773	61687741	-1	protein_coding	5866	RAB3IL1	0.000894541	-0.364568	83	15.59	0	NA	NA	NA	NA	Yes	Promoter_anchored_loops:Aorta:Left_Ventricle:Liver:Right_Ventricle:Spleen:GM12878:IMR90:Mesenchymal_Stem_Cell:Mesendoderm:Neural_Progenitor_Cell:Trophoblast-like_Cell:hESC	1.2e-283	rs36047269;11:61648649_AAATG_A;rs174453;rs528285;rs116962591;rs529349261;rs412334;rs174468;rs174472;rs174473;rs174477;rs7115739;11:61670459_AC_A;rs117828446;rs11230813;rs1076180;rs148623923;rs61898562;rs117664091;rs540613;rs35371411;rs2524287;rs2727258;rs174480;rs2736598;rs76133863;rs11230827;rs149037697;rs182407676;rs17156580;rs747321234;rs11825591;rs2524292;rs17156254:rs769908354;rs3018327:rs76…	23
ENSG00000167995	BEST1	11	61717293	61732987	1	protein_coding	7439	BEST1	4.88562e-08	0.261397	85	19.26	11	4.08457e-07	0.000730003	GTEx/v8/Artery_Tibial	-	Yes	Promoter_anchored_loops:EP_correlation_cell_type_oneway:Aorta:Left_Ventricle:Liver:Right_Ventricle:Spleen:GM12878:IMR90:Mesenchymal_Stem_Cell:Mesendoderm:Neural_Progenitor_Cell:Trophoblast-like_Cell:hESC	1.2e-283	rs2524292;rs74556176;rs182407676;rs2736598;rs2524293;rs60517521;rs2521572;rs74754540;rs2727260;rs2009875;rs195161;rs2736595;rs174481;rs112657532;rs183176;rs17156580;rs149698;rs56215258;rs4963440;11:61742244_CAA_C;rs111605165;rs35686945;rs71490346;rs117832375;rs76978219;rs778782193;rs528285:rs116962591:rs529349261:rs412334:rs174468:11:61648649_AAATG_A:rs174472:rs174453;rs174473;rs174477:rs7115739:…	23
ENSG00000124939	SCGB2A1	11	61976140	61981408	1	protein_coding	4246	SCGB2A1	0.0564013	-0.285395	41	6.046	0	NA	NA	NA	NA	Yes	EP_correlation_cell_type_oneway:Aorta:Left_Ventricle:Liver:Right_Ventricle:Spleen:GM12878:IMR90:Mesenchymal_Stem_Cell:Mesendoderm:Neural_Progenitor_Cell:Trophoblast-like_Cell:hESC	1.2e-283	rs386754192;rs10897232;rs12806663;rs7943493;rs536206626;rs1627693;rs117198764;rs11230985;rs7936908;rs113003506:rs174453:rs36047269:rs12806663:rs7936908:rs117198764:rs571932724:rs61893681:rs536206626;rs1627693:rs10897232;rs7943493:rs10897232:rs10909647;rs61893681:rs1792909;rs11230920;rs386754192:rs1792909:rs386754192:rs140534658:rs11230920;rs386754192:rs10897232;rs7943493:rs61895466:rs259869;rs112…	23
ENSG00000167992	VWCE	11	61025762	61062896	-1	protein_coding	220001	VWCE	5.90266e-13	-0.457823	0	0	0	NA	NA	NA	NA	Yes	Promoter_anchored_loops	5.7e-281	rs17762402:rs61896141:rs117110139:rs740006	23
ENSG00000124920	MYRF	11	61520114	61555990	1	protein_coding	745	MYRF	0.999848	-1.65959	75	19.93	139	1.09303e-44	4.14272e-37	GTEx/v8/Adipose_Subcutaneous:GTEx/v8/Artery_Tibial:GTEx/v8/Liver:GTEx/v8/Pancreas	-	Yes	Promoter_anchored_loops:Left_Ventricle:Spleen:IMR90	5.7e-281	rs17156254;rs769908354;rs3018327;rs198441;rs117494202;rs198435;rs2238001;rs199969886;rs198422;rs198459;rs9326418;rs77053629;rs198476;rs695186;rs543711028;rs181935125;rs61896137;rs2269928;rs79519287;11:61537648_TG_T;rs174532;rs628993;rs139424418;rs78596000;rs61896141;rs695867;rs509360;rs61747222;rs17762402;rs117110139;rs740006;rs7102974;rs412334;rs174597;rs1495941;rs762923346;rs72914277;rs54624075…	23
ENSG00000167996	FTH1	11	61727190	61735132	-1	protein_coding	2495	FTH1	0.918437	NA	70	19.26	0	NA	NA	NA	NA	Yes	Promoter_anchored_loops:EP_correlation_cell_type_oneway:EP_correlation_organ_oneway:Adult_Cortex:Aorta:Left_Ventricle:Liver:Spleen:GM12878:IMR90:Mesenchymal_Stem_Cell:Mesendoderm:Neural_Progenitor_Cell:Trophoblast-like_Cell:hESC	1.4e-278	rs2736595;rs2727260;rs112657532;rs2521572;rs183176;rs74556176;rs60517521;rs195161;rs74754540;rs17156580;rs149698;rs56215258;rs4963440;11:61742244_CAA_C;rs111605165;rs35686945;rs71490346;rs117832375;rs2524293:rs74556176:rs74556176;rs60517521:rs2521572:rs74754540:rs2727260:rs2009875:rs195161;rs2736595:rs174481:rs2736595:rs2727260;rs112657532:rs183176:rs111605165:rs149698;rs7935835:rs56215258;rs7787…	23
ENSG00000269089	AP003733.1	11	61735453	61736755	1	protein_coding	NA	NA	NA	NA	42	13.73	0	NA	NA	NA	NA	Yes	Promoter_anchored_loops:EP_correlation_cell_type_oneway:EP_correlation_organ_oneway:Adult_Cortex:Aorta:Left_Ventricle:Liver:Spleen:GM12878:IMR90:Mesenchymal_Stem_Cell:Mesendoderm:Neural_Progenitor_Cell:Trophoblast-like_Cell:hESC	1.4e-278	rs195161;rs2736595;rs183176;rs74754540;rs17156580;rs149698;rs56215258;rs4963440;11:61742244_CAA_C;rs111605165;rs60517521;rs74556176;rs35686945;rs71490346;rs117832375;rs4343027;rs76978219;rs2524293:rs74556176:rs74556176;rs60517521:rs2521572:rs74754540:rs2727260:rs2009875:rs195161;rs2736595:rs174481:rs2736595:rs2727260;rs112657532:rs183176:rs111605165:rs149698;rs7935835:rs56215258;rs778782193;rs356…	23
ENSG00000124942	AHNAK	11	62201016	62323707	-1	protein_coding	79026	AHNAK	0.344567	-0.479742	1	3.833	0	NA	NA	NA	NA	Yes	Left_Ventricle:GM12878:IMR90:Mesenchymal_Stem_Cell:Mesendoderm	1.4e-278	rs145908530;rs117198764:rs7102974:rs412334:rs695867:rs117110139:rs75938339:rs2727263:rs138012803:rs75992720;rs78596000:rs695867;rs11230803:rs61897792:rs174569:rs61896141:rs78596000:rs174597:rs11230803:rs10897232:rs11230920;rs386754192:rs1792909:rs10897232;rs7943493:rs386754192:rs12806663:rs12806663;rs10897232;rs7943493:rs10897232;rs536206626;rs1627693:rs536206626:rs536206626;rs1627693:rs11230985:…	23
ENSG00000254772	EEF1G	11	62327073	62342401	-1	protein_coding	1937	EEF1G	0.998058	-0.55316	0	0	2	3.2188e-05	7.10406e-06	GTEx/v8/Adipose_Visceral_Omentum	-	Yes	Promoter_anchored_loops:Adult_Cortex:Left_Ventricle:GM12878:IMR90:Mesenchymal_Stem_Cell:Mesendoderm	1.4e-278	rs73493300;rs61893681;rs61895504;rs61893661:rs1627693:rs7943493:rs72928167:rs11230920:rs61895504;rs61893661:rs116262432:rs7943493;rs1627693:rs61893661:rs117198764:rs695867;rs11230803:rs75992720;rs78596000:rs61897792:rs145908530:rs7102974:rs412334:rs695867:rs117110139:rs75938339:rs2727263:rs138012803:rs174569:rs61896141:rs78596000:rs174597:rs11230803:rs10897232:rs11230920;rs386754192:rs1792909:rs1…	23
ENSG00000255508	MIR3654	11	62327075	62359003	-1	protein_coding	100500804	MIR3654	NA	NA	0	0	0	NA	NA	NA	NA	Yes	Adult_Cortex:Left_Ventricle:GM12878:IMR90:Mesenchymal_Stem_Cell:Mesendoderm	1.4e-278	rs145908530:rs117198764:rs7102974:rs412334:rs695867:rs117110139:rs75938339:rs2727263:rs138012803:rs75992720;rs78596000:rs695867;rs11230803:rs61897792:rs174569:rs61896141:rs78596000:rs174597:rs11230803:rs10897232:rs11230920;rs386754192:rs1792909:rs10897232;rs7943493:rs386754192:rs12806663:rs12806663;rs10897232;rs7943493:rs10897232;rs536206626;rs1627693:rs536206626:rs536206626;rs1627693:rs11230985:…	23
ENSG00000149016	TUT1	11	62342517	62359649	-1	protein_coding	64852	TUT1	9.9851e-06	-0.411889	0	0	0	NA	NA	NA	NA	Yes	Adult_Cortex:Left_Ventricle:GM12878:IMR90:Mesenchymal_Stem_Cell:Mesendoderm	1.4e-278	rs145908530:rs117198764:rs7102974:rs412334:rs695867:rs117110139:rs75938339:rs2727263:rs138012803:rs75992720;rs78596000:rs695867;rs11230803:rs61897792:rs174569:rs61896141:rs78596000:rs174597:rs11230803:rs10897232:rs11230920;rs386754192:rs1792909:rs10897232;rs7943493:rs386754192:rs12806663:rs12806663;rs10897232;rs7943493:rs10897232;rs536206626;rs1627693:rs536206626:rs536206626;rs1627693:rs11230985:…	23
ENSG00000204950	LRRC10B	11	61276272	61278482	1	protein_coding	390205	LRRC10B	NA	0.211958	13	10.58	10	1.04456e-06	0.000864642	GTEx/v8/Artery_Tibial	-	Yes	Promoter_anchored_loops:EP_correlation_cell_type_oneway:Adult_Cortex:IMR90	2.8e-265	rs7943992;rs71490328;rs2924438;rs3018731:rs198435;rs2238001;rs199969886:rs17156254;rs12271414:rs75618234:rs769908354;rs3018327:rs543711028:rs117186302:rs199969886:rs17156254:rs78596000:rs61896141:rs695867:rs509360:rs61747222:rs174532:rs75992720;rs78596000:rs762923346;rs72914277:11:61409901_GT_G:rs546240759:rs145786300:rs198435:rs3018326:rs137915577:rs546240759;rs762923346:rs762923346:rs76376981:r…	23
ENSG00000149489	ROM1	11	62379194	62382592	1	protein_coding	6094	ROM1	0.00326883	NA	0	0	3	2.92069e-05	1.99871e-39	GTEx/v8/Adipose_Subcutaneous:GTEx/v8/Pancreas	-	No	NA	8.8e-170	rs174468;rs61895466	23
ENSG00000006118	TMEM132A	11	60691935	60704631	1	protein_coding	54972	TMEM132A	2.88926e-06	NA	0	0	3	1.86449e-05	0.0353944	GTEx/v8/Pancreas	-	Yes	Adult_Cortex:Fetal_Cortex:Spleen:IMR90:Mesenchymal_Stem_Cell:Mesendoderm:Trophoblast-like_Cell	1.3e-105	rs75992720;rs886264:rs12805902:rs79387516:rs146156958:rs78763563:rs17156254;rs12271414:rs12271414:11:61441790_GTGGA_G:rs3018327:rs198435:rs198435;rs199969886:rs574003650;rs3018327:11:61445143_AT_A:rs574003650:rs198435;rs2238001;rs199969886:rs198441:rs769908354;rs3018327:rs56672345:rs2232143	23
ENSG00000149480	MTA2	11	62360686	62369312	-1	protein_coding	9219	MTA2	0.978013	0.105632	0	0	0	NA	NA	NA	NA	Yes	Promoter_anchored_loops:Adult_Cortex	1.3e-101	rs17156254:rs769908354;rs3018327:rs769908354:rs198441:rs117494202:rs198435;rs2238001;rs199969886:rs198422:rs198459:rs9326418:rs77053629:rs695867;rs11230803:rs75992720;rs78596000:rs61897792:rs61895466:rs259869;rs11230885:rs116262432:rs259869:rs117198764:rs145908530	23
ENSG00000197745	SCGB1D4	11	62063754	62066536	-1	protein_coding	404552	SCGB1D4	0.00290219	-0.0741114	1	1.011	0	NA	NA	NA	NA	Yes	Adult_Cortex:Aorta:Left_Ventricle:Liver:Right_Ventricle:GM12878:IMR90:Mesenchymal_Stem_Cell:Mesendoderm:Trophoblast-like_Cell:hESC	3.5e-83	rs117198764;rs78763563:rs17156254;rs12271414:rs12271414:11:61441790_GTGGA_G:rs3018327:rs198435:rs198435;rs199969886:rs574003650;rs3018327:11:61445143_AT_A:rs574003650:rs198435;rs2238001;rs199969886:rs198441:rs769908354;rs3018327:rs695867;rs11230803:rs75992720;rs78596000:rs61897792:rs386754192:rs1792909:rs10897232;rs7943493:rs11230920;rs386754192:rs117198764:rs12806663:rs7936908:rs10897232:rs12806…	23
ENSG00000255432	RP11-831H9.11	11	62417166	62432650	-1	protein_coding	NA	NA	NA	NA	0	0	0	NA	NA	NA	NA	Yes	Promoter_anchored_loops:Adult_Cortex:Fetal_Cortex:GM12878:Mesenchymal_Stem_Cell:Mesendoderm:Trophoblast-like_Cell	3.5e-83	rs117198764:rs78763563:rs17156254;rs12271414:rs12271414:11:61441790_GTGGA_G:rs3018327:rs198435:rs198435;rs199969886:rs574003650;rs3018327:11:61445143_AT_A:rs574003650:rs198435;rs2238001;rs199969886:rs198441:rs769908354;rs3018327:rs695867;rs11230803:rs75992720;rs78596000:rs61897792:rs145908530:rs10897232:rs11230920;rs386754192:rs1792909:rs10897232;rs7943493:rs386754192:rs12806663:rs12806663;rs1089…	23
ENSG00000162194	C11orf48	11	62430287	62439727	-1	protein_coding	79081	C11orf48	1.53759e-05	0.0623	0	0	4	9.9952e-06	2.14059e-08	GTEx/v8/Heart_Left_Ventricle	+	Yes	Promoter_anchored_loops:Adult_Cortex:Fetal_Cortex:GM12878:Mesenchymal_Stem_Cell:Mesendoderm:Trophoblast-like_Cell	3.5e-83	rs259869;rs11230885;rs117198764:rs78763563:rs17156254;rs12271414:rs12271414:11:61441790_GTGGA_G:rs3018327:rs198435:rs198435;rs199969886:rs574003650;rs3018327:11:61445143_AT_A:rs574003650:rs198435;rs2238001;rs199969886:rs198441:rs769908354;rs3018327:rs695867;rs11230803:rs75992720;rs78596000:rs61897792:rs145908530:rs10897232:rs11230920;rs386754192:rs1792909:rs10897232;rs7943493:rs386754192:rs128066…	23
ENSG00000214756	METTL12	11	62432781	62435968	1	protein_coding	751071	METTL12	0.00946026	-0.808108	0	0	0	NA	NA	NA	NA	Yes	Promoter_anchored_loops:Adult_Cortex:Fetal_Cortex:GM12878:Mesenchymal_Stem_Cell:Mesendoderm:Trophoblast-like_Cell	3.5e-83	rs117198764:rs78763563:rs17156254;rs12271414:rs12271414:11:61441790_GTGGA_G:rs3018327:rs198435:rs198435;rs199969886:rs574003650;rs3018327:11:61445143_AT_A:rs574003650:rs198435;rs2238001;rs199969886:rs198441:rs769908354;rs3018327:rs695867;rs11230803:rs75992720;rs78596000:rs61897792:rs145908530:rs10897232:rs11230920;rs386754192:rs1792909:rs10897232;rs7943493:rs386754192:rs12806663:rs12806663;rs1089…	23
ENSG00000204922	C11orf83	11	62437745	62441159	1	protein_coding	790955	C11orf83	0.000546458	-1.07562	0	0	0	NA	NA	NA	NA	Yes	Promoter_anchored_loops:Adult_Cortex:Fetal_Cortex:GM12878:Mesenchymal_Stem_Cell:Mesendoderm:Trophoblast-like_Cell	3.5e-83	rs117198764:rs78763563:rs17156254;rs12271414:rs12271414:11:61441790_GTGGA_G:rs3018327:rs198435:rs198435;rs199969886:rs574003650;rs3018327:11:61445143_AT_A:rs574003650:rs198435;rs2238001;rs199969886:rs198441:rs769908354;rs3018327:rs695867;rs11230803:rs75992720;rs78596000:rs61897792:rs145908530:rs10897232:rs11230920;rs386754192:rs1792909:rs10897232;rs7943493:rs386754192:rs12806663:rs12806663;rs1089…	23
ENSG00000162191	UBXN1	11	62443970	62446567	-1	protein_coding	51035	UBXN1	0.768418	-0.657822	0	0	0	NA	NA	NA	NA	Yes	Adult_Cortex:Fetal_Cortex:IMR90:Mesenchymal_Stem_Cell	3.5e-83	rs695867;rs11230803:rs75992720;rs78596000:rs61897792:rs386754192:rs1792909:rs10897232;rs7943493:rs11230920;rs386754192:rs117198764:rs145908530	23
ENSG00000162148	PPP1R32	11	61248592	61258403	1	protein_coding	220004	PPP1R32	2.68242e-07	-0.326395	21	10.67	2	7.70395e-05	6.57508e-14	GTEx/v8/Adipose_Subcutaneous:GTEx/v8/Adipose_Visceral_Omentum	-	Yes	Promoter_anchored_loops:EP_correlation_cell_type_oneway:IMR90	2.5e-81	rs3018731;rs71490328;rs7943992;rs17156254;rs79387516:rs7943992:rs71490328;rs7943992:rs762923346;rs72914277:11:61409901_GT_G:rs546240759:rs145786300:rs75992720;rs78596000:rs198435:rs3018326:rs137915577:rs546240759;rs762923346:rs762923346:rs76376981:rs34915636:rs574003650;rs3018326:rs12271414:rs574003650:rs574003650;rs3018327:rs35703574	23
ENSG00000167986	DDB1	11	61066923	61110068	-1	protein_coding	1642	DDB1	0.999992	-1.1253	2	6.886	0	NA	NA	NA	NA	Yes	Adult_Cortex:Fetal_Cortex:Aorta:Left_Ventricle:Liver:Pancreas:Spleen:GM12878:IMR90:Mesenchymal_Stem_Cell:Mesendoderm:Trophoblast-like_Cell:hESC	5.8e-78	rs79387516;rs7116318;rs79387516:rs146156958:rs10897232:rs11230920;rs386754192:rs1792909:rs10897232;rs7943493:rs386754192:rs12806663:rs12806663;rs10897232;rs7943493:rs10897232;rs536206626;rs1627693:rs536206626:rs536206626;rs1627693:rs117198764:rs11230985:rs7936908:rs80264062:rs7116318:rs762923346;rs72914277:11:61409901_GT_G:rs546240759:rs145786300:rs198435:rs3018326:rs137915577:rs546240759;rs76292…	23
ENSG00000149476	DAK	11	61100682	61120767	1	protein_coding	26007	DAK	2.79479e-07	-1.07856	1	8.696	0	NA	NA	NA	NA	Yes	Adult_Cortex:Fetal_Cortex:Aorta:Left_Ventricle:Liver:Pancreas:Spleen:GM12878:IMR90:Mesenchymal_Stem_Cell:Mesendoderm:Trophoblast-like_Cell:hESC	5.8e-78	rs146156958;rs79387516:rs146156958:rs10897232:rs11230920;rs386754192:rs1792909:rs10897232;rs7943493:rs386754192:rs12806663:rs12806663;rs10897232;rs7943493:rs10897232;rs536206626;rs1627693:rs536206626:rs536206626;rs1627693:rs117198764:rs11230985:rs7936908:rs80264062:rs7116318:rs762923346;rs72914277:11:61409901_GT_G:rs546240759:rs145786300:rs198435:rs3018326:rs137915577:rs546240759;rs762923346:rs76…	23
ENSG00000011347	SYT7	11	61282785	61348620	-1	protein_coding	9066	SYT7	0.904579	NA	38	19.66	5	5.73937e-10	4.42196e-06	GTEx/v8/Adipose_Subcutaneous:GTEx/v8/Adipose_Visceral_Omentum:GTEx/v8/Artery_Tibial:GTEx/v8/Heart_Left_Ventricle	-	Yes	Adult_Cortex:Fetal_Cortex:IMR90:Mesenchymal_Stem_Cell:Mesendoderm:Trophoblast-like_Cell	5.8e-78	rs71490328;rs7943992;rs2924438;rs73496248;rs11230741;rs1794072;rs11604913;rs441938;rs12362237;rs11230749;rs259889;rs79387516:rs71490328;rs7943992:rs71490328:rs7943992:rs11230749:rs1624931:rs12362237:rs762923346;rs72914277:11:61409901_GT_G:rs546240759:rs145786300:rs78763563:rs17156254;rs12271414:rs12271414:11:61441790_GTGGA_G:rs3018327:rs198435:rs198435;rs199969886:rs574003650;rs3018327:11:6144514…	23
ENSG00000214753	HNRNPUL2	11	62480102	62494821	-1	protein_coding	221092	HNRNPUL2	0.999925	-1.25219	0	0	3	2.79476e-05	0.0249188	GTEx/v8/Artery_Tibial	+	Yes	Promoter_anchored_loops:GM12878	9e-73	rs174481;rs149698;rs7935835;rs1792909;rs11230920;rs386754192:rs61893681:rs536206626;rs1627693:rs10897232;rs7943493:rs10909647;rs61893681:rs117198764	23
ENSG00000256591	RP11-286N22.8	11	61196692	61253294	1	protein_coding	NA	NA	NA	NA	21	13.6	5	7.87139e-06	1.44416e-05	GTEx/v8/Adipose_Subcutaneous:GTEx/v8/Adipose_Visceral_Omentum	+	Yes	Adult_Cortex:Fetal_Cortex:GM12878:IMR90:Mesenchymal_Stem_Cell:Mesendoderm:Trophoblast-like_Cell:hESC	4.8e-68	rs79387516;rs7116318;rs143699220;rs3018731;rs71490328;rs7943992;rs441938;rs2727260;rs75938339;rs146156958:rs79387516:rs762923346;rs72914277:11:61409901_GT_G:rs546240759:rs145786300:rs78763563:rs17156254;rs12271414:rs12271414:11:61441790_GTGGA_G:rs3018327:rs198435:rs198435;rs199969886:rs574003650;rs3018327:11:61445143_AT_A:rs574003650:rs198435;rs2238001;rs199969886:rs198441:rs769908354;rs3018327:r…	23
ENSG00000187049	TMEM216	11	61159159	61166335	1	protein_coding	51259	TMEM216	0.00201929	-0.381412	1	7.051	2	3.95932e-09	2.01962e-19	GTEx/v8/Adipose_Subcutaneous:GTEx/v8/Adipose_Visceral_Omentum:GTEx/v8/Artery_Aorta:GTEx/v8/Artery_Tibial:GTEx/v8/Heart_Atrial_Appendage	+	Yes	Adult_Cortex:Fetal_Cortex:GM12878:IMR90:Mesenchymal_Stem_Cell:Mesendoderm:Trophoblast-like_Cell:hESC	6.7e-64	rs79387516;rs3018731;rs73496248;rs146156958:rs79387516:rs71490328;rs7943992:rs71490328:rs7943992:rs11230741:rs78763563:rs17156254;rs12271414:rs12271414:11:61441790_GTGGA_G:rs3018327:rs198435:rs198435;rs199969886:rs574003650;rs3018327:11:61445143_AT_A:rs574003650:rs198435;rs2238001;rs199969886:rs198441:rs769908354;rs3018327:rs17156254:rs198422:rs769908354:rs12362237:rs11604913:rs12805902:rs5667234…	23
ENSG00000069482	GAL	11	68451247	68458643	1	protein_coding	51083	GAL	0.000289003	NA	0	0	0	NA	NA	NA	NA	Yes	Left_Ventricle:Liver:Spleen:GM12878:IMR90:Mesenchymal_Stem_Cell:Mesendoderm:Trophoblast-like_Cell:hESC	4.8e-57	rs17601808:rs149402055:rs2229738:rs648336:rs653264:rs648336;rs653264:rs79051613;rs143387014:rs145847523;rs79808713:rs4930630:rs79808713:rs117476044:rs11603763;rs653264:rs11603763	24
ENSG00000110090	CPT1A	11	68522088	68611878	-1	protein_coding	1374	CPT1A	0.93914	-0.984477	55	11.71	0	NA	NA	NA	NA	Yes	Adult_Cortex:Fetal_Cortex:Left_Ventricle:IMR90:Mesenchymal_Stem_Cell:Mesendoderm:Trophoblast-like_Cell:hESC	4.8e-57	rs149402055;rs2229738;rs648336;rs653264;rs79051613;rs143387014;rs648336:rs4930630:rs79051613:rs79808713:rs117476044:rs11603763;rs653264:rs11603763:rs17601808	24
ENSG00000197345	MRPL21	11	68658744	68671303	-1	protein_coding	219927	MRPL21	5.4596e-08	-0.421125	38	17.67	256	3.45948e-182	1.1669e-162	GTEx/v8/Adipose_Subcutaneous:GTEx/v8/Adipose_Visceral_Omentum:GTEx/v8/Artery_Aorta:GTEx/v8/Artery_Coronary:GTEx/v8/Artery_Tibial:GTEx/v8/Heart_Atrial_Appendage:GTEx/v8/Heart_Left_Ventricle:GTEx/v8/Liver:GTEx/v8/Pancreas	+	Yes	Adult_Cortex:Fetal_Cortex:IMR90:Mesenchymal_Stem_Cell:hESC	4.8e-57	rs648336;rs4930630;rs145847523;rs143387014;rs79051613;rs653264;rs79808713;rs11603763;rs2229738;rs653264:rs648336:rs79051613;rs143387014:rs79808713:rs11603763:rs4930630:rs117476044:rs11603763;rs653264:rs17601808	24
ENSG00000132740	IGHMBP2	11	68671310	68708070	1	protein_coding	3508	IGHMBP2	1.50944e-08	-0.168255	85	19.16	255	3.83957e-87	1.10403e-76	GTEx/v8/Adipose_Subcutaneous:GTEx/v8/Adipose_Visceral_Omentum:GTEx/v8/Artery_Aorta:GTEx/v8/Artery_Coronary:GTEx/v8/Artery_Tibial:GTEx/v8/Heart_Atrial_Appendage:GTEx/v8/Heart_Left_Ventricle:GTEx/v8/Liver:GTEx/v8/Pancreas	-	Yes	Adult_Cortex:Fetal_Cortex:IMR90:Mesenchymal_Stem_Cell:hESC	4.8e-57	rs648336;rs145847523;rs143387014;rs4930630;rs79051613;rs79808713;rs653264;rs2229738;rs11603763;rs17601808;rs653264:rs648336:rs79051613;rs143387014:rs79808713:rs11603763:rs4930630:rs117476044:rs11603763;rs653264:rs17601808	24
ENSG00000172935	MRGPRF	11	68771863	68780877	-1	protein_coding	116535	MRGPRF	0.370676	-0.628537	11	9.077	240	8.87267e-14	7.98194e-11	GTEx/v8/Adipose_Subcutaneous:GTEx/v8/Adipose_Visceral_Omentum:GTEx/v8/Artery_Aorta	-	Yes	Promoter_anchored_loops:Left_Ventricle:Liver:IMR90:Mesenchymal_Stem_Cell:Mesendoderm:Trophoblast-like_Cell	4.8e-57	rs4930630;rs11603763;rs653264;rs79808713;rs648336;rs145847523:rs648336:rs143387014:rs17601808:rs149402055:rs2229738:rs653264:rs4930630:rs79051613:rs79808713	24
ENSG00000162144	CYB561A3	11	61116217	61129771	-1	protein_coding	220002	CYB561A3	0.0587317	-0.713241	1	8.696	0	NA	NA	NA	NA	Yes	Adult_Cortex:Fetal_Cortex:GM12878:IMR90:Mesenchymal_Stem_Cell:Mesendoderm:Trophoblast-like_Cell:hESC	1.8e-45	rs146156958;rs79387516:rs71490328;rs7943992:rs71490328:rs7943992:rs762923346;rs72914277:11:61409901_GT_G:rs546240759:rs145786300:rs78763563:rs17156254;rs12271414:rs12271414:11:61441790_GTGGA_G:rs3018327:rs198435:rs198435;rs199969886:rs574003650;rs3018327:11:61445143_AT_A:rs574003650:rs198435;rs2238001;rs199969886:rs198441:rs769908354;rs3018327:rs12362237:rs11604913:rs12805902:rs56672345:rs2232143…	23
ENSG00000149483	TMEM138	11	61129473	61136981	1	protein_coding	51524	TMEM138	0.531121	-0.907268	1	8.696	1	4.88517e-06	2.58071e-06	GTEx/v8/Artery_Tibial	-	Yes	Adult_Cortex:Fetal_Cortex:GM12878:IMR90:Mesenchymal_Stem_Cell:Mesendoderm:Trophoblast-like_Cell:hESC	1.8e-45	rs146156958;rs3018731;rs79387516:rs71490328;rs7943992:rs71490328:rs7943992:rs762923346;rs72914277:11:61409901_GT_G:rs546240759:rs145786300:rs78763563:rs17156254;rs12271414:rs12271414:11:61441790_GTGGA_G:rs3018327:rs198435:rs198435;rs199969886:rs574003650;rs3018327:11:61445143_AT_A:rs574003650:rs198435;rs2238001;rs199969886:rs198441:rs769908354;rs3018327:rs12805902:rs56672345:rs2232143:rs80264062:…	23
ENSG00000149532	CPSF7	11	61170121	61197503	-1	protein_coding	79869	CPSF7	0.99133	-1.55329	4	7.702	11	4.56372e-18	3.52258e-13	GTEx/v8/Adipose_Subcutaneous:GTEx/v8/Adipose_Visceral_Omentum:GTEx/v8/Artery_Aorta:GTEx/v8/Artery_Coronary:GTEx/v8/Artery_Tibial:GTEx/v8/Heart_Atrial_Appendage:GTEx/v8/Heart_Left_Ventricle:GTEx/v8/Pancreas	-	Yes	Adult_Cortex:Fetal_Cortex:GM12878:IMR90:Mesenchymal_Stem_Cell:Mesendoderm:Trophoblast-like_Cell:hESC	1.8e-45	rs80264062;rs7116318;rs79387516;rs146156958;rs3018731;rs259872;rs886264;rs56672345;rs2232143;rs146156958:rs79387516:rs762923346;rs72914277:11:61409901_GT_G:rs546240759:rs145786300:rs78763563:rs17156254;rs12271414:rs12271414:11:61441790_GTGGA_G:rs3018327:rs198435:rs198435;rs199969886:rs574003650;rs3018327:11:61445143_AT_A:rs574003650:rs198435;rs2238001;rs199969886:rs198441:rs769908354;rs3018327:rs…	23
ENSG00000167985	SDHAF2	11	61197514	61215001	1	protein_coding	54949	SDHAF2	6.97874e-05	0.630342	3	13.6	24	1.79527e-07	7.13667e-09	GTEx/v8/Adipose_Subcutaneous:GTEx/v8/Artery_Tibial	-	Yes	Adult_Cortex:Fetal_Cortex:GM12878:IMR90:Mesenchymal_Stem_Cell:Mesendoderm:Trophoblast-like_Cell:hESC	1.8e-45	rs79387516;rs7116318;rs1627693;rs536206626;rs10897232;rs7943493;rs1624931;rs146156958:rs79387516:rs762923346;rs72914277:11:61409901_GT_G:rs546240759:rs145786300:rs78763563:rs17156254;rs12271414:rs12271414:11:61441790_GTGGA_G:rs3018327:rs198435:rs198435;rs199969886:rs574003650;rs3018327:11:61445143_AT_A:rs574003650:rs198435;rs2238001;rs199969886:rs198441:rs769908354;rs3018327:rs71490328;rs7943992:…	23
ENSG00000185085	INTS5	11	62414320	62420774	-1	protein_coding	80789	INTS5	0.999284	-0.518034	0	0	0	NA	NA	NA	NA	Yes	EP_links_oneway:Promoter_anchored_loops:Adult_Cortex:Fetal_Cortex:GM12878:Mesenchymal_Stem_Cell:Mesendoderm:Trophoblast-like_Cell	8.3e-43	rs198435;rs2238001;rs199969886:rs198476:rs769908354;rs3018327:rs198441:rs198435:rs181935125:rs17156254;rs12271414:rs75618234:rs543711028:rs117186302:rs199969886:rs17156254:rs61895466:rs259869;rs11230885:rs116262432:rs259869:rs117198764:rs10897232:rs11230920;rs386754192:rs1792909:rs10897232;rs7943493:rs386754192:rs12806663:rs12806663;rs10897232;rs7943493:rs10897232;rs536206626;rs1627693:rs53620662…	23
ENSG00000177363	LRRN4CL	11	62453874	62457371	-1	protein_coding	221091	LRRN4CL	5.43721e-05	-0.633532	0	0	1	7.9937e-05	0.0379404	GTEx/v8/Heart_Atrial_Appendage	+	Yes	IMR90:Mesenchymal_Stem_Cell	1.9e-36	rs7115739;rs74771917;rs117198764	23
ENSG00000110108	TMEM109	11	60681346	60690915	1	protein_coding	79073	TMEM109	0.0518905	-0.925978	0	0	0	NA	NA	NA	NA	Yes	Adult_Cortex:Fetal_Cortex:Spleen:IMR90:Mesenchymal_Stem_Cell:Mesendoderm:Trophoblast-like_Cell	3.3e-27	rs886264:rs12805902:rs146156958:rs79387516:rs78763563:rs17156254;rs12271414:rs12271414:11:61441790_GTGGA_G:rs3018327:rs198435:rs198435;rs199969886:rs574003650;rs3018327:11:61445143_AT_A:rs574003650:rs198435;rs2238001;rs199969886:rs198441:rs769908354;rs3018327:rs56672345:rs2232143	23
ENSG00000171533	MAP6	11	75297963	75380165	-1	protein_coding	4135	MAP6	0.0131669	-1.14566	0	0	0	NA	NA	NA	NA	Yes	Left_Ventricle:Liver:GM12878:IMR90:Mesenchymal_Stem_Cell:Mesendoderm:Trophoblast-like_Cell:hESC	2.5e-24	rs72997616;rs10899133;11:75539742_GTA_G;rs10899105:rs72997616;rs10899105;11:75537738_CT_C:rs72997616;rs10899105:rs141370279:rs10899133:11:75537738_CT_C:11:75539742_GTA_G:rs72997672:11:75553487_CT_C:rs10899105:rs673335:rs72997616;rs28811614:rs117249464:rs72997616;rs28811614:rs190387940:rs12221567:rs28811614:rs72997616:rs72997616;rs12279310:rs7119809:rs12279310	25
ENSG00000166391	MOGAT2	11	75428864	75444003	1	protein_coding	80168	MOGAT2	0.218649	0.716784	30	11.19	7	6.32497e-06	1.3234e-06	GTEx/v8/Liver	+	Yes	Promoter_anchored_loops:Liver:IMR90:Mesenchymal_Stem_Cell:Mesendoderm:Trophoblast-like_Cell:hESC	2.5e-24	rs10899105;rs673335;rs72997616;rs28811614;rs117249464;rs673335:rs72997616;rs28811614:rs117249464:rs72997616;rs28811614:rs72997616;rs10899133;11:75539742_GTA_G;rs10899105:rs72997616;11:75537738_CT_C:rs72997616;rs10899105:rs141370279:rs10899133:11:75537738_CT_C:11:75539742_GTA_G:rs72997672:11:75553487_CT_C:rs72997616;rs12279310:rs7119809:rs12279310	25
ENSG00000162174	ASRGL1	11	62104920	62160882	1	protein_coding	80150	ASRGL1	0.000386788	0.900304	2	5.345	4	3.8989e-06	0.0105131	GTEx/v8/Heart_Left_Ventricle	-	Yes	Mesendoderm:hESC	4.6e-24	rs117198764;rs12806663;rs10897232:rs11230920;rs386754192:rs1792909:rs10897232;rs7943493:rs386754192:rs12806663:rs12806663;rs10897232;rs7943493:rs10897232;rs536206626;rs1627693:rs536206626:rs536206626;rs1627693:rs117198764:rs11230985:rs7936908	23
ENSG00000133316	WDR74	11	62599814	62609281	-1	protein_coding	54663	WDR74	2.46017e-08	1.17895	0	0	0	NA	NA	NA	NA	Yes	Fetal_Cortex:Left_Ventricle:GM12878:Trophoblast-like_Cell	4.6e-24	rs117198764:rs145908530:rs10897232:rs11230920;rs386754192:rs1792909:rs10897232;rs7943493:rs386754192:rs12806663:rs12806663;rs10897232;rs7943493:rs10897232;rs536206626;rs1627693:rs536206626:rs536206626;rs1627693:rs11230985:rs7936908	23
ENSG00000168003	SLC3A2	11	62623518	62656352	1	protein_coding	6520	SLC3A2	0.923234	-0.438387	0	0	0	NA	NA	NA	NA	Yes	Left_Ventricle:GM12878:Trophoblast-like_Cell	4.6e-24	rs10897232:rs11230920;rs386754192:rs1792909:rs10897232;rs7943493:rs386754192:rs12806663:rs12806663;rs10897232;rs7943493:rs10897232;rs536206626;rs1627693:rs536206626:rs536206626;rs1627693:rs117198764:rs11230985:rs7936908	23
ENSG00000110721	CHKA	11	67820326	67888911	-1	protein_coding	1119	CHKA	0.787088	0.439173	0	0	13	7.36957e-06	0.0166566	GTEx/v8/Pancreas	-	Yes	Promoter_anchored_loops	5e-24	rs653264;rs648336:rs4930630:rs145847523:rs79808713:rs79051613:rs653264	24
ENSG00000132749	MTL5	11	68474908	68519032	-1	protein_coding	9633	MTL5	0.0332214	-0.688237	1	3.036	135	7.50262e-11	2.96408e-07	GTEx/v8/Adipose_Subcutaneous:GTEx/v8/Artery_Tibial	-	Yes	Promoter_anchored_loops:Spleen:IMR90:Mesenchymal_Stem_Cell:Mesendoderm:hESC	5e-24	rs149402055;rs648336;rs653264;rs4930630:rs79808713:rs648336:rs79051613:rs653264:rs149402055:rs17601808	24
ENSG00000172938	MRGPRD	11	68747490	68748455	-1	protein_coding	116512	MRGPRD	0.000404523	-0.14784	34	8.191	186	5.52149e-15	2.19138e-29	GTEx/v8/Adipose_Subcutaneous:GTEx/v8/Artery_Aorta:GTEx/v8/Artery_Coronary:GTEx/v8/Artery_Tibial	+	Yes	Promoter_anchored_loops	5e-24	rs79808713;rs4930630;rs11603763;rs653264;rs648336;rs79051613;rs143387014;rs648336:rs4930630:rs653264:rs117151155:rs145847523	24
ENSG00000110092	CCND1	11	69455855	69469242	1	protein_coding	595	CCND1	0.238186	-0.876019	0	0	0	NA	NA	NA	NA	Yes	Promoter_anchored_loops:IMR90:Mesenchymal_Stem_Cell:Trophoblast-like_Cell	5e-24	rs648336:rs4930630:rs145847523:rs79808713:rs79051613:rs653264:rs143387014:rs117476044:rs11603763;rs653264:rs11603763:rs17601808:rs149402055	24
ENSG00000168000	BSCL2	11	62457747	62477317	-1	protein_coding	26580	BSCL2	0.00852541	-0.902568	0	0	3	3.59281e-08	2.91548e-40	GTEx/v8/Adipose_Subcutaneous:GTEx/v8/Artery_Coronary:GTEx/v8/Artery_Tibial:GTEx/v8/Liver	+	Yes	IMR90:Mesenchymal_Stem_Cell	1.4e-23	rs7936908;rs145908530;rs35827276;rs117198764	23
ENSG00000162337	LRP5	11	68080077	68216743	1	protein_coding	4041	LRP5	0.998356	NA	0	0	0	NA	NA	NA	NA	Yes	Adult_Cortex:Fetal_Cortex:IMR90:Mesenchymal_Stem_Cell:Trophoblast-like_Cell	1.5e-23	rs648336:rs4930630:rs79051613:rs17601808	24
ENSG00000110075	PPP6R3	11	68228186	68382802	1	protein_coding	55291	PPP6R3	0.995715	0.442038	4	2.829	0	NA	NA	NA	NA	Yes	Adult_Cortex:Fetal_Cortex:Left_Ventricle:Liver:GM12878:IMR90:Mesenchymal_Stem_Cell:Mesendoderm:Trophoblast-like_Cell:hESC	1.5e-23	rs17601808;rs648336:rs4930630:rs79051613:rs17601808:rs149402055	24
ENSG00000162341	TPCN2	11	68816365	68858072	1	protein_coding	219931	TPCN2	2.06494e-06	0.177153	0	0	192	2.59566e-09	1.12415e-13	GTEx/v8/Adipose_Subcutaneous:GTEx/v8/Adipose_Visceral_Omentum:GTEx/v8/Artery_Aorta:GTEx/v8/Artery_Tibial	-	Yes	Promoter_anchored_loops:Adult_Cortex:Fetal_Cortex	1.5e-23	rs648336;rs4930630;rs11603763;rs79808713;rs653264;rs145847523:rs648336:rs143387014:rs4930630:rs79051613:rs79808713:rs11603763	24
ENSG00000149716	ORAOV1	11	69467844	69490184	-1	protein_coding	220064	ORAOV1	0.0329903	1.96034	0	0	0	NA	NA	NA	NA	Yes	Adult_Cortex:Fetal_Cortex:IMR90	1.5e-23	rs653264:rs648336:rs79051613;rs143387014:rs4930630:rs79051613:rs79808713:rs11603763:rs117476044:rs11603763;rs653264	24
ENSG00000062282	DGAT2	11	75470557	75512579	1	protein_coding	84649	DGAT2	7.51043e-08	-0.634946	58	13.56	0	NA	NA	NA	NA	No	NA	2.7e-22	rs190387940;rs12221567;rs72997616;rs10899105;rs28811614;rs117249464;rs10899133;11:75539742_GTA_G;11:75537738_CT_C	25
ENSG00000110066	SUV420H1	11	67922330	67981295	-1	protein_coding	51111	SUV420H1	0.99993	-1.02104	0	0	0	NA	NA	NA	NA	Yes	Left_Ventricle:Liver:GM12878:IMR90:Mesenchymal_Stem_Cell:Mesendoderm:Trophoblast-like_Cell:hESC	2.1e-21	rs17601808:rs149402055	24
ENSG00000149243	KLHL35	11	75133438	75141674	-1	protein_coding	283212	KLHL35	1.35039e-12	-0.180877	0	0	0	NA	NA	NA	NA	Yes	IMR90	4.4e-21	rs72997616;rs10899133;11:75539742_GTA_G;rs10899105:rs72997616;rs10899105;11:75537738_CT_C:rs72997616	25
ENSG00000198382	UVRAG	11	75526212	75854239	1	protein_coding	7405	UVRAG	0.858603	-0.177213	105	16.46	140	6.1014e-10	4.39681e-06	GTEx/v8/Artery_Aorta	-	Yes	Promoter_anchored_loops:EP_correlation_cell_type_oneway:GM12878:IMR90:Mesenchymal_Stem_Cell:Mesendoderm:Trophoblast-like_Cell:hESC	4.4e-21	rs72997616;rs10899133;11:75539742_GTA_G;rs10899105;11:75537738_CT_C;rs141370279;rs72997672;11:75553487_CT_C;rs12279310;rs7119809;rs28811614;rs190387940;rs7119809:rs12279310:11:75537738_CT_C:rs72997616;rs10899105:rs72997616;11:75537738_CT_C:rs72997616	25
ENSG00000085741	WNT11	11	75897369	75921780	-1	protein_coding	7481	WNT11	0.11858	-0.390232	0	0	0	NA	NA	NA	NA	Yes	GM12878:IMR90:Mesenchymal_Stem_Cell	4.4e-21	rs72997616;rs10899133;11:75539742_GTA_G;rs10899105:rs72997616;rs10899105;11:75537738_CT_C:rs72997616;rs10899105:rs141370279:rs10899133:11:75537738_CT_C:11:75539742_GTA_G:rs72997672:11:75553487_CT_C	25
ENSG00000137492	PRKRIR	11	76061000	76092015	-1	protein_coding	5612	PRKRIR	0.968969	-0.304435	0	0	0	NA	NA	NA	NA	Yes	Adult_Cortex:Fetal_Cortex:GM12878:IMR90:Mesenchymal_Stem_Cell:Mesendoderm	4.4e-21	rs72997616;rs10899133;11:75539742_GTA_G;rs10899105:rs7119809:rs12279310:rs72997616;rs10899105;11:75537738_CT_C:rs141370279:rs10899133:11:75537738_CT_C:11:75539742_GTA_G:rs72997616;rs10899105:rs72997672:11:75553487_CT_C	25
ENSG00000179240	RP11-111M22.2	11	76092357	76125663	1	protein_coding	100506127	GVQW3	NA	NA	0	0	0	NA	NA	NA	NA	Yes	Adult_Cortex:Fetal_Cortex:GM12878:IMR90:Mesenchymal_Stem_Cell:Mesendoderm	4.4e-21	rs72997616;rs10899133;11:75539742_GTA_G;rs10899105:rs7119809:rs12279310:rs72997616;rs10899105;11:75537738_CT_C:rs141370279:rs10899133:11:75537738_CT_C:11:75539742_GTA_G:rs72997616;rs10899105:rs72997672:11:75553487_CT_C	25
ENSG00000137507	LRRC32	11	76368568	76381791	-1	protein_coding	2615	LRRC32	0.0215755	1.34736	0	0	0	NA	NA	NA	NA	Yes	IMR90:Mesenchymal_Stem_Cell	4.4e-21	rs72997616;rs10899133;11:75539742_GTA_G;rs10899105:rs72997616;rs10899105;11:75537738_CT_C:rs72997616;rs10899105:rs141370279:rs10899133:11:75537738_CT_C:11:75539742_GTA_G:rs72997672:11:75553487_CT_C	25
ENSG00000234857	HNRNPUL2-BSCL2	11	62457747	62494856	-1	protein_coding	100534595	HNRNPUL2-BSCL2	NA	NA	0	0	0	NA	NA	NA	NA	Yes	Promoter_anchored_loops:GM12878	2.3e-20	rs1792909;rs11230920;rs386754192:rs61893681:rs536206626;rs1627693:rs10897232;rs7943493:rs10909647;rs61893681:rs117198764	23
ENSG00000162222	TTC9C	11	62495541	62507765	1	protein_coding	283237	TTC9C	0.000139735	-0.148557	0	0	0	NA	NA	NA	NA	Yes	Promoter_anchored_loops:GM12878	2.3e-20	rs1792909;rs11230920;rs386754192:rs61893681:rs536206626;rs1627693:rs10897232;rs7943493:rs10909647;rs61893681:rs117198764	23
ENSG00000137486	ARRB1	11	74975226	75062873	-1	protein_coding	408	ARRB1	0.986802	-0.498854	0	0	8	5.38751e-05	0.0390548	GTEx/v8/Artery_Aorta	-	Yes	EP_correlation_cell_type_oneway	2.7e-20	rs72997616;rs10899133;11:75539742_GTA_G;rs10899105;11:75537738_CT_C	25
ENSG00000168569	TMEM223	11	62539101	62559493	-1	protein_coding	79064	TMEM223	0.0124355	-0.202932	0	0	0	NA	NA	NA	NA	Yes	Adult_Cortex:GM12878	2.6e-19	rs61895466:rs259869;rs11230885:rs116262432:rs259869:rs386754192:rs1792909:rs10897232;rs7943493:rs11230920;rs386754192:rs117198764	23
ENSG00000185475	TMEM179B	11	62554887	62557877	1	protein_coding	374395	TMEM179B	0.0107812	0.0443474	0	0	0	NA	NA	NA	NA	Yes	Adult_Cortex:GM12878	2.6e-19	rs61895466:rs259869;rs11230885:rs116262432:rs259869:rs386754192:rs1792909:rs10897232;rs7943493:rs11230920;rs386754192:rs117198764	23
ENSG00000162344	FGF19	11	69513000	69519410	-1	protein_coding	9965	FGF19	0.294077	-0.727218	0	0	0	NA	NA	NA	NA	Yes	Promoter_anchored_loops:IMR90	2.3e-17	rs648336:rs4930630:rs145847523:rs143387014:rs11603763;rs653264:rs653264:rs79808713:rs11603763:rs117476044	24
ENSG00000229859	PGA3	11	60970779	60980570	1	protein_coding	643834	PGA3	0.645341	1.44448	2	2.087	2	2.71403e-05	0.00268248	GTEx/v8/Adipose_Visceral_Omentum	-	No	NA	1.7e-16	rs56672345;rs9326418	23
ENSG00000166889	PATL1	11	59404189	59436453	-1	protein_coding	219988	PATL1	0.991974	-0.367218	0	0	0	NA	NA	NA	NA	Yes	Fetal_Cortex:Mesenchymal_Stem_Cell	3.1e-16	rs146156958:rs79387516:rs71490328;rs7943992:rs71490328:rs7943992:rs80264062:rs7116318	23
ENSG00000186895	FGF3	11	69624992	69633792	-1	protein_coding	2248	FGF3	0.0330372	NA	0	0	0	NA	NA	NA	NA	Yes	Promoter_anchored_loops	1.6e-14	rs648336:rs4930630:rs653264:rs117151155:rs145847523:rs79808713:rs11603763	24
ENSG00000171067	C11orf24	11	68028803	68039469	-1	protein_coding	53838	C11orf24	0.0307663	NA	0	0	2	0.000187489	7.21112e-47	GTEx/v8/Artery_Tibial	+	Yes	Promoter_anchored_loops:Mesenchymal_Stem_Cell:Trophoblast-like_Cell	2.3e-14	rs17601808;rs648336:rs653264:rs17601808	24
ENSG00000110107	PRPF19	11	60658202	60674060	-1	protein_coding	27339	PRPF19	0.998567	-0.241204	0	0	1	1.6336e-05	0.0497184	GTEx/v8/Artery_Coronary	-	Yes	Adult_Cortex:Spleen:GM12878:IMR90:Mesenchymal_Stem_Cell:Trophoblast-like_Cell	4.5e-14	rs543711028;rs12805902:rs56672345:rs2232143:rs146156958:rs79387516	23
ENSG00000256713	PGA5	11	61008514	61018920	1	protein_coding	5222	PGA5	0.00127358	0.0513857	0	0	2	2.20291e-06	7.47517e-12	GTEx/v8/Adipose_Subcutaneous:GTEx/v8/Adipose_Visceral_Omentum	-	No	NA	2.5e-13	rs79387516	23
ENSG00000166961	MS4A15	11	60524426	60544205	1	protein_coding	219995	MS4A15	0.0384682	-0.122458	0	0	0	NA	NA	NA	NA	Yes	GM12878:IMR90:Mesenchymal_Stem_Cell:Trophoblast-like_Cell:hESC	1.8e-12	rs886264:rs12805902:rs56672345:rs2232143:rs146156958:rs79387516	23
ENSG00000172689	MS4A10	11	60552821	60568778	1	protein_coding	341116	MS4A10	1.79435e-08	3.12367	0	0	0	NA	NA	NA	NA	Yes	GM12878:IMR90:Mesenchymal_Stem_Cell:Trophoblast-like_Cell:hESC	1.8e-12	rs886264:rs12805902:rs56672345:rs2232143:rs146156958:rs79387516	23
ENSG00000110104	CCDC86	11	60609544	60618554	1	protein_coding	79080	CCDC86	0.00147736	1.05991	0	0	0	NA	NA	NA	NA	Yes	Adult_Cortex:Fetal_Cortex:GM12878:IMR90	1.8e-12	rs79387516:rs12805902:rs146156958	23
ENSG00000183134	PTGDR2	11	60618413	60623444	-1	protein_coding	11251	PTGDR2	0.18411	-0.0973357	0	0	0	NA	NA	NA	NA	Yes	Promoter_anchored_loops:GM12878:IMR90	1.8e-12	rs56672345:rs12805902:rs146156958:rs79387516	23
ENSG00000149506	ZP1	11	60635035	60643166	1	protein_coding	22917	ZP1	4.95779e-10	-0.172753	0	0	0	NA	NA	NA	NA	Yes	Adult_Cortex:GM12878:IMR90	1.8e-12	rs886264:rs12805902:rs146156958:rs79387516	23
ENSG00000110448	CD5	11	60869867	60895324	1	protein_coding	921	CD5	2.72798e-05	-1.16504	3	17.88	0	NA	NA	NA	NA	Yes	Fetal_Cortex:GM12878:IMR90:Mesenchymal_Stem_Cell:Mesendoderm:Trophoblast-like_Cell:hESC	1.8e-12	rs12805902;rs56672345;rs2232143;rs79387516:rs886264:rs12805902:rs56672345:rs2232143:rs146156958	23
ENSG00000167987	VPS37C	11	60897728	60929089	-1	protein_coding	55048	VPS37C	0.197171	-0.999412	4	17.88	0	NA	NA	NA	NA	Yes	Adult_Cortex:Fetal_Cortex:GM12878:IMR90:Mesenchymal_Stem_Cell:Trophoblast-like_Cell	1.8e-12	rs12805902;rs56672345;rs2232143;rs12805902:rs79387516:rs146156958:rs56672345:rs2232143	23
ENSG00000110243	APOA5	11	116660083	116663136	-1	protein_coding	116519	APOA5	1.37735e-06	0.42373	2	11.92	0	NA	NA	NA	NA	Yes	Promoter_anchored_loops:Aorta:Hippocampus:Left_Ventricle:Liver:Pancreas:Right_Ventricle:Spleen:GM12878:IMR90:Mesenchymal_Stem_Cell:Mesendoderm:Trophoblast-like_Cell:hESC	1.9e-11	rs11604424;rs525028:rs11604424	26
ENSG00000110245	APOC3	11	116700422	116703788	1	protein_coding	345	APOC3	0.000678026	0.121255	9	8.191	0	NA	NA	NA	NA	Yes	Liver:Spleen:IMR90:Mesenchymal_Stem_Cell:Mesendoderm	1.9e-11	rs525028	26
ENSG00000118137	APOA1	11	116706467	116708666	-1	protein_coding	335	APOA1	0.0487384	0.161101	9	8.191	13	1.50115e-13	9.81014e-29	GTEx/v8/Heart_Atrial_Appendage:GTEx/v8/Heart_Left_Ventricle	+	Yes	Liver:Spleen:IMR90:Mesenchymal_Stem_Cell:Mesendoderm	1.9e-11	rs525028	26
ENSG00000160584	SIK3	11	116714118	116969153	-1	protein_coding	23387	SIK3	0.999883	0.278236	12	7.526	11	2.63569e-10	1.08311e-06	GTEx/v8/Heart_Left_Ventricle	-	Yes	Promoter_anchored_loops:Adult_Cortex:Fetal_Cortex:Aorta:Hippocampus:Left_Ventricle:Liver:Pancreas:Right_Ventricle:Spleen:GM12878:IMR90:Mesenchymal_Stem_Cell:Mesendoderm:Trophoblast-like_Cell:hESC	1.9e-11	rs525028;rs525028:rs11604424	26
ENSG00000168092	PAFAH1B2	11	117014983	117047610	1	protein_coding	5049	PAFAH1B2	0.962029	3.35677	0	0	0	NA	NA	NA	NA	Yes	Promoter_anchored_loops:Adult_Cortex:Fetal_Cortex:Left_Ventricle:Liver:GM12878:IMR90:Mesenchymal_Stem_Cell:Mesendoderm:Trophoblast-like_Cell:hESC	1.9e-11	rs11604424:rs525028	26
ENSG00000149577	SIDT2	11	117049449	117068160	1	protein_coding	51092	SIDT2	0.0025724	-0.315318	0	0	12	6.56458e-09	1.17121e-22	GTEx/v8/Adipose_Visceral_Omentum:GTEx/v8/Pancreas	-	Yes	Adult_Cortex:Fetal_Cortex:Left_Ventricle:Liver:Spleen:GM12878:IMR90:Mesenchymal_Stem_Cell:Mesendoderm:Trophoblast-like_Cell:hESC	1.9e-11	rs525028;rs11604424:rs525028	26
ENSG00000110060	PUS3	11	125763381	125773116	-1	protein_coding	83480	PUS3	1.08656e-05	0.575634	0	0	0	NA	NA	NA	NA	Yes	IMR90:Mesenchymal_Stem_Cell	1.1e-10	rs78689694	27
ENSG00000109832	DDX25	11	125773271	125793158	1	protein_coding	29118	DDX25	4.23434e-09	NA	0	0	0	NA	NA	NA	NA	Yes	IMR90:Mesenchymal_Stem_Cell	1.1e-10	rs78689694	27
ENSG00000110080	ST3GAL4	11	126225535	126310239	1	protein_coding	6484	ST3GAL4	0.439049	-0.0274587	28	12.76	26	7.88211e-34	2.54943e-27	GTEx/v8/Artery_Tibial:GTEx/v8/Heart_Atrial_Appendage:GTEx/v8/Heart_Left_Ventricle:GTEx/v8/Liver:GTEx/v8/Pancreas	+	No	NA	1.1e-10	rs78689694	27
ENSG00000149571	KIRREL3	11	126293254	126873355	-1	protein_coding	84623	KIRREL3	0.977506	1.27303	0	0	0	NA	NA	NA	NA	Yes	IMR90:Mesenchymal_Stem_Cell:Mesendoderm	1.1e-10	rs78689694	27
ENSG00000151702	FLI1	11	128556430	128683162	1	protein_coding	2313	FLI1	0.819814	-0.992408	0	0	0	NA	NA	NA	NA	Yes	Mesenchymal_Stem_Cell	1.1e-10	rs78689694	27
ENSG00000137656	BUD13	11	116618886	116643704	-1	protein_coding	84811	BUD13	0.00229543	NA	2	11.92	0	NA	NA	NA	NA	Yes	Adult_Cortex:Aorta:Hippocampus:Left_Ventricle:Liver:Pancreas:Right_Ventricle:Spleen:GM12878:IMR90:Mesenchymal_Stem_Cell:Mesendoderm:Trophoblast-like_Cell:hESC	1.7e-10	rs11604424;rs525028:rs11604424	26
ENSG00000109917	ZNF259	11	116648436	116658766	-1	protein_coding	8882	ZNF259	0.0193035	0.00239464	2	11.92	1	5.17357e-05	0.000361971	GTEx/v8/Adipose_Subcutaneous	-	Yes	Adult_Cortex:Aorta:Hippocampus:Left_Ventricle:Liver:Pancreas:Right_Ventricle:Spleen:GM12878:IMR90:Mesenchymal_Stem_Cell:Mesendoderm:Trophoblast-like_Cell:hESC	1.7e-10	rs11604424;rs525028:rs11604424	26
ENSG00000110244	APOA4	11	116691419	116694022	-1	protein_coding	337	APOA4	3.57595e-05	0.0816551	4	8.191	0	NA	NA	NA	NA	Yes	Promoter_anchored_loops:Liver:Spleen:IMR90:Mesenchymal_Stem_Cell:Mesendoderm	1.7e-10	rs525028	26
ENSG00000149591	TAGLN	11	117070037	117075498	1	protein_coding	6876	TAGLN	0.241538	-0.64579	0	0	11	6.90657e-06	7.71611e-14	GTEx/v8/Pancreas	-	Yes	Adult_Cortex:Left_Ventricle:Liver:Spleen:GM12878:IMR90:Mesenchymal_Stem_Cell:Mesendoderm:Trophoblast-like_Cell:hESC	1.7e-10	rs525028;rs525028:rs11604424	26
ENSG00000162236	STX5	11	62574369	62599560	-1	protein_coding	6811	STX5	0.362948	-0.443812	0	0	1	7.59686e-05	0.0297951	GTEx/v8/Artery_Tibial	+	No	NA	6.8e-10	rs116920297	23
ENSG00000110446	SLC15A3	11	60704556	60720002	-1	protein_coding	51296	SLC15A3	3.65752e-07	-0.153115	0	0	0	NA	NA	NA	NA	Yes	Promoter_anchored_loops:Adult_Cortex:Fetal_Cortex:Spleen:GM12878:IMR90:Mesenchymal_Stem_Cell:Mesendoderm:Trophoblast-like_Cell	2.6e-09	rs56672345:rs7116318:rs79387516:rs12805902:rs2232143	23
ENSG00000013725	CD6	11	60739115	60787849	1	protein_coding	923	CD6	0.00430466	-0.77189	0	0	0	NA	NA	NA	NA	Yes	Spleen:GM12878:IMR90	2.6e-09	rs12805902:rs56672345:rs2232143	23
ENSG00000268351	AP001888.1	11	69587254	69587718	-1	protein_coding	NA	NA	NA	NA	0	0	0	NA	NA	NA	NA	Yes	Promoter_anchored_loops	1.6e-08	rs648336:rs4930630:rs79808713	24
ENSG00000075388	FGF4	11	69587797	69590171	-1	protein_coding	2249	FGF4	0.750216	NA	0	0	0	NA	NA	NA	NA	Yes	Promoter_anchored_loops	1.6e-08	rs648336:rs4930630:rs79808713	24
ENSG00000166741	NNMT	11	114128509	114184007	1	protein_coding	4837	NNMT	0.00427916	-0.273618	0	0	0	NA	NA	NA	NA	Yes	IMR90:Mesenchymal_Stem_Cell	1.8e-08	rs11604424	26
ENSG00000180425	C11orf71	11	114262165	114271139	-1	protein_coding	54494	C11orf71	0.00842482	-0.124749	0	0	0	NA	NA	NA	NA	Yes	IMR90:Mesenchymal_Stem_Cell	1.8e-08	rs11604424	26
ENSG00000076053	RBM7	11	114270752	114284925	1	protein_coding	10179	RBM7	0.769935	-0.240423	0	0	0	NA	NA	NA	NA	Yes	IMR90:Mesenchymal_Stem_Cell	1.8e-08	rs11604424	26
ENSG00000255663	RP11-212D19.4	11	114271404	114314654	1	protein_coding	NA	NA	NA	NA	0	0	0	NA	NA	NA	NA	Yes	IMR90:Mesenchymal_Stem_Cell	1.8e-08	rs11604424	26
ENSG00000076043	REXO2	11	114310108	114321001	1	protein_coding	25996	REXO2	0.888429	-0.470637	0	0	0	NA	NA	NA	NA	Yes	IMR90:Mesenchymal_Stem_Cell	1.8e-08	rs11604424	26
ENSG00000160613	PCSK7	11	117075053	117103241	-1	protein_coding	9159	PCSK7	0.19137	NA	0	0	0	NA	NA	NA	NA	Yes	Spleen:IMR90:Mesenchymal_Stem_Cell:Mesendoderm:Trophoblast-like_Cell:hESC	1.8e-08	rs525028:rs11604424	26
ENSG00000167257	RNF214	11	117103341	117157161	1	protein_coding	257160	RNF214	0.830018	NA	0	0	0	NA	NA	NA	NA	Yes	Spleen:IMR90:Mesenchymal_Stem_Cell:Mesendoderm:Trophoblast-like_Cell:hESC	1.8e-08	rs525028:rs11604424	26
ENSG00000186318	BACE1	11	117156402	117186975	-1	protein_coding	23621	BACE1	0.944279	-0.91909	0	0	0	NA	NA	NA	NA	Yes	IMR90:Mesenchymal_Stem_Cell	1.8e-08	rs11604424	26
ENSG00000110274	CEP164	11	117185273	117283984	1	protein_coding	22897	CEP164	9.66879e-18	0.753352	0	0	0	NA	NA	NA	NA	Yes	IMR90:Mesenchymal_Stem_Cell	1.8e-08	rs11604424	26
ENSG00000254873	RP11-770J1.5	11	118267810	118272610	-1	protein_coding	NA	NA	NA	NA	0	0	0	NA	NA	NA	NA	Yes	IMR90:Mesenchymal_Stem_Cell	1.8e-08	rs11604424	26
ENSG00000167283	ATP5L	11	118271869	118302211	1	protein_coding	10632	ATP5L	0.337891	-0.416063	0	0	0	NA	NA	NA	NA	Yes	IMR90:Mesenchymal_Stem_Cell	1.8e-08	rs11604424	26
ENSG00000255384	RP11-770J1.4	11	118303836	118305921	-1	protein_coding	NA	NA	NA	NA	0	0	0	NA	NA	NA	NA	Yes	IMR90	1.8e-08	rs11604424	26
ENSG00000118058	KMT2A	11	118307205	118397539	1	protein_coding	4297	KMT2A	1	-1.78895	0	0	0	NA	NA	NA	NA	Yes	IMR90	1.8e-08	rs11604424	26
ENSG00000048028	USP28	11	113668596	113746292	-1	protein_coding	57646	USP28	0.0316575	0.869552	0	0	0	NA	NA	NA	NA	Yes	Mesenchymal_Stem_Cell	3.7e-07	rs11604424	26
ENSG00000109906	ZBTB16	11	113930315	114121398	1	protein_coding	7704	ZBTB16	0.980087	NA	0	0	0	NA	NA	NA	NA	Yes	Mesenchymal_Stem_Cell	3.7e-07	rs11604424	26
ENSG00000137491	SLCO2B1	11	74811608	74917594	1	protein_coding	11309	SLCO2B1	0.00335356	0.0507582	0	0	1	0.000111469	0.0450674	GTEx/v8/Heart_Left_Ventricle	+	No	NA	7.5e-07	rs117249464	25
ENSG00000162188	GNG3	11	62475130	62476673	1	protein_coding	2785	GNG3	0.527227	-0.216836	0	0	0	NA	NA	NA	NA	Yes	IMR90:Mesenchymal_Stem_Cell	4.9e-06	rs117198764	23
ENSG00000185670	ZBTB3	11	62515791	62521660	-1	protein_coding	79842	ZBTB3	0.243281	-0.0264672	0	0	0	NA	NA	NA	NA	Yes	GM12878	4.9e-06	rs117198764	23
ENSG00000168002	POLR2G	11	62529016	62534182	1	protein_coding	5436	POLR2G	0.0064654	NA	0	0	0	NA	NA	NA	NA	Yes	GM12878	4.9e-06	rs117198764	23
ENSG00000162227	TAF6L	11	62538775	62554814	1	protein_coding	10629	TAF6L	0.819819	0.0061967	0	0	0	NA	NA	NA	NA	Yes	GM12878	4.9e-06	rs117198764	23
ENSG00000134780	DAGLA	11	61447905	61514473	1	protein_coding	747	DAGLA	0.953148	-0.966158	147	19.23	161	2.33097e-12	4.58321e-08	GTEx/v8/Heart_Atrial_Appendage:GTEx/v8/Pancreas	-	Yes	Promoter_anchored_loops:Adult_Cortex:Fetal_Cortex:Left_Ventricle:Spleen:IMR90:Mesenchymal_Stem_Cell	2.69999999999981e-311	rs574003650;rs3018327;rs35703574;rs78763563;rs17156254;rs12271414;11:61441790_GTGGA_G;rs198435;rs199969886;11:61445143_AT_A;rs2238001;rs198441;rs769908354;rs75618234;rs543711028;rs117186302;rs140007352;rs112687416;rs150156331;rs72918076;rs3018326;rs17827918;rs198459;rs198476;rs181935125;rs198422;rs117494202;rs9326418;rs77053629;rs77990365;rs11230741;rs72914277;rs762923346;11:61409901_GT_G;rs54624…	23
ENSG00000124935	SCGB1D2	11	62009682	62012280	1	protein_coding	10647	SCGB1D2	0.0961137	0.413895	10	4.211	0	NA	NA	NA	NA	Yes	EP_correlation_cell_type_oneway:EP_correlation_organ_oneway:Adult_Cortex:Aorta:Left_Ventricle:Liver:Right_Ventricle:GM12878:IMR90:Mesenchymal_Stem_Cell:Mesendoderm:Neural_Progenitor_Cell:Trophoblast-like_Cell:hESC	2.69999999999981e-311	rs12806663;rs7936908;rs2727263:rs174597:11:61602496_CCTCCCTGCCTCCCCAGGGACTT_C:rs113003506:rs174453:rs36047269:rs75992720;rs78596000:rs386754192:rs1792909:rs10897232;rs7943493:rs11230920;rs386754192:rs117198764:rs10897232:rs12806663:rs12806663;rs10897232;rs7943493:rs10897232;rs536206626;rs1627693:rs536206626:rs536206626;rs1627693:rs11230985:rs7936908:rs61893681:rs10909647;rs61893681:rs1792909;rs11…	23
ENSG00000110484	SCGB2A2	11	62037627	62040628	1	protein_coding	4250	SCGB2A2	0.00892428	0.135576	13	4.902	0	NA	NA	NA	NA	Yes	EP_correlation_cell_type_oneway:Aorta:Left_Ventricle:Liver:Right_Ventricle:GM12878:IMR90:Mesenchymal_Stem_Cell:Mesendoderm:Neural_Progenitor_Cell:Trophoblast-like_Cell:hESC	2.69999999999981e-311	rs7936908;rs12806663;rs117198764;rs571932724;rs2727263:rs174597:11:61602496_CCTCCCTGCCTCCCCAGGGACTT_C:rs113003506:rs174453:rs36047269:rs10897232:rs11230920;rs386754192:rs1792909:rs10897232;rs7943493:rs386754192:rs12806663:rs12806663;rs10897232;rs7943493:rs10897232;rs536206626;rs1627693:rs536206626:rs536206626;rs1627693:rs117198764:rs11230985:rs7936908:rs61893681:rs10909647;rs61893681:rs1792909;rs…	23
ENSG00000149499	EML3	11	62369690	62380237	-1	protein_coding	256364	EML3	0.394341	NA	0	0	0	NA	NA	NA	NA	Yes	Promoter_anchored_loops	3.40001155498571e-319	rs17762402:rs61896141:rs117110139:rs740006:rs73487492;rs75992720:rs2727263:rs174597:rs117983270:rs75992720:rs695867;rs11230803:rs375103265:rs1076180:rs540613:rs35371411:rs2524287:rs2727258:rs174480:rs2736598;rs2727258:rs76133863:rs11230827:rs149037697:rs74556176;rs182407676:rs2736598:rs2524292:rs2727274:rs17156580:rs386754192:rs1792909:rs10897232;rs7943493:rs11230920;rs386754192:rs117198764	23
ENSG00000149541	B3GAT3	11	62382768	62389647	-1	protein_coding	26229	B3GAT3	0.000286975	-0.288759	0	0	17	3.02745e-05	6.8129e-07	GTEx/v8/Artery_Aorta:GTEx/v8/Heart_Atrial_Appendage	+	Yes	Promoter_anchored_loops	3.40001155498571e-319	11:61409901_GT_G;rs198435;rs628993;11:61637710_CA_C;rs6591688;rs17762402:rs61896141:rs117110139:rs740006:rs73487492;rs75992720:rs2727263:rs174597:rs117983270:rs75992720:rs695867;rs11230803:rs375103265:rs1076180:rs540613:rs35371411:rs2524287:rs2727258:rs174480:rs2736598;rs2727258:rs76133863:rs11230827:rs149037697:rs74556176;rs182407676:rs2736598:rs2524292:rs2727274:rs17156580:rs386754192:rs1792909…	23
ENSG00000134825	TMEM258	11	61535973	61560274	-1	protein_coding	746	TMEM258	0.000864646	0.122739	41	19.93	43	2.46709e-10	4.06714e-09	GTEx/v8/Adipose_Subcutaneous:GTEx/v8/Adipose_Visceral_Omentum:GTEx/v8/Artery_Aorta:GTEx/v8/Artery_Tibial:GTEx/v8/Heart_Atrial_Appendage	-	Yes	EP_links_oneway:Promoter_anchored_loops:Adult_Cortex:Fetal_Cortex:Aorta:Hippocampus:Left_Ventricle:Liver:Right_Ventricle:Spleen:GM12878:IMR90:Mesenchymal_Stem_Cell:Mesendoderm:Neural_Progenitor_Cell:Trophoblast-like_Cell:hESC	4.94065645841247e-324	rs695186;rs9326418;rs181935125;rs198476;rs198441;rs61896137;rs2269928;rs79519287;11:61537648_TG_T;rs174532;rs628993;rs139424418;rs78596000;rs61896141;rs695867;rs509360;rs61747222;rs17762402;rs117110139;rs740006;rs7102974;rs412334;rs75938339;rs174597;rs174607;rs174453;rs11407273;rs2727263;rs36047269;rs259889:rs61895466:rs10909647:rs17156254:rs769908354;rs3018327:rs769908354:rs198441:rs117494202:rs…	23
ENSG00000168496	FEN1	11	61560109	61564716	1	protein_coding	2237	FEN1	3.47774e-05	-0.45994	10	15.26	0	NA	NA	NA	NA	Yes	EP_links_oneway:Promoter_anchored_loops:Adult_Cortex:Fetal_Cortex:Aorta:Hippocampus:Left_Ventricle:Liver:Right_Ventricle:Spleen:GM12878:IMR90:Mesenchymal_Stem_Cell:Mesendoderm:Neural_Progenitor_Cell:Trophoblast-like_Cell:hESC	4.94065645841247e-324	rs17762402;rs61896141;rs117110139;rs740006;rs7102974;rs412334;rs695867;rs75938339;rs2727263;rs259889:rs61895466:rs10909647:rs17156254:rs769908354;rs3018327:rs769908354:rs198441:rs117494202:rs198435;rs2238001;rs199969886:rs198422:rs198459:rs9326418:rs77053629:rs7935835:rs33972521;rs6591688:rs4343027:rs6591688:rs71490346:rs750567872;rs12226389:rs34848597:rs11230885:rs140534658:rs750567872:rs7505678…	23
ENSG00000134824	FADS2	11	61560452	61634826	1	protein_coding	9415	FADS2	0.990052	-0.476246	173	15.66	111	3.82558e-35	2.60172e-28	GTEx/v8/Adipose_Subcutaneous:GTEx/v8/Adipose_Visceral_Omentum:GTEx/v8/Artery_Aorta:GTEx/v8/Artery_Coronary:GTEx/v8/Artery_Tibial:GTEx/v8/Heart_Atrial_Appendage:GTEx/v8/Heart_Left_Ventricle:GTEx/v8/Pancreas	-	Yes	EP_links_oneway:Promoter_anchored_loops:Adult_Cortex:Fetal_Cortex:Aorta:Hippocampus:Left_Ventricle:Liver:Right_Ventricle:Spleen:GM12878:IMR90:Mesenchymal_Stem_Cell:Mesendoderm:Neural_Progenitor_Cell:Trophoblast-like_Cell:hESC	4.94065645841247e-324	rs17762402;rs61896141;rs117110139;rs740006;rs7102974;rs412334;rs695867;rs75938339;rs2727263;rs138012803;rs75992720;rs78596000;rs11230803;rs61897792;rs174569;rs174597;11:61602496_CCTCCCTGCCTCCCCAGGGACTT_C;rs72920193;rs35827276;rs139957766;rs11607437;rs73487492;rs117983270;rs375103265;rs174602;rs498793;rs526126;rs11407273;11:61637710_CA_C;rs174607;rs7942717;rs74771917;rs113003506;rs11230813;rs36047…	23
ENSG00000149485	FADS1	11	61567099	61596790	-1	protein_coding	3992	FADS1	0.383801	-0.763753	38	15.38	151	3.38614e-20	5.32071e-39	GTEx/v8/Adipose_Subcutaneous:GTEx/v8/Adipose_Visceral_Omentum:GTEx/v8/Artery_Tibial:GTEx/v8/Heart_Left_Ventricle:GTEx/v8/Pancreas	+	Yes	Promoter_anchored_loops:EP_correlation_cell_type_oneway:Aorta:Hippocampus:Left_Ventricle:Liver:Right_Ventricle:Spleen:GM12878:IMR90:Mesenchymal_Stem_Cell:Mesendoderm:Neural_Progenitor_Cell:Trophoblast-like_Cell:hESC	4.94065645841247e-324	rs117110139;rs740006;rs7102974;rs412334;rs695867;rs75938339;rs2727263;rs138012803;rs75992720;rs78596000;rs11230803;rs61897792;rs174569;rs61896141;rs174597;11:61602496_CCTCCCTGCCTCCCCAGGGACTT_C;rs72920193;rs35827276;rs11407273;rs11230741;rs198476;rs174532;rs174607;rs36047269;rs174453;11:61742244_CAA_C;rs56215258;rs35686945;rs71490346;rs778782193;rs12576538;rs4963440;rs33972521;rs139957766;11:61648…	23
ENSG00000221968	FADS3	11	61640991	61659523	-1	protein_coding	3995	FADS3	0.0488722	NA	92	15.66	2	1.15184e-05	0.000283143	GTEx/v8/Liver	NA	Yes	EP_links_oneway:Promoter_anchored_loops:Adult_Cortex:Fetal_Cortex:Aorta:Dorsolateral_Prefrontal_Cortex:Left_Ventricle:Liver:Lung:Spleen:GM12878:IMR90:Mesenchymal_Stem_Cell:Mesendoderm:Trophoblast-like_Cell:hESC	4.94065645841247e-324	11:61637710_CA_C;rs7115739;rs74771917;rs7928482;11:61631658_GT_G;rs36047269;rs17764288;rs113003506;rs11407273;rs174624;rs7118175;11:61648649_AAATG_A;11:61635832_CAA_C;rs174453;rs174607;rs75306442;rs61897792;rs7942717;rs528285;rs116962591;rs529349261;rs412334;rs174468;rs174472;rs174473;rs174477;rs2727263;rs2736598;rs2727258:rs2727258:rs11230827;rs182407676:rs2736598:rs17156580:rs195161;rs2736595:r…	23
ENSG00000149503	INCENP	11	61891445	61920635	1	protein_coding	3619	INCENP	0.996087	0.518653	150	22.6	188	1.00867e-35	4.73321e-29	GTEx/v8/Adipose_Subcutaneous:GTEx/v8/Adipose_Visceral_Omentum:GTEx/v8/Artery_Aorta:GTEx/v8/Artery_Tibial:GTEx/v8/Heart_Atrial_Appendage:GTEx/v8/Heart_Left_Ventricle	-	Yes	Promoter_anchored_loops	4.94065645841247e-324	rs61895504;rs61893661;rs7943493;rs1627693;rs61893681;rs72928167;rs11230920;rs116262432;rs10897232;rs10909647;rs536206626;rs1792909;rs386754192;rs117198764;rs11230885;rs12226389;rs259869;rs12806663;rs10792328;rs71490346;rs4963452;rs387137;rs61895466;rs11407273;rs12362237:rs11604913:rs78596000:rs61896141:rs695867:rs509360:rs61747222:rs174532:rs174597:rs75992720;rs78596000:rs2727263:11:61602496_CCTC…	23
ENSG00000168515	SCGB1D1	11	61957688	61961011	1	protein_coding	10648	SCGB1D1	1.19496e-05	0.599545	45	12.17	0	NA	NA	NA	NA	Yes	Left_Ventricle:Liver:Spleen:GM12878:IMR90:Mesenchymal_Stem_Cell:Mesendoderm:Trophoblast-like_Cell:hESC	4.94065645841247e-324	rs11230920;rs386754192;rs117198764;rs10897232;rs7943493;rs536206626;rs1627693;rs1792909;rs12806663;rs10897232:rs11230920;rs386754192:rs1792909:rs10897232;rs7943493:rs386754192:rs12806663:rs12806663;rs7943493:rs10897232;rs1627693:rs536206626:rs536206626;rs1627693:rs117198764:rs11230985:rs7936908:rs571932724:11:61637710_CA_C:rs113003506:rs11407273:rs75306442:rs7115739:rs36047269:rs61897792:rs174453…	23
ENSG00000149021	SCGB1A1	11	62172575	62190667	1	protein_coding	7356	SCGB1A1	0.00766133	-0.0375063	1	3.833	0	NA	NA	NA	NA	Yes	Promoter_anchored_loops	5.49999999999897e-313	rs145908530;rs174569:rs61896141:rs78596000:rs174597:rs75992720;rs78596000:rs11230803:rs36047269:rs7115739;rs74771917:11:61637710_CA_C:rs7928482:11:61631658_GT_G:rs17764288:rs113003506:rs11407273:rs174624:rs7118175;11:61648649_AAATG_A:11:61635832_CAA_C:rs174453:rs7118175:rs174607:rs117198764	23
ENSG00000128918	ALDH1A2	15	58245622	58790065	-1	protein_coding	8854	ALDH1A2	0.51663	1.67145	586	18.09	62	1.74747e-09	4.07162e-05	GTEx/v8/Liver	-	Yes	Adult_Cortex:Aorta:Dorsolateral_Prefrontal_Cortex:Left_Ventricle:Liver:Pancreas:Right_Ventricle:Spleen:GM12878:IMR90:Mesenchymal_Stem_Cell:Mesendoderm:Trophoblast-like_Cell:hESC	1e-167	rs35924562;rs4774291;rs117266250;rs35717353;rs55760919;rs72739122;rs34663616;rs935213;15:58561679_GAAAAAA_G;rs28690720;rs1560390;rs149299515;rs938509;rs554369334;rs12917140;rs413458;rs261268;rs261265;rs56195705;rs117459981;rs72739189;15:58624842_CAT_C;rs187773;rs1529577;rs147703470;rs185221561;rs12900738;rs16940126;rs74018729;rs8037865;rs445093;rs11071373;rs1560389;rs182006;rs77703135;rs59739041;…	29
ENSG00000166035	LIPC	15	58702768	58861151	1	protein_coding	3990	LIPC	0.000171127	0.201438	237	18.09	66	2.56012e-10	1.99668e-10	GTEx/v8/Adipose_Subcutaneous:GTEx/v8/Adipose_Visceral_Omentum:GTEx/v8/Artery_Tibial:GTEx/v8/Heart_Atrial_Appendage:GTEx/v8/Liver:GTEx/v8/Pancreas	-	Yes	EP_correlation_cell_type_oneway:Aorta:Left_Ventricle:Liver:Lung:Right_Ventricle:Spleen:GM12878:IMR90:Mesenchymal_Stem_Cell:Mesendoderm:Neural_Progenitor_Cell:Trophoblast-like_Cell:hESC	1e-167	rs12905732;rs60315394;rs490098;rs16940168;rs75672055;rs723967;rs13329672;rs12708454;rs12438999;rs11071380;rs34718390;rs62000866;rs75663614;rs11858279;rs35300429;rs402465;rs72740858;rs62000869;rs12916206;rs77703135;rs68041077;rs8026082;rs77027049;rs792902;rs515081;rs396198;rs375372;rs417344;rs6494005;rs261341;15:58719759_CT_C;rs17190510;15:58722073_CA_C;rs1077835;rs488490;rs35511894;rs11632618;rs1…	29
ENSG00000137845	ADAM10	15	58887403	59042177	-1	protein_coding	102	ADAM10	0.999845	-1.0323	0	0	0	NA	NA	NA	NA	Yes	Promoter_anchored_loops:Adult_Cortex:Aorta:Hippocampus:Left_Ventricle:Liver:Right_Ventricle:Spleen:GM12878:IMR90:Mesenchymal_Stem_Cell:Mesendoderm:Neural_Progenitor_Cell:Trophoblast-like_Cell:hESC	1e-167	rs35924562:rs4774291:rs117266250:rs35717353:rs55760919:rs72739122:rs34663616:rs935213:15:58561679_GAAAAAA_G:rs28690720;rs55760919:rs1560390:rs28690720:rs149299515:rs28690720;rs1560390:rs938509:rs1560390;rs554369334:rs554369334:rs12917140:rs413458:rs261268;rs261265:rs261265:rs261268:rs56195705:rs117459981:rs72739189:15:58624842_CAT_C:rs187773:rs1529577:rs147703470:rs185221561:rs12900738:rs16940126…	29
ENSG00000128923	FAM63B	15	59063391	59154099	1	protein_coding	54629	FAM63B	0.189061	-0.793709	0	0	0	NA	NA	NA	NA	Yes	Promoter_anchored_loops:Aorta:Hippocampus:Left_Ventricle:Liver:Right_Ventricle:Spleen:GM12878:IMR90:Mesenchymal_Stem_Cell:Mesendoderm:Neural_Progenitor_Cell:Trophoblast-like_Cell:hESC	1e-167	rs35924562:rs4774291:rs117266250:rs35717353:rs55760919:rs72739122:rs34663616:rs935213:15:58561679_GAAAAAA_G:rs28690720;rs55760919:rs1560390:rs28690720:rs149299515:rs28690720;rs1560390:rs938509:rs1560390;rs554369334:rs554369334:rs12917140:rs413458:rs261268;rs261265:rs261265:rs261268:rs56195705:rs117459981:rs72739189:15:58624842_CAT_C:rs187773:rs1529577:rs147703470:rs185221561:rs12900738:rs16940126…	29
ENSG00000157450	RNF111	15	59157374	59389618	1	protein_coding	54778	RNF111	0.999889	-0.971846	0	0	0	NA	NA	NA	NA	Yes	Adult_Cortex:Fetal_Cortex:Left_Ventricle:Liver:Right_Ventricle:GM12878:IMR90:Mesenchymal_Stem_Cell:Mesendoderm:Neural_Progenitor_Cell:Trophoblast-like_Cell:hESC	1e-167	rs35924562:rs4774291:rs12911658:rs17190510;rs417344:rs6494005:15:58722073_CA_C:rs1077835;rs488490:rs1077835:rs35511894:rs17190510:rs11632618:rs1077835;rs261341;15:58719759_CT_C:rs17269250:rs72740877:rs117266250:rs35717353:rs55760919:rs72739122:rs34663616:rs935213:15:58561679_GAAAAAA_G:rs28690720;rs55760919:rs1560390:rs28690720:rs149299515:rs28690720;rs1560390:rs938509:rs1560390;rs554369334:rs5543…	29
ENSG00000137776	SLTM	15	59171244	59225852	-1	protein_coding	79811	SLTM	0.999996	-0.544072	0	0	0	NA	NA	NA	NA	Yes	Left_Ventricle:Right_Ventricle:GM12878:IMR90:Mesenchymal_Stem_Cell:Mesendoderm:Trophoblast-like_Cell:hESC	1e-167	rs35924562:rs4774291:rs117266250:rs35717353:rs55760919:rs72739122:rs34663616:rs935213:15:58561679_GAAAAAA_G:rs28690720;rs55760919:rs1560390:rs28690720:rs149299515:rs28690720;rs1560390:rs938509:rs1560390;rs554369334:rs554369334:rs12917140:rs413458:rs261268;rs261265:rs261265:rs261268:rs56195705:rs117459981:rs72739189:15:58624842_CAT_C:rs187773:rs1529577:rs147703470:rs185221561:rs12900738:rs16940126…	29
ENSG00000157456	CCNB2	15	59397277	59417244	1	protein_coding	9133	CCNB2	1.58542e-06	-0.39477	0	0	0	NA	NA	NA	NA	Yes	Adult_Cortex:Fetal_Cortex:Aorta:Left_Ventricle:Right_Ventricle:GM12878:IMR90:Mesenchymal_Stem_Cell:Mesendoderm:Neural_Progenitor_Cell:Trophoblast-like_Cell:hESC	1e-167	rs35924562:rs4774291:rs17190510;rs417344:rs6494005:15:58722073_CA_C:rs1077835;rs488490:rs1077835:rs35511894:rs17190510:rs11632618:rs1077835;rs261341;15:58719759_CT_C:rs17269250:rs72740877:rs117266250:rs35717353:rs55760919:rs72739122:rs34663616:rs935213:15:58561679_GAAAAAA_G:rs28690720;rs55760919:rs1560390:rs28690720:rs149299515:rs28690720;rs1560390:rs938509:rs1560390;rs554369334:rs554369334:rs129…	29
ENSG00000268327	C15ORF31	15	59439899	59440054	1	protein_coding	NA	NA	NA	NA	0	0	0	NA	NA	NA	NA	Yes	Aorta:Left_Ventricle:Liver:GM12878:IMR90:Mesenchymal_Stem_Cell:Mesendoderm:Neural_Progenitor_Cell:Trophoblast-like_Cell:hESC	1e-167	rs4774291:rs117266250:rs35717353:rs55760919:rs72739122:rs34663616:rs935213:15:58561679_GAAAAAA_G:rs35924562:rs28690720;rs55760919:rs1560390:rs28690720:rs149299515:rs28690720;rs1560390:rs938509:rs1560390;rs554369334:rs554369334:rs12917140:rs413458:rs261268;rs261265:rs261265:rs261268:rs56195705:rs117459981:rs72739189:15:58624842_CAT_C:rs187773:rs1529577:rs147703470:rs185221561:rs12900738:rs16940126…	29
ENSG00000140297	GCNT3	15	59887074	59932438	1	protein_coding	9245	GCNT3	4.04467e-09	0.663107	0	0	0	NA	NA	NA	NA	Yes	Left_Ventricle:GM12878:IMR90:Mesenchymal_Stem_Cell:Mesendoderm:Trophoblast-like_Cell:hESC	1e-167	rs35924562:rs4774291:rs117266250:rs35717353:rs55760919:rs72739122:rs34663616:rs935213:15:58561679_GAAAAAA_G:rs28690720;rs55760919:rs1560390:rs28690720:rs149299515:rs28690720;rs1560390:rs938509:rs1560390;rs554369334:rs554369334:rs12917140:rs7162855:rs71116570:rs261291:rs261291;rs576650681:rs16940168:rs1601933:rs576650681:rs16940168;rs490098:rs12905732:rs34718390:rs12708454:rs16940168;rs12916206;rs…	29
ENSG00000140307	GTF2A2	15	59930261	59949740	-1	protein_coding	2958	GTF2A2	0.386342	0.8989	0	0	0	NA	NA	NA	NA	Yes	Left_Ventricle:GM12878:IMR90:Mesenchymal_Stem_Cell:Mesendoderm:Trophoblast-like_Cell:hESC	1e-167	rs1529577:rs74018729:rs147703470:rs8037865:rs445093:rs16940126;rs12900738:rs11071373:rs445093;rs1560389:rs1560389:rs16940126:rs182006:rs77703135;rs59739041:rs59739041:rs1838504;rs1444938:rs1444938:rs1838504:rs147468898:rs145347194:rs200743386:rs4775039:rs10152355:rs139071476:rs1601933:rs261291;rs1601935:rs1601935:rs8042174:rs261291:rs723967;rs1601933:rs117901517:rs35924562:rs4774291:rs117266250:r…	29
ENSG00000182718	ANXA2	15	60639333	60695082	-1	protein_coding	302	ANXA2	0.00984346	NA	0	0	0	NA	NA	NA	NA	Yes	IMR90:Mesenchymal_Stem_Cell	1e-167	rs4774291:rs117266250:rs35717353:rs55760919:rs72739122:rs34663616:rs935213:15:58561679_GAAAAAA_G:rs28690720;rs55760919:rs1560390:rs28690720:rs149299515:rs28690720;rs1560390:rs938509:rs1560390;rs554369334:rs554369334:rs12917140:rs413458:rs261268;rs261265:rs261265:rs261268:rs56195705:rs117459981:rs72739189:15:58624842_CAT_C:rs187773:rs1529577:rs147703470:rs185221561:rs12900738:rs16940126;rs12900738…	29
ENSG00000171989	LDHAL6B	15	59499042	59500705	1	protein_coding	92483	LDHAL6B	7.95326e-07	1.80709	0	0	0	NA	NA	NA	NA	Yes	Left_Ventricle:IMR90:Mesenchymal_Stem_Cell	2.1e-167	rs1529577:rs74018729:rs147703470:rs8037865:rs445093:rs16940126;rs12900738:rs11071373:rs445093;rs1560389:rs1560389:rs16940126:rs182006:rs77703135;rs59739041:rs59739041:rs1838504;rs1444938:rs1444938:rs1838504:rs147468898:rs145347194:rs200743386:rs4775039:rs10152355:rs139071476:rs1601933:rs261291;rs1601935:rs1601935:rs8042174:rs261291:rs723967;rs1601933:rs117901517:rs4774291:rs117266250:rs35717353:r…	29
ENSG00000137871	ZNF280D	15	56922379	57210769	-1	protein_coding	54816	ZNF280D	0.820128	-0.120447	0	0	0	NA	NA	NA	NA	Yes	IMR90	1.2e-37	rs55760919:rs28690720;rs55760919:rs117266250:15:58561679_GAAAAAA_G:rs34663616:rs1560390:rs35717353:rs28690720:rs149299515:rs28690720;rs1560390:rs938509:rs1560390;rs554369334:rs554369334:rs12917140	29
ENSG00000140262	TCF12	15	57210821	57591479	1	protein_coding	6938	TCF12	0.9739	-0.962373	0	0	0	NA	NA	NA	NA	Yes	IMR90	1.2e-37	rs55760919:rs28690720;rs55760919:rs117266250:15:58561679_GAAAAAA_G:rs34663616:rs1560390:rs35717353:rs28690720:rs149299515:rs28690720;rs1560390:rs938509:rs1560390;rs554369334:rs554369334:rs12917140	29
ENSG00000157483	MYO1E	15	59427113	59665099	-1	protein_coding	4643	MYO1E	0.0479779	0.925228	0	0	0	NA	NA	NA	NA	Yes	IMR90:Mesenchymal_Stem_Cell	1.2e-37	rs35924562:rs4774291:rs55760919:rs28690720;rs55760919:rs117266250:15:58561679_GAAAAAA_G:rs34663616:rs1560390:rs35717353:rs28690720:rs149299515:rs28690720;rs1560390:rs938509:rs1560390;rs554369334:rs554369334:rs12917140:rs72739122:rs935213	29
ENSG00000157470	FAM81A	15	59664892	59815748	1	protein_coding	145773	FAM81A	0.487072	-0.479273	0	0	0	NA	NA	NA	NA	Yes	IMR90:Mesenchymal_Stem_Cell	1.2e-37	rs35924562:rs4774291:rs55760919:rs28690720;rs55760919:rs117266250:15:58561679_GAAAAAA_G:rs34663616:rs1560390:rs35717353:rs28690720:rs149299515:rs28690720;rs1560390:rs938509:rs1560390;rs554369334:rs554369334:rs12917140:rs72739122:rs935213	29
ENSG00000103569	AQP9	15	58430368	58478110	1	protein_coding	366	AQP9	0.446615	1.79251	0	0	0	NA	NA	NA	NA	Yes	EP_correlation_cell_type_oneway:EP_correlation_organ_oneway:Mesendoderm:hESC	3.6e-13	rs935213:rs72739189:rs35924562:rs4774291	29
ENSG00000137878	GCOM1	15	57884106	58006943	1	protein_coding	145781	GCOM1	3.95491e-09	NA	0	0	0	NA	NA	NA	NA	Yes	Mesendoderm	1.2e-08	rs35924562:rs4774291	29
ENSG00000263155	MYZAP	15	57884139	57977562	1	protein_coding	100820829	MYZAP	2.21367e-09	-0.379994	0	0	0	NA	NA	NA	NA	Yes	Mesendoderm	1.2e-08	rs35924562:rs4774291	29
ENSG00000255529	POLR2M	15	57884231	58074960	1	protein_coding	81488	POLR2M	0.169086	-0.262164	0	0	0	NA	NA	NA	NA	Yes	Mesendoderm	1.2e-08	rs35924562:rs4774291	29
ENSG00000140299	BNIP2	15	59951345	59981733	-1	protein_coding	663	BNIP2	1.693e-05	3.06677	0	0	0	NA	NA	NA	NA	Yes	IMR90	1.2e-08	rs35924562:rs4774291	29
ENSG00000168806	LCMT2	15	43619974	43622803	-1	protein_coding	9836	LCMT2	7.26615e-08	-0.138074	0	0	20	1.49277e-09	2.53724e-11	GTEx/v8/Adipose_Subcutaneous:GTEx/v8/Artery_Aorta:GTEx/v8/Artery_Tibial	-	Yes	IMR90:Mesenchymal_Stem_Cell:hESC	1.7e-08	rs139974673	28
ENSG00000168803	ADAL	15	43622872	43646096	1	protein_coding	161823	ADAL	8.52496e-09	0.36708	0	0	20	3.11018e-12	1.77353e-83	GTEx/v8/Adipose_Subcutaneous:GTEx/v8/Adipose_Visceral_Omentum:GTEx/v8/Artery_Aorta:GTEx/v8/Artery_Coronary:GTEx/v8/Artery_Tibial:GTEx/v8/Heart_Atrial_Appendage:GTEx/v8/Heart_Left_Ventricle	-	Yes	IMR90:Mesenchymal_Stem_Cell:hESC	1.7e-08	rs139974673	28
ENSG00000067369	TP53BP1	15	43699407	43802926	-1	protein_coding	7158	TP53BP1	0.999856	-0.588436	2	6.298	21	1.38101e-08	1.19394e-18	GTEx/v8/Adipose_Subcutaneous:GTEx/v8/Artery_Aorta:GTEx/v8/Artery_Tibial	-	Yes	Promoter_anchored_loops:Adult_Cortex:GM12878:IMR90:Mesenchymal_Stem_Cell:Mesendoderm:hESC	1.7e-08	rs139974673	28
ENSG00000166963	MAP1A	15	43803156	43823818	1	protein_coding	4130	MAP1A	0.999689	-0.820834	1	19.98	0	NA	NA	NA	NA	Yes	Promoter_anchored_loops:Adult_Cortex:GM12878:IMR90:Mesenchymal_Stem_Cell:Mesendoderm:hESC	1.7e-08	rs139974673	28
ENSG00000242866	STRC	15	43891596	44010458	-1	protein_coding	161497	STRC	0.00532184	-0.331252	2	10.3	0	NA	NA	NA	NA	Yes	Promoter_anchored_loops	1.7e-08	rs139974673	28
ENSG00000223572	CKMT1A	15	43985084	43991420	1	protein_coding	548596	CKMT1A	0.0141218	-0.865449	0	0	11	0.00023636	0.0258389	GTEx/v8/Adipose_Visceral_Omentum	+	Yes	Promoter_anchored_loops	1.7e-08	rs139974673	28
ENSG00000128886	ELL3	15	44064798	44069741	-1	protein_coding	80237	ELL3	3.17481e-06	-0.742052	0	0	19	7.11547e-05	2.53513e-09	GTEx/v8/Pancreas	+	Yes	Adult_Cortex:Liver:GM12878:IMR90:Mesenchymal_Stem_Cell:Mesendoderm:Trophoblast-like_Cell:hESC	1.7e-08	rs139974673	28
ENSG00000159459	UBR1	15	43235095	43398311	-1	protein_coding	197131	UBR1	0.31989	-0.761526	0	0	0	NA	NA	NA	NA	Yes	Mesenchymal_Stem_Cell:hESC	2.3e-08	rs139974673	28
ENSG00000166947	EPB42	15	43398423	43513481	-1	protein_coding	2038	EPB42	1.5618e-07	-0.59571	0	0	0	NA	NA	NA	NA	Yes	Left_Ventricle:Liver:GM12878:IMR90:Mesenchymal_Stem_Cell:Mesendoderm:hESC	2.3e-08	rs139974673	28
ENSG00000104055	TGM5	15	43524793	43559055	-1	protein_coding	9333	TGM5	5.36529e-16	-0.136772	0	0	0	NA	NA	NA	NA	Yes	IMR90:Mesenchymal_Stem_Cell	2.3e-08	rs139974673	28
ENSG00000140265	ZSCAN29	15	43650370	43663223	-1	protein_coding	146050	ZSCAN29	2.29379e-06	-1.04456	0	0	0	NA	NA	NA	NA	Yes	IMR90:Mesenchymal_Stem_Cell:Mesendoderm:Trophoblast-like_Cell:hESC	2.3e-08	rs139974673	28
ENSG00000137822	TUBGCP4	15	43661419	43699293	1	protein_coding	27229	TUBGCP4	0.00528348	-0.84387	5	14.3	0	NA	NA	NA	NA	Yes	IMR90:Mesenchymal_Stem_Cell:Mesendoderm:Trophoblast-like_Cell:hESC	2.3e-08	rs139974673	28
ENSG00000168781	PPIP5K1	15	43825660	43882430	-1	protein_coding	9677	PPIP5K1	0.102605	-0.983223	1	19.98	4	0.000208914	0.0478915	GTEx/v8/Adipose_Visceral_Omentum	+	No	NA	2.3e-08	rs139974673	28
ENSG00000167004	PDIA3	15	44038590	44065477	1	protein_coding	2923	PDIA3	0.959251	-0.294235	0	0	4	0.000201614	0.00155857	GTEx/v8/Heart_Atrial_Appendage	+	No	NA	2.3e-08	rs139974673	28
ENSG00000140264	SERF2	15	44069285	44094787	1	protein_coding	10169	SERF2	0.138976	-0.560227	0	0	0	NA	NA	NA	NA	Yes	Adult_Cortex:Liver:GM12878:IMR90:Mesenchymal_Stem_Cell:Mesendoderm:Trophoblast-like_Cell:hESC	2.3e-08	rs139974673	28
ENSG00000268488	AC018512.1	15	44075041	44075231	-1	protein_coding	NA	NA	NA	NA	0	0	0	NA	NA	NA	NA	Yes	Adult_Cortex:Liver:GM12878:IMR90:Mesenchymal_Stem_Cell:Mesendoderm:Trophoblast-like_Cell:hESC	2.3e-08	rs139974673	28
ENSG00000140326	CDAN1	15	43015757	43029324	-1	protein_coding	146059	CDAN1	0.928144	-0.23397	0	0	0	NA	NA	NA	NA	Yes	Promoter_anchored_loops:Mesenchymal_Stem_Cell:hESC	2.4e-08	rs139974673	28
ENSG00000159495	TGM7	15	43568478	43594453	-1	protein_coding	116179	TGM7	6.34382e-10	-0.0767256	0	0	0	NA	NA	NA	NA	Yes	IMR90:Mesenchymal_Stem_Cell	2.4e-08	rs139974673	28
ENSG00000166762	CATSPER2	15	43920701	43960316	-1	protein_coding	117155	CATSPER2	3.04439e-05	NA	2	10.3	0	NA	NA	NA	NA	No	NA	1.6e-07	rs139974673	28
ENSG00000171877	FRMD5	15	44162962	44487450	-1	protein_coding	84978	FRMD5	0.991843	-1.54164	8	15.34	0	NA	NA	NA	NA	Yes	Promoter_anchored_loops:Left_Ventricle:Liver:GM12878:IMR90:Mesenchymal_Stem_Cell:Mesendoderm:Trophoblast-like_Cell:hESC	1.6e-07	rs139974673	28
ENSG00000137877	SPTBN5	15	42140345	42186275	-1	protein_coding	51332	SPTBN5	1.0901e-70	0.338139	0	0	0	NA	NA	NA	NA	Yes	Adult_Cortex	2e-07	rs139974673	28
ENSG00000242028	HYPK	15	44088340	44095241	1	protein_coding	25764	HYPK	0.0210308	-0.443036	0	0	0	NA	NA	NA	NA	Yes	Adult_Cortex	2e-07	rs139974673	28
ENSG00000166734	CASC4	15	44580927	44707956	1	protein_coding	113201	CASC4	0.00096773	-1.71664	2	16.39	0	NA	NA	NA	NA	Yes	GM12878:IMR90:Mesenchymal_Stem_Cell:Mesendoderm:Trophoblast-like_Cell:hESC	7.6e-07	rs139974673	28
ENSG00000104131	EIF3J	15	44829255	44855227	1	protein_coding	8669	EIF3J	0.859084	-0.525169	0	0	0	NA	NA	NA	NA	Yes	Promoter_anchored_loops:Adult_Cortex:GM12878:IMR90:Mesenchymal_Stem_Cell:Mesendoderm:Trophoblast-like_Cell:hESC	7.6e-07	rs139974673	28
ENSG00000137770	CTDSPL2	15	44719432	44821236	1	protein_coding	51496	CTDSPL2	0.995978	-2.7099	0	0	0	NA	NA	NA	NA	Yes	GM12878:IMR90:Mesenchymal_Stem_Cell	1e-06	rs139974673	28
ENSG00000140263	SORD	15	45315302	45369383	1	protein_coding	6652	SORD	0.00434795	-0.211294	0	0	0	NA	NA	NA	NA	Yes	Left_Ventricle	2.7e-06	rs139974673	28
ENSG00000104133	SPG11	15	44854894	44955876	-1	protein_coding	80208	SPG11	2.91203e-22	-0.610415	2	5.908	0	NA	NA	NA	NA	No	NA	5.2e-06	rs139974673	28
ENSG00000229474	PATL2	15	44957930	45003514	-1	protein_coding	197135	PATL2	0.0677101	0.105561	0	0	0	NA	NA	NA	NA	Yes	Aorta:Liver:GM12878:IMR90:Mesenchymal_Stem_Cell:Mesendoderm:Trophoblast-like_Cell:hESC	5.2e-06	rs139974673	28
ENSG00000166710	B2M	15	45003675	45011075	1	protein_coding	567	B2M	0.856562	0.154211	0	0	0	NA	NA	NA	NA	Yes	Aorta:Liver:GM12878:IMR90:Mesenchymal_Stem_Cell:Mesendoderm:Trophoblast-like_Cell:hESC	5.2e-06	rs139974673	28
ENSG00000185880	TRIM69	15	45021186	45060027	1	protein_coding	140691	TRIM69	1.96412e-10	0.0178681	0	0	0	NA	NA	NA	NA	Yes	Aorta:Liver:GM12878:IMR90:Mesenchymal_Stem_Cell:Mesendoderm:Trophoblast-like_Cell:hESC	5.2e-06	rs139974673	28
ENSG00000103512	NOMO1	16	14927538	14990017	1	protein_coding	23420	NOMO1	NA	-0.558034	13	12.9	80	3.09949e-10	2.74226e-15	GTEx/v8/Adipose_Subcutaneous:GTEx/v8/Adipose_Visceral_Omentum:GTEx/v8/Artery_Tibial:GTEx/v8/Heart_Atrial_Appendage:GTEx/v8/Heart_Left_Ventricle:GTEx/v8/Pancreas	-	Yes	Promoter_anchored_loops:Mesenchymal_Stem_Cell	1.2e-70	rs370260133;rs572006137;rs141502961;rs538834547;rs71374758;rs11644601;rs3198697;rs62039478;rs374889059;rs2307502;rs153799;rs2519438;rs35512524;rs72789541;rs755903303;rs34955778;rs11075260;rs8054081;16:15640870_CT_C;rs559115405;rs56826720;rs3867518;rs11075261;rs56006013;rs222140;rs35694612;rs2384934;rs377615530;rs222140:rs774936434:rs538834547:rs34376746:rs35694612;rs377615530:rs117876551:rs620391…	30
ENSG00000183426	NPIPA1	16	15016659	15045915	1	protein_coding	9284	NPIPA1	0.495054	-0.152308	5	2.895	356	2.27979e-39	4.30601e-32	GTEx/v8/Adipose_Subcutaneous:GTEx/v8/Adipose_Visceral_Omentum:GTEx/v8/Artery_Aorta:GTEx/v8/Artery_Coronary:GTEx/v8/Artery_Tibial:GTEx/v8/Heart_Atrial_Appendage:GTEx/v8/Heart_Left_Ventricle:GTEx/v8/Liver:GTEx/v8/Pancreas	-	No	NA	1.2e-70	rs3198697;rs4985127;rs35429473;rs528780951;rs34483003;rs559115405;rs56826720;rs71373034;16:14648291_AT_A;rs34936342;rs2519438;rs62039478;rs370260133;rs141502961;rs572006137;rs538834547;rs374889059;rs35512524;rs72789541;rs755903303;rs11644601;rs8048552;rs11075260;rs11861982;rs11075261;rs3867518;rs56006013;rs199782954;rs62037794;rs61084260;rs140014347;rs2307502;rs153799;rs774936434;rs8053048;rs2221…	30
ENSG00000179889	PDXDC1	16	15068448	15233196	1	protein_coding	23042	PDXDC1	2.3026e-07	-0.437005	108	22.7	176	3.10265e-25	1.00609e-19	GTEx/v8/Adipose_Subcutaneous:GTEx/v8/Adipose_Visceral_Omentum:GTEx/v8/Artery_Aorta:GTEx/v8/Artery_Coronary:GTEx/v8/Artery_Tibial:GTEx/v8/Heart_Atrial_Appendage:GTEx/v8/Heart_Left_Ventricle:GTEx/v8/Pancreas	-	Yes	Promoter_anchored_loops:Left_Ventricle:Liver:GM12878:IMR90:Mesenchymal_Stem_Cell:Mesendoderm:Trophoblast-like_Cell:hESC	1.2e-70	rs200575134;rs529360800;rs72789541;rs62039478;rs35512524;rs4985127;rs148664265;rs71374758;rs9928601;rs28412131;rs374889059;rs9888789;rs755903303;rs3198697;rs34955778;rs11644601;rs188533455;rs35429473;rs8048552;rs538834547;rs148348041;rs34483003;rs71373034;rs34936342;rs11075260;rs11861982;rs8054081;16:15414730_CTTTTTTTTTT_C;rs139110024;rs75512281;rs140014347;rs153799;rs62039124;rs572006137;rs34376…	30
ENSG00000157045	NTAN1	16	15131710	15149921	-1	protein_coding	123803	NTAN1	0.0158737	NA	52	22.7	67	2.21296e-14	7.68744e-10	GTEx/v8/Adipose_Subcutaneous:GTEx/v8/Adipose_Visceral_Omentum:GTEx/v8/Artery_Aorta:GTEx/v8/Artery_Tibial:GTEx/v8/Heart_Atrial_Appendage:GTEx/v8/Heart_Left_Ventricle:GTEx/v8/Liver	-	Yes	Promoter_anchored_loops:Adult_Cortex:Left_Ventricle:Liver:GM12878:IMR90:Mesenchymal_Stem_Cell:Mesendoderm:Trophoblast-like_Cell:hESC	1.2e-70	rs72789541;rs755903303;rs35512524;rs62039478;rs3198697;rs34955778;rs11644601;rs188533455;rs199782954;rs35429473;rs11075260;rs11075261;rs3867518;rs56006013;rs2519438;rs2384934;rs111618101;rs8048552;rs528780951;rs148664265;rs117876551;rs572006137;rs141502961;rs538834547;rs222140;rs35694612;rs377615530;rs62039478:rs374889059:rs148664265:rs538834547:rs35512524:rs72789541;rs755903303:rs72789541:rs3495…	30
ENSG00000085721	RRN3	16	15153879	15188174	-1	protein_coding	54700	RRN3	0.00047458	-0.668988	24	6.506	83	9.54152e-09	8.06072e-24	GTEx/v8/Adipose_Subcutaneous:GTEx/v8/Artery_Aorta:GTEx/v8/Artery_Tibial:GTEx/v8/Heart_Atrial_Appendage:GTEx/v8/Heart_Left_Ventricle:GTEx/v8/Liver	-	Yes	Promoter_anchored_loops	1.2e-70	rs72789541;rs755903303;rs11644601;rs62039478;rs188533455;rs35429473;rs8048552;rs35512524;rs148664265;rs538834547;rs4781684;rs3198697;rs11075260;rs117876551;rs62036306;rs111618101;rs3867518;rs11075261;rs56006013;rs2519438;rs199782954;rs2384934;rs8053048;rs111618101:rs34936342:rs56826720:rs62039478:rs374889059:rs529360800:rs188533455:rs35512524:rs538834547	30
ENSG00000183793	NPIPA5	16	15457516	15474904	-1	protein_coding	100288332	NPIPA5	0.544995	-0.0832964	6	2.546	397	2.49656e-61	1.0127e-51	GTEx/v8/Adipose_Subcutaneous:GTEx/v8/Adipose_Visceral_Omentum:GTEx/v8/Artery_Aorta:GTEx/v8/Artery_Coronary:GTEx/v8/Artery_Tibial:GTEx/v8/Heart_Atrial_Appendage:GTEx/v8/Heart_Left_Ventricle:GTEx/v8/Liver:GTEx/v8/Pancreas	+	Yes	Promoter_anchored_loops	1.2e-70	rs61084260;rs141502961;rs572006137;rs75512281;rs140014347;rs9941229;rs34483003;rs559115405;rs56826720;rs71373034;16:14648291_AT_A;rs34936342;rs111618101;rs146651998;rs62039478;rs370260133;rs538834547;rs3198697;rs374889059;rs35429473;rs35512524;rs148664265;rs72789541;rs755903303;rs11644601;rs8048552;rs188533455;rs11075260;rs11861982;rs3867518;rs11075261;rs56006013;rs2519438;rs199782954;rs62037794;…	30
ENSG00000261130	RP11-1021N1.1	16	15489611	15609205	1	protein_coding	NA	NA	NA	NA	114	12.74	0	NA	NA	NA	NA	Yes	Promoter_anchored_loops:Aorta:Left_Ventricle:Liver:GM12878:IMR90:Mesenchymal_Stem_Cell:Mesendoderm:hESC	1.2e-70	rs61084260;rs188533455;rs2307502;rs141502961;rs153799;rs8053048;rs774936434;rs222140;rs538834547;rs1684546;rs766485929;rs36058330;16:15598635_TA_T;rs555987464;rs62039124;rs58837030;rs148991560;rs62039478:rs374889059:rs4781684:rs62039124;rs880071:rs1684546;rs58837030:rs1684546;16:15598635_TA_T:rs58837030:16:15598635_TA_T:rs1684546:rs148991560:rs62039124:rs117975403:rs222140:16:15640870_CT_C:16:156…	30
ENSG00000156968	MPV17L	16	15489611	15507125	1	protein_coding	255027	MPV17L	0.000500982	-0.394011	11	4.787	126	2.22013e-28	3.01833e-39	GTEx/v8/Adipose_Subcutaneous:GTEx/v8/Adipose_Visceral_Omentum:GTEx/v8/Heart_Atrial_Appendage:GTEx/v8/Heart_Left_Ventricle	-	Yes	Promoter_anchored_loops:Aorta:Left_Ventricle:Liver:GM12878:IMR90:Mesenchymal_Stem_Cell:Mesendoderm:hESC	1.2e-70	rs61084260;rs188533455;rs2307502;rs141502961;rs153799;rs8053048;16:14591093_CT_C;rs528780951;rs148664265;rs139110024;rs774936434;rs222140;rs1684546;rs766485929;rs62039124;16:15598635_TA_T;rs34376746;rs117876551;rs880071;rs35429473;rs8048552;rs62039478:rs374889059:rs4781684:rs62039124;rs880071:rs1684546;rs58837030:rs1684546;16:15598635_TA_T:rs58837030:16:15598635_TA_T:rs1684546:rs148991560:rs62039…	30
ENSG00000166783	KIAA0430	16	15688243	15737023	-1	protein_coding	9665	KIAA0430	1	-1.50946	42	19.19	0	NA	NA	NA	NA	Yes	Liver:GM12878:IMR90:Mesenchymal_Stem_Cell:Mesendoderm:Trophoblast-like_Cell:hESC	1.2e-70	rs34376746;rs35694612;rs377615530;rs117876551;rs62039124;rs880071;16:15640870_CT_C:rs62039124:rs34072053:rs34376746:rs117876551:rs35694612;rs377615530:rs377615530:rs35694612:rs72789541;rs755903303:rs35512524:rs62039478:rs72789541:rs3198697:rs34955778:rs755903303:rs11644601:rs188533455:rs61084260:rs2307502:rs141502961:rs153799;rs2307502:rs8053048:rs1684546:rs766485929:rs36058330:rs222140:rs1684546…	30
ENSG00000072864	NDE1	16	15737124	15820210	1	protein_coding	54820	NDE1	0.0471095	0.252884	45	22.5	38	7.57097e-25	2.09062e-21	GTEx/v8/Adipose_Subcutaneous:GTEx/v8/Adipose_Visceral_Omentum:GTEx/v8/Artery_Aorta:GTEx/v8/Artery_Tibial:GTEx/v8/Heart_Atrial_Appendage:GTEx/v8/Heart_Left_Ventricle:GTEx/v8/Pancreas	+	Yes	Liver:GM12878:IMR90:Mesenchymal_Stem_Cell:Mesendoderm:Trophoblast-like_Cell:hESC	1.2e-70	rs34376746;rs35694612;rs377615530;rs117876551;rs62039124;rs880071;rs4781684;rs62039478;rs71374758;rs11644601;rs11075260;rs2384934;rs55900631;rs35512524;rs11861982;16:15640870_CT_C:rs62039124:rs34072053:rs34376746:rs117876551:rs35694612;rs377615530:rs377615530:rs35694612:rs72789541;rs755903303:rs35512524:rs62039478:rs72789541:rs3198697:rs34955778:rs755903303:rs11644601:rs188533455:rs61084260:rs230…	30
ENSG00000133392	MYH11	16	15797029	15950890	-1	protein_coding	4629	MYH11	0.998956	-0.00180375	59	22.5	0	NA	NA	NA	NA	Yes	Aorta:Left_Ventricle:Liver:GM12878:IMR90:Mesenchymal_Stem_Cell:Mesendoderm:Trophoblast-like_Cell:hESC	1.2e-70	rs62039124;rs34376746;rs880071;rs35694612;rs4781684;rs377615530;rs2384934;rs117876551;rs880071:rs117876551:rs377615530:rs4781684:rs3198697:rs4985127:rs35429473:rs528780951:rs200575134:rs529360800:rs72789541:rs62039478:rs72789541;rs755903303:rs35512524:rs34955778:rs755903303:rs11644601:rs188533455:16:15640870_CT_C:rs62039124:rs34072053:rs34376746:rs35694612;rs377615530:rs35694612:rs62039124;rs8800…	30
ENSG00000133393	FOPNL	16	15959577	15982482	-1	protein_coding	123811	FOPNL	9.46709e-06	1.98661	0	0	0	NA	NA	NA	NA	Yes	Promoter_anchored_loops:IMR90:Mesenchymal_Stem_Cell:Mesendoderm:hESC	1.2e-70	rs35512524:rs538834547:rs528066129:rs72789541;rs755903303:rs62039478:rs72789541:rs3198697:rs34955778:rs755903303:rs11644601:rs188533455:rs880071:rs117876551:rs377615530:rs4781684:rs4985127:rs35429473:rs528780951:rs200575134:rs529360800:rs61084260:rs2307502:rs141502961:rs153799;rs2307502:rs8053048:rs35694612:rs62039124;rs880071:rs2384934;rs35694612:rs2384934	30
ENSG00000254852	NPIPA2	16	14841923	14859270	1	protein_coding	642799	NPIPA2	NA	-0.137549	5	2.922	57	4.75708e-10	2.41318e-09	GTEx/v8/Adipose_Subcutaneous:GTEx/v8/Adipose_Visceral_Omentum:GTEx/v8/Artery_Aorta:GTEx/v8/Artery_Tibial:GTEx/v8/Heart_Atrial_Appendage:GTEx/v8/Heart_Left_Ventricle:GTEx/v8/Liver:GTEx/v8/Pancreas	+	No	NA	6.6e-59	rs4003231;rs146651998;rs200324553;rs55900631;rs370260133;rs3198697;rs374889059;rs11644601;rs11075260;rs62039124;rs35694612;rs34376746;rs880071;rs4781684;rs2384934;rs35429473;rs8048552;rs141502961;rs572006137;rs222140	30
ENSG00000069764	PLA2G10	16	14766405	14788526	-1	protein_coding	8399	PLA2G10	0.0217477	-0.612987	6	3.887	1	5.06613e-05	0.00873002	GTEx/v8/Pancreas	+	Yes	Promoter_anchored_loops	7.6e-58	rs111618101;rs34936342;rs56826720;rs188533455;16:14591093_CT_C;rs55900631;rs35512524;rs111618101:rs34936342:rs56826720:rs11644601	30
ENSG00000166780	C16orf45	16	15528152	15718885	1	protein_coding	89927	C16orf45	0.21468	-0.633435	171	19.19	90	1.57234e-10	1.56637e-06	GTEx/v8/Adipose_Subcutaneous:GTEx/v8/Artery_Aorta:GTEx/v8/Artery_Tibial:GTEx/v8/Heart_Atrial_Appendage:GTEx/v8/Pancreas	+	Yes	Promoter_anchored_loops:IMR90:Mesenchymal_Stem_Cell	1.9e-50	rs774936434;rs8053048;rs222140;rs141502961;rs153799;rs538834547;rs1684546;rs766485929;rs36058330;16:15598635_TA_T;rs555987464;rs62039124;rs58837030;rs148991560;rs117975403;16:15640870_CT_C;16:15635759_TA_T;rs34072053;rs34376746;rs117876551;rs35694612;rs377615530;rs2307502;rs34376746:rs35694612:rs35694612;rs377615530:rs377615530:rs3198697:rs4985127:rs35429473:rs528780951:rs200575134:rs529360800:rs…	30
ENSG00000091262	ABCC6	16	16242785	16317379	-1	protein_coding	368	ABCC6	1.45457e-06	1.25585	0	0	0	NA	NA	NA	NA	Yes	Promoter_anchored_loops:IMR90:Mesenchymal_Stem_Cell:Mesendoderm	1.9e-50	rs774936434;rs8053048:rs8053048:rs222140:rs774936434:rs141502961:16:15598635_TA_T:rs117975403:16:15640870_CT_C:16:15635759_TA_T:rs148991560:rs62039124:rs35694612:rs4781684:rs62039124;rs880071:rs62039124;rs34376746;rs880071:rs35694612;rs377615530:rs880071:rs117876551:rs377615530:rs3198697:rs4985127:rs35429473:rs528780951:rs200575134:rs529360800:rs72789541:rs62039478:rs34376746	30
ENSG00000103226	NOMO3	16	16326352	16388668	1	protein_coding	408050	NOMO3	NA	-0.391241	0	0	0	NA	NA	NA	NA	Yes	Promoter_anchored_loops	5.7e-27	rs188533455:rs61084260:rs2307502:rs141502961	30
ENSG00000140694	PARN	16	14529558	14726585	-1	protein_coding	5073	PARN	0.387184	-0.95662	125	14.45	6	1.31831e-06	8.00184e-05	GTEx/v8/Artery_Tibial	+	Yes	Promoter_anchored_loops	2.7e-25	rs62036306;rs559115405;rs56826720;rs147627332;16:14648291_AT_A;rs148348041;rs34483003;16:14591093_CT_C;rs71373034;16:14647113_TAA_T;rs34936342;rs111618101;rs55900631;rs538834547:rs71374758:rs11075261:rs11075261;rs56006013:rs11861982:rs56006013	30
ENSG00000103429	BFAR	16	14726672	14763093	1	protein_coding	51283	BFAR	0.00230975	-0.464763	12	19.04	27	5.05297e-08	6.4824e-05	GTEx/v8/Adipose_Subcutaneous:GTEx/v8/Artery_Tibial	-	Yes	Promoter_anchored_loops	2.7e-25	rs559115405;16:14648291_AT_A;rs56826720;rs34936342;rs62036306;rs111618101;rs11075260;rs538834547:rs71374758:rs11075261:rs11075261;rs56006013:rs11861982:rs56006013	30
ENSG00000153066	TXNDC11	16	11772936	11836734	-1	protein_coding	51061	TXNDC11	0.00317801	NA	0	0	0	NA	NA	NA	NA	Yes	IMR90:Mesenchymal_Stem_Cell	4.7e-24	rs559115405;16:14648291_AT_A;rs56826720:rs559115405;rs147627332;rs56826720:rs559115405:rs71373034:rs148348041:rs34483003:16:14647113_TAA_T:16:14648291_AT_A:rs34936342	30
ENSG00000171490	RSL1D1	16	11929056	11945442	-1	protein_coding	26156	RSL1D1	0.000364294	-0.233304	0	0	0	NA	NA	NA	NA	Yes	IMR90:Mesenchymal_Stem_Cell:hESC	4.7e-24	rs559115405;16:14648291_AT_A;rs56826720:rs34483003:rs559115405;rs56826720:16:14647113_TAA_T:16:14648291_AT_A:rs71373034:rs559115405:rs34936342	30
ENSG00000237515	SHISA9	16	12995477	13334272	1	protein_coding	729993	SHISA9	NA	NA	0	0	0	NA	NA	NA	NA	Yes	Mesendoderm:Trophoblast-like_Cell:hESC	4.7e-24	rs62036306:rs559115405;rs56826720:rs559115405;rs147627332;16:14648291_AT_A;rs56826720:rs559115405:rs148348041:rs559115405;16:14648291_AT_A:rs559115405;rs56826720:rs71373034:rs34483003:16:14647113_TAA_T:16:14648291_AT_A:rs34936342	30
ENSG00000175595	ERCC4	16	14014014	14046202	1	protein_coding	2072	ERCC4	3.33158e-10	1.19402	0	0	0	NA	NA	NA	NA	Yes	Adult_Cortex:Aorta:Left_Ventricle:Liver:Pancreas:Right_Ventricle:Spleen:GM12878:IMR90:Mesenchymal_Stem_Cell:Mesendoderm:Neural_Progenitor_Cell:Trophoblast-like_Cell:hESC	4.7e-24	rs559115405;16:14648291_AT_A;rs56826720:rs559115405;rs56826720:rs71373034:rs148348041:rs62036306:rs559115405;rs147627332;rs56826720:rs559115405:rs559115405;16:14648291_AT_A:rs34483003:16:14647113_TAA_T:16:14648291_AT_A:rs34936342:rs147627332:rs10048117:rs9941229:rs111618101:rs559115405;16:14648291_AT_A:16:14591093_CT_C:rs56826720:rs62036306;rs111618101	30
ENSG00000186260	MKL2	16	14165178	14360630	1	protein_coding	57496	MKL2	0.999938	0.37478	0	0	0	NA	NA	NA	NA	Yes	Aorta:Left_Ventricle:Liver:GM12878:IMR90:Mesenchymal_Stem_Cell:Mesendoderm:Trophoblast-like_Cell:hESC	4.7e-24	rs559115405;16:14648291_AT_A;rs56826720:rs559115405;rs147627332;rs56826720:rs559115405:rs71373034:rs148348041:rs34483003:16:14647113_TAA_T:16:14648291_AT_A:rs34936342:rs62036306:rs559115405;16:14648291_AT_A:rs559115405;16:14648291_AT_A:16:14591093_CT_C:rs147627332:rs10048117:rs9941229:rs111618101	30
ENSG00000269049	AC092291.2	16	14564842	14565054	1	protein_coding	NA	NA	NA	NA	7	10.02	0	NA	NA	NA	NA	Yes	Left_Ventricle:Liver:IMR90:Mesenchymal_Stem_Cell:Mesendoderm:Trophoblast-like_Cell:hESC	4.7e-24	rs559115405;16:14648291_AT_A;rs56826720;rs147627332;rs62036306:rs559115405;rs56826720:rs559115405;rs56826720:rs559115405:rs148348041:rs559115405;16:14648291_AT_A:rs559115405;rs56826720:rs71373034:rs34483003:16:14647113_TAA_T:16:14648291_AT_A:rs34936342:rs147627332:rs10048117:rs9941229:rs111618101	30
ENSG00000184602	SNN	16	11762270	11773015	1	protein_coding	8303	SNN	0.0202491	0.972466	0	0	0	NA	NA	NA	NA	Yes	IMR90:Mesenchymal_Stem_Cell	4.8e-23	rs62036306:rs559115405;rs56826720:rs559115405;rs147627332;16:14648291_AT_A;rs56826720:rs559115405:rs148348041:rs559115405;16:14648291_AT_A:rs559115405;rs56826720:rs71373034	30
ENSG00000103489	XYLT1	16	17195626	17564738	-1	protein_coding	64131	XYLT1	0.98516	2.93979	0	0	0	NA	NA	NA	NA	Yes	IMR90	4.8e-23	rs559115405;16:14648291_AT_A;rs56826720:rs559115405;rs147627332;rs56826720:rs559115405:rs71373034:rs148348041	30
ENSG00000087253	LPCAT2	16	55542910	55620582	1	protein_coding	54947	LPCAT2	1.12519e-06	1.04294	0	0	0	NA	NA	NA	NA	Yes	Trophoblast-like_Cell	3.6e-20	rs9989419:rs3764261:rs12448528:rs12923459:rs12708967:rs12720918:rs3816117:rs1864163:rs1864163;rs9939224	31
ENSG00000159461	AMFR	16	56395364	56459450	-1	protein_coding	267	AMFR	0.00142576	-0.148589	0	0	0	NA	NA	NA	NA	Yes	IMR90:Mesendoderm:hESC	3.6e-20	rs9989419:rs3764261:rs12448528:rs12923459:rs12708967:rs12720918:rs3816117:rs1864163:rs1864163;rs9939224	31
ENSG00000167005	NUDT21	16	56463045	56486111	-1	protein_coding	11051	NUDT21	0.947296	-0.951046	0	0	0	NA	NA	NA	NA	Yes	Left_Ventricle:IMR90:Mesenchymal_Stem_Cell:Mesendoderm:Trophoblast-like_Cell:hESC	3.6e-20	rs9989419:rs3764261:rs12448528:rs12923459:rs12708967:rs12720918:rs3816117:rs1864163:rs1864163;rs9939224	31
ENSG00000087263	OGFOD1	16	56485402	56513012	1	protein_coding	55239	OGFOD1	1.29449e-08	1.03888	0	0	0	NA	NA	NA	NA	Yes	Left_Ventricle:IMR90:Mesenchymal_Stem_Cell:Mesendoderm:Trophoblast-like_Cell:hESC	3.6e-20	rs9989419:rs3764261:rs12448528:rs12923459:rs12708967:rs12720918:rs3816117:rs1864163:rs1864163;rs9939224	31
ENSG00000102891	MT4	16	56598961	56602869	1	protein_coding	84560	MT4	0.00799458	0.168442	0	0	0	NA	NA	NA	NA	Yes	IMR90:Mesenchymal_Stem_Cell:Mesendoderm:hESC	3.6e-20	rs9989419:rs3764261:rs12448528:rs12923459:rs12708967:rs12720918:rs3816117:rs1864163:rs1864163;rs9939224	31
ENSG00000087250	MT3	16	56622986	56625000	1	protein_coding	4504	MT3	0.254133	NA	0	0	0	NA	NA	NA	NA	Yes	IMR90:Mesenchymal_Stem_Cell:Mesendoderm	3.6e-20	rs9989419:rs3764261:rs12448528:rs12923459:rs12708967:rs12720918:rs3816117:rs1864163:rs1864163;rs9939224	31
ENSG00000125148	MT2A	16	56642111	56643409	1	protein_coding	4502	MT2A	0.0538692	-0.424008	0	0	0	NA	NA	NA	NA	Yes	Adult_Cortex:Left_Ventricle:Liver:GM12878:IMR90:Mesenchymal_Stem_Cell:Mesendoderm:Trophoblast-like_Cell:hESC	3.6e-20	rs9989419:rs3764261:rs12448528:rs12923459:rs12708967:rs12720918:rs3816117:rs1864163:rs1864163;rs9939224	31
ENSG00000169715	MT1E	16	56659387	56661024	1	protein_coding	4493	MT1E	0.659213	-0.0899531	0	0	0	NA	NA	NA	NA	Yes	Left_Ventricle:Liver:GM12878:IMR90:Mesenchymal_Stem_Cell:Mesendoderm:Trophoblast-like_Cell:hESC	3.6e-20	rs9989419:rs3764261:rs12448528:rs12923459:rs12708967:rs12720918:rs3816117:rs1864163:rs1864163;rs9939224	31
ENSG00000268317	AC026461.1	16	56662971	56666150	-1	protein_coding	NA	NA	NA	NA	0	0	0	NA	NA	NA	NA	Yes	Left_Ventricle:Liver:GM12878:IMR90:Mesenchymal_Stem_Cell:Mesendoderm:Trophoblast-like_Cell:hESC	3.6e-20	rs9989419:rs3764261:rs12448528:rs12923459:rs12708967:rs12720918:rs3816117:rs1864163:rs1864163;rs9939224	31
ENSG00000205364	MT1M	16	56666145	56667898	1	protein_coding	4499	MT1M	9.83544e-05	-0.29423	0	0	0	NA	NA	NA	NA	Yes	Left_Ventricle:Liver:GM12878:IMR90:Mesenchymal_Stem_Cell:Mesendoderm:Trophoblast-like_Cell:hESC	3.6e-20	rs9989419:rs3764261:rs12448528:rs12923459:rs12708967:rs12720918:rs3816117:rs1864163:rs1864163;rs9939224	31
ENSG00000205362	MT1A	16	56672578	56673999	1	protein_coding	4489	MT1A	0.00777619	0.386134	0	0	0	NA	NA	NA	NA	Yes	Left_Ventricle:Liver:GM12878:IMR90:Mesenchymal_Stem_Cell:Mesendoderm:Trophoblast-like_Cell:hESC	3.6e-20	rs9989419:rs3764261:rs12448528:rs12923459:rs12708967:rs12720918:rs3816117:rs1864163:rs1864163;rs9939224	31
ENSG00000169688	MT1B	16	56685811	56687116	1	protein_coding	4490	MT1B	0.248269	0.352967	0	0	0	NA	NA	NA	NA	Yes	Left_Ventricle:Liver:GM12878:IMR90:Mesenchymal_Stem_Cell:Mesendoderm:Trophoblast-like_Cell:hESC	3.6e-20	rs9989419:rs3764261:rs12448528:rs12923459:rs12708967:rs12720918:rs3816117:rs1864163:rs1864163;rs9939224:rs118146573:rs9939224:rs11076176	31
ENSG00000198417	MT1F	16	56691606	56694610	1	protein_coding	4494	MT1F	0.0538497	-0.34497	0	0	0	NA	NA	NA	NA	Yes	Left_Ventricle:Liver:GM12878:IMR90:Mesenchymal_Stem_Cell:Mesendoderm:Trophoblast-like_Cell:hESC	3.6e-20	rs9989419:rs3764261:rs12448528:rs12923459:rs12708967:rs12720918:rs3816117:rs1864163:rs1864163;rs9939224:rs118146573:rs9939224:rs11076176	31
ENSG00000125144	MT1G	16	56700643	56701977	-1	protein_coding	4495	MT1G	0.00811948	0.102812	0	0	0	NA	NA	NA	NA	Yes	Left_Ventricle:Liver:GM12878:IMR90:Mesenchymal_Stem_Cell:Mesendoderm:Trophoblast-like_Cell:hESC	3.6e-20	rs9989419:rs3764261:rs12448528:rs12923459:rs12708967:rs12720918:rs3816117:rs1864163:rs1864163;rs9939224:rs118146573:rs9939224:rs11076176	31
ENSG00000205358	MT1H	16	56703726	56705041	1	protein_coding	4496	MT1H	0.0548412	-0.294411	0	0	0	NA	NA	NA	NA	Yes	Left_Ventricle:Liver:GM12878:IMR90:Mesenchymal_Stem_Cell:Mesendoderm:Trophoblast-like_Cell:hESC	3.6e-20	rs9989419:rs3764261:rs12448528:rs12923459:rs12708967:rs12720918:rs3816117:rs1864163:rs1864163;rs9939224:rs118146573:rs9939224:rs11076176	31
ENSG00000187193	MT1X	16	56716336	56718108	1	protein_coding	4501	MT1X	0.0496112	0.296377	0	0	0	NA	NA	NA	NA	Yes	Left_Ventricle:Liver:GM12878:IMR90:Mesenchymal_Stem_Cell:Mesendoderm:Trophoblast-like_Cell:hESC	3.6e-20	rs9989419:rs3764261:rs12448528:rs12923459:rs12708967:rs12720918:rs3816117:rs1864163:rs1864163;rs9939224:rs118146573:rs9939224:rs11076176	31
ENSG00000102900	NUP93	16	56764017	56878797	1	protein_coding	9688	NUP93	0.00486804	NA	0	0	0	NA	NA	NA	NA	Yes	Left_Ventricle:Liver:GM12878:IMR90:Mesenchymal_Stem_Cell:Mesendoderm:Trophoblast-like_Cell:hESC	3.6e-20	rs9989419:rs3764261:rs12448528:rs12923459:rs12708967:rs12720918:rs3816117:rs1864163:rs1864163;rs9939224:rs118146573:rs9939224:rs11076176	31
ENSG00000070915	SLC12A3	16	56899119	56949762	1	protein_coding	6559	SLC12A3	5.54411e-18	1.05829	0	0	0	NA	NA	NA	NA	Yes	Aorta:Left_Ventricle:Liver:Spleen:GM12878:IMR90:Mesenchymal_Stem_Cell:Mesendoderm:Trophoblast-like_Cell:hESC	3.6e-20	rs9989419:rs3764261:rs12448528:rs12923459:rs12708967:rs12720918:rs3816117:rs1864163:rs1864163;rs9939224:rs118146573:rs9939224:rs11076176	31
ENSG00000051108	HERPUD1	16	56965960	56977798	1	protein_coding	9709	HERPUD1	0.821043	-0.272869	8	6.618	8	7.44854e-07	9.20685e-07	GTEx/v8/Adipose_Subcutaneous	-	Yes	Adult_Cortex:GM12878:IMR90:Mesenchymal_Stem_Cell	3.6e-20	rs9989419;rs3764261;rs12448528;rs12923459;rs9989419:rs3764261:rs12448528:rs12923459:rs1864163;rs9939224:rs118146573:rs3816117:rs9939224:rs11076176	31
ENSG00000087237	CETP	16	56995762	57017757	1	protein_coding	1071	CETP	5.18057e-12	0.0439088	50	14.68	28	2.31346e-08	7.55584e-05	GTEx/v8/Adipose_Subcutaneous:GTEx/v8/Artery_Aorta:GTEx/v8/Heart_Atrial_Appendage:GTEx/v8/Pancreas	-	Yes	GM12878:IMR90:Mesenchymal_Stem_Cell	3.6e-20	rs12923459;rs3764261;rs12708967;rs12720918;rs3816117;rs1864163;rs9939224;rs118146573;rs11076176;rs9939224:rs118146573:rs3816117:rs3764261:rs9939224:rs11076176	31
ENSG00000140853	NLRC5	16	57023397	57117443	1	protein_coding	84166	NLRC5	6.71794e-05	0.253522	0	0	0	NA	NA	NA	NA	Yes	GM12878:IMR90:Mesenchymal_Stem_Cell	3.6e-20	rs9989419:rs3764261:rs12448528:rs12923459:rs12708967:rs12720918:rs3816117:rs1864163:rs1864163;rs9939224	31
ENSG00000172775	FAM192A	16	57186378	57220028	-1	protein_coding	80011	FAM192A	0.944099	-0.529182	0	0	0	NA	NA	NA	NA	Yes	Adult_Cortex:Aorta:Hippocampus:Left_Ventricle:Liver:Right_Ventricle:Spleen:GM12878:IMR90:Mesenchymal_Stem_Cell:Mesendoderm:Trophoblast-like_Cell:hESC	3.6e-20	rs9989419:rs3764261:rs12448528:rs12923459:rs1864163;rs9939224:rs118146573:rs3816117:rs9939224:rs11076176:rs12708967:rs12720918:rs1864163	31
ENSG00000159579	RSPRY1	16	57220049	57274387	1	protein_coding	89970	RSPRY1	0.999778	-0.337763	0	0	0	NA	NA	NA	NA	Yes	Adult_Cortex:Aorta:Hippocampus:Left_Ventricle:Liver:Right_Ventricle:Spleen:GM12878:IMR90:Mesenchymal_Stem_Cell:Mesendoderm:Trophoblast-like_Cell:hESC	3.6e-20	rs9989419:rs3764261:rs12448528:rs12923459:rs1864163;rs9939224:rs118146573:rs3816117:rs9939224:rs11076176:rs12708967:rs12720918:rs1864163	31
ENSG00000102931	ARL2BP	16	57279010	57287516	1	protein_coding	23568	ARL2BP	0.000774156	-0.164113	0	0	0	NA	NA	NA	NA	Yes	Liver:GM12878:IMR90:Mesenchymal_Stem_Cell	3.6e-20	rs9989419:rs3764261:rs12448528:rs12923459:rs12708967:rs12720918:rs3816117:rs1864163:rs1864163;rs9939224	31
ENSG00000102962	CCL22	16	57392684	57400102	1	protein_coding	6367	CCL22	0.279053	1.69473	0	0	0	NA	NA	NA	NA	Yes	GM12878	3.6e-20	rs9989419:rs3764261:rs12448528:rs12923459:rs12708967:rs12720918:rs3816117:rs1864163:rs1864163;rs9939224	31
ENSG00000140848	CPNE2	16	57126449	57181878	1	protein_coding	221184	CPNE2	0.544003	NA	0	0	0	NA	NA	NA	NA	Yes	Adult_Cortex	1.3e-19	rs9989419:rs3764261:rs12448528:rs12923459:rs1864163;rs9939224:rs118146573:rs3816117:rs9939224:rs11076176	31
ENSG00000134419	RPS15A	16	18792617	18801705	-1	protein_coding	6210	RPS15A	0.833356	-0.376607	0	0	0	NA	NA	NA	NA	Yes	Mesenchymal_Stem_Cell	7.3e-11	rs880071:rs117876551:rs377615530:rs4781684	30
ENSG00000260342	RP11-1035H13.3	16	18799385	18812841	-1	protein_coding	NA	NA	NA	NA	0	0	0	NA	NA	NA	NA	Yes	Mesenchymal_Stem_Cell	7.3e-11	rs880071:rs117876551:rs377615530:rs4781684	30
ENSG00000170540	ARL6IP1	16	18802991	18813000	-1	protein_coding	23204	ARL6IP1	0.00667569	-0.374658	0	0	0	NA	NA	NA	NA	Yes	Mesenchymal_Stem_Cell	7.3e-11	rs880071:rs117876551:rs377615530:rs4781684	30
ENSG00000224712	NPIPA3	16	14802801	14820195	1	protein_coding	642778	NPIPA3	NA	-0.137549	1	1.867	0	NA	NA	NA	NA	No	NA	1.9e-10	rs188533455;16:14591093_CT_C	30
ENSG00000159720	ATP6V0D1	16	67471917	67515140	-1	protein_coding	9114	ATP6V0D1	0.988132	-0.0425072	2	6.79	0	NA	NA	NA	NA	Yes	Adult_Cortex:Left_Ventricle	4.4e-10	rs4986970	32
ENSG00000159723	AGRP	16	67516474	67517716	-1	protein_coding	181	AGRP	0.0903873	-0.228652	1	6.79	0	NA	NA	NA	NA	Yes	Adult_Cortex:Left_Ventricle	4.4e-10	rs4986970	32
ENSG00000141098	GFOD2	16	67708434	67753324	-1	protein_coding	81577	GFOD2	0.0605374	-0.955753	0	0	0	NA	NA	NA	NA	Yes	Fetal_Cortex:Left_Ventricle:GM12878:IMR90:Mesenchymal_Stem_Cell:Trophoblast-like_Cell:hESC	4.4e-10	rs4986970	32
ENSG00000141084	RANBP10	16	67757005	67840555	-1	protein_coding	57610	RANBP10	0.951824	-2.1592	0	0	0	NA	NA	NA	NA	Yes	Adult_Cortex:Fetal_Cortex:IMR90	4.4e-10	rs4986970	32
ENSG00000102904	TSNAXIP1	16	67840668	67866051	1	protein_coding	55815	TSNAXIP1	9.27238e-18	-0.329502	0	0	0	NA	NA	NA	NA	Yes	Adult_Cortex:Fetal_Cortex:IMR90	4.4e-10	rs4986970	32
ENSG00000102901	CENPT	16	67862060	67881714	-1	protein_coding	80152	CENPT	0.0553624	-0.678946	0	0	0	NA	NA	NA	NA	Yes	Adult_Cortex:Fetal_Cortex:Left_Ventricle:Liver:Spleen:GM12878:IMR90:Mesenchymal_Stem_Cell:Mesendoderm:Trophoblast-like_Cell:hESC	4.4e-10	rs4986970	32
ENSG00000102898	NUTF2	16	67880635	67906470	1	protein_coding	10204	NUTF2	0.88515	-0.697364	0	0	0	NA	NA	NA	NA	Yes	Adult_Cortex:Fetal_Cortex:Left_Ventricle:Liver:Spleen:GM12878:IMR90:Mesenchymal_Stem_Cell:Mesendoderm:Trophoblast-like_Cell:hESC	4.4e-10	rs4986970	32
ENSG00000038358	EDC4	16	67906926	67918406	1	protein_coding	23644	EDC4	0.995196	-0.559325	0	0	0	NA	NA	NA	NA	Yes	Adult_Cortex:Left_Ventricle:Liver:Spleen:GM12878:IMR90:Mesenchymal_Stem_Cell:Mesendoderm:Trophoblast-like_Cell:hESC	4.4e-10	rs4986970	32
ENSG00000188038	NRN1L	16	67918708	67922758	1	protein_coding	123904	NRN1L	0.000386711	-0.414516	0	0	0	NA	NA	NA	NA	Yes	Adult_Cortex:Fetal_Cortex:Left_Ventricle:Liver:Spleen:GM12878:IMR90:Mesenchymal_Stem_Cell:Mesendoderm:Trophoblast-like_Cell:hESC	4.4e-10	rs4986970	32
ENSG00000159792	PSKH1	16	67927175	67963581	1	protein_coding	5681	PSKH1	0.0178742	-1.24293	0	0	0	NA	NA	NA	NA	Yes	Adult_Cortex:Fetal_Cortex:Left_Ventricle:Liver:GM12878:IMR90:Mesenchymal_Stem_Cell:Mesendoderm:Trophoblast-like_Cell:hESC	4.4e-10	rs4986970	32
ENSG00000261884	CTC-479C5.12	16	67963517	67969920	-1	protein_coding	NA	NA	NA	NA	1	23.4	0	NA	NA	NA	NA	Yes	Promoter_anchored_loops:Adult_Cortex:Fetal_Cortex	4.4e-10	rs4986970	32
ENSG00000205220	PSMB10	16	67968405	67970990	-1	protein_coding	5699	PSMB10	2.33998e-05	-0.21892	1	23.4	0	NA	NA	NA	NA	Yes	Promoter_anchored_loops	4.4e-10	rs4986970	32
ENSG00000213398	LCAT	16	67973653	67978034	-1	protein_coding	3931	LCAT	0.496436	-0.294093	1	23.4	0	NA	NA	NA	NA	Yes	Promoter_anchored_loops	4.4e-10	rs4986970	32
ENSG00000124067	SLC12A4	16	67977377	68003504	-1	protein_coding	6560	SLC12A4	1.82559e-07	-0.363904	1	23.4	0	NA	NA	NA	NA	Yes	Left_Ventricle:GM12878:IMR90:Mesenchymal_Stem_Cell	4.4e-10	rs4986970	32
ENSG00000167261	DPEP2	16	68021297	68034489	-1	protein_coding	64174	DPEP2	4.01062e-05	-0.461549	1	5.687	0	NA	NA	NA	NA	Yes	Adult_Cortex:Fetal_Cortex:Left_Ventricle:GM12878:IMR90:Mesenchymal_Stem_Cell	4.4e-10	rs4986970	32
ENSG00000167264	DUS2	16	68021649	68113223	1	protein_coding	54920	DUS2	0.000272032	NA	1	5.687	0	NA	NA	NA	NA	Yes	Promoter_anchored_loops:Left_Ventricle:GM12878:IMR90:Mesenchymal_Stem_Cell	4.4e-10	rs4986970	32
ENSG00000182810	DDX28	16	68055179	68057770	-1	protein_coding	55794	DDX28	0.0348937	-0.695273	0	0	0	NA	NA	NA	NA	Yes	Adult_Cortex:Fetal_Cortex:Left_Ventricle:Liver:Spleen:GM12878:IMR90:Mesenchymal_Stem_Cell:Mesendoderm:Trophoblast-like_Cell:hESC	4.4e-10	rs4986970	32
ENSG00000072736	NFATC3	16	68118654	68263162	1	protein_coding	4775	NFATC3	0.998062	0.527374	1	0.65	0	NA	NA	NA	NA	Yes	Adult_Cortex:Fetal_Cortex:Left_Ventricle:Liver:GM12878:IMR90:Mesenchymal_Stem_Cell:Mesendoderm:Trophoblast-like_Cell:hESC	4.4e-10	rs4986970	32
ENSG00000141096	DPEP3	16	68009566	68014732	-1	protein_coding	64180	DPEP3	9.13572e-07	-0.50899	1	5.687	0	NA	NA	NA	NA	Yes	Left_Ventricle:GM12878:IMR90:Mesenchymal_Stem_Cell	5.8e-08	rs4986970	32
ENSG00000103067	ESRP2	16	68263014	68272005	-1	protein_coding	80004	ESRP2	0.731425	-1.02275	0	0	0	NA	NA	NA	NA	Yes	Promoter_anchored_loops:Left_Ventricle:Liver:GM12878:IMR90:Mesenchymal_Stem_Cell:Mesendoderm:hESC	5.8e-08	rs4986970	32
ENSG00000103066	PLA2G15	16	68279207	68294961	1	protein_coding	23659	PLA2G15	0.65843	-0.279351	0	0	0	NA	NA	NA	NA	Yes	Promoter_anchored_loops:Left_Ventricle:Liver:GM12878:IMR90:Mesenchymal_Stem_Cell:Mesendoderm:hESC	5.8e-08	rs4986970	32
ENSG00000103061	SLC7A6OS	16	68318406	68344849	-1	protein_coding	84138	SLC7A6OS	0.807327	-1.88576	0	0	0	NA	NA	NA	NA	Yes	GM12878:IMR90:Mesenchymal_Stem_Cell:Trophoblast-like_Cell	5.8e-08	rs4986970	32
ENSG00000132600	PRMT7	16	68344877	68392466	1	protein_coding	54496	PRMT7	8.30564e-09	-0.873099	0	0	0	NA	NA	NA	NA	Yes	GM12878:IMR90:Mesenchymal_Stem_Cell:Trophoblast-like_Cell	5.8e-08	rs4986970	32
ENSG00000103044	HAS3	16	69139467	69152622	1	protein_coding	3038	HAS3	0.269387	-0.838006	0	0	0	NA	NA	NA	NA	Yes	IMR90	5.8e-08	rs4986970	32
ENSG00000263203	CHTF8	16	69152757	69154331	-1	protein_coding	54921	CHTF8	NA	-0.491897	0	0	0	NA	NA	NA	NA	Yes	IMR90	5.8e-08	rs4986970	32
ENSG00000135723	FHOD1	16	67263290	67281561	-1	protein_coding	29109	FHOD1	9.46043e-11	0.241355	0	0	0	NA	NA	NA	NA	Yes	IMR90:Mesenchymal_Stem_Cell	2.2e-07	rs4986970	32
ENSG00000196155	PLEKHG4	16	67311413	67323402	1	protein_coding	25894	PLEKHG4	1.46441e-09	-1.21685	0	0	0	NA	NA	NA	NA	Yes	IMR90:Mesenchymal_Stem_Cell	2.2e-07	rs4986970	32
ENSG00000168676	KCTD19	16	67323331	67360666	-1	protein_coding	146212	KCTD19	3.33892e-08	NA	0	0	0	NA	NA	NA	NA	Yes	IMR90:Mesenchymal_Stem_Cell:Mesendoderm	2.2e-07	rs4986970	32
ENSG00000159708	LRRC36	16	67360701	67419106	1	protein_coding	55282	LRRC36	3.63106e-10	NA	0	0	0	NA	NA	NA	NA	Yes	IMR90:Mesenchymal_Stem_Cell:Mesendoderm	2.2e-07	rs4986970	32
ENSG00000159713	TPPP3	16	67423712	67427438	-1	protein_coding	51673	TPPP3	0.311517	0.0216755	0	0	0	NA	NA	NA	NA	Yes	Left_Ventricle:IMR90:Mesenchymal_Stem_Cell:Mesendoderm:hESC	2.2e-07	rs4986970	32
ENSG00000159714	ZDHHC1	16	67428322	67450736	-1	protein_coding	29800	ZDHHC1	5.10929e-06	NA	0	0	0	NA	NA	NA	NA	Yes	IMR90:Mesenchymal_Stem_Cell	2.2e-07	rs4986970	32
ENSG00000176387	HSD11B2	16	67464555	67471456	1	protein_coding	3291	HSD11B2	0.244955	NA	0	0	0	NA	NA	NA	NA	Yes	IMR90:Mesenchymal_Stem_Cell	2.2e-07	rs4986970	32
ENSG00000102977	ACD	16	67691415	67694713	-1	protein_coding	65057	ACD	5.7798e-07	NA	0	0	0	NA	NA	NA	NA	Yes	Promoter_anchored_loops:Left_Ventricle:GM12878:IMR90:Mesenchymal_Stem_Cell	2.2e-07	rs4986970	32
ENSG00000102981	PARD6A	16	67694849	67696681	1	protein_coding	50855	PARD6A	0.854735	NA	0	0	0	NA	NA	NA	NA	Yes	Promoter_anchored_loops:Left_Ventricle:GM12878:IMR90:Mesenchymal_Stem_Cell	2.2e-07	rs4986970	32
ENSG00000124074	ENKD1	16	67696848	67701168	-1	protein_coding	84080	ENKD1	2.15383e-05	NA	0	0	0	NA	NA	NA	NA	Yes	Left_Ventricle:GM12878:IMR90:Mesenchymal_Stem_Cell	2.2e-07	rs4986970	32
ENSG00000159761	C16orf86	16	67700719	67702661	1	protein_coding	388284	C16orf86	0.652429	NA	0	0	1	0.000160554	0.0161727	GTEx/v8/Pancreas	-	Yes	Left_Ventricle:GM12878:IMR90:Mesenchymal_Stem_Cell	2.2e-07	rs4986970	32
ENSG00000039523	FAM65A	16	67552321	67580691	1	protein_coding	79567	FAM65A	0.895578	-0.435667	1	7.012	0	NA	NA	NA	NA	Yes	GM12878	2.1e-06	rs4986970	32
ENSG00000159753	RLTPR	16	67678822	67691472	1	protein_coding	146206	RLTPR	0.0223533	NA	0	0	0	NA	NA	NA	NA	Yes	GM12878:IMR90:Mesenchymal_Stem_Cell:Mesendoderm:Trophoblast-like_Cell:hESC	2.1e-06	rs4986970	32
ENSG00000168286	THAP11	16	67876213	67878097	1	protein_coding	57215	THAP11	0.465633	NA	0	0	0	NA	NA	NA	NA	Yes	IMR90	2.1e-06	rs4986970	32
ENSG00000141086	CTRL	16	67961543	67966317	-1	protein_coding	1506	CTRL	7.86918e-06	-0.42882	0	0	0	NA	NA	NA	NA	Yes	Adult_Cortex:Fetal_Cortex	2.1e-06	rs4986970	32
ENSG00000102974	CTCF	16	67596310	67673086	1	protein_coding	10664	CTCF	0.997925	-0.536093	0	0	0	NA	NA	NA	NA	Yes	Left_Ventricle:Mesenchymal_Stem_Cell	2.4e-06	rs4986970	32
ENSG00000225190	PLEKHM1	17	43513266	43568115	-1	protein_coding	9842	PLEKHM1	0.840543	-0.663068	140	18.95	2815	2.76383e-14	3.72801e-10	GTEx/v8/Adipose_Subcutaneous:GTEx/v8/Adipose_Visceral_Omentum:GTEx/v8/Artery_Aorta:GTEx/v8/Artery_Tibial:GTEx/v8/Heart_Left_Ventricle	-	Yes	Promoter_anchored_loops	1.5e-16	rs16940904;rs546735951;17:43511281_TGGCTAACACGGTGAAACCCC_T;rs142925250;rs2732699;17:44286218_CA_C;rs112557952;rs9913081;rs549080390;rs71279459;rs55938136;rs35076622;rs2074404;rs7225002;17:44858598_CA_C;rs6503451;rs142925250:rs16940904;17:44286218_CA_C:rs16940904;rs112557952:rs16940904;17:44286218_CA_C:rs9303521:rs565716222:rs55938136:rs16940904:rs16940904;rs2074404:rs16940904;rs2732699:rs16940904	34
ENSG00000120088	CRHR1	17	43699267	43913194	1	protein_coding	1394	CRHR1	0.792134	2.03809	941	19.39	2909	1.86977e-23	2.70499e-18	GTEx/v8/Adipose_Subcutaneous:GTEx/v8/Adipose_Visceral_Omentum	-	Yes	Promoter_anchored_loops:IMR90:Mesenchymal_Stem_Cell:Mesendoderm:hESC	1.5e-16	rs16940904;rs2732699;17:44286218_CA_C;rs112557952;rs9913081;rs549080390;rs71279459;rs9303521;rs565716222;rs55938136;rs546735951;17:43511281_TGGCTAACACGGTGAAACCCC_T;rs35076622;rs35111772;rs2074404;rs142925250;rs7221167;rs6503451;rs2435200;rs7225002;17:44858598_CA_C;rs56755526;rs142925250:rs16940904;rs2074404:rs16940904;rs112557952:rs16940904;17:44286218_CA_C:rs16940904;rs112557952:rs16940904:rs169…	34
ENSG00000185294	SPPL2C	17	43922256	43924438	1	protein_coding	162540	SPPL2C	2.29525e-05	0.187395	121	23.5	0	NA	NA	NA	NA	Yes	Promoter_anchored_loops:EP_correlation_organ_oneway:Aorta:Left_Ventricle:Liver:IMR90:Mesenchymal_Stem_Cell:Mesendoderm:Neural_Progenitor_Cell:Trophoblast-like_Cell:hESC	1.5e-16	rs16940904;rs2732699;rs9913081;17:44286218_CA_C;rs112557952;rs2074404;17:43511281_TGGCTAACACGGTGAAACCCC_T;rs7221167;rs546735951;rs142925250:rs16940904;rs112557952:rs16940904;17:44286218_CA_C:rs16940904:rs16940904;17:44286218_CA_C:rs16940904;rs2074404:rs16940904;rs2732699:rs16940904;rs9913081:rs7225002:rs16940904;rs56755526;rs56755526:rs16940904;17:44858598_CA_C;rs549080390;rs549080390:rs16940904;…	34
ENSG00000186868	MAPT	17	43971748	44105700	1	protein_coding	4137	MAPT	4.68265e-05	2.01024	798	26.8	2912	1.31245e-17	4.84413e-68	GTEx/v8/Adipose_Subcutaneous:GTEx/v8/Adipose_Visceral_Omentum:GTEx/v8/Artery_Aorta:GTEx/v8/Artery_Tibial:GTEx/v8/Heart_Left_Ventricle	+	Yes	Promoter_anchored_loops:EP_correlation_cell_type_oneway:Adult_Cortex:Fetal_Cortex:IMR90:Mesenchymal_Stem_Cell:Mesendoderm:hESC	1.5e-16	rs16940904;rs2732699;rs9913081;17:44286218_CA_C;rs112557952;rs2074404;rs6503451;rs549080390;rs2435200;rs7225002;rs546735951;17:43511281_TGGCTAACACGGTGAAACCCC_T;rs142925250;rs55938136;rs7221167;17:44858598_CA_C;rs35076622;rs56755526;rs71279459;rs9303521;rs2074404:rs16940904;17:44286218_CA_C:rs16940904;rs112557952:rs16940904:rs16940904;rs112557952:rs16940904;rs2732699:rs16940904;rs9913081:rs1694090…	34
ENSG00000256762	STH	17	44076616	44077060	1	protein_coding	246744	STH	0.00444467	0.274193	98	19.15	0	NA	NA	NA	NA	Yes	Promoter_anchored_loops:Adult_Cortex:Aorta:Left_Ventricle:Liver:GM12878:IMR90:Mesenchymal_Stem_Cell:Mesendoderm:Trophoblast-like_Cell:hESC	1.5e-16	rs16940904;rs2732699;rs9913081;17:44286218_CA_C;rs2074404;rs2435200;rs2074404:rs16940904;17:44286218_CA_C:rs16940904;rs549080390;rs112557952:rs16940904;rs112557952:rs16940904:rs16940904;rs2074404:rs7225002:rs16940904;17:44858598_CA_C;rs112557952;rs2074404:rs6503451:rs16940904;rs2732699:rs16940904;rs9913081:rs16940904;rs112557952:17:44286218_CA_C:rs16940904;17:43511281_TGGCTAACACGGTGAAACCCC_T:rs72…	34
ENSG00000120071	KANSL1	17	44107282	44302733	-1	protein_coding	284058	KANSL1	0.999734	0.0589452	1075	26.4	2885	6.14241e-12	6.72547e-40	GTEx/v8/Adipose_Subcutaneous:GTEx/v8/Adipose_Visceral_Omentum:GTEx/v8/Artery_Aorta:GTEx/v8/Artery_Coronary:GTEx/v8/Artery_Tibial:GTEx/v8/Heart_Atrial_Appendage:GTEx/v8/Heart_Left_Ventricle:GTEx/v8/Liver:GTEx/v8/Pancreas	-	Yes	Promoter_anchored_loops:GM12878:Mesenchymal_Stem_Cell	1.5e-16	rs16940904;rs2732699;rs9913081;17:44286218_CA_C;rs2074404;rs112557952;rs7225002;rs549080390;17:44858598_CA_C;rs369541018;rs546735951;17:43511281_TGGCTAACACGGTGAAACCCC_T;rs142925250;rs55938136;rs35076622;rs56755526;17:44286218_CA_C:rs16940904;rs112557952:rs16940904:rs16940904;rs9913081:rs16940904;rs2732699:rs16940904;rs112557952:rs16940904;rs2074404:rs2435200:rs16940904;rs2074404:rs16940904;rs1125…	34
ENSG00000176681	LRRC37A	17	44370099	44415160	1	protein_coding	9884	LRRC37A	0.890487	NA	68	15.22	2914	1.94262e-79	1.19942e-67	GTEx/v8/Adipose_Subcutaneous:GTEx/v8/Adipose_Visceral_Omentum:GTEx/v8/Artery_Aorta:GTEx/v8/Artery_Coronary:GTEx/v8/Artery_Tibial:GTEx/v8/Heart_Atrial_Appendage:GTEx/v8/Heart_Left_Ventricle:GTEx/v8/Liver:GTEx/v8/Pancreas	-	Yes	EP_links_oneway:Promoter_anchored_loops:GM12878:Mesenchymal_Stem_Cell:Mesendoderm	1.5e-16	rs16940904;rs2732699;rs549080390;rs112557952;17:44858598_CA_C;17:44286218_CA_C;rs71363586;rs9913081;rs7225002;rs546735951;17:43511281_TGGCTAACACGGTGAAACCCC_T;rs142925250;rs71279459;rs55938136;rs35076622;rs2074404;rs7221167;rs6503451;rs2435200;rs56755526;rs2074404:rs16940904;rs9913081:rs16940904;rs112557952:rs16940904:rs16940904;rs112557952:rs16940904;17:44286218_CA_C:rs16940904;rs2732699:rs722500…	34
ENSG00000238083	LRRC37A2	17	44588877	44633016	1	protein_coding	474170	LRRC37A2	NA	NA	11	19.03	2771	8.05734e-120	1.51829e-103	GTEx/v8/Adipose_Subcutaneous:GTEx/v8/Adipose_Visceral_Omentum:GTEx/v8/Artery_Aorta:GTEx/v8/Artery_Coronary:GTEx/v8/Artery_Tibial:GTEx/v8/Heart_Atrial_Appendage:GTEx/v8/Heart_Left_Ventricle:GTEx/v8/Liver:GTEx/v8/Pancreas	-	Yes	Mesenchymal_Stem_Cell	1.5e-16	rs16940904;rs2732699;rs7225002;rs112557952;17:44858598_CA_C;rs549080390;17:44286218_CA_C;rs9913081;rs71279459;rs9303521;rs55938136;rs546735951;17:43511281_TGGCTAACACGGTGAAACCCC_T;rs35076622;rs2074404;rs7221167;rs6503451;rs2435200;rs56755526;rs2074404:rs16940904;rs112557952:rs16940904;17:44286218_CA_C:rs16940904:rs16940904;17:44286218_CA_C:rs16940904;rs9913081:rs16940904;rs2074404:rs7225002:rs1694…	34
ENSG00000185829	ARL17A	17	44594068	44657088	-1	protein_coding	51326	ARL17A	NA	-2.38258	10	19.03	2765	3.41734e-19	6.22486e-21	GTEx/v8/Adipose_Subcutaneous:GTEx/v8/Adipose_Visceral_Omentum:GTEx/v8/Artery_Aorta:GTEx/v8/Artery_Coronary:GTEx/v8/Artery_Tibial:GTEx/v8/Heart_Atrial_Appendage:GTEx/v8/Heart_Left_Ventricle:GTEx/v8/Liver:GTEx/v8/Pancreas	-	No	NA	1.5e-16	rs7225002;rs16940904;rs2732699;rs112557952;17:44858598_CA_C;rs549080390;17:44286218_CA_C;rs9913081;rs71279459;rs9303521;rs55938136;rs546735951;17:43511281_TGGCTAACACGGTGAAACCCC_T;rs35076622;rs2074404;rs6503451;rs56755526;rs7221167;rs2435200	34
ENSG00000073969	NSF	17	44668035	44834830	1	protein_coding	4905	NSF	0.713682	-0.566247	62	17.18	2731	4.17256e-08	5.07065e-12	GTEx/v8/Artery_Aorta:GTEx/v8/Artery_Tibial:GTEx/v8/Heart_Atrial_Appendage:GTEx/v8/Heart_Left_Ventricle	+	No	NA	1.5e-16	rs16940904;17:44858598_CA_C;rs2732699;rs549080390;rs112557952;rs56755526;rs199470;rs2074404;rs9913081;17:44286218_CA_C;rs9303521;rs55938136;rs546735951;17:43511281_TGGCTAACACGGTGAAACCCC_T;rs35076622;rs6503451;rs2435200	34
ENSG00000108379	WNT3	17	44839872	44910520	-1	protein_coding	7473	WNT3	0.946108	-0.191111	42	16.08	1926	4.83642e-27	1.5414e-26	GTEx/v8/Adipose_Subcutaneous:GTEx/v8/Adipose_Visceral_Omentum:GTEx/v8/Artery_Aorta:GTEx/v8/Artery_Coronary:GTEx/v8/Artery_Tibial:GTEx/v8/Heart_Atrial_Appendage:GTEx/v8/Heart_Left_Ventricle:GTEx/v8/Pancreas	-	Yes	Promoter_anchored_loops:Adult_Cortex:Mesenchymal_Stem_Cell:hESC	1.5e-16	rs16940904;rs56755526;17:44858598_CA_C;rs2732699;rs549080390;rs112557952;rs2074404;rs9913081;17:44286218_CA_C;17:43511281_TGGCTAACACGGTGAAACCCC_T;rs6503451;rs2435200;rs7225002;rs7221167;rs16940904:rs16940904;17:44286218_CA_C:rs16940904;rs2074404:rs16940904;rs112557952:rs16940904;rs2732699:rs16940904;rs112557952:rs7225002:rs16940904;rs2074404:rs199470:rs16940904;rs56755526:rs16940904	34
ENSG00000179673	RPRML	17	45055523	45056614	-1	protein_coding	388394	RPRML	0.421295	NA	0	0	0	NA	NA	NA	NA	Yes	Left_Ventricle:Liver:Right_Ventricle:GM12878:IMR90:Mesenchymal_Stem_Cell:Mesendoderm:Trophoblast-like_Cell:hESC	1.5e-16	rs16940904;rs56755526;rs2074404:rs16940904;rs56755526:rs16940904;17:44858598_CA_C;rs2732699;rs549080390;rs112557952:rs16940904;rs549080390:rs16940904;rs9913081;17:44286218_CA_C;rs112557952:rs16940904:rs16940904;rs112557952;17:44286218_CA_C:rs7225002:rs16940904;rs9913081:rs16940904;17:44286218_CA_C:rs16940904;rs2732699:rs16940904;rs2732699:rs2732699:rs16940904;rs112557952:rs2696531:rs16940904;rs11…	34
ENSG00000172992	DCAKD	17	43100708	43138473	-1	protein_coding	79877	DCAKD	0.0293861	0.848595	0	0	2032	1.83107e-06	2.68979e-32	GTEx/v8/Adipose_Subcutaneous:GTEx/v8/Artery_Tibial	-	No	NA	3.2e-16	rs16940904;rs546735951;17:43511281_TGGCTAACACGGTGAAACCCC_T;rs142925250;rs2732699;17:44286218_CA_C;rs112557952;rs9913081;rs549080390;rs55938136;rs2074404;rs71279459;rs35076622	34
ENSG00000004897	CDC27	17	45195069	45266788	-1	protein_coding	996	CDC27	0.486673	-0.787143	0	0	0	NA	NA	NA	NA	Yes	Left_Ventricle:Mesenchymal_Stem_Cell:Mesendoderm:hESC	3.2e-16	rs16940904;rs2732699;rs9913081;17:44286218_CA_C;rs2074404:rs16940904;rs2074404:rs16940904:rs16940904;rs112557952:rs16940904;rs549080390;17:44286218_CA_C:rs16940904;rs112557952;17:44858598_CA_C;rs9913081:rs16940904;rs2074404:rs7225002:rs16940904;rs56755526;rs56755526:rs16940904	34
ENSG00000198336	MYL4	17	45277812	45301045	1	protein_coding	4635	MYL4	0.000175625	-0.33374	0	0	0	NA	NA	NA	NA	Yes	Fetal_Cortex:Left_Ventricle:Mesenchymal_Stem_Cell:Mesendoderm:hESC	3.2e-16	rs16940904;rs2732699;rs549080390;17:44286218_CA_C;rs112557952:rs16940904;rs2732699:rs16940904;rs9913081;rs2074404:rs16940904:rs16940904;rs112557952;rs2074404:rs16940904;17:44858598_CA_C;17:44286218_CA_C:rs16940904;rs9913081:rs16940904;rs2074404:rs7225002:rs16940904;rs56755526;rs56755526:rs16940904	34
ENSG00000108424	KPNB1	17	45726842	45762871	1	protein_coding	3837	KPNB1	0.999994	-0.517927	0	0	0	NA	NA	NA	NA	Yes	IMR90:Mesenchymal_Stem_Cell:hESC	3.2e-16	rs16940904;rs2732699;rs9913081;17:44286218_CA_C;rs2074404:rs16940904;rs2074404:rs16940904:rs16940904;rs112557952:rs16940904;rs549080390;17:44286218_CA_C:rs16940904;rs112557952;rs56755526;rs56755526:rs16940904;17:44858598_CA_C;rs549080390:rs16940904;rs9913081:rs16940904;rs2074404:rs7225002:rs16940904	34
ENSG00000108433	GOSR2	17	45000483	45105003	1	protein_coding	9570	GOSR2	0.000289194	0.147391	0	0	0	NA	NA	NA	NA	Yes	IMR90:Mesenchymal_Stem_Cell:Mesendoderm:hESC	3.5e-16	rs16940904;rs2732699;rs9913081;17:44286218_CA_C;rs112557952:rs16940904;17:44286218_CA_C:rs16940904;rs112557952:rs16940904:rs16940904;rs549080390;rs2074404:rs16940904;rs2732699:rs16940904;rs112557952;rs2074404:rs7225002:rs16940904;rs9913081:rs16940904;17:44858598_CA_C;rs56755526;rs56755526:rs16940904;rs549080390:rs16940904;17:43511281_TGGCTAACACGGTGAAACCCC_T:rs7221167:rs16940904;rs2074404:rs991308…	34
ENSG00000262633	RP11-156P1.2	17	45000499	45124520	1	protein_coding	NA	NA	NA	NA	0	0	0	NA	NA	NA	NA	Yes	IMR90:Mesenchymal_Stem_Cell:Mesendoderm:hESC	3.5e-16	rs16940904;rs2732699;rs9913081;17:44286218_CA_C;rs112557952:rs16940904;17:44286218_CA_C:rs16940904;rs112557952:rs16940904:rs16940904;rs549080390;rs2074404:rs16940904;rs2732699:rs16940904;rs112557952;rs2074404:rs7225002:rs16940904;rs9913081:rs16940904;17:44858598_CA_C;rs56755526;rs56755526:rs16940904;rs549080390:rs16940904;17:43511281_TGGCTAACACGGTGAAACCCC_T:rs7221167:rs16940904;rs2074404:rs991308…	34
ENSG00000159314	ARHGAP27	17	43471275	43511787	-1	protein_coding	201176	ARHGAP27	0.00125584	-0.761628	87	18.95	2604	1.38418e-06	5.78187e-11	GTEx/v8/Adipose_Visceral_Omentum:GTEx/v8/Artery_Aorta:GTEx/v8/Heart_Left_Ventricle	-	Yes	Promoter_anchored_loops	4.1e-16	rs16940904;rs546735951;17:43511281_TGGCTAACACGGTGAAACCCC_T;rs142925250;rs2732699;rs112557952;rs9913081;17:44286218_CA_C;rs2074404;rs549080390;17:44858598_CA_C;rs55938136;rs6503451;rs7225002;rs142925250:rs16940904;rs2074404:rs16940904:rs16940904;17:44286218_CA_C:rs16940904;rs112557952:rs6503451	34
ENSG00000184361	SPATA32	17	43331760	43339479	-1	protein_coding	124783	SPATA32	2.95265e-05	-0.414756	0	0	0	NA	NA	NA	NA	Yes	Promoter_anchored_loops:Fetal_Cortex:Left_Ventricle:Spleen:GM12878:IMR90:Mesenchymal_Stem_Cell:Mesendoderm	4.4e-16	rs16940904;rs546735951;17:43511281_TGGCTAACACGGTGAAACCCC_T;rs142925250:rs16940904;rs2732699;rs9913081;17:44286218_CA_C;rs112557952;rs2074404:rs16940904;17:44286218_CA_C:rs16940904;rs2074404:rs16940904:rs16940904;rs112557952:rs16940904;17:43511281_TGGCTAACACGGTGAAACCCC_T:rs7221167:rs16940904;rs2074404:rs9913081:rs16940904;rs2732699:rs16940904;rs2074404:rs6503451:rs16940904;rs549080390;17:44858598_…	34
ENSG00000259207	ITGB3	17	45331212	45421658	1	protein_coding	3690	ITGB3	0.1417	-0.214709	0	0	0	NA	NA	NA	NA	Yes	IMR90:Mesenchymal_Stem_Cell:Mesendoderm:Trophoblast-like_Cell:hESC	4.4e-16	rs16940904;rs56755526;rs2074404:rs16940904;rs56755526:rs16940904;17:44858598_CA_C;rs2732699;rs549080390;rs112557952:rs16940904;rs549080390:rs16940904;rs9913081;17:44286218_CA_C;17:44286218_CA_C:rs16940904:rs16940904;17:44286218_CA_C:rs16940904;rs9913081:rs16940904;rs2074404:rs7225002:rs16940904;rs112557952;rs2074404	34
ENSG00000259753	ITGB3	17	45331263	45421658	1	protein_coding	3690	ITGB3	NA	-0.214709	0	0	0	NA	NA	NA	NA	Yes	IMR90:Mesenchymal_Stem_Cell:Mesendoderm:Trophoblast-like_Cell:hESC	4.4e-16	rs16940904;rs56755526;rs2074404:rs16940904;rs56755526:rs16940904;17:44858598_CA_C;rs2732699;rs549080390;rs112557952:rs16940904;rs549080390:rs16940904;rs9913081;17:44286218_CA_C;17:44286218_CA_C:rs16940904:rs16940904;17:44286218_CA_C:rs16940904;rs9913081:rs16940904;rs2074404:rs7225002:rs16940904;rs112557952;rs2074404	34
ENSG00000189120	SP6	17	45922279	45933240	-1	protein_coding	80320	SP6	0.0229476	-1.12958	0	0	0	NA	NA	NA	NA	Yes	Mesenchymal_Stem_Cell:Mesendoderm	4.4e-16	rs16940904;rs2732699;rs9913081;17:44286218_CA_C;rs2074404:rs16940904;rs549080390;rs112557952:rs16940904;17:44858598_CA_C;17:44286218_CA_C:rs16940904:rs16940904;17:44286218_CA_C:rs16940904;rs9913081:rs16940904;rs2074404:rs7225002:rs16940904;rs112557952;rs56755526;rs56755526:rs16940904	34
ENSG00000120094	HOXB1	17	46605888	46608359	-1	protein_coding	3211	HOXB1	0.1152	-0.795582	0	0	0	NA	NA	NA	NA	Yes	Mesendoderm	4.4e-16	rs16940904;rs2732699;rs9913081;17:44286218_CA_C;rs2074404:rs16940904;rs549080390;rs112557952:rs16940904;17:44858598_CA_C;17:44286218_CA_C:rs16940904:rs16940904;17:44286218_CA_C:rs16940904;rs9913081:rs16940904;rs2074404:rs7225002:rs16940904;rs112557952;rs2074404	34
ENSG00000173917	HOXB2	17	46618256	46623441	-1	protein_coding	3212	HOXB2	0.00183831	0.974079	0	0	0	NA	NA	NA	NA	Yes	Mesendoderm	4.4e-16	rs16940904;rs2732699;rs9913081;17:44286218_CA_C;rs2074404:rs16940904;rs549080390;rs112557952:rs16940904;17:44858598_CA_C;17:44286218_CA_C:rs16940904:rs16940904;17:44286218_CA_C:rs16940904;rs9913081:rs16940904;rs2074404:rs7225002:rs16940904;rs112557952;rs2074404	34
ENSG00000126581	BECN1	17	40962152	40985367	-1	protein_coding	8678	BECN1	0.998698	-0.469388	0	0	0	NA	NA	NA	NA	Yes	Left_Ventricle	1.3e-15	rs16940904;rs546735951;17:43511281_TGGCTAACACGGTGAAACCCC_T;rs142925250:rs142925250:rs16940904;rs2732699:rs16940904;rs2732699;17:44286218_CA_C	34
ENSG00000131467	PSME3	17	40976402	40995774	1	protein_coding	10197	PSME3	0.988104	-1.7453	0	0	0	NA	NA	NA	NA	Yes	Left_Ventricle	1.3e-15	rs16940904;rs546735951;17:43511281_TGGCTAACACGGTGAAACCCC_T;rs142925250:rs142925250:rs16940904;rs2732699:rs16940904;rs2732699;17:44286218_CA_C	34
ENSG00000131480	AOC2	17	40996617	41002724	1	protein_coding	314	AOC2	5.1394e-10	0.0413506	0	0	0	NA	NA	NA	NA	Yes	Left_Ventricle	1.3e-15	rs16940904;rs546735951;17:43511281_TGGCTAACACGGTGAAACCCC_T;rs142925250:rs142925250:rs16940904;rs2732699:rs16940904;rs2732699;17:44286218_CA_C	34
ENSG00000184922	FMNL1	17	43298811	43324687	1	protein_coding	752	FMNL1	0.999687	NA	0	0	0	NA	NA	NA	NA	Yes	Promoter_anchored_loops:EP_correlation_cell_type_oneway:Adult_Cortex:Fetal_Cortex:GM12878:IMR90:Mesenchymal_Stem_Cell	1.3e-15	rs16940904;rs546735951;17:43511281_TGGCTAACACGGTGAAACCCC_T;rs142925250:rs16940904;rs2732699:rs16940904;rs2732699;17:44286218_CA_C	34
ENSG00000182963	GJC1	17	42875816	42908184	-1	protein_coding	10052	GJC1	0.944105	-2.78299	0	0	0	NA	NA	NA	NA	Yes	Promoter_anchored_loops	1.6e-15	rs16940904;rs546735951;17:43511281_TGGCTAACACGGTGAAACCCC_T;rs142925250:rs16940904;rs2732699;rs9913081;17:44286218_CA_C:rs16940904;17:44286218_CA_C;rs112557952:rs16940904:rs16940904;rs112557952:rs16940904;rs9913081:rs16940904;rs112557952	34
ENSG00000131095	GFAP	17	42982376	42994305	-1	protein_coding	2670	GFAP	2.22937e-05	-0.265503	0	0	0	NA	NA	NA	NA	Yes	Promoter_anchored_loops	2.2e-15	rs16940904;rs546735951;17:43511281_TGGCTAACACGGTGAAACCCC_T;rs142925250:17:43511281_TGGCTAACACGGTGAAACCCC_T:rs142925250:rs16940904;rs2732699;rs112557952:rs16940904;17:44286218_CA_C;rs2732699:rs16940904;rs9913081;17:44286218_CA_C:rs16940904;rs9913081:rs16940904:rs16940904	34
ENSG00000131097	HIGD1B	17	42923721	42927848	1	protein_coding	51751	HIGD1B	0.00234558	-0.344883	0	0	0	NA	NA	NA	NA	Yes	Fetal_Cortex	3.6e-15	rs72836561:rs16940904;rs546735951;17:43511281_TGGCTAACACGGTGAAACCCC_T;rs142925250:rs16940904;rs2732699;rs9913081;17:44286218_CA_C;rs112557952;rs2074404:rs6503451:rs16940904;rs112557952:rs16940904;17:44286218_CA_C:rs16940904:rs16940904;rs2074404:rs16940904;rs2732699:rs16940904	1 day, 9:34:00
ENSG00000168517	HEXIM2	17	43238067	43247407	1	protein_coding	124790	HEXIM2	0.368237	-0.798107	0	0	0	NA	NA	NA	NA	Yes	Adult_Cortex:Fetal_Cortex	3.6e-15	rs16940904;rs546735951;17:43511281_TGGCTAACACGGTGAAACCCC_T;rs142925250:rs16940904;rs2732699;rs9913081;17:44286218_CA_C;rs112557952:rs16940904;17:44286218_CA_C:rs16940904:rs16940904;17:44286218_CA_C:rs71279459:rs16940904;rs9913081:rs9303521:rs16940904;rs112557952;rs2074404:rs6503451:rs16940904;rs549080390;rs2732699:rs16940904;rs2074404:rs16940904;17:44858598_CA_C;rs2074404	34
ENSG00000158955	WNT9B	17	44910567	44964096	1	protein_coding	7484	WNT9B	0.0516168	NA	0	0	0	NA	NA	NA	NA	Yes	Promoter_anchored_loops:Adult_Cortex:Mesenchymal_Stem_Cell:hESC	6.5e-15	rs16940904:rs16940904;rs2732699;17:44286218_CA_C:rs16940904;17:44286218_CA_C;rs112557952;rs2074404:rs16940904;rs549080390;rs112557952:rs16940904;rs9913081;rs2732699:rs16940904;rs112557952:rs7225002:rs16940904;rs2074404:rs199470:rs16940904;17:44858598_CA_C;rs56755526;rs56755526:rs16940904	34
ENSG00000180329	CCDC43	17	42750437	42767147	-1	protein_coding	124808	CCDC43	0.000257178	-0.924708	0	0	0	NA	NA	NA	NA	Yes	Adult_Cortex:Liver	7.2e-15	rs16940904;rs2732699;rs549080390;17:44286218_CA_C;rs112557952:rs16940904;rs2732699:rs16940904;rs9913081;rs2074404:rs16940904:rs16940904;rs112557952;rs2074404:rs16940904;17:44858598_CA_C;rs112557952:rs72836561	1 day, 9:34:00
ENSG00000108883	EFTUD2	17	42927311	42977030	-1	protein_coding	9343	EFTUD2	0.999991	0.211209	0	0	0	NA	NA	NA	NA	Yes	Adult_Cortex	7.2e-15	rs16940904;rs546735951;17:43511281_TGGCTAACACGGTGAAACCCC_T;rs142925250:rs16940904;rs2732699;rs549080390;17:44286218_CA_C;rs112557952:rs16940904;rs2732699:rs16940904;rs9913081;rs2074404:rs16940904:rs16940904;rs112557952;rs2074404:rs16940904;17:44858598_CA_C	34
ENSG00000167131	CCDC103	17	42976510	42982758	1	protein_coding	388389	CCDC103	0.00218552	3.73457e-05	0	0	0	NA	NA	NA	NA	Yes	Adult_Cortex	7.2e-15	rs16940904;rs546735951;17:43511281_TGGCTAACACGGTGAAACCCC_T;rs142925250:rs16940904;rs2732699;rs549080390;17:44286218_CA_C;rs112557952:rs16940904;rs2732699:rs16940904;rs9913081;rs2074404:rs16940904:rs16940904;rs112557952;rs2074404:rs16940904;17:44858598_CA_C	34
ENSG00000214447	FAM187A	17	42977135	42982758	1	protein_coding	100528020	FAM187A	NA	NA	0	0	0	NA	NA	NA	NA	Yes	Adult_Cortex	7.2e-15	rs16940904;rs546735951;17:43511281_TGGCTAACACGGTGAAACCCC_T;rs142925250:rs16940904;rs2732699;rs549080390;17:44286218_CA_C;rs112557952:rs16940904;rs2732699:rs16940904;rs9913081;rs2074404:rs16940904:rs16940904;rs112557952;rs2074404:rs16940904;17:44858598_CA_C	34
ENSG00000228696	ARL17B	17	44352150	44439130	-1	protein_coding	100506084	ARL17B	NA	-0.428243	292	15.22	24	6.71269e-14	7.67102e-25	GTEx/v8/Adipose_Subcutaneous:GTEx/v8/Adipose_Visceral_Omentum:GTEx/v8/Artery_Aorta:GTEx/v8/Artery_Coronary:GTEx/v8/Artery_Tibial:GTEx/v8/Heart_Atrial_Appendage:GTEx/v8/Heart_Left_Ventricle:GTEx/v8/Liver:GTEx/v8/Pancreas	-	Yes	Promoter_anchored_loops	8.2e-15	rs16940904;rs2732699;rs549080390;17:44286218_CA_C;rs112557952;rs2074404;17:44858598_CA_C;rs9913081;rs2696531;rs71363586;rs7225002;rs2435200;rs9303521;rs6503451;rs112557952:rs16940904;rs2732699:rs16940904;rs2732699:rs2732699:rs16940904;rs112557952:rs2696531:rs16940904	34
ENSG00000181513	ACBD4	17	43209967	43221548	1	protein_coding	79777	ACBD4	1.82643e-05	-0.326407	0	0	1	9.3544e-06	2.53243e-07	GTEx/v8/Artery_Tibial	+	No	NA	3.8e-13	rs16940904;rs35076622	34
ENSG00000161647	MPP3	17	41878167	41910538	-1	protein_coding	4356	MPP3	1.99786e-05	NA	1	3.26	0	NA	NA	NA	NA	Yes	Aorta:Left_Ventricle:Liver:Lung:Pancreas:Right_Ventricle:GM12878:IMR90:Mesenchymal_Stem_Cell:Mesendoderm:Trophoblast-like_Cell:hESC	2.6e-12	rs72836561;rs72836561:rs16940904;rs56755526;rs2074404:rs16940904;rs56755526:rs16940904;17:44858598_CA_C;rs2732699;rs549080390;rs112557952:rs16940904	1 day, 9:34:00
ENSG00000178852	EFCAB13	17	45400656	45518678	1	protein_coding	124989	EFCAB13	8.21992e-19	-0.190445	0	0	0	NA	NA	NA	NA	Yes	Mesenchymal_Stem_Cell:Mesendoderm:hESC	2.6e-12	rs16940904;rs56755526;rs2074404:rs16940904;rs56755526:rs16940904;17:44858598_CA_C;rs2732699;rs549080390;rs112557952:rs16940904	34
ENSG00000073861	TBX21	17	45810610	45823485	1	protein_coding	30009	TBX21	0.963243	0.0831505	0	0	0	NA	NA	NA	NA	Yes	Mesenchymal_Stem_Cell	2.6e-12	rs16940904;rs56755526;rs2074404:rs16940904;rs56755526:rs16940904;17:44858598_CA_C;rs2732699;rs549080390;rs112557952:rs16940904	34
ENSG00000108439	PNPO	17	46018872	46025654	1	protein_coding	55163	PNPO	3.71896e-05	0.17935	0	0	0	NA	NA	NA	NA	Yes	Mesendoderm	2.6e-12	rs16940904;rs56755526;rs2074404:rs16940904;rs56755526:rs16940904;17:44858598_CA_C;rs2732699;rs549080390;rs112557952:rs16940904	34
ENSG00000167183	PRR15L	17	46029333	46035244	-1	protein_coding	79170	PRR15L	0.481247	0.303263	0	0	0	NA	NA	NA	NA	Yes	Mesendoderm	2.6e-12	rs16940904;rs56755526;rs2074404:rs16940904;rs56755526:rs16940904;17:44858598_CA_C;rs2732699;rs549080390;rs112557952:rs16940904	34
ENSG00000186834	HEXIM1	17	43224684	43229468	1	protein_coding	10614	HEXIM1	0.9444	-1.49531	0	0	0	NA	NA	NA	NA	Yes	Promoter_anchored_loops	5.5e-12	rs16940904;rs546735951;17:43511281_TGGCTAACACGGTGAAACCCC_T;rs142925250	34
ENSG00000161692	DBF4B	17	42785976	42829632	1	protein_coding	80174	DBF4B	4.43214e-08	-0.507761	0	0	0	NA	NA	NA	NA	Yes	Promoter_anchored_loops:Liver	8e-12	rs16940904;rs546735951;17:43511281_TGGCTAACACGGTGAAACCCC_T;rs142925250:rs72836561	1 day, 9:34:00
ENSG00000136448	NMT1	17	43128978	43186384	1	protein_coding	4836	NMT1	0.998501	0.0324477	0	0	3	0.000115199	2.03105e-24	GTEx/v8/Adipose_Subcutaneous:GTEx/v8/Pancreas	+	Yes	Promoter_anchored_loops	2.6e-11	rs9303521;rs71279459;rs16940904;rs546735951;17:43511281_TGGCTAACACGGTGAAACCCC_T;rs142925250:rs546735951	34
ENSG00000108861	DUSP3	17	41843489	41856356	-1	protein_coding	1845	DUSP3	0.736745	0.986547	1	1.893	0	NA	NA	NA	NA	Yes	Left_Ventricle:Liver:IMR90:Mesenchymal_Stem_Cell:Mesendoderm:Trophoblast-like_Cell:hESC	3.3e-08	rs72836561	33
ENSG00000231256	C17orf105	17	41857803	41864980	1	protein_coding	284067	C17orf105	NA	-0.266736	1	3.26	0	NA	NA	NA	NA	Yes	Left_Ventricle:Liver:IMR90:Mesenchymal_Stem_Cell:Mesendoderm:Trophoblast-like_Cell:hESC	3.3e-08	rs72836561	33
ENSG00000161649	CD300LG	17	41924516	41940997	1	protein_coding	146894	CD300LG	0.0299351	-0.286689	1	17.23	0	NA	NA	NA	NA	Yes	Left_Ventricle:IMR90:Mesenchymal_Stem_Cell:Mesendoderm:Trophoblast-like_Cell:hESC	3.3e-08	rs72836561	33
ENSG00000131096	PYY	17	42030106	42081837	-1	protein_coding	5697	PYY	0.0544166	-0.0751033	0	0	0	NA	NA	NA	NA	Yes	IMR90:Mesenchymal_Stem_Cell	3.3e-08	rs72836561	33
ENSG00000161653	NAGS	17	42081914	42086431	1	protein_coding	162417	NAGS	4.88884e-05	-0.0216192	0	0	0	NA	NA	NA	NA	Yes	IMR90:Mesenchymal_Stem_Cell	3.3e-08	rs72836561	33
ENSG00000091947	TMEM101	17	42088556	42101314	-1	protein_coding	84336	TMEM101	0.161636	-0.333977	0	0	0	NA	NA	NA	NA	Yes	IMR90:Mesenchymal_Stem_Cell	3.3e-08	rs72836561	33
ENSG00000161654	LSM12	17	42112003	42144987	-1	protein_coding	124801	LSM12	0.931682	-1.27818	0	0	0	NA	NA	NA	NA	Yes	IMR90	3.3e-08	rs72836561	33
ENSG00000141349	G6PC3	17	42148103	42153709	1	protein_coding	92579	G6PC3	1.07483e-05	-0.0329476	0	0	0	NA	NA	NA	NA	Yes	IMR90	3.3e-08	rs72836561	33
ENSG00000089558	KCNH4	17	40308909	40333296	-1	protein_coding	23415	KCNH4	0.999979	-0.452983	0	0	0	NA	NA	NA	NA	Yes	Left_Ventricle	1.7e-07	rs72836561	33
ENSG00000161610	HCRT	17	40336078	40337470	-1	protein_coding	3060	HCRT	0.50244	-0.292071	0	0	0	NA	NA	NA	NA	Yes	Left_Ventricle	1.7e-07	rs72836561	33
ENSG00000167925	GHDC	17	40340817	40346531	-1	protein_coding	84514	GHDC	2.12125e-05	-0.790743	0	0	0	NA	NA	NA	NA	Yes	Left_Ventricle	1.7e-07	rs72836561	33
ENSG00000131475	VPS25	17	40925454	40931617	1	protein_coding	84313	VPS25	0.735078	-0.403388	0	0	0	NA	NA	NA	NA	Yes	Left_Ventricle	1.7e-07	rs72836561	33
ENSG00000126562	WNK4	17	40932696	40948954	1	protein_coding	65266	WNK4	1.82874e-13	NA	0	0	0	NA	NA	NA	NA	Yes	Left_Ventricle	1.7e-07	rs72836561	33
ENSG00000183978	COA3	17	40947165	40950722	-1	protein_coding	28958	COA3	0.00470838	-0.471663	0	0	0	NA	NA	NA	NA	Yes	Left_Ventricle	1.7e-07	rs72836561	33
ENSG00000176563	CNTD1	17	40950810	40963605	1	protein_coding	124817	CNTD1	0.0218345	-0.681431	0	0	0	NA	NA	NA	NA	Yes	Left_Ventricle	1.7e-07	rs72836561	33
ENSG00000175906	ARL4D	17	41476327	41478505	1	protein_coding	379	ARL4D	0.13243	0.197623	0	0	0	NA	NA	NA	NA	Yes	GM12878:IMR90:Mesenchymal_Stem_Cell:Mesendoderm:Trophoblast-like_Cell:hESC	1.7e-07	rs72836561	33
ENSG00000067596	DHX8	17	41561233	41621831	1	protein_coding	1659	DHX8	0.934509	-0.600362	0	0	0	NA	NA	NA	NA	Yes	Left_Ventricle:IMR90:Mesenchymal_Stem_Cell:Mesendoderm:Trophoblast-like_Cell:hESC	1.7e-07	rs72836561	33
ENSG00000175832	ETV4	17	41605212	41656988	-1	protein_coding	2118	ETV4	0.00270291	-0.540761	0	0	0	NA	NA	NA	NA	Yes	Aorta:Left_Ventricle:Liver:Spleen:GM12878:IMR90:Mesenchymal_Stem_Cell:Mesendoderm:Trophoblast-like_Cell:hESC	1.7e-07	rs72836561	33
ENSG00000167941	SOST	17	41831099	41836156	-1	protein_coding	50964	SOST	0.379603	-0.581487	1	1.893	0	NA	NA	NA	NA	Yes	Adult_Cortex:Left_Ventricle:Liver:IMR90:Mesenchymal_Stem_Cell:Mesendoderm:Trophoblast-like_Cell:hESC	1.7e-07	rs72836561	33
ENSG00000108309	RUNDC3A	17	42385781	42396039	1	protein_coding	10900	RUNDC3A	0.960334	NA	0	0	0	NA	NA	NA	NA	Yes	IMR90	1.7e-07	rs72836561	33
ENSG00000266997	RP11-886H22.1	18	47322163	47363993	-1	protein_coding	NA	NA	NA	NA	9	5.664	0	NA	NA	NA	NA	Yes	Left_Ventricle:Liver:Spleen:GM12878:IMR90:Mesenchymal_Stem_Cell:Mesendoderm:Trophoblast-like_Cell:hESC	2.3e-22	rs6417108;rs10639158;rs80175721;rs80204526:rs6417108:rs10639158:rs9964067;rs9947678:rs9964067:rs9947678:rs7505997:rs80175721:rs2000827:rs11662596:rs77960347;rs80204526:rs77960347:rs4121823:rs1105654:rs28666039:rs7229377:rs34802337:rs11663245:rs73959582:rs7235080:rs11662059:rs7230869:rs9304381:rs7229658:rs35739561:rs7228085:rs9947684:rs374401823:rs9304381;rs1540037:rs118043171:rs4939888:rs1540037:…	35
ENSG00000184828	ZBTB7C	18	45553044	45937123	-1	protein_coding	201501	ZBTB7C	0.907221	-0.0627471	0	0	0	NA	NA	NA	NA	Yes	IMR90:Mesenchymal_Stem_Cell	4.4e-22	rs35739561:rs7228085:rs9304381:rs9947684:rs374401823:rs9304381;rs1540037:rs118043171:rs7230869:rs4939888:rs1540037:rs763363223:rs62101765:rs7505352:rs12456227:rs62101765;rs12456227:rs763363223;rs12456227:rs11875988;rs62101773:rs80175721:rs11875988:rs763363223;rs11875988:rs62101773:18:47211493_ACATC_A:rs2000827:rs6507945:rs12965067:rs6507945;rs12965067:rs6417108:rs7505997:rs9964067;rs9947678:rs996…	35
ENSG00000177576	C18orf32	18	47008028	47013622	-1	protein_coding	497661	C18orf32	0.182753	-0.238184	0	0	1	4.56943e-05	7.11808e-09	GTEx/v8/Adipose_Visceral_Omentum	+	Yes	Promoter_anchored_loops:Adult_Cortex:Fetal_Cortex:Aorta:Left_Ventricle:Liver:Spleen:GM12878:IMR90:Mesenchymal_Stem_Cell:Mesendoderm:Neural_Progenitor_Cell:Trophoblast-like_Cell:hESC	4.4e-22	rs73959582;rs6417108:rs35739561:rs9304381;rs1540037:rs9304381:rs7230869:rs4939888:rs62101765:rs763363223;rs12456227:rs763363223:rs11875988;rs62101773:rs80175721:rs2000827:rs6507945:rs12965067:rs7505997:rs9947678:rs6507945;rs12965067:rs9964067;rs9947678:rs9964067:rs10639158:rs11875988:rs763363223;rs11875988:rs62101773:18:47211493_ACATC_A:rs1974410:rs80204526:rs7228085:rs9947684:rs374401823:rs11804…	35
ENSG00000215472	RPL17-C18orf32	18	47008051	47017956	-1	protein_coding	100526842	RPL17-C18orf32	0.605942	-0.340213	0	0	0	NA	NA	NA	NA	Yes	Promoter_anchored_loops:Adult_Cortex:Fetal_Cortex:Aorta:Left_Ventricle:Liver:Spleen:GM12878:IMR90:Mesenchymal_Stem_Cell:Mesendoderm:Neural_Progenitor_Cell:Trophoblast-like_Cell:hESC	4.4e-22	rs6417108:rs35739561:rs9304381;rs1540037:rs9304381:rs7230869:rs4939888:rs62101765:rs763363223;rs12456227:rs763363223:rs11875988;rs62101773:rs80175721:rs2000827:rs6507945:rs12965067:rs7505997:rs9947678:rs6507945;rs12965067:rs9964067;rs9947678:rs9964067:rs10639158:rs11875988:rs763363223;rs11875988:rs62101773:18:47211493_ACATC_A:rs1974410:rs80204526:rs7228085:rs9947684:rs374401823:rs118043171:rs1540…	35
ENSG00000265681	RPL17	18	47014851	47018906	-1	protein_coding	6139	RPL17	0.494059	0.186984	0	0	0	NA	NA	NA	NA	Yes	Promoter_anchored_loops:Adult_Cortex:Fetal_Cortex:Aorta:Left_Ventricle:Liver:Spleen:GM12878:IMR90:Mesenchymal_Stem_Cell:Mesendoderm:Neural_Progenitor_Cell:Trophoblast-like_Cell:hESC	4.4e-22	rs6417108:rs35739561:rs9304381;rs1540037:rs9304381:rs7230869:rs4939888:rs62101765:rs763363223;rs12456227:rs763363223:rs11875988;rs62101773:rs80175721:rs2000827:rs6507945:rs12965067:rs7505997:rs9947678:rs6507945;rs12965067:rs9964067;rs9947678:rs9964067:rs10639158:rs11875988:rs763363223;rs11875988:rs62101773:18:47211493_ACATC_A:rs1974410:rs80204526:rs7228085:rs9947684:rs374401823:rs118043171:rs1540…	35
ENSG00000167315	ACAA2	18	47309869	47340330	-1	protein_coding	10449	ACAA2	NA	NA	8	5.664	15	3.2722e-05	6.07479e-14	GTEx/v8/Pancreas	-	Yes	Promoter_anchored_loops:Adult_Cortex:Fetal_Cortex:Left_Ventricle:Liver:IMR90:Mesenchymal_Stem_Cell:Mesendoderm:hESC	4.4e-22	rs2000827;rs6417108;rs10639158;rs11662596:rs6417108:rs62101765:rs763363223;rs12456227:rs763363223:rs11875988;rs62101773:rs80175721:rs2000827:rs9947678:rs80204526:rs77960347;rs80204526:rs77960347:rs4121823:rs35739561:rs7228085:rs9304381:rs9947684:rs374401823:rs9304381;rs1540037:rs118043171:rs7230869:rs4939888:rs1540037:rs7505352:rs12456227:rs62101765;rs12456227:rs11875988:rs763363223;rs11875988:rs…	35
ENSG00000101670	LIPG	18	47087069	47119272	1	protein_coding	9388	LIPG	8.3557e-05	-0.0575627	16	24.1	0	NA	NA	NA	NA	Yes	Promoter_anchored_loops:Adult_Cortex:Fetal_Cortex:Liver:IMR90:Mesenchymal_Stem_Cell:Mesendoderm:hESC	8.2e-22	rs11662596;rs77960347;rs80204526;rs4121823;rs1105654;rs6417108:rs2000827:rs62101765:rs763363223;rs12456227:rs763363223:rs11875988;rs62101773:rs80175721:rs35739561:rs9304381;rs1540037:rs9304381:rs7230869:rs4939888:rs6507945:rs12965067:rs7505997:rs11875988:rs763363223;rs11875988:rs62101773:18:47211493_ACATC_A:rs10639158:rs6507945;rs12965067:rs9964067;rs9947678:rs9964067:rs9947678	35
ENSG00000172361	CCDC11	18	47753563	47792892	-1	protein_coding	220136	CCDC11	1.5988e-13	-0.596743	0	0	0	NA	NA	NA	NA	Yes	Adult_Cortex:Fetal_Cortex:IMR90:Mesenchymal_Stem_Cell:Mesendoderm:hESC	8.2e-22	rs6417108:rs35739561:rs9304381;rs1540037:rs9304381:rs7230869:rs4939888:rs62101765:rs763363223;rs12456227:rs763363223:rs11875988;rs62101773:rs80175721:rs2000827:rs80204526:rs9947678:rs1974410	35
ENSG00000167306	MYO5B	18	47349183	47721463	-1	protein_coding	4645	MYO5B	5.42317e-10	0.470846	126	18.42	0	NA	NA	NA	NA	Yes	Left_Ventricle:Liver:IMR90:Mesenchymal_Stem_Cell:Mesendoderm:Trophoblast-like_Cell:hESC	4.1e-16	rs6417108;rs80175721;rs2000827;rs9947678;rs1974410;rs80204526:rs9947678:rs6417108:rs2000827:rs11662596:rs77960347;rs80204526:rs77960347:rs4121823:rs1974410:rs80175721:rs10639158:rs9964067;rs9947678:rs9964067:rs7505997	35
ENSG00000154839	SKA1	18	47901365	47920543	1	protein_coding	220134	SKA1	1.32266e-06	0.423231	0	0	0	NA	NA	NA	NA	Yes	Left_Ventricle:GM12878:IMR90:Mesenchymal_Stem_Cell:Mesendoderm	2.1e-13	rs80204526:rs80175721:rs2000827:rs6417108:rs1974410:rs9947678	35
ENSG00000141627	DYM	18	46570039	46987717	-1	protein_coding	54808	DYM	5.18112e-09	-0.135201	0	0	0	NA	NA	NA	NA	Yes	Left_Ventricle:Mesenchymal_Stem_Cell:Mesendoderm:hESC	9.1e-12	rs6417108:rs10639158:rs80175721:rs2000827:rs9947678:rs9964067;rs9947678:rs9964067:rs7505997	35
ENSG00000267228	IER3IP1	18	44661027	44702652	-1	protein_coding	51124	IER3IP1	NA	-0.130294	0	0	0	NA	NA	NA	NA	Yes	Mesenchymal_Stem_Cell	3.8e-11	rs9947678:rs6417108:rs2000827	35
ENSG00000134049	IER3IP1	18	44681413	44702745	-1	protein_coding	51124	IER3IP1	0.0184347	-0.130294	0	0	0	NA	NA	NA	NA	Yes	Mesenchymal_Stem_Cell	3.8e-11	rs9947678:rs6417108:rs2000827	35
ENSG00000215474	SKOR2	18	44746293	44775554	-1	protein_coding	652991	SKOR2	0.611171	-0.166851	0	0	0	NA	NA	NA	NA	Yes	IMR90:Mesenchymal_Stem_Cell	3.8e-11	rs9947678:rs6417108:rs2000827:rs1974410	35
ENSG00000206181	TCEB3B	18	44558943	44561988	-1	protein_coding	51224	TCEB3B	1.80368e-08	-0.0152545	0	0	0	NA	NA	NA	NA	Yes	Mesenchymal_Stem_Cell	1e-09	rs2000827:rs6417108:rs1974410	35
ENSG00000154832	CXXC1	18	47808713	47814674	-1	protein_coding	30827	CXXC1	0.997862	-0.476983	0	0	0	NA	NA	NA	NA	Yes	Promoter_anchored_loops	1.4e-07	rs6417108	35
ENSG00000187664	HAPLN4	19	19366450	19373605	-1	protein_coding	404037	HAPLN4	0.0326848	0.204998	19	26.2	183	6.79586e-20	6.88492e-19	GTEx/v8/Adipose_Subcutaneous:GTEx/v8/Adipose_Visceral_Omentum:GTEx/v8/Artery_Aorta:GTEx/v8/Artery_Coronary:GTEx/v8/Artery_Tibial:GTEx/v8/Heart_Atrial_Appendage:GTEx/v8/Heart_Left_Ventricle	-	Yes	EP_correlation_cell_type_oneway	5.9e-55	rs11882123;rs58542926;rs2285626;19:19510831_AT_A;rs182611493;rs17216693;rs8100204	37
ENSG00000213996	TM6SF2	19	19375173	19384200	-1	protein_coding	53345	TM6SF2	1.93541e-05	NA	35	26.2	251	1.17275e-20	8.90299e-16	GTEx/v8/Adipose_Subcutaneous:GTEx/v8/Adipose_Visceral_Omentum:GTEx/v8/Artery_Aorta:GTEx/v8/Artery_Tibial:GTEx/v8/Heart_Atrial_Appendage:GTEx/v8/Heart_Left_Ventricle	-	Yes	Promoter_anchored_loops:Adult_Cortex:Fetal_Cortex	5.9e-55	rs58542926;rs11882123;rs2285626;19:19510831_AT_A;rs182611493;rs35431065;rs8100204;rs17216693;19:19756073_AGCC_A;rs143729015:rs58542926:rs2285626;19:19510831_AT_A:rs11882123:rs58542926;rs2285626:rs2285626:rs182611493:rs3761077:rs58542926;rs3761077:rs144787624	37
ENSG00000105705	SUGP1	19	19386827	19431653	-1	protein_coding	57794	SUGP1	0.999636	NA	84	26.2	4	3.15025e-05	5.87709e-05	GTEx/v8/Heart_Left_Ventricle	+	Yes	Promoter_anchored_loops:EP_correlation_cell_type_oneway	5.9e-55	rs11882123;rs58542926;rs182611493;rs2285626;19:19510831_AT_A;rs35431065;rs8100204;rs73001020;rs17216693;19:19438110_GTATT_G;rs11882123:rs2285626:rs2285626	37
ENSG00000105726	ATP13A1	19	19756007	19774502	-1	protein_coding	57130	ATP13A1	0.994474	NA	2	8.763	94	3.16696e-16	9.80314e-12	GTEx/v8/Adipose_Subcutaneous:GTEx/v8/Adipose_Visceral_Omentum:GTEx/v8/Artery_Aorta:GTEx/v8/Artery_Coronary:GTEx/v8/Artery_Tibial:GTEx/v8/Heart_Atrial_Appendage:GTEx/v8/Heart_Left_Ventricle:GTEx/v8/Liver	-	Yes	Promoter_anchored_loops:Adult_Cortex:Fetal_Cortex	5.9e-55	rs58542926;19:19756073_AGCC_A;rs143729015;rs61061000;rs3761077;rs35431065;rs8100204;rs73001020;rs17216693;rs2285626;19:19510831_AT_A;rs11882123;19:19756073_AGCC_A:19:19756073_AGCC_A:rs11882123:rs58542926:rs2285626:rs144787624:rs117414940	37
ENSG00000064607	SUGP2	19	19101697	19144832	-1	protein_coding	10147	SUGP2	0.999367	0.523631	5	6.776	31	6.38872e-07	4.0018e-05	GTEx/v8/Adipose_Subcutaneous	-	Yes	Adult_Cortex:Fetal_Cortex:IMR90:Mesenchymal_Stem_Cell:Mesendoderm:hESC	1.7e-54	rs143729015;rs73001020;rs11085253;rs61061000;rs143729015:rs11085253:rs61061000:rs11882123:rs58542926:rs2285626:rs144787624:rs182611493:rs3761077:rs58542926;rs3761077:rs2285626;19:19510831_AT_A:19:19510831_AT_A:rs58542926;rs2285626:rs73001020:rs73001020;rs143729015:rs61061000;rs28672836:rs28672836	37
ENSG00000105676	ARMC6	19	19144384	19170563	1	protein_coding	93436	ARMC6	7.24408e-07	NA	1	0.21	0	NA	NA	NA	NA	Yes	Adult_Cortex:Fetal_Cortex:IMR90:Mesenchymal_Stem_Cell:Mesendoderm:hESC	1.7e-54	rs143729015;rs143729015:rs11085253:rs61061000:rs11882123:rs58542926:rs2285626:rs144787624:rs182611493:rs3761077:rs58542926;rs3761077:rs2285626;19:19510831_AT_A:19:19510831_AT_A:rs58542926;rs2285626:rs73001020:rs73001020;rs143729015:rs61061000;rs28672836:rs28672836	37
ENSG00000130287	NCAN	19	19322782	19363042	1	protein_coding	1463	NCAN	0.154547	-1.28077	8	23	0	NA	NA	NA	NA	Yes	EP_correlation_cell_type_oneway:Adult_Cortex:Fetal_Cortex	1.7e-54	rs182611493;rs3761077;rs58542926;rs11882123;rs58542926:rs2285626;19:19510831_AT_A:rs11882123:rs58542926;rs2285626:rs2285626:rs182611493:19:19510831_AT_A:rs144787624	37
ENSG00000250067	YJEFN3	19	19627036	19648390	1	protein_coding	374887	YJEFN3	2.63543e-06	NA	23	19.09	209	2.19112e-15	3.19891e-16	GTEx/v8/Adipose_Subcutaneous:GTEx/v8/Adipose_Visceral_Omentum:GTEx/v8/Artery_Aorta:GTEx/v8/Artery_Tibial:GTEx/v8/Heart_Atrial_Appendage:GTEx/v8/Heart_Left_Ventricle:GTEx/v8/Liver:GTEx/v8/Pancreas	+	Yes	Adult_Cortex	1.7e-54	rs11882123;rs144787624;rs2285626;rs17216693;19:19510831_AT_A;rs58542926;rs73001020;19:19756073_AGCC_A;rs143729015;rs12985293;rs11882123:rs2285626	37
ENSG00000197124	ZNF682	19	20107867	20150315	-1	protein_coding	91120	ZNF682	3.67329e-09	1.21204	0	0	1	9.3218e-05	0.00051934	GTEx/v8/Artery_Tibial	-	No	NA	1.7e-54	rs58542926	37
ENSG00000064545	TMEM161A	19	19229978	19249322	-1	protein_coding	54929	TMEM161A	2.04659e-06	-0.270254	0	0	0	NA	NA	NA	NA	Yes	Mesenchymal_Stem_Cell:Mesendoderm	1.4e-46	rs143729015:rs58542926;rs2285626:rs11882123:rs2285626;19:19510831_AT_A:rs73001020:rs2285626:rs182611493:rs58542926:rs144787624	37
ENSG00000129933	MAU2	19	19431490	19469563	1	protein_coding	23383	MAU2	0.999718	0.0144236	86	15.92	20	2.45442e-05	0.0377692	GTEx/v8/Heart_Atrial_Appendage	+	Yes	Promoter_anchored_loops:EP_correlation_cell_type_oneway	1.4e-46	rs2285626;19:19510831_AT_A;rs11882123;rs58542926;19:19438110_GTATT_G;rs73001020;rs182611493;rs144787624;rs11882123:rs2285626:rs2285626	37
ENSG00000167491	GATAD2A	19	19496635	19619740	1	protein_coding	54815	GATAD2A	0.995363	-0.496926	122	19.09	29	9.95736e-06	0.0106309	GTEx/v8/Adipose_Subcutaneous	-	Yes	EP_correlation_cell_type_oneway:Adult_Cortex:Fetal_Cortex	1.4e-46	rs11882123;rs2285626;19:19510831_AT_A;rs58542926;19:19756073_AGCC_A;rs17216693;19:19503203_GT_G;rs73001020;rs77653002;rs144787624;rs143729015:rs11882123:rs58542926:rs2285626;19:19510831_AT_A:rs58542926;rs2285626:rs2285626:rs144787624	37
ENSG00000268193	AC002985.3	19	19017822	19045206	-1	protein_coding	NA	NA	NA	NA	0	0	0	NA	NA	NA	NA	Yes	Adult_Cortex:Fetal_Cortex	1.5e-45	rs143729015:rs58542926:rs2285626;19:19510831_AT_A:rs11882123:rs58542926;rs2285626:rs2285626:rs144787624	37
ENSG00000064489	MEF2BNB-MEF2B	19	19256376	19302967	-1	protein_coding	4207	MEF2BNB-MEF2B	0.247288	-0.149548	108	12.47	0	NA	NA	NA	NA	Yes	Promoter_anchored_loops:Adult_Cortex:Fetal_Cortex	1.5e-45	rs61061000;rs28672836;rs11085253;rs73001020:rs2285626;rs17216693;19:19510831_AT_A:rs11882123:rs2285626;19:19510831_AT_A:rs2285626:rs143729015:rs182611493:rs3761077:rs58542926;rs3761077:rs58542926:rs58542926;rs2285626:rs144787624	37
ENSG00000213999	MEF2B	19	19256377	19303400	-1	protein_coding	100271849	MEF2B	0.590447	NA	108	12.47	45	3.23375e-08	0.000173774	GTEx/v8/Adipose_Subcutaneous:GTEx/v8/Artery_Aorta:GTEx/v8/Pancreas	+	Yes	Promoter_anchored_loops:Adult_Cortex:Fetal_Cortex	1.5e-45	rs61061000;rs28672836;rs11085253;rs73001020:rs2285626;rs17216693;19:19510831_AT_A:rs11882123:rs2285626;19:19510831_AT_A:rs2285626:rs143729015:rs182611493:rs3761077:rs58542926;rs3761077:rs58542926:rs58542926;rs2285626:rs144787624	37
ENSG00000254901	MEF2BNB	19	19287712	19303400	-1	protein_coding	729991	MEF2BNB	NA	0.579437	60	12.34	58	7.7977e-15	3.62201e-19	GTEx/v8/Adipose_Subcutaneous:GTEx/v8/Adipose_Visceral_Omentum:GTEx/v8/Artery_Aorta:GTEx/v8/Artery_Tibial	-	Yes	Promoter_anchored_loops:Adult_Cortex:Fetal_Cortex	1.5e-45	rs61061000;rs11085253;rs73001020:rs2285626;rs17216693;19:19510831_AT_A:rs11882123:rs2285626;19:19510831_AT_A:rs2285626:rs143729015:rs182611493:rs3761077:rs58542926;rs3761077:rs58542926:rs58542926;rs2285626:rs144787624	37
ENSG00000064490	RFXANK	19	19303008	19312678	1	protein_coding	8625	RFXANK	0.000671164	0.789997	20	9.408	3	0.000100607	0.0177117	GTEx/v8/Artery_Tibial	+	Yes	Promoter_anchored_loops:Adult_Cortex:Fetal_Cortex	1.5e-45	rs11085253;rs61061000;rs182611493;rs73001020;rs73001020:rs2285626;rs17216693;19:19510831_AT_A:rs11882123:rs2285626;19:19510831_AT_A:rs2285626:rs143729015:rs182611493:rs3761077:rs58542926;rs3761077:rs58542926:rs58542926;rs2285626:rs144787624	37
ENSG00000160161	CILP2	19	19649057	19657468	1	protein_coding	148113	CILP2	0.000278936	-0.132917	16	11.63	154	2.34002e-13	7.52088e-21	GTEx/v8/Adipose_Subcutaneous:GTEx/v8/Adipose_Visceral_Omentum:GTEx/v8/Artery_Aorta:GTEx/v8/Artery_Coronary:GTEx/v8/Artery_Tibial:GTEx/v8/Heart_Atrial_Appendage	-	Yes	Adult_Cortex:Fetal_Cortex:Mesenchymal_Stem_Cell	1.5e-45	rs11882123;rs2285626;rs17216693;19:19510831_AT_A;rs58542926;rs12985293;rs182611493:rs3761077:rs58542926;rs3761077:rs58542926:rs2285626;19:19510831_AT_A:rs11882123:rs58542926;rs2285626:rs2285626:rs144787624:rs2285626;19:19510831_AT_A:rs12985293:rs58542926;19:19756073_AGCC_A	37
ENSG00000181896	ZNF101	19	19779605	19794318	1	protein_coding	94039	ZNF101	5.76614e-07	-0.00197425	3	11.91	38	2.56484e-05	0.0223002	GTEx/v8/Adipose_Subcutaneous	-	Yes	Promoter_anchored_loops:EP_correlation_cell_type_oneway:Adult_Cortex:Fetal_Cortex	1.5e-45	19:19756073_AGCC_A;rs61061000;rs58542926;rs3761077;rs11882123:rs58542926;19:19756073_AGCC_A:19:19756073_AGCC_A:rs58542926:rs2285626:rs144787624:rs117414940	37
ENSG00000081665	ZNF506	19	19896648	19932560	-1	protein_coding	440515	ZNF506	1.99613e-08	-0.2984	0	0	15	4.66246e-05	1.69948e-26	GTEx/v8/Adipose_Subcutaneous:GTEx/v8/Heart_Left_Ventricle	-	Yes	Left_Ventricle:Liver:GM12878:IMR90:Mesenchymal_Stem_Cell:Mesendoderm:Trophoblast-like_Cell:hESC	1.5e-45	rs58542926;rs17216693;19:19756073_AGCC_A;rs73001020;rs2285626;rs12985293;rs117414940:rs12985293:rs58542926;19:19756073_AGCC_A:19:19756073_AGCC_A	37
ENSG00000105642	KCNN1	19	18062102	18110889	1	protein_coding	3780	KCNN1	0.9317	NA	0	0	0	NA	NA	NA	NA	Yes	Fetal_Cortex	2.1e-45	rs143729015:rs58542926:rs2285626;19:19510831_AT_A:rs11882123:rs58542926;rs2285626:rs2285626	37
ENSG00000184162	NR2C2AP	19	19312225	19314233	-1	protein_coding	126382	NR2C2AP	0.527168	-0.417894	1	0.149	0	NA	NA	NA	NA	Yes	Fetal_Cortex	2.1e-45	rs182611493;rs11085253:rs61061000:rs58542926;rs2285626:rs11882123:rs2285626;19:19510831_AT_A:rs73001020:rs58542926:rs2285626	37
ENSG00000105708	ZNF14	19	19821280	19843906	-1	protein_coding	7561	ZNF14	5.71583e-16	-0.140934	1	0.401	0	NA	NA	NA	NA	Yes	EP_correlation_cell_type_oneway:Fetal_Cortex	2.1e-45	rs117414940;rs58542926:rs2285626;19:19510831_AT_A:rs11882123:rs58542926;rs2285626:rs2285626:19:19756073_AGCC_A	37
ENSG00000223802	CERS1	19	18979361	19007536	-1	protein_coding	10715	CERS1	0.045457	NA	0	0	0	NA	NA	NA	NA	Yes	Promoter_anchored_loops	3.2e-44	rs11882123:rs2285626:rs2285626;19:19510831_AT_A:rs58542926;rs2285626:rs182611493:rs2285626;rs17216693;19:19510831_AT_A	37
ENSG00000130283	GDF1	19	18979361	19006905	-1	protein_coding	2657	GDF1	0.544924	NA	0	0	0	NA	NA	NA	NA	Yes	Promoter_anchored_loops	3.2e-44	rs11882123:rs2285626:rs2285626;19:19510831_AT_A:rs58542926;rs2285626:rs182611493:rs2285626;rs17216693;19:19510831_AT_A	37
ENSG00000105717	PBX4	19	19672522	19729725	-1	protein_coding	80714	PBX4	0.00677213	-0.679897	27	8.295	0	NA	NA	NA	NA	Yes	Fetal_Cortex	2.6e-42	rs12985293;rs58542926;rs17216693;19:19756073_AGCC_A	37
ENSG00000184635	ZNF93	19	20011722	20046384	1	protein_coding	81931	ZNF93	0.00169182	0.174729	0	0	0	NA	NA	NA	NA	Yes	Fetal_Cortex:Aorta:Left_Ventricle:Liver:IMR90:Mesenchymal_Stem_Cell:Mesendoderm:Trophoblast-like_Cell:hESC	2.6e-42	rs117414940:rs12985293:rs58542926;19:19756073_AGCC_A:19:19756073_AGCC_A	37
ENSG00000268461	AC007204.1	19	20047769	20048639	-1	protein_coding	NA	NA	NA	NA	0	0	0	NA	NA	NA	NA	Yes	Left_Ventricle:Liver:Spleen:GM12878:IMR90:Mesenchymal_Stem_Cell:Mesendoderm:Trophoblast-like_Cell:hESC	2.6e-42	rs11882123:rs2285626:rs2285626;rs17216693;19:19510831_AT_A:rs58542926;rs17216693:rs12985293:rs17216693:rs58542926;19:19756073_AGCC_A:19:19756073_AGCC_A:rs117414940	37
ENSG00000213988	ZNF90	19	20188803	20237885	1	protein_coding	7643	ZNF90	1.2241e-07	1.21948	0	0	0	NA	NA	NA	NA	Yes	Fetal_Cortex:Mesenchymal_Stem_Cell:Mesendoderm:hESC	2.6e-42	rs117414940:rs12985293:rs58542926;19:19756073_AGCC_A	37
ENSG00000256229	ZNF486	19	20278037	20311299	1	protein_coding	90649	ZNF486	1.88053e-08	1.70573	0	0	0	NA	NA	NA	NA	Yes	Left_Ventricle:IMR90:Mesenchymal_Stem_Cell:Mesendoderm	2.6e-42	rs12985293:rs58542926;19:19756073_AGCC_A:rs117414940	37
ENSG00000188171	ZNF626	19	20802867	20844402	-1	protein_coding	199777	ZNF626	2.34497e-07	10.771	0	0	0	NA	NA	NA	NA	Yes	IMR90:Mesenchymal_Stem_Cell:Trophoblast-like_Cell	2.6e-42	rs117414940:rs12985293:rs58542926;19:19756073_AGCC_A	37
ENSG00000118620	ZNF430	19	21203426	21242856	1	protein_coding	80264	ZNF430	0.000180791	0.502387	0	0	0	NA	NA	NA	NA	Yes	GM12878:IMR90:Mesenchymal_Stem_Cell	2.6e-42	rs12985293:rs58542926;19:19756073_AGCC_A:rs117414940	37
ENSG00000160352	ZNF714	19	21264965	21308073	1	protein_coding	148206	ZNF714	7.33708e-06	0.728801	0	0	0	NA	NA	NA	NA	Yes	Left_Ventricle:IMR90:Mesenchymal_Stem_Cell	2.6e-42	rs12985293:rs58542926;19:19756073_AGCC_A:rs117414940	37
ENSG00000182141	ZNF708	19	21473962	21512227	-1	protein_coding	7562	ZNF708	4.17756e-09	1.09522	0	0	0	NA	NA	NA	NA	Yes	GM12878:Mesenchymal_Stem_Cell	2.6e-42	rs12985293:rs58542926;19:19756073_AGCC_A:19:19756073_AGCC_A	37
ENSG00000172687	ZNF738	19	21541732	21562104	1	protein_coding	148203	ZNF738	0.106373	NA	0	0	0	NA	NA	NA	NA	Yes	Mesenchymal_Stem_Cell	2.6e-42	rs12985293:rs58542926;19:19756073_AGCC_A:rs117414940	37
ENSG00000196268	ZNF493	19	21579921	21610375	1	protein_coding	284443	ZNF493	3.18649e-08	2.72919	0	0	0	NA	NA	NA	NA	Yes	GM12878:IMR90:Mesenchymal_Stem_Cell	2.6e-42	rs117414940:rs12985293:rs58542926;19:19756073_AGCC_A:19:19756073_AGCC_A	37
ENSG00000269237	CTD-2561J22.3	19	21587961	21674068	1	protein_coding	NA	NA	NA	NA	0	0	0	NA	NA	NA	NA	Yes	GM12878:IMR90:Mesenchymal_Stem_Cell	2.6e-42	rs117414940:rs12985293:rs58542926;19:19756073_AGCC_A:19:19756073_AGCC_A	37
ENSG00000197013	ZNF429	19	21679484	21739072	1	protein_coding	353088	ZNF429	9.71214e-14	-0.12431	0	0	0	NA	NA	NA	NA	Yes	IMR90:Mesenchymal_Stem_Cell	2.6e-42	rs117414940:rs12985293:rs58542926;19:19756073_AGCC_A	37
ENSG00000064547	LPAR2	19	19734477	19739739	-1	protein_coding	9170	LPAR2	0.33727	-0.426143	3	7.254	154	3.80631e-12	1.22846e-27	GTEx/v8/Adipose_Subcutaneous:GTEx/v8/Adipose_Visceral_Omentum:GTEx/v8/Artery_Aorta:GTEx/v8/Artery_Tibial:GTEx/v8/Heart_Atrial_Appendage:GTEx/v8/Heart_Left_Ventricle	+	No	NA	7.6e-42	rs58542926;19:19756073_AGCC_A;rs11882123	37
ENSG00000089639	GMIP	19	19740285	19754476	-1	protein_coding	51291	GMIP	7.29299e-05	-0.277164	2	8.763	0	NA	NA	NA	NA	Yes	EP_correlation_cell_type_oneway	9.1e-37	rs58542926;19:19756073_AGCC_A;rs11882123	37
ENSG00000178093	TSSK6	19	19623227	19626838	-1	protein_coding	83983	TSSK6	0.587551	-1.56843	20	19.09	15	2.83493e-05	3.58402e-05	GTEx/v8/Artery_Tibial	-	Yes	Adult_Cortex	3.8e-35	rs11882123;rs2285626;rs144787624;rs17216693;19:19510831_AT_A;rs11882123:rs2285626	37
ENSG00000186010	NDUFA13	19	19626545	19644285	1	protein_coding	51079	NDUFA13	0.000121027	-0.285092	23	19.09	0	NA	NA	NA	NA	Yes	Adult_Cortex	3.8e-35	rs11882123;rs144787624;rs2285626;rs17216693;19:19510831_AT_A;rs11882123:rs2285626	37
ENSG00000258674	CTC-260F20.3	19	19627036	19646885	1	protein_coding	NA	NA	NA	NA	21	19.09	0	NA	NA	NA	NA	Yes	Adult_Cortex	3.8e-35	rs11882123;rs144787624;rs2285626;rs17216693;19:19510831_AT_A;rs11882123:rs2285626	37
ENSG00000256294	ZNF225	19	44616334	44637027	1	protein_coding	7768	ZNF225	3.36669e-08	0.547354	0	0	0	NA	NA	NA	NA	Yes	IMR90	1.8e-25	rs111784051:rs41290120:rs7412	38
ENSG00000073008	PVR	19	45147098	45166850	1	protein_coding	5817	PVR	5.51101e-07	-0.732917	0	0	0	NA	NA	NA	NA	Yes	IMR90:Mesenchymal_Stem_Cell	1.8e-25	rs190921611:rs12721109:rs57465754:rs111784051:rs7412	38
ENSG00000130204	TOMM40	19	45393826	45406946	1	protein_coding	10452	TOMM40	0.963682	NA	11	25.1	2	4.48241e-05	0.0048747	GTEx/v8/Pancreas	+	Yes	Adult_Cortex:Fetal_Cortex:IMR90:Mesenchymal_Stem_Cell	1.8e-25	rs111784051;rs7412;rs7412:rs190921611:rs57465754:rs34827707:rs12721109	38
ENSG00000130203	APOE	19	45409011	45412650	1	protein_coding	348	APOE	0.0345336	-0.237445	7	25.1	1	4.00707e-05	0.0461303	GTEx/v8/Pancreas	+	Yes	Left_Ventricle:Liver:GM12878:IMR90:Mesenchymal_Stem_Cell:Mesendoderm:Trophoblast-like_Cell:hESC	1.8e-25	rs111784051;rs7412;rs190921611;rs190921611:rs12721109:rs57465754	38
ENSG00000130208	APOC1	19	45417504	45422606	1	protein_coding	341	APOC1	0.0507383	-0.105569	7	25.1	0	NA	NA	NA	NA	Yes	Adult_Cortex:Fetal_Cortex:Left_Ventricle:Liver:GM12878:IMR90:Mesenchymal_Stem_Cell:Mesendoderm:Trophoblast-like_Cell:hESC	1.8e-25	rs7412;rs190921611:rs34827707:rs12721109:rs57465754	38
ENSG00000224916	APOC4-APOC2	19	45445495	45452822	1	protein_coding	100533990	APOC4-APOC2	NA	NA	24	17.4	0	NA	NA	NA	NA	Yes	Left_Ventricle:Liver:GM12878:IMR90:Mesenchymal_Stem_Cell:Mesendoderm:Trophoblast-like_Cell:hESC	1.8e-25	rs190921611;rs12721109;rs111784051:rs7412:rs34827707:rs41290120	38
ENSG00000267467	APOC4	19	45445495	45452820	1	protein_coding	346	APOC4	0.000150692	0.337274	24	17.4	44	4.4607e-14	3.56734e-09	GTEx/v8/Liver	+	Yes	Left_Ventricle:Liver:GM12878:IMR90:Mesenchymal_Stem_Cell:Mesendoderm:Trophoblast-like_Cell:hESC	1.8e-25	rs190921611;rs12721109;rs57465754;rs111784051:rs7412:rs34827707:rs41290120	38
ENSG00000234906	APOC2	19	45449243	45452822	1	protein_coding	344	APOC2	0.0227961	0.388733	24	17.4	50	5.34361e-12	1.21381e-15	GTEx/v8/Adipose_Subcutaneous:GTEx/v8/Heart_Atrial_Appendage:GTEx/v8/Liver:GTEx/v8/Pancreas	+	Yes	Left_Ventricle:Liver:GM12878:IMR90:Mesenchymal_Stem_Cell:Mesendoderm:Trophoblast-like_Cell:hESC	1.8e-25	rs190921611;rs12721109;rs111784051:rs7412:rs34827707:rs41290120	38
ENSG00000267114	CTB-129P6.11	19	45453301	45457264	-1	protein_coding	NA	NA	NA	NA	19	17.4	0	NA	NA	NA	NA	Yes	Adult_Cortex:Fetal_Cortex:Left_Ventricle:Liver:GM12878:IMR90:Mesenchymal_Stem_Cell:Mesendoderm:Trophoblast-like_Cell:hESC	1.8e-25	rs190921611;rs12721109;rs57465754;rs111784051:rs7412:rs34827707:rs190921611:rs57465754:rs41290120	38
ENSG00000104853	CLPTM1	19	45457842	45496599	1	protein_coding	1209	CLPTM1	0.980483	NA	47	17.4	0	NA	NA	NA	NA	Yes	Adult_Cortex:Fetal_Cortex:Left_Ventricle:Liver:GM12878:IMR90:Mesenchymal_Stem_Cell:Mesendoderm:Trophoblast-like_Cell:hESC	1.8e-25	rs190921611;rs57465754;rs111784051:rs7412:rs34827707:rs190921611:rs57465754:rs41290120	38
ENSG00000104859	CLASRP	19	45542298	45574214	1	protein_coding	11129	CLASRP	0.964966	-0.0852025	1	1.868	0	NA	NA	NA	NA	Yes	Adult_Cortex:Fetal_Cortex:GM12878:IMR90:Mesenchymal_Stem_Cell:Mesendoderm:Trophoblast-like_Cell:hESC	1.8e-25	rs34827707;rs111784051:rs7412:rs190921611:rs57465754:rs12721109	38
ENSG00000007255	TRAPPC6A	19	45666186	45681495	-1	protein_coding	79090	TRAPPC6A	0.000705278	-0.133842	1	0.065	0	NA	NA	NA	NA	Yes	Adult_Cortex:Fetal_Cortex	1.8e-25	rs34827707;rs7412:rs190921611:rs57465754:rs34827707	38
ENSG00000189114	BLOC1S3	19	45682003	45685059	1	protein_coding	388552	BLOC1S3	0.0184298	-0.115773	1	0.065	0	NA	NA	NA	NA	Yes	Adult_Cortex:Fetal_Cortex	1.8e-25	rs34827707;rs7412:rs190921611:rs57465754:rs34827707	38
ENSG00000267545	AC005779.2	19	45683080	45705702	1	protein_coding	NA	NA	NA	NA	0	0	0	NA	NA	NA	NA	Yes	Adult_Cortex:Fetal_Cortex	1.8e-25	rs7412:rs190921611:rs57465754:rs34827707	38
ENSG00000181035	SLC25A42	19	19174808	19223697	1	protein_coding	284439	SLC25A42	0.208308	-0.88039	1	0.194	0	NA	NA	NA	NA	Yes	IMR90:Mesenchymal_Stem_Cell:Mesendoderm	1e-14	rs143729015;rs143729015:rs61061000;rs28672836:rs28672836:rs11085253:rs61061000	37
ENSG00000141979	CTD-3222D19.2	19	16589878	16739015	-1	protein_coding	NA	NA	NA	NA	0	0	0	NA	NA	NA	NA	Yes	IMR90	4.2e-13	rs143729015	37
ENSG00000105085	MED26	19	16685718	16739873	-1	protein_coding	9441	MED26	0.94855	NA	0	0	0	NA	NA	NA	NA	Yes	IMR90	4.2e-13	rs143729015	37
ENSG00000105656	ELL	19	18553473	18632937	-1	protein_coding	8178	ELL	0.940941	-0.6356	0	0	0	NA	NA	NA	NA	Yes	Adult_Cortex:Fetal_Cortex:Mesenchymal_Stem_Cell	4.2e-13	rs143729015	37
ENSG00000221983	UBA52	19	18682540	18688360	1	protein_coding	7311	UBA52	0.4468	1.70918	0	0	0	NA	NA	NA	NA	Yes	Fetal_Cortex:Liver:IMR90:Mesenchymal_Stem_Cell:Trophoblast-like_Cell	4.2e-13	rs143729015:rs73001020;rs143729015	37
ENSG00000006016	CRLF1	19	18683030	18718551	-1	protein_coding	9244	CRLF1	0.0268556	NA	0	0	0	NA	NA	NA	NA	Yes	Liver:IMR90:Mesenchymal_Stem_Cell:Trophoblast-like_Cell	4.2e-13	rs143729015:rs73001020;rs143729015	37
ENSG00000006015	C19orf60	19	18699495	18703146	1	protein_coding	55049	C19orf60	0.249879	0.549026	0	0	0	NA	NA	NA	NA	Yes	Fetal_Cortex:Liver:IMR90:Mesenchymal_Stem_Cell:Trophoblast-like_Cell	4.2e-13	rs143729015:rs73001020;rs143729015	37
ENSG00000105696	TMEM59L	19	18718240	18731849	1	protein_coding	25789	TMEM59L	0.0151008	NA	0	0	0	NA	NA	NA	NA	Yes	Liver:IMR90:Mesenchymal_Stem_Cell:Trophoblast-like_Cell	4.2e-13	rs143729015:rs73001020;rs143729015	37
ENSG00000130202	PVRL2	19	45349432	45392485	1	protein_coding	5819	PVRL2	0.531937	-0.314456	8	15.03	0	NA	NA	NA	NA	Yes	Fetal_Cortex:Left_Ventricle:IMR90:Mesenchymal_Stem_Cell	1.2e-12	rs111784051;rs41290120;rs111784051:rs41290120	38
ENSG00000254858	MPV17L2	19	18303992	18307758	1	protein_coding	84769	MPV17L2	1.67296e-07	0.4649	0	0	0	NA	NA	NA	NA	Yes	Fetal_Cortex	6e-12	rs143729015	37
ENSG00000105701	FKBP8	19	18642561	18654887	-1	protein_coding	23770	FKBP8	0.978738	NA	0	0	0	NA	NA	NA	NA	Yes	Adult_Cortex:Fetal_Cortex	6e-12	rs143729015	37
ENSG00000105662	CRTC1	19	18794487	18893004	1	protein_coding	23373	CRTC1	0.980548	-2.58761	0	0	0	NA	NA	NA	NA	Yes	Adult_Cortex:Fetal_Cortex	6e-12	rs143729015	37
ENSG00000142453	CARM1	19	10982189	11033453	1	protein_coding	10498	CARM1	0.999358	NA	0	0	0	NA	NA	NA	NA	Yes	IMR90:Mesenchymal_Stem_Cell	1.3e-11	rs151113958	36
ENSG00000130733	YIPF2	19	11033444	11039357	-1	protein_coding	78992	YIPF2	0.00109917	NA	0	0	0	NA	NA	NA	NA	Yes	IMR90:Mesenchymal_Stem_Cell:hESC	1.3e-11	rs151113958	36
ENSG00000142444	C19orf52	19	11039409	11044211	1	protein_coding	90580	C19orf52	0.00198992	-0.0960337	0	0	0	NA	NA	NA	NA	Yes	IMR90:Mesenchymal_Stem_Cell:hESC	1.3e-11	rs151113958	36
ENSG00000130164	LDLR	19	11200038	11244492	1	protein_coding	3949	LDLR	2.59266e-16	0.415051	45	13.85	0	NA	NA	NA	NA	No	NA	1.3e-11	rs151113958	36
ENSG00000173928	SWSAP1	19	11485361	11487627	1	protein_coding	126074	SWSAP1	0.00013467	-0.594214	0	0	0	NA	NA	NA	NA	Yes	Adult_Cortex:Fetal_Cortex	1.3e-11	rs151113958	36
ENSG00000102575	ACP5	19	11685475	11689823	-1	protein_coding	54	ACP5	0.123568	-0.166465	0	0	0	NA	NA	NA	NA	Yes	Adult_Cortex	1.3e-11	rs151113958	36
ENSG00000131116	ZNF428	19	44111371	44124026	-1	protein_coding	126299	ZNF428	0.720275	-0.650154	0	0	0	NA	NA	NA	NA	Yes	IMR90	1.6e-11	rs190921611:rs12721109:rs57465754	38
ENSG00000105767	CADM4	19	44126520	44143991	-1	protein_coding	199731	CADM4	0.979492	NA	0	0	0	NA	NA	NA	NA	Yes	IMR90	1.6e-11	rs190921611:rs12721109:rs57465754	38
ENSG00000216588	IGSF23	19	45116940	45140081	1	protein_coding	147710	IGSF23	NA	0.573725	0	0	0	NA	NA	NA	NA	Yes	IMR90	1.6e-11	rs190921611:rs12721109:rs57465754	38
ENSG00000186567	CEACAM19	19	45165545	45187631	1	protein_coding	56971	CEACAM19	5.77651e-07	0.414158	0	0	0	NA	NA	NA	NA	Yes	Mesenchymal_Stem_Cell	1.6e-11	rs190921611:rs12721109:rs57465754	38
ENSG00000213892	CEACAM16	19	45202421	45213986	1	protein_coding	388551	CEACAM16	0.0295803	-0.58664	0	0	0	NA	NA	NA	NA	Yes	Spleen:IMR90:Mesenchymal_Stem_Cell	1.6e-11	rs41290120:rs190921611:rs12721109:rs57465754	38
ENSG00000130201	EXOC3L2	19	45715879	45737469	-1	protein_coding	90332	EXOC3L2	0.925564	NA	0	0	0	NA	NA	NA	NA	Yes	IMR90:Mesenchymal_Stem_Cell:Trophoblast-like_Cell	1.6e-11	rs190921611:rs12721109:rs57465754:rs34827707	38
ENSG00000104879	CKM	19	45809672	45826235	-1	protein_coding	1158	CKM	0.00505059	0.0384923	0	0	0	NA	NA	NA	NA	Yes	IMR90:Mesenchymal_Stem_Cell	1.6e-11	rs190921611:rs12721109:rs57465754:rs34827707	38
ENSG00000104892	KLC3	19	45836692	45854778	1	protein_coding	147700	KLC3	3.15849e-06	NA	0	0	0	NA	NA	NA	NA	Yes	IMR90:Mesenchymal_Stem_Cell	1.6e-11	rs190921611:rs12721109:rs57465754:rs34827707	38
ENSG00000268341	L47234.1	19	45842445	45842639	1	protein_coding	NA	NA	NA	NA	0	0	0	NA	NA	NA	NA	Yes	Mesenchymal_Stem_Cell	1.6e-11	rs190921611:rs12721109:rs57465754	38
ENSG00000104884	ERCC2	19	45853095	45874176	-1	protein_coding	2068	ERCC2	3.14163e-13	-0.123245	0	0	0	NA	NA	NA	NA	Yes	Mesenchymal_Stem_Cell	1.6e-11	rs190921611:rs12721109:rs57465754	38
ENSG00000105518	TMEM205	19	11453452	11457194	-1	protein_coding	374882	TMEM205	0.394574	-0.471674	0	0	0	NA	NA	NA	NA	Yes	EP_correlation_cell_type_oneway	6e-11	rs151113958	36
ENSG00000104856	RELB	19	45504688	45541452	1	protein_coding	5971	RELB	0.973563	NA	14	16.15	0	NA	NA	NA	NA	No	NA	1.6e-10	rs190921611;rs57465754;rs34827707	38
ENSG00000125746	EML2	19	46110252	46148887	-1	protein_coding	24139	EML2	7.57699e-10	0.190257	0	0	0	NA	NA	NA	NA	Yes	Promoter_anchored_loops:Adult_Cortex:Fetal_Cortex	1.6e-10	rs190921611:rs57465754:rs34827707	38
ENSG00000267757	C19orf83	19	46144752	46146098	1	protein_coding	100287177	C19orf83	NA	NA	0	0	0	NA	NA	NA	NA	Yes	Promoter_anchored_loops:Adult_Cortex:Fetal_Cortex	1.6e-10	rs190921611:rs57465754:rs34827707	38
ENSG00000130511	SSBP4	19	18529674	18545372	1	protein_coding	170463	SSBP4	0.961659	NA	0	0	0	NA	NA	NA	NA	Yes	Promoter_anchored_loops	5.4e-10	rs143729015	37
ENSG00000105650	PDE4C	19	18318771	18366229	-1	protein_coding	5143	PDE4C	4.88575e-05	0.288882	0	0	0	NA	NA	NA	NA	Yes	Promoter_anchored_loops	8e-10	rs143729015	37
ENSG00000187244	BCAM	19	45312328	45324673	1	protein_coding	4059	BCAM	0.0368512	NA	1	9.825	0	NA	NA	NA	NA	No	NA	1.8e-09	rs41290120	38
ENSG00000256771	ZNF253	19	19976695	20005483	1	protein_coding	56242	ZNF253	1.33296e-06	0.279041	0	0	0	NA	NA	NA	NA	Yes	Adult_Cortex:Fetal_Cortex:Left_Ventricle:Mesenchymal_Stem_Cell:Mesendoderm:Trophoblast-like_Cell:hESC	5.5e-09	rs117414940	37
ENSG00000237440	ZNF737	19	20718631	20748615	-1	protein_coding	100129842	ZNF737	1.10579e-07	1.35563	0	0	0	NA	NA	NA	NA	Yes	Fetal_Cortex:IMR90:Mesenchymal_Stem_Cell:Mesendoderm:hESC	5.5e-09	rs117414940	37
ENSG00000160229	ZNF66	19	20959110	20991922	1	protein_coding	7617	ZNF66	5.45295e-17	NA	0	0	0	NA	NA	NA	NA	Yes	IMR90:Mesenchymal_Stem_Cell:Mesendoderm	5.5e-09	rs117414940	37
ENSG00000197020	ZNF100	19	21905568	21950430	-1	protein_coding	163227	ZNF100	7.10189e-13	1.45453	0	0	0	NA	NA	NA	NA	Yes	IMR90:Mesenchymal_Stem_Cell	5.5e-09	rs117414940	37
ENSG00000160321	ZNF208	19	22115760	22193751	-1	protein_coding	7757	ZNF208	5.00161e-20	-0.0874899	0	0	0	NA	NA	NA	NA	Yes	IMR90:Mesenchymal_Stem_Cell	5.5e-09	rs117414940	37
ENSG00000196109	ZNF676	19	22361893	22379753	-1	protein_coding	163223	ZNF676	1.68698e-06	0.244027	0	0	0	NA	NA	NA	NA	Yes	Mesenchymal_Stem_Cell	5.5e-09	rs117414940	37
ENSG00000167378	IRGQ	19	44088521	44100287	-1	protein_coding	126298	IRGQ	0.00119723	-1.83646	0	0	0	NA	NA	NA	NA	Yes	Adult_Cortex:Fetal_Cortex	1.6e-08	rs34827707:rs190921611	38
ENSG00000124444	ZNF576	19	44100544	44105309	1	protein_coding	79177	ZNF576	0.00754575	-1.08557	0	0	0	NA	NA	NA	NA	Yes	Adult_Cortex:Fetal_Cortex	1.6e-08	rs34827707:rs190921611	38
ENSG00000226763	SRRM5	19	44100769	44118649	1	protein_coding	100170229	SRRM5	7.19142e-06	-0.661941	0	0	0	NA	NA	NA	NA	Yes	Adult_Cortex:Fetal_Cortex	1.6e-08	rs34827707:rs190921611	38
ENSG00000159882	ZNF230	19	44507100	44518078	1	protein_coding	7773	ZNF230	0.00834108	1.8805	0	0	0	NA	NA	NA	NA	Yes	Fetal_Cortex	1.6e-08	rs34827707	38
ENSG00000142273	CBLC	19	45281126	45303891	1	protein_coding	23624	CBLC	0.00018299	-0.348046	0	0	0	NA	NA	NA	NA	Yes	Fetal_Cortex	1.6e-08	rs34827707	38
ENSG00000170684	ZNF296	19	45574758	45579846	-1	protein_coding	162979	ZNF296	0.973289	NA	0	0	0	NA	NA	NA	NA	Yes	Adult_Cortex:Fetal_Cortex	1.6e-08	rs34827707	38
ENSG00000104866	PPP1R37	19	45594654	45651335	1	protein_coding	284352	PPP1R37	NA	0.14395	1	7.261	0	NA	NA	NA	NA	Yes	Adult_Cortex:Fetal_Cortex	1.6e-08	rs12721109;rs34827707	38
ENSG00000125740	FOSB	19	45971253	45978437	1	protein_coding	2354	FOSB	0.852916	-1.20539	0	0	0	NA	NA	NA	NA	Yes	Adult_Cortex:Fetal_Cortex	1.6e-08	rs34827707	38
ENSG00000125743	SNRPD2	19	46190712	46195827	-1	protein_coding	6633	SNRPD2	0.747515	-0.475801	0	0	0	NA	NA	NA	NA	Yes	Adult_Cortex:Fetal_Cortex	1.6e-08	rs34827707	38
ENSG00000011478	QPCTL	19	46195741	46207247	1	protein_coding	54814	QPCTL	0.00026154	-0.638079	0	0	0	NA	NA	NA	NA	Yes	Adult_Cortex:Fetal_Cortex	1.6e-08	rs34827707	38
ENSG00000177051	FBXO46	19	46213887	46234162	-1	protein_coding	23403	FBXO46	0.876437	0.0905437	0	0	0	NA	NA	NA	NA	Yes	Fetal_Cortex	1.6e-08	rs34827707	38
ENSG00000237452	AC074212.3	19	46236509	46267792	1	protein_coding	388553	BHMG1	0.376321	NA	0	0	0	NA	NA	NA	NA	Yes	Fetal_Cortex	1.6e-08	rs34827707	38
ENSG00000125755	SYMPK	19	46318668	46366548	-1	protein_coding	8189	SYMPK	0.997278	-0.38464	0	0	0	NA	NA	NA	NA	Yes	Fetal_Cortex	1.6e-08	rs34827707	38
ENSG00000170608	FOXA3	19	46367247	46377055	1	protein_coding	3171	FOXA3	0.39551	-0.452954	0	0	0	NA	NA	NA	NA	Yes	Fetal_Cortex	1.6e-08	rs34827707	38
ENSG00000230510	PPP5D1	19	46984053	47104457	-1	protein_coding	100506012	PPP5D1	0.039345	NA	0	0	0	NA	NA	NA	NA	Yes	Fetal_Cortex	1.6e-08	rs34827707	38
ENSG00000268423	AC011551.3	19	47050313	47104118	-1	protein_coding	NA	NA	NA	NA	0	0	0	NA	NA	NA	NA	Yes	Fetal_Cortex	1.6e-08	rs34827707	38
ENSG00000160014	CALM3	19	47104331	47114050	1	protein_coding	808	CALM3	0.580172	NA	0	0	0	NA	NA	NA	NA	Yes	Fetal_Cortex	1.6e-08	rs34827707	38
ENSG00000090372	STRN4	19	47222764	47250251	-1	protein_coding	29888	STRN4	0.999575	-0.598775	0	0	0	NA	NA	NA	NA	Yes	Adult_Cortex	1.6e-08	rs34827707	38
ENSG00000130158	DOCK6	19	11309971	11373157	-1	protein_coding	57572	DOCK6	2.8309e-19	NA	11	23.1	1	0.000159023	0.0160196	GTEx/v8/Artery_Tibial	+	No	NA	2.6e-08	rs2278426	36
ENSG00000130173	C19orf80	19	11348178	11352619	1	protein_coding	55908	C19orf80	2.61107e-06	-0.0192281	5	23.1	0	NA	NA	NA	NA	No	NA	2.6e-08	rs2278426	36
ENSG00000266958	AC006126.3	19	45690646	45720191	1	protein_coding	NA	NA	NA	NA	0	0	0	NA	NA	NA	NA	Yes	Promoter_anchored_loops	1.5e-07	rs190921611	38
ENSG00000129353	SLC44A2	19	10713133	10755235	1	protein_coding	57153	SLC44A2	0.0414646	-0.378861	0	0	2	2.77111e-05	0.000289454	GTEx/v8/Artery_Tibial	+	No	NA	1.4e-05	rs151113958	36
ENSG00000196757	ZNF700	19	12035883	12061588	1	protein_coding	90592	ZNF700	4.39166e-11	0.364854	0	0	3	4.47579e-05	0.00303929	GTEx/v8/Artery_Tibial	-	No	NA	3.4e-05	rs2278426	36
ENSG00000007047	MARK4	19	45582546	45808541	1	protein_coding	57787	MARK4	0.999932	NA	2	7.261	0	NA	NA	NA	NA	No	NA	0.00061	rs12721109;rs34827707	38
ENSG00000179846	NKPD1	19	45653008	45663408	-1	protein_coding	284353	NKPD1	1.88742e-09	NA	2	7.261	0	NA	NA	NA	NA	No	NA	0.00061	rs12721109;rs34827707	38

## Sheet: ST4B
ensg	symbol	chr	start	end	strand	type	entrezID	HUGO	pLI	ncRVIS	posMapSNPs	posMapMaxCADD	eqtlMapSNPs	eqtlMapminP	eqtlMapminQ	eqtlMapts	eqtlDirection	ciMap	ciMapts	minGwasP	IndSigSNPs	GenomicLocus
ENSG00000162585	C1orf86	1	2115903	2144159	-1	protein_coding	199990	C1orf86	0.785171	NA	0	0	0	NA	NA	NA	NA	Yes	Adult_Cortex:Fetal_Cortex:Spleen:IMR90:Mesenchymal_Stem_Cell:Mesendoderm:Trophoblast-like_Cell:hESC	1.8e-08	rs6693447	1
ENSG00000269554	AL590822.2	1	2121237	2123179	1	protein_coding	NA	NA	NA	NA	0	0	0	NA	NA	NA	NA	Yes	Promoter_anchored_loops:Adult_Cortex:Fetal_Cortex:Spleen:IMR90:Mesenchymal_Stem_Cell:Mesendoderm:Trophoblast-like_Cell:hESC	1.8e-08	rs6693447	1
ENSG00000203301	AL590822.1	1	2143360	2145620	-1	protein_coding	NA	NA	NA	NA	0	0	0	NA	NA	NA	NA	Yes	Adult_Cortex:Fetal_Cortex:Spleen:IMR90:Mesenchymal_Stem_Cell:Mesendoderm:Trophoblast-like_Cell:hESC	1.8e-08	rs6693447	1
ENSG00000157933	SKI	1	2160134	2241558	1	protein_coding	6497	SKI	0.981402	NA	0	0	0	NA	NA	NA	NA	Yes	Promoter_anchored_loops:Adult_Cortex:Fetal_Cortex:Spleen:IMR90:Mesenchymal_Stem_Cell:Mesendoderm:Trophoblast-like_Cell:hESC	1.8e-08	rs6693447	1
ENSG00000116151	MORN1	1	2252692	2323146	-1	protein_coding	79906	MORN1	7.87931e-07	NA	7	5.012	0	NA	NA	NA	NA	No	NA	1.8e-08	rs6693447	1
ENSG00000269753	AL589739.1	1	2258581	2259042	1	protein_coding	NA	NA	NA	NA	0	0	0	NA	NA	NA	NA	Yes	Adult_Cortex	1.9e-08	rs6693447	1
ENSG00000157916	RER1	1	2323267	2336883	1	protein_coding	11079	RER1	0.96924	-0.558231	10	5.341	0	NA	NA	NA	NA	No	NA	1.8e-08	rs6693447	1
ENSG00000157911	PEX10	1	2336236	2345236	-1	protein_coding	5192	PEX10	0.0104636	-0.228252	9	5.341	1	6.97114e-05	1.74245e-13	GTEx/v8/Adipose_Subcutaneous	-	No	NA	1.8e-08	rs6693447	1
ENSG00000149527	PLCH2	1	2357419	2436969	1	protein_coding	9651	PLCH2	1.70519e-08	NA	0	0	0	NA	NA	NA	NA	Yes	Adult_Cortex:Fetal_Cortex	1.8e-08	rs6693447	1
ENSG00000157881	PANK4	1	2439972	2458039	-1	protein_coding	55229	PANK4	0.945333	NA	0	0	0	NA	NA	NA	NA	Yes	Promoter_anchored_loops:Adult_Cortex:Fetal_Cortex	1.8e-08	rs6693447	1
ENSG00000157873	TNFRSF14	1	2487078	2496821	1	protein_coding	8764	TNFRSF14	0.819999	-0.131268	0	0	0	NA	NA	NA	NA	Yes	Promoter_anchored_loops	1.8e-08	rs6693447	1
ENSG00000215912	TTC34	1	2567415	2718286	-1	protein_coding	100287898	TTC34	NA	NA	0	0	0	NA	NA	NA	NA	Yes	Promoter_anchored_loops	1.8e-08	rs6693447	1
ENSG00000142611	PRDM16	1	2985732	3355185	1	protein_coding	63976	PRDM16	0.999843	1.53566	0	0	0	NA	NA	NA	NA	Yes	Fetal_Cortex	1.9e-08	rs6693447	1
ENSG00000130762	ARHGEF16	1	3370990	3397677	1	protein_coding	27237	ARHGEF16	9.36505e-08	NA	0	0	0	NA	NA	NA	NA	Yes	IMR90:Mesenchymal_Stem_Cell	1.8e-08	rs6693447	1
ENSG00000162591	MEGF6	1	3406484	3528059	-1	protein_coding	1953	MEGF6	4.42421e-15	NA	0	0	0	NA	NA	NA	NA	Yes	IMR90:Mesenchymal_Stem_Cell	1.8e-08	rs6693447	1
ENSG00000158109	TPRG1L	1	3541566	3546691	1	protein_coding	127262	TPRG1L	0.00284528	0.358352	0	0	0	NA	NA	NA	NA	Yes	IMR90:Mesenchymal_Stem_Cell	1.8e-08	rs6693447	1
ENSG00000116213	WRAP73	1	3547331	3569325	-1	protein_coding	49856	WRAP73	0.026922	-0.367755	0	0	0	NA	NA	NA	NA	Yes	IMR90	1.8e-08	rs6693447	1
ENSG00000078900	TP73	1	3569084	3652765	1	protein_coding	7161	TP73	0.975978	1.36162	0	0	0	NA	NA	NA	NA	Yes	IMR90	1.8e-08	rs6693447	1
ENSG00000116209	TMEM59	1	54497347	54519177	-1	protein_coding	9528	TMEM59	2.23025e-07	0.206649	0	0	1	2.03947e-05	0.00196452	GTEx/v8/Artery_Aorta	+	No	NA	2.6e-09	rs11591147	2
ENSG00000169174	PCSK9	1	55505221	55530525	1	protein_coding	255738	PCSK9	1.02508e-10	0.264271	1	15.41	0	NA	NA	NA	NA	No	NA	2.6e-09	rs11591147	2
ENSG00000134709	HOOK1	1	60280458	60342050	1	protein_coding	51361	HOOK1	4.1567e-05	-0.0627975	0	0	0	NA	NA	NA	NA	Yes	Left_Ventricle:Mesenchymal_Stem_Cell	3e-63	rs1167998;rs371562288:rs1183851;rs1168100:rs912540;rs536629310:rs1167998;rs11208009;rs371562288:rs11207998:rs76272805:rs746077597:rs1167998:rs116665700:rs373836691:rs1183851	3
ENSG00000134716	CYP2J2	1	60358980	60392462	-1	protein_coding	1573	CYP2J2	4.51202e-12	0.320328	0	0	0	NA	NA	NA	NA	Yes	Mesenchymal_Stem_Cell	1e-10	rs6587970:rs35837000:rs76272805:rs6587973	3
ENSG00000162599	NFIA	1	61330931	61928465	1	protein_coding	4774	NFIA	0.999555	-0.180372	0	0	0	NA	NA	NA	NA	Yes	IMR90:Mesenchymal_Stem_Cell	9.3e-12	rs6587973:rs371337535:rs72929768:rs2780874:rs116665700	3
ENSG00000132854	KANK4	1	62702651	62785085	-1	protein_coding	163782	KANK4	5.3985e-08	-0.458434	0	0	0	NA	NA	NA	NA	Yes	Mesendoderm:Trophoblast-like_Cell:hESC	9.3e-12	rs6587970:rs35837000:rs76272805:rs6587973:rs371337535:rs72929768	3
ENSG00000162607	USP1	1	62901968	62917475	1	protein_coding	7398	USP1	0.993181	-1.54208	54	18.26	8	1.97043e-07	0.000432786	GTEx/v8/Adipose_Subcutaneous:GTEx/v8/Artery_Tibial	+	Yes	Promoter_anchored_loops:IMR90:Mesenchymal_Stem_Cell:Mesendoderm:Trophoblast-like_Cell:hESC	3e-63	rs11207998;rs1167998;rs11208009;rs371562288;rs1183851;rs746077597;rs912540;rs536629310;rs1168100;rs2149116;rs11208014:rs6688417;rs7512480;rs12564421:rs1167998;rs371562288:rs1167998:rs912540;rs536629310:rs11207998:rs1167998;rs371562288:rs116665700:rs746077597:rs373836691:rs1183851:rs1183851;rs1168100:rs76272805:rs1167998;rs11208009:rs374131620:rs1183851;rs2149116:1:63185902_CT_C:rs11208009:1:63190…	3
ENSG00000116641	DOCK7	1	62920399	63153969	-1	protein_coding	85440	DOCK7	0.771361	NA	315	18.64	542	1.09201e-20	9.93875e-16	GTEx/v8/Adipose_Subcutaneous:GTEx/v8/Adipose_Visceral_Omentum:GTEx/v8/Artery_Aorta:GTEx/v8/Artery_Tibial:GTEx/v8/Heart_Atrial_Appendage:GTEx/v8/Heart_Left_Ventricle	+	Yes	Adult_Cortex:IMR90:Mesenchymal_Stem_Cell:Mesendoderm	3e-63	rs1167998;rs11208009;rs371562288;rs746077597;rs912540;rs536629310;rs11207998;rs116665700;rs373836691;rs1183851;rs55853774;rs17381383;rs370129568;rs1168100;rs76272805;1:63045366_GA_G;1:63130453_TA_T;1:63131385_CAA_C;1:63134595_CA_C;1:63149883_TA_T;rs72929768;rs2149116;rs11208014;rs11809792;rs12129277;rs6688417;rs12564421;rs7512480;1:63190449_GTTTTTTTT_G:rs912540:rs11208009:rs2149116:rs1167998;rs37…	3
ENSG00000132855	ANGPTL3	1	63063158	63071830	1	protein_coding	27329	ANGPTL3	2.12016e-07	-0.803837	16	12.12	15	1.13102e-05	0.0421505	GTEx/v8/Liver	+	Yes	Left_Ventricle:Liver:IMR90:Mesenchymal_Stem_Cell:Mesendoderm:Trophoblast-like_Cell:hESC	3e-63	rs11207998;rs1167998;rs371562288;rs11208009;rs371562288:rs1167998:rs912540;rs536629310:rs11207998:rs1167998;rs371562288:rs116665700:rs746077597:rs373836691:rs1183851:rs1183851;rs1168100:rs76272805:rs1167998;rs11208009:rs374131620:rs1183851;rs1168100;rs2149116:1:63185902_CT_C:rs11208009:1:63190449_GTTTTTTTT_G:rs912540:rs2149116:rs370129568:rs371562288:rs536629310:rs17381383:rs1168100:rs55853774:1:…	3
ENSG00000269624	AL138847.1	1	63073437	63075249	1	protein_coding	NA	NA	NA	NA	11	12.12	0	NA	NA	NA	NA	Yes	Left_Ventricle:Liver:IMR90:Mesenchymal_Stem_Cell:Mesendoderm:Trophoblast-like_Cell:hESC	3e-63	rs1167998;rs371562288;rs1183851;rs1168100;rs11208009;rs371562288:rs1167998:rs912540;rs536629310:rs11207998:rs1167998;rs371562288:rs116665700:rs746077597:rs373836691:rs1183851:rs1183851;rs1168100:rs76272805:rs1167998;rs11208009:rs374131620:rs1183851;rs2149116:1:63185902_CT_C:rs11208009:1:63190449_GTTTTTTTT_G:rs912540:rs2149116:rs370129568:rs371562288:rs536629310:rs17381383:rs1168100:rs55853774:1:6…	3
ENSG00000125703	ATG4C	1	63249806	63331184	1	protein_coding	84938	ATG4C	3.32762e-09	-0.809377	165	17.7	150	6.89586e-06	0.00836476	GTEx/v8/Artery_Tibial:GTEx/v8/Heart_Left_Ventricle	-	Yes	Promoter_anchored_loops:Liver:GM12878:IMR90:Mesenchymal_Stem_Cell:Mesendoderm:hESC	3e-63	rs11208014;rs6688417;rs7512480;rs12564421;1:63268136_TA_T;rs11809792;rs12129277;rs116665700;rs1167998:rs1167998;rs11208009;rs371562288:rs1183851:rs1167998;rs371562288:rs746077597:rs912540;rs536629310:rs11207998:rs116665700:rs373836691:rs72929768:rs1167998;rs11208009:rs370129568:rs371562288:rs536629310:rs17381383:rs1168100:rs76272805:1:63045366_GA_G:rs1183851;rs1168100:rs2780874:rs55853774:rs912540	3
ENSG00000187140	FOXD3	1	63788730	63790797	1	protein_coding	27022	FOXD3	NA	-0.433106	0	0	0	NA	NA	NA	NA	Yes	IMR90	3.4e-08	rs2780874:rs116665700	3
ENSG00000088035	ALG6	1	63833261	63904233	1	protein_coding	29929	ALG6	0.0553676	-0.307103	0	0	0	NA	NA	NA	NA	Yes	IMR90:Mesenchymal_Stem_Cell:Mesendoderm:hESC	4.4e-18	rs2780874:rs116665700:rs6688417;rs7512480;rs12564421:rs11809792:rs11208014:rs6688417:rs12564421:rs7512480	3
ENSG00000142856	ITGB3BP	1	63906441	64059392	-1	protein_coding	23421	ITGB3BP	1.47054e-05	-0.391813	0	0	0	NA	NA	NA	NA	Yes	Mesendoderm:hESC	3.4e-08	rs2780874:rs116665700	3
ENSG00000203965	EFCAB7	1	63989043	64038364	1	protein_coding	84455	EFCAB7	1.67072e-12	-0.503488	0	0	0	NA	NA	NA	NA	Yes	Left_Ventricle:Liver:IMR90:Mesenchymal_Stem_Cell:Mesendoderm:Neural_Progenitor_Cell:Trophoblast-like_Cell:hESC	3e-63	rs2780874:rs116665700:rs6587973:rs371337535:rs72929768:rs11207998:rs1167998:rs1167998;rs11208009;rs371562288:rs1183851:rs1167998;rs371562288:rs746077597:rs1167998;rs11208009:rs912540;rs536629310:rs373836691:rs6688417;rs7512480;rs12564421:rs11809792:rs11208014:rs12129277:rs6688417;rs12564421:rs6688417;rs11208014;rs12564421:rs6688417:rs12564421:rs7512480:rs76272805:1:63045366_GA_G:rs374131620:rs118…	3
ENSG00000116652	DLEU2L	1	64014588	64015405	1	protein_coding	79469	DLEU2L	NA	NA	0	0	0	NA	NA	NA	NA	Yes	Left_Ventricle:Liver:IMR90:Mesenchymal_Stem_Cell:Mesendoderm:Trophoblast-like_Cell:hESC	3e-63	rs1167998;rs11208009;rs371562288:rs1167998:rs912540;rs536629310:rs11207998:rs1167998;rs371562288:rs116665700:rs746077597:rs373836691:rs1183851:rs6688417;rs7512480;rs12564421:rs11809792:rs11208014:rs6688417:rs12564421:rs7512480:rs2780874:rs12129277:rs6688417;rs12564421:rs6688417;rs11208014;rs12564421:1:63268136_TA_T:rs370129568:rs371562288:rs536629310:rs17381383:rs1168100:rs1183851;rs1168100:rs762…	3
ENSG00000079739	PGM1	1	64058947	64125916	1	protein_coding	5236	PGM1	9.9614e-06	1.20318	0	0	0	NA	NA	NA	NA	Yes	Mesendoderm:hESC	3.4e-08	rs2780874:rs116665700	3
ENSG00000158966	CACHD1	1	64936428	65158741	1	protein_coding	57685	CACHD1	0.838037	0.0563902	0	0	0	NA	NA	NA	NA	Yes	IMR90	3.4e-08	rs2780874:rs116665700	3
ENSG00000162437	RAVER2	1	65210778	65298915	1	protein_coding	55225	RAVER2	1.85996e-06	-0.746777	0	0	0	NA	NA	NA	NA	Yes	Left_Ventricle:IMR90:Mesenchymal_Stem_Cell:Mesendoderm:Trophoblast-like_Cell:hESC	3.2e-63	rs1167998;rs371562288:rs11207998:rs116665700:rs370129568:rs1167998:rs371562288:rs536629310:rs17381383:rs746077597:rs1168100:rs912540;rs536629310:rs6587973:rs371337535:rs72929768:rs6688417;rs7512480;rs12564421:rs11809792:rs11208014:rs6688417:rs12564421:rs7512480:rs2780874:rs76272805:1:63045366_GA_G:rs1167998;rs11208009:rs374131620:rs1183851;rs1168100;rs2149116:1:63185902_CT_C:rs11208009:1:63190449…	3
ENSG00000116675	DNAJC6	1	65713902	65881552	1	protein_coding	9829	DNAJC6	0.999188	-0.584518	0	0	0	NA	NA	NA	NA	Yes	Mesenchymal_Stem_Cell	3.4e-08	rs2780874:rs116665700	3
ENSG00000121957	GPSM2	1	109417972	109477167	1	protein_coding	29899	GPSM2	2.9413e-10	0.141118	0	0	0	NA	NA	NA	NA	Yes	EP_correlation_organ_oneway	2.2e-07	rs6657811	4
ENSG00000085433	WDR47	1	109512836	109584850	-1	protein_coding	22911	WDR47	0.905662	-0.351231	0	0	0	NA	NA	NA	NA	Yes	EP_correlation_cell_type_oneway:EP_correlation_organ_oneway	2.2e-07	rs6657811	4
ENSG00000179902	C1orf194	1	109648573	109656479	-1	protein_coding	127003	C1orf194	2.5003e-07	NA	0	0	0	NA	NA	NA	NA	Yes	EP_correlation_cell_type_oneway:EP_correlation_organ_oneway	2.2e-07	rs6657811	4
ENSG00000116299	KIAA1324	1	109656301	109749401	1	protein_coding	57535	KIAA1324	2.14865e-08	NA	0	0	0	NA	NA	NA	NA	Yes	EP_correlation_cell_type_oneway:EP_correlation_organ_oneway	2.2e-07	rs6657811	4
ENSG00000031698	SARS	1	109756540	109780791	1	protein_coding	6301	SARS	0.999151	-0.332038	0	0	0	NA	NA	NA	NA	Yes	Fetal_Cortex	1.4e-14	rs629301:rs629301;rs4970834	4
ENSG00000143126	CELSR2	1	109792641	109818372	1	protein_coding	1952	CELSR2	0.999999	0.807304	17	18.47	16	9.42742e-34	2.20583e-27	GTEx/v8/Liver:GTEx/v8/Pancreas	-	Yes	Promoter_anchored_loops:Spleen	4.5e-15	rs6657811;rs4970834;rs629301;rs629301:rs629301;rs4970834:rs6657811:rs4970834	4
ENSG00000134222	PSRC1	1	109822178	109825808	-1	protein_coding	84722	PSRC1	1.74718e-06	-0.20888	13	18.47	16	1.0541e-37	1.834e-30	GTEx/v8/Adipose_Subcutaneous:GTEx/v8/Adipose_Visceral_Omentum:GTEx/v8/Artery_Aorta:GTEx/v8/Artery_Tibial:GTEx/v8/Heart_Left_Ventricle:GTEx/v8/Liver:GTEx/v8/Pancreas	-	No	NA	4.5e-15	rs4970834;rs629301;rs6657811	4
ENSG00000221986	MYBPHL	1	109834987	109849663	-1	protein_coding	343263	MYBPHL	0.00461844	0.281706	0	0	0	NA	NA	NA	NA	Yes	EP_links_oneway	2.2e-07	rs6657811	4
ENSG00000134243	SORT1	1	109852192	109940573	-1	protein_coding	6272	SORT1	0.999927	-1.34619	0	0	16	3.08634e-54	3.21918e-45	GTEx/v8/Liver	-	Yes	Promoter_anchored_loops:Adult_Cortex:Fetal_Cortex:Spleen:GM12878:IMR90:Mesenchymal_Stem_Cell:Mesendoderm:Trophoblast-like_Cell:hESC	4.5e-15	rs6657811;rs4970834;rs629301;rs6657811:rs629301:rs629301;rs4970834:rs4970834	4
ENSG00000143028	SYPL2	1	110009180	110024759	1	protein_coding	284612	SYPL2	0.0167711	0.437866	0	0	14	5.67264e-10	1.41445e-54	GTEx/v8/Artery_Aorta:GTEx/v8/Artery_Coronary:GTEx/v8/Artery_Tibial:GTEx/v8/Heart_Atrial_Appendage:GTEx/v8/Liver	+	Yes	IMR90:Mesenchymal_Stem_Cell	4.5e-15	rs6657811;rs4970834;rs629301;rs6657811:rs4970834:rs629301;rs4970834:rs629301	4
ENSG00000162650	ATXN7L2	1	110026101	110035426	1	protein_coding	127002	ATXN7L2	0.718955	NA	0	0	10	5.83014e-07	6.65426e-17	GTEx/v8/Liver	-	Yes	IMR90:Mesenchymal_Stem_Cell	4.5e-15	rs629301;rs4970834;rs6657811:rs4970834:rs629301;rs4970834:rs629301	4
ENSG00000174151	CYB561D1	1	110036674	110045554	1	protein_coding	284613	CYB561D1	0.0158304	-0.395994	0	0	0	NA	NA	NA	NA	Yes	IMR90:Mesenchymal_Stem_Cell	4.5e-15	rs6657811:rs4970834:rs629301;rs4970834:rs629301	4
ENSG00000181754	AMIGO1	1	110046797	110052360	-1	protein_coding	57463	AMIGO1	0.888493	-0.212526	0	0	0	NA	NA	NA	NA	Yes	Promoter_anchored_loops:EP_correlation_cell_type_oneway	4e-10	rs6657811	4
ENSG00000156097	GPR61	1	110082494	110091028	1	protein_coding	83873	GPR61	0.801489	-0.58687	0	0	0	NA	NA	NA	NA	Yes	Promoter_anchored_loops	4e-10	rs6657811	4
ENSG00000240857	RDH14	2	18735989	18741946	-1	protein_coding	57665	RDH14	0.232943	-0.659488	0	0	0	NA	NA	NA	NA	Yes	IMR90:hESC	4.7e-17	rs10184054:rs62122481:rs952275:rs533617	5
ENSG00000068697	LAPTM4A	2	20232411	20251789	-1	protein_coding	9741	LAPTM4A	0.503802	0.0942831	0	0	0	NA	NA	NA	NA	Yes	Promoter_anchored_loops	8.4e-12	rs4075673:rs10184054;rs4296389:rs533617	5
ENSG00000055917	PUM2	2	20448452	20551995	-1	protein_coding	23369	PUM2	0.999923	-1.03263	0	0	0	NA	NA	NA	NA	Yes	Mesendoderm	4.7e-17	rs10184054:rs62122481:rs952275:rs533617	5
ENSG00000143878	RHOB	2	20646835	20649200	1	protein_coding	388	RHOB	0.245031	-0.338453	0	0	0	NA	NA	NA	NA	Yes	Trophoblast-like_Cell	4.7e-17	rs10184054:rs62122481:rs952275:rs533617	5
ENSG00000118960	HS1BP3	2	20760208	20850849	-1	protein_coding	64342	HS1BP3	0.000353325	2.11433	0	0	0	NA	NA	NA	NA	Yes	Promoter_anchored_loops:Liver:GM12878:IMR90:Mesenchymal_Stem_Cell:Mesendoderm:Trophoblast-like_Cell:hESC	4e-18	rs10184054:rs62122481:rs952275:rs533617:rs10184054;rs4296389:rs4075673:rs4296389:rs1800481:rs668948;rs1800481:rs60403635:rs668948:rs34468875:rs668948;rs34601365;rs432483:rs12618122:rs668948;rs432483:rs34601365:rs368220458:rs4635554	5
ENSG00000143869	GDF7	2	20866424	20873418	1	protein_coding	151449	GDF7	0.778067	0.171954	0	0	0	NA	NA	NA	NA	Yes	Promoter_anchored_loops:Liver:GM12878:IMR90:Mesenchymal_Stem_Cell:Mesendoderm:Trophoblast-like_Cell:hESC	4e-18	rs10184054:rs62122481:rs952275:rs533617:rs10184054;rs4296389:rs4075673:rs4296389:rs1800481:rs668948;rs1800481:rs60403635:rs668948:rs34468875:rs668948;rs34601365;rs432483:rs12618122:rs668948;rs432483:rs34601365:rs368220458:rs4635554	5
ENSG00000118961	C2orf43	2	20883788	21022882	-1	protein_coding	60526	C2orf43	0.000647485	-0.605069	0	0	27	8.16419e-06	1.70489e-23	GTEx/v8/Adipose_Visceral_Omentum	+	Yes	Left_Ventricle:Liver:IMR90:Mesenchymal_Stem_Cell:Mesendoderm:Trophoblast-like_Cell:hESC	4e-18	rs952275;rs34468875;rs10184054:rs62122481:rs952275:rs533617:rs10184054;rs4296389:rs4075673:rs4296389:rs668948;rs1800481:rs668948:rs60403635:rs34468875:rs668948;rs34601365;rs432483:rs1800481:rs12618122:rs668948;rs432483:rs34601365:rs368220458:rs4635554	5
ENSG00000084674	APOB	2	21224301	21266945	-1	protein_coding	338	APOB	5.49085e-16	-0.346892	30	24.9	320	3.56067e-26	1.88901e-24	GTEx/v8/Adipose_Subcutaneous:GTEx/v8/Artery_Tibial:GTEx/v8/Heart_Atrial_Appendage:GTEx/v8/Heart_Left_Ventricle	-	Yes	Liver:IMR90:Mesenchymal_Stem_Cell:Mesendoderm:Trophoblast-like_Cell:hESC	4e-18	rs62122481;rs952275;rs10184054;rs533617;rs1800481;rs668948;rs60403635;rs4296389;rs4075673;rs34468875;rs4635554;rs34601365;rs432483;rs12618122;rs1848922;rs10184054:rs62122481:rs952275:rs533617:rs668948;rs1800481:rs668948:rs60403635:rs34468875:rs668948;rs432483:rs12618122:rs668948;rs432483:rs34601365:rs368220458:rs4635554	5
ENSG00000218819	TDRD15	2	21346789	21366144	1	protein_coding	100129278	TDRD15	NA	NA	25	10.66	13	1.23348e-07	4.5811e-10	GTEx/v8/Liver	-	Yes	Left_Ventricle:Liver:Mesenchymal_Stem_Cell:Mesendoderm:Trophoblast-like_Cell:hESC	4e-18	rs668948;rs34601365;rs432483;rs34468875;rs12618122;rs1800481:rs668948:rs60403635:rs34468875:rs668948;rs432483:rs34601365:rs12618122:rs368220458:rs4635554:rs10184054:rs62122481:rs952275:rs533617:rs1800481	5
ENSG00000119771	KLHL29	2	23608088	23931481	1	protein_coding	114818	KLHL29	NA	-0.399832	0	0	0	NA	NA	NA	NA	Yes	IMR90:Mesenchymal_Stem_Cell:Trophoblast-like_Cell	4e-18	rs10184054:rs62122481:rs952275:rs533617:rs1800481:rs668948;rs1800481:rs60403635:rs668948:rs668948;rs34601365;rs432483:rs34468875:rs34601365:rs12618122:rs368220458:rs4635554:rs432483:rs432483;rs1848922:rs1848922	5
ENSG00000224361	AC011239.1	2	23729913	23747214	-1	protein_coding	NA	NA	NA	NA	0	0	0	NA	NA	NA	NA	Yes	IMR90	4.7e-17	rs10184054:rs62122481:rs952275:rs533617	5
ENSG00000143970	ASXL2	2	25956622	26101385	-1	protein_coding	55252	ASXL2	0.992739	NA	0	0	0	NA	NA	NA	NA	Yes	Fetal_Cortex	1.2e-22	rs4665377;rs1395;rs12053390:rs12053390:rs8179219:rs780110;rs556013357;2:27498734_ACCCCCG_A;rs7423104	6
ENSG00000268412	AC013449.1	2	26251074	26251481	-1	protein_coding	NA	NA	NA	NA	0	0	0	NA	NA	NA	NA	Yes	Adult_Cortex	1.2e-22	rs4665377;rs1395;rs12053390:rs12053390:rs8179219:rs780110;rs556013357;2:27498734_ACCCCCG_A;rs7423104	6
ENSG00000084733	RAB10	2	26256976	26360323	1	protein_coding	10890	RAB10	0.944405	-0.583905	0	0	0	NA	NA	NA	NA	Yes	Adult_Cortex	1.2e-22	rs4665377;rs1395;rs12053390:rs12053390:rs8179219:rs780110;rs556013357;2:27498734_ACCCCCG_A;rs7423104	6
ENSG00000173567	GPR113	2	26531041	26569685	-1	protein_coding	165082	GPR113	1.48529e-10	0.291622	0	0	0	NA	NA	NA	NA	Yes	Fetal_Cortex	1.2e-22	rs4665377;rs1395;rs12053390:rs12053390:rs8179219:rs780110;rs556013357;2:27498734_ACCCCCG_A;rs7423104	6
ENSG00000157856	DRC1	2	26624784	26679579	1	protein_coding	92749	DRC1	1.30453e-10	0.353226	0	0	0	NA	NA	NA	NA	Yes	Adult_Cortex:Fetal_Cortex:Mesenchymal_Stem_Cell	6.3e-32	rs4665377;rs1395;rs12053390:rs12053390:rs8179219:rs780110;rs556013357;2:27498734_ACCCCCG_A;rs7423104:rs74340299:rs780110;rs556013357:rs780110:rs35686293:rs76476582:rs74630263	6
ENSG00000213699	SLC35F6	2	26987152	27004099	1	protein_coding	54978	SLC35F6	0.0161308	-0.353051	0	0	0	NA	NA	NA	NA	Yes	Adult_Cortex:Fetal_Cortex	6.3e-32	rs4665377;rs1395;rs12053390:rs12053390:rs8179219:rs780110;rs556013357;2:27498734_ACCCCCG_A;rs7423104:rs74340299:rs780110;rs556013357:rs780110	6
ENSG00000115163	CENPA	2	26987157	27023935	1	protein_coding	1058	CENPA	0.139975	-0.808381	0	0	0	NA	NA	NA	NA	Yes	Adult_Cortex:Fetal_Cortex	6.3e-32	rs4665377;rs1395;rs12053390:rs12053390:rs8179219:rs780110;rs556013357;2:27498734_ACCCCCG_A;rs7423104:rs74340299:rs780110;rs556013357:rs780110	6
ENSG00000084764	MAPRE3	2	27193480	27250064	1	protein_coding	22924	MAPRE3	0.799864	-0.767319	0	0	6	0.000127027	6.08981e-07	GTEx/v8/Adipose_Subcutaneous:GTEx/v8/Adipose_Visceral_Omentum	-	Yes	Adult_Cortex:Fetal_Cortex:Spleen:GM12878:Mesenchymal_Stem_Cell:Trophoblast-like_Cell	9e-77	rs4665386;rs1870325;rs74630263:rs4665377;rs1395;rs12053390:rs12053390:rs8179219:rs780110;rs556013357;2:27498734_ACCCCCG_A;rs7423104:rs77535061;rs76476582:rs34796799:rs74340299:rs1395;rs12053390:rs4665377;rs1395:2:27498734_ACCCCCG_A:rs4665377;rs12053390:rs149996558:rs80051818:rs556013357:rs780110;2:27498734_ACCCCCG_A:rs35686293;rs115640879:rs780110;rs556013357:rs780110:rs142398019:rs76476582:rs780…	6
ENSG00000119777	TMEM214	2	27255778	27264563	1	protein_coding	54867	TMEM214	0.00116736	-0.517228	0	0	0	NA	NA	NA	NA	Yes	Adult_Cortex:Fetal_Cortex:GM12878:IMR90	9e-77	rs4665377;rs1395;rs12053390:rs12053390:rs8179219:rs780110;rs556013357;2:27498734_ACCCCCG_A;rs7423104:rs80051818:rs76476582:rs780110;2:27694905_CA_C;rs7423104:rs1260326:rs1395;rs12053390:rs4665377;rs1395:rs74630263:2:27498734_ACCCCCG_A:rs74340299:rs34796799:rs77535061;rs76476582:rs4665377;rs12053390:rs149996558:rs556013357:rs780110;2:27498734_ACCCCCG_A:rs35686293;rs115640879:rs780110;rs556013357:r…	6
ENSG00000084693	AGBL5	2	27265232	27293490	1	protein_coding	60509	AGBL5	0.0206949	-0.378651	0	0	0	NA	NA	NA	NA	Yes	GM12878:IMR90	9e-77	rs1395;rs12053390:rs4665377;rs1395:rs4665377;rs12053390:rs74630263:rs12053390:2:27498734_ACCCCCG_A:rs74340299:rs34796799:rs77535061;rs76476582:rs4665377;rs12053390:rs149996558:rs8179219:rs80051818:rs556013357:rs780110;rs556013357;2:27498734_ACCCCCG_A;rs7423104:rs780110;2:27498734_ACCCCCG_A:rs35686293;rs115640879:rs780110;rs556013357:rs780110:rs142398019:rs76476582:rs780110;2:27694905_CA_C;rs74231…	6
ENSG00000228474	OST4	2	27293340	27294641	-1	protein_coding	100128731	OST4	NA	NA	0	0	0	NA	NA	NA	NA	Yes	Adult_Cortex:Fetal_Cortex:Liver:Spleen:GM12878:IMR90:Mesenchymal_Stem_Cell:Mesendoderm:Trophoblast-like_Cell:hESC	9e-77	rs12053390:rs77535061;rs76476582:rs34796799:rs8179219:rs4665377;rs1395;rs12053390:rs74340299:rs780110;rs556013357;2:27498734_ACCCCCG_A;rs7423104:rs80051818:rs76476582:rs780110;2:27694905_CA_C;rs7423104:rs1260326:rs780110;rs556013357:rs780110:rs74630263:rs35686293:rs1395;rs12053390:rs4665377;rs1395:2:27498734_ACCCCCG_A:rs4665377;rs12053390:rs149996558:rs2580757:rs1395:rs556013357:rs780110;2:274987…	6
ENSG00000138080	EMILIN1	2	27301435	27309271	1	protein_coding	11117	EMILIN1	0.00521656	NA	0	0	0	NA	NA	NA	NA	Yes	Promoter_anchored_loops:Adult_Cortex:Fetal_Cortex:Liver:Spleen:GM12878:IMR90:Mesenchymal_Stem_Cell:Mesendoderm:Trophoblast-like_Cell:hESC	9e-77	rs12053390:rs4665377;rs1395;rs12053390:rs74340299:rs34796799:rs77535061;rs76476582:rs4665377;rs12053390:rs149996558:rs74630263:rs8179219:rs780110;rs556013357;2:27498734_ACCCCCG_A;rs7423104:rs80051818:rs76476582:rs780110;2:27694905_CA_C;rs7423104:rs1260326:rs780110;rs556013357:rs780110:rs780110;2:27498734_ACCCCCG_A:rs4665377;rs1395:rs1395;rs12053390:2:27498734_ACCCCCG_A:rs780110;2:27498734_ACCCCCG…	6
ENSG00000138030	KHK	2	27309615	27323640	1	protein_coding	3795	KHK	5.36079e-05	NA	2	4.743	129	7.23788e-13	2.2178e-62	GTEx/v8/Adipose_Subcutaneous:GTEx/v8/Adipose_Visceral_Omentum:GTEx/v8/Artery_Aorta:GTEx/v8/Artery_Tibial:GTEx/v8/Heart_Left_Ventricle:GTEx/v8/Pancreas	-	Yes	Promoter_anchored_loops:Adult_Cortex:Fetal_Cortex:Liver:Spleen:GM12878:IMR90:Mesenchymal_Stem_Cell:Mesendoderm:Trophoblast-like_Cell:hESC	9e-77	rs35686293;rs76476582;rs74630263;rs2580757;rs1395;rs4665377;rs12053390;rs34796799;rs3817588;rs11682583;rs58199976;rs202049562;2:27832736_CA_C;rs4665386;rs113160276;rs1870325;rs13013484;rs6714106;rs12053390:rs4665377;rs12053390:rs74630263:rs12053390:rs1395:rs4665377;rs1395:2:27498734_ACCCCCG_A:rs77535061;rs76476582:rs34796799:rs8179219:rs74340299:rs4665377;rs12053390:rs149996558:rs780110;rs5560133…	6
ENSG00000138028	CGREF1	2	27321757	27341995	-1	protein_coding	10669	CGREF1	5.50291e-08	0.491986	2	4.743	0	NA	NA	NA	NA	Yes	Promoter_anchored_loops:Adult_Cortex:Fetal_Cortex:Aorta:Left_Ventricle:Liver:Spleen:GM12878:IMR90:Mesenchymal_Stem_Cell:Mesendoderm:Trophoblast-like_Cell:hESC	9e-77	rs35686293;rs76476582;rs4665377;rs1395;rs12053390:rs1395:rs1395;rs12053390:rs4665377;rs1395:rs12053390:rs74340299:rs34796799:rs77535061;rs76476582:rs4665377;rs12053390:rs149996558:rs35686293:rs76476582:rs74630263:rs8179219:rs780110;rs556013357;2:27498734_ACCCCCG_A;rs7423104:rs80051818:rs780110;2:27498734_ACCCCCG_A:rs35686293;rs115640879:rs780110;2:27694905_CA_C;rs7423104:rs1260326:rs780110;rs5560…	6
ENSG00000143994	ABHD1	2	27346682	27353680	1	protein_coding	84696	ABHD1	1.06027e-21	-0.251069	1	1.885	4	3.3649e-05	0.00344467	GTEx/v8/Adipose_Visceral_Omentum	-	Yes	Promoter_anchored_loops:Adult_Cortex:Fetal_Cortex:Aorta:Left_Ventricle:Liver:Spleen:GM12878:IMR90:Mesenchymal_Stem_Cell:Mesendoderm:Trophoblast-like_Cell:hESC	9e-77	rs74630263;rs2580757;rs4665377;rs1395;rs12053390:rs1395:rs1395;rs12053390:rs4665377;rs1395:rs12053390:rs74340299:rs34796799:rs77535061;rs76476582:rs4665377;rs12053390:rs149996558:rs35686293:rs76476582:rs74630263:rs8179219:rs780110;rs556013357;2:27498734_ACCCCCG_A;rs7423104:rs80051818:rs780110;2:27498734_ACCCCCG_A:rs35686293;rs115640879:rs780110;2:27694905_CA_C;rs7423104:rs1260326:rs780110;rs55601…	6
ENSG00000138073	PREB	2	27353624	27357543	-1	protein_coding	10113	PREB	0.00189836	-0.154459	1	1.885	1	0.000203631	0.000891037	GTEx/v8/Adipose_Subcutaneous	+	Yes	Promoter_anchored_loops:Adult_Cortex:Fetal_Cortex:Aorta:Left_Ventricle:Liver:Spleen:GM12878:IMR90:Mesenchymal_Stem_Cell:Mesendoderm:Trophoblast-like_Cell:hESC	9e-77	rs74630263;rs2580757;rs8179219:rs80051818:rs780110;rs556013357;2:27498734_ACCCCCG_A;rs7423104:rs76476582:rs780110;2:27694905_CA_C;rs7423104:rs1260326:rs4665377;rs1395:rs1395;rs12053390:rs4665377;rs1395;rs12053390:rs74630263:rs12053390:rs77535061;rs76476582:rs34796799:rs74340299:rs780110;2:27498734_ACCCCCG_A:rs35686293;rs115640879:rs780110;rs556013357:rs780110:rs35686293:2:27498734_ACCCCCG_A:rs466…	6
ENSG00000186143	C2orf53	2	27359723	27362278	-1	protein_coding	339779	C2orf53	1.54927e-09	0.624914	1	1.885	0	NA	NA	NA	NA	Yes	Promoter_anchored_loops:Fetal_Cortex:Spleen:GM12878:IMR90:Mesenchymal_Stem_Cell:Mesendoderm	1.2e-22	rs74630263;rs1395;rs12053390:rs4665377;rs12053390:rs74630263:rs35686293:rs12053390:rs74340299:rs34796799:rs77535061;rs76476582:rs4665377;rs12053390:rs149996558:rs8179219:rs780110;rs556013357;2:27498734_ACCCCCG_A;rs7423104:rs76476582:rs1395:rs4665377;rs1395:2:27498734_ACCCCCG_A	6
ENSG00000163792	TCF23	2	27371872	27376378	1	protein_coding	150921	TCF23	0.000503312	-0.683069	12	15.48	0	NA	NA	NA	NA	Yes	Promoter_anchored_loops:Spleen:GM12878:IMR90:Mesenchymal_Stem_Cell:Mesendoderm	1.2e-22	rs2580757;rs4665377;rs1395;rs12053390:rs1395;rs12053390:rs35686293:rs12053390:rs74340299:rs34796799:rs77535061;rs76476582:rs4665377;rs12053390:rs149996558:rs8179219:rs780110;rs556013357;2:27498734_ACCCCCG_A;rs7423104:rs74630263:rs76476582:rs1395:rs4665377;rs1395:2:27498734_ACCCCCG_A	6
ENSG00000138074	SLC5A6	2	27422455	27435826	-1	protein_coding	8884	SLC5A6	0.571968	-0.400099	34	22.3	272	4.48883e-22	1.13875e-17	GTEx/v8/Adipose_Subcutaneous:GTEx/v8/Artery_Aorta:GTEx/v8/Artery_Coronary:GTEx/v8/Artery_Tibial:GTEx/v8/Heart_Atrial_Appendage:GTEx/v8/Heart_Left_Ventricle:GTEx/v8/Pancreas	+	Yes	Promoter_anchored_loops:Adult_Cortex:Fetal_Cortex:IMR90:Mesenchymal_Stem_Cell:Mesendoderm:hESC	9e-77	rs1395;rs12053390;rs4665377;rs35686293;rs780110;rs556013357;2:27498734_ACCCCCG_A;rs7423104;rs8179219;2:27694905_CA_C;rs62138973;rs2580757;rs1260326;2:27739880_CT_C;rs35686293:rs76476582:rs4665377;rs12053390:rs12053390:rs8179219:rs780110;rs7423104:rs80051818:rs780110;rs7423104:rs1260326:rs74630263:rs2580757:rs1395:rs1395;rs12053390:rs4665377;rs1395:2:27498734_ACCCCCG_A:rs74340299:rs34796799:rs7753…	6
ENSG00000138085	ATRAID	2	27434895	27440046	1	protein_coding	51374	ATRAID	0.00791395	NA	23	15.27	279	2.34859e-32	5.3045e-26	GTEx/v8/Adipose_Subcutaneous:GTEx/v8/Adipose_Visceral_Omentum:GTEx/v8/Artery_Aorta:GTEx/v8/Artery_Coronary:GTEx/v8/Artery_Tibial:GTEx/v8/Heart_Atrial_Appendage:GTEx/v8/Heart_Left_Ventricle:GTEx/v8/Liver:GTEx/v8/Pancreas	-	Yes	Promoter_anchored_loops:Adult_Cortex:Fetal_Cortex:IMR90:Mesenchymal_Stem_Cell:Mesendoderm:hESC	7e-87	rs1395;rs12053390;rs4665377;rs35686293;rs2580757;rs74630263;rs780110;rs556013357;2:27498734_ACCCCCG_A;rs7423104;2:27694905_CA_C;rs1260326;rs3817588;rs74340299;rs201353310;rs78653657;rs74974644;rs13016086;rs11682583;rs35686293:rs76476582:rs4665377;rs12053390:rs12053390:rs8179219:rs780110;rs7423104:rs80051818:rs780110;rs7423104:rs1260326:rs74630263:rs2580757:rs1395:rs1395;rs12053390:rs4665377;rs139…	6
ENSG00000084774	CAD	2	27440258	27466811	1	protein_coding	790	CAD	1	-0.710759	47	15.27	257	1.82619e-25	9.08683e-20	GTEx/v8/Adipose_Subcutaneous:GTEx/v8/Heart_Atrial_Appendage:GTEx/v8/Heart_Left_Ventricle:GTEx/v8/Pancreas	-	Yes	Promoter_anchored_loops:Adult_Cortex:Fetal_Cortex:Liver:Spleen:GM12878:IMR90:Mesenchymal_Stem_Cell:Mesendoderm:Trophoblast-like_Cell:hESC	9e-77	rs4665377;rs1395;rs12053390;rs35686293;rs8179219;rs780110;rs556013357;2:27498734_ACCCCCG_A;rs7423104;2:27694905_CA_C;rs1260326;rs35686293:rs76476582:rs2580757:rs780110;rs7423104:rs80051818:rs8179219:rs780110;2:27498734_ACCCCCG_A:rs35686293;rs115640879:rs34796799:rs4665377;rs12053390:rs12053390:rs780110;rs7423104:rs1260326:rs74630263:rs1395;rs12053390:rs4665377;rs1395:2:27498734_ACCCCCG_A:rs743402…	6
ENSG00000115194	SLC30A3	2	27476552	27498685	-1	protein_coding	7781	SLC30A3	0.646084	-0.660463	48	15.72	1	2.22523e-09	7.40729e-24	GTEx/v8/Heart_Left_Ventricle	+	Yes	Promoter_anchored_loops:Fetal_Cortex:Aorta:Left_Ventricle:Liver:Spleen:GM12878:IMR90:Mesenchymal_Stem_Cell:Mesendoderm:Trophoblast-like_Cell:hESC	9e-77	rs1395;rs12053390;rs4665377;rs76476582;rs74630263;2:27498734_ACCCCCG_A;rs74340299;rs34796799;rs77535061;rs149996558;rs67086575;rs35686293:rs76476582:rs1395;rs12053390:rs1395:rs4665377;rs1395:rs12053390:rs77535061;rs76476582:rs34796799:rs8179219:rs4665377;rs12053390:rs74340299:rs780110;rs556013357;rs7423104:rs780110;rs556013357:rs780110:rs74630263:rs80051818:rs556013357:rs780110;2:27498734_ACCCCCG…	6
ENSG00000163793	DNAJC5G	2	27498289	27504367	1	protein_coding	285126	DNAJC5G	0.00397479	-0.706718	28	15.72	9	3.7699e-05	0.0236178	GTEx/v8/Artery_Tibial	-	Yes	Promoter_anchored_loops:Fetal_Cortex:Aorta:Left_Ventricle:Liver:Spleen:GM12878:IMR90:Mesenchymal_Stem_Cell:Mesendoderm:Trophoblast-like_Cell:hESC	9e-77	rs4665377;rs1395;rs12053390;rs74630263;2:27498734_ACCCCCG_A;rs74340299;rs34796799;rs77535061;rs76476582;rs149996558;rs201353310;rs7423104;rs35686293:rs76476582:rs1395;rs12053390:rs1395:rs4665377;rs1395:rs12053390:rs77535061;rs76476582:rs34796799:rs8179219:rs4665377;rs12053390:rs74340299:rs780110;rs556013357;rs7423104:rs780110;rs556013357:rs780110:rs74630263:rs80051818:rs556013357:rs780110;2:27498…	6
ENSG00000138100	TRIM54	2	27505260	27530307	1	protein_coding	57159	TRIM54	8.24708e-07	-1.05327	46	15.72	0	NA	NA	NA	NA	Yes	Promoter_anchored_loops:Adult_Cortex:Aorta:Left_Ventricle:Liver:Spleen:GM12878:IMR90:Mesenchymal_Stem_Cell:Mesendoderm:Trophoblast-like_Cell:hESC	9e-77	rs12053390;2:27498734_ACCCCCG_A;rs4665377;rs1395;rs74340299;rs34796799;rs77535061;rs76476582;rs149996558;rs8179219;rs35686293;rs78653657;rs35686293:rs76476582:rs2580757:rs4665377;rs12053390:rs1395;rs12053390:rs4665377;rs1395:rs12053390:rs8179219:rs780110;rs556013357;rs7423104:rs74630263:rs80051818:rs556013357:rs780110;2:27498734_ACCCCCG_A:rs35686293;rs115640879:rs34796799:rs780110;rs556013357:rs7…	6
ENSG00000163794	UCN	2	27530268	27531313	-1	protein_coding	7349	UCN	0.51724	-0.107138	18	9.058	0	NA	NA	NA	NA	Yes	Promoter_anchored_loops	3.7e-13	rs4665377;rs8179219;rs1395;rs12053390;rs35686293;rs74340299;rs78653657;rs35686293:rs76476582:rs2580757:rs1395:rs1395;rs12053390:rs4665377	6
ENSG00000115204	MPV17	2	27532360	27548547	-1	protein_coding	4358	MPV17	1.10287e-08	-0.205369	26	18.95	0	NA	NA	NA	NA	Yes	Promoter_anchored_loops:Adult_Cortex:Fetal_Cortex	9e-77	rs4665377;rs8179219;rs1395;rs12053390;rs35686293;rs74340299;rs78653657;rs780110;rs556013357;2:27498734_ACCCCCG_A;rs7423104;rs76476582;rs12053390:rs1395:rs4665377;rs1395:rs4665377;rs12053390:rs74630263:rs12053390:rs77535061;rs76476582:rs34796799:rs8179219:rs74340299:rs4665377:rs35686293:rs74340299;rs78653657:rs780110;2:27498734_ACCCCCG_A:rs780110;rs7423104:rs780110;rs556013357:rs780110:rs142398019…	6
ENSG00000115207	GTF3C2	2	27548716	27579868	-1	protein_coding	2976	GTF3C2	0.999786	-0.837016	47	18.95	0	NA	NA	NA	NA	Yes	Promoter_anchored_loops:Adult_Cortex:Fetal_Cortex:Liver:GM12878:IMR90:Mesenchymal_Stem_Cell:Mesendoderm:Trophoblast-like_Cell:hESC	9e-77	rs4665377;rs1395;rs12053390;rs8179219;rs780110;rs556013357;2:27498734_ACCCCCG_A;rs7423104;rs76476582;rs80051818;rs35686293;rs115640879;rs34796799;rs142398019;rs12053390:rs1395;rs12053390:rs35686293:rs8179219:rs80051818:rs780110;rs7423104:rs76476582:rs780110;2:27694905_CA_C;rs7423104:rs1260326:rs113160276:rs58199976;rs13013484;rs202049562;2:27832736_CA_C;rs4665386:rs77200710;2:28003616_TA_T:rs2013…	6
ENSG00000115211	EIF2B4	2	27587219	27593353	-1	protein_coding	8890	EIF2B4	0.83261	-0.214235	34	18.47	0	NA	NA	NA	NA	Yes	Promoter_anchored_loops:Adult_Cortex:Fetal_Cortex:Liver:GM12878:IMR90:Mesenchymal_Stem_Cell:Mesendoderm:Trophoblast-like_Cell:hESC	9e-77	rs8179219;rs780110;rs556013357;2:27498734_ACCCCCG_A;rs7423104;rs142398019;rs80051818;rs76476582;2:27694905_CA_C;rs1260326;rs74630263:rs780110;rs7423104:rs80051818:rs8179219:rs780110;2:27498734_ACCCCCG_A:rs35686293;rs115640879:rs34796799:rs780110;rs7423104:rs780110;rs556013357:rs780110;2:27498734_ACCCCCG_A:rs780110:rs4665377;rs1395;rs12053390:rs1395;rs12053390:rs4665377;rs1395:rs35686293:rs7647658…	6
ENSG00000115234	SNX17	2	27593389	27599995	1	protein_coding	9784	SNX17	0.68618	-0.681943	33	18.47	258	1.17643e-13	2.00912e-09	GTEx/v8/Adipose_Subcutaneous:GTEx/v8/Artery_Aorta:GTEx/v8/Artery_Tibial:GTEx/v8/Heart_Atrial_Appendage:GTEx/v8/Heart_Left_Ventricle	+	Yes	Promoter_anchored_loops:Adult_Cortex:Fetal_Cortex:Liver:GM12878:IMR90:Mesenchymal_Stem_Cell:Mesendoderm:Trophoblast-like_Cell:hESC	7e-87	rs780110;rs556013357;2:27498734_ACCCCCG_A;rs7423104;rs8179219;rs142398019;rs80051818;rs76476582;2:27694905_CA_C;rs1260326;rs74630263;rs201353310;rs1395;rs12053390;rs4665377;2:27739880_CT_C;rs113160276;rs11682583;rs4665985;rs77200710;2:28003616_TA_T;rs67798437;rs74630263:rs780110;rs7423104:rs80051818:rs8179219:rs780110;2:27498734_ACCCCCG_A:rs35686293;rs115640879:rs34796799:rs780110;rs7423104:rs780…	6
ENSG00000163795	ZNF513	2	27600098	27603657	-1	protein_coding	130557	ZNF513	0.940738	NA	29	18.47	67	3.61445e-05	0.0342333	GTEx/v8/Artery_Aorta	-	Yes	Promoter_anchored_loops:Adult_Cortex:Fetal_Cortex:GM12878:IMR90:Mesenchymal_Stem_Cell	9e-77	rs8179219;rs80051818;rs780110;rs556013357;2:27498734_ACCCCCG_A;rs7423104;rs76476582;2:27694905_CA_C;rs1260326;rs74630263;rs74340299;rs3817588;rs58199976;rs202049562;2:27832736_CA_C;rs13013484;rs4665386;rs7423104:rs8179219:rs780110;2:27498734_ACCCCCG_A:rs1728918:rs780110;2:27498734_ACCCCCG_A:rs77535061;rs76476582:rs74630263:rs780110;rs7423104:rs780110;rs556013357:rs780110:rs201353310:rs4665377;rs1…	6
ENSG00000115241	PPM1G	2	27604061	27632554	-1	protein_coding	5496	PPM1G	0.99601	-0.482626	65	12.85	305	1.94157e-13	1.67809e-09	GTEx/v8/Adipose_Subcutaneous:GTEx/v8/Adipose_Visceral_Omentum:GTEx/v8/Artery_Tibial:GTEx/v8/Heart_Atrial_Appendage:GTEx/v8/Pancreas	+	Yes	Promoter_anchored_loops:GM12878:IMR90:Mesenchymal_Stem_Cell	7e-87	rs76476582;rs780110;rs556013357;2:27694905_CA_C;2:27498734_ACCCCCG_A;rs7423104;rs8179219;rs1260326;rs74630263;rs74340299;rs535914125;rs1728918;rs77535061;rs1395;rs12053390;rs4665377;rs80051818;2:27739880_CT_C;rs67798437;rs201353310;rs2178198;rs7423104:rs780110:rs7423104:rs74630263:rs8179219:rs76476582:rs74340299:rs780110;2:27498734_ACCCCCG_A:rs780110;rs556013357:rs535914125:rs780110;rs7423104:rs8…	6
ENSG00000115216	NRBP1	2	27650657	27665126	1	protein_coding	29959	NRBP1	0.999549	-1.38971	47	14.1	392	1.48664e-19	1.00894e-14	GTEx/v8/Adipose_Subcutaneous:GTEx/v8/Adipose_Visceral_Omentum:GTEx/v8/Artery_Aorta:GTEx/v8/Artery_Tibial:GTEx/v8/Heart_Atrial_Appendage	+	Yes	Promoter_anchored_loops:Adult_Cortex:Fetal_Cortex:Liver:GM12878:IMR90:Mesenchymal_Stem_Cell:Mesendoderm:Trophoblast-like_Cell:hESC	7e-87	rs780110;rs556013357;2:27498734_ACCCCCG_A;rs7423104;rs74630263;2:27694905_CA_C;rs8179219;rs77535061;rs76476582;rs3817588;rs1395;rs12053390;rs4665377;rs80051818;rs1260326;rs1728918;rs11682583;2:27739880_CT_C;rs67798437;rs201353310;rs77200710;rs4665985;rs113160276;rs67086575;2:28003616_TA_T;rs8179219:rs80051818:rs780110;rs7423104:rs76476582:rs780110;rs7423104:rs1260326:rs780110:rs7423104:rs74630263…	6
ENSG00000157992	KRTCAP3	2	27665233	27669348	1	protein_coding	200634	KRTCAP3	0.0445235	NA	29	10.57	245	7.8778e-12	1.02369e-07	GTEx/v8/Adipose_Visceral_Omentum:GTEx/v8/Pancreas	-	Yes	Promoter_anchored_loops:Liver:GM12878:IMR90:Mesenchymal_Stem_Cell:Mesendoderm:Trophoblast-like_Cell:hESC	7e-87	rs780110;rs556013357;2:27694905_CA_C;2:27498734_ACCCCCG_A;rs7423104;rs8179219;rs77535061;rs76476582;rs3817588;rs74630263;rs11682583;rs1395;rs12053390;rs80051818;rs1260326;2:27739880_CT_C;rs67798437;rs201353310;rs8179219:rs780110;2:27498734_ACCCCCG_A:rs780110;rs7423104:rs780110;rs556013357:rs780110:rs142398019:rs7423104:rs74630263:rs76476582:rs74340299:rs535914125:rs780110;2:27498734_ACCCCCG_A:rs1…	6
ENSG00000138002	IFT172	2	27667238	27712656	-1	protein_coding	26160	IFT172	2.29012e-18	-0.505255	82	15.52	0	NA	NA	NA	NA	Yes	Promoter_anchored_loops:Adult_Cortex:Fetal_Cortex:Left_Ventricle:Liver:GM12878:IMR90:Mesenchymal_Stem_Cell:Mesendoderm:Trophoblast-like_Cell:hESC	7e-87	rs780110;rs556013357;2:27694905_CA_C;2:27498734_ACCCCCG_A;rs7423104;rs8179219;rs77535061;rs76476582;rs3817588;rs74630263;rs11682583;rs67086575;rs62138973;rs35686293;rs115640879;rs7423104:rs780110;rs556013357:rs780110;2:27498734_ACCCCCG_A:rs67798437;rs201353310:rs77200710;rs4665985:rs58199976;rs202049562;2:27832736_CA_C:rs201353310:rs34796799:rs4665377;rs1395;rs12053390:rs12053390:rs8179219:rs7801…	6
ENSG00000115226	FNDC4	2	27714750	27718112	-1	protein_coding	64838	FNDC4	0.759219	NA	28	15.52	0	NA	NA	NA	NA	Yes	Promoter_anchored_loops:Adult_Cortex:Fetal_Cortex:Left_Ventricle:Liver:GM12878:IMR90:Mesenchymal_Stem_Cell:Mesendoderm:Trophoblast-like_Cell:hESC	7e-87	rs780110;rs556013357;2:27498734_ACCCCCG_A;rs35686293;rs115640879;rs8179219;2:27694905_CA_C;rs7423104;rs62138973;rs7423104:rs780110;rs556013357:rs780110;2:27498734_ACCCCCG_A:rs67798437;rs201353310:rs77200710;rs4665985:rs58199976;rs202049562;2:27832736_CA_C:rs201353310:rs34796799:rs4665377;rs1395;rs12053390:rs12053390:rs8179219:rs780110;rs7423104:rs74340299:rs780110:rs201353310;rs7423104:rs62138973…	6
ENSG00000084734	GCKR	2	27719709	27746554	1	protein_coding	2646	GCKR	3.58393e-16	-0.155698	79	15.52	0	NA	NA	NA	NA	Yes	Promoter_anchored_loops:EP_correlation_organ_oneway:Adult_Cortex:Fetal_Cortex:Left_Ventricle:Liver:GM12878:IMR90:Mesenchymal_Stem_Cell:Mesendoderm:Trophoblast-like_Cell:hESC	7e-87	rs780110;rs556013357;2:27498734_ACCCCCG_A;rs35686293;rs115640879;rs8179219;2:27694905_CA_C;rs7423104;rs62138973;rs1260326;rs3817588;2:27739880_CT_C;2:27738632_ATTTT_A;rs34796799;rs80051818;rs74340299;rs4665985;rs58199976;rs202049562;2:27832736_CA_C;rs67798437;rs201353310;rs77200710;rs7423104:rs780110;rs556013357:rs780110;2:27498734_ACCCCCG_A:rs67798437;rs201353310:rs77200710;rs4665985:rs58199976;…	6
ENSG00000233438	AC109829.1	2	27760253	27790011	1	protein_coding	NA	NA	NA	NA	92	12.33	0	NA	NA	NA	NA	Yes	IMR90:Mesenchymal_Stem_Cell:Mesendoderm:Trophoblast-like_Cell:hESC	7e-87	rs1260326;2:27739880_CT_C;rs3817588;rs780110;rs74340299;rs4665985;rs58199976;rs202049562;2:27832736_CA_C;rs67798437;rs201353310;rs77200710;rs78653657;rs13013484;rs4665386;2:27766414_CA_C;rs7423104;rs11682583;2:27786252_CTTTTTTTTTT_C;rs77535061;rs80051818:rs556013357:rs780110;rs556013357;2:27498734_ACCCCCG_A;rs7423104:rs780110;2:27498734_ACCCCCG_A:rs8179219:rs35686293;rs115640879:rs34796799:rs7801…	6
ENSG00000221843	C2orf16	2	27799389	27805588	1	protein_coding	84226	C2orf16	3.91662e-17	-0.329747	28	17.52	3	4.21915e-06	0.0141403	GTEx/v8/Liver	-	Yes	IMR90:Mesenchymal_Stem_Cell:Mesendoderm:Trophoblast-like_Cell:hESC	7e-87	rs58199976;rs202049562;2:27832736_CA_C;rs77200710;rs4665985;rs201353310;rs7423104;rs67798437;rs77535061;rs34796799;rs3817588;rs80051818:rs556013357:rs780110;rs556013357;2:27498734_ACCCCCG_A;rs7423104:rs780110;2:27498734_ACCCCCG_A:rs8179219:rs35686293;rs115640879:rs34796799:rs780110;rs556013357:rs780110:rs142398019:rs76476582:rs780110;2:27694905_CA_C;rs7423104:rs1260326:rs74630263:rs780110;2:27498…	6
ENSG00000243943	ZNF512	2	27805897	27858041	1	protein_coding	84450	ZNF512	0.949147	-1.27925	110	18.65	6	8.67923e-05	0.0461625	GTEx/v8/Artery_Tibial	+	Yes	Promoter_anchored_loops:Adult_Cortex:Fetal_Cortex:Liver:GM12878:IMR90:Mesenchymal_Stem_Cell:Mesendoderm:Trophoblast-like_Cell:hESC	7e-87	rs77535061;rs67798437;rs201353310;rs58199976;rs202049562;2:27832736_CA_C;rs77200710;rs4665985;rs34796799;rs7423104;rs62138973;rs4665386;rs549596761;rs2141371;rs13013484;2:28003616_TA_T;rs780110;rs556013357;2:27498734_ACCCCCG_A:rs780110:rs35686293;rs115640879:rs8179219:rs780110;2:27694905_CA_C;2:27498734_ACCCCCG_A:rs780110;2:27498734_ACCCCCG_A;rs7423104:rs62138973:rs780110;2:27498734_ACCCCCG_A:rs4…	6
ENSG00000176714	CCDC121	2	27848506	27851879	-1	protein_coding	79635	CCDC121	9.72714e-05	-0.266319	42	18.65	0	NA	NA	NA	NA	Yes	Promoter_anchored_loops:Left_Ventricle:Liver:GM12878:IMR90:Mesenchymal_Stem_Cell:Mesendoderm:Trophoblast-like_Cell:hESC	7e-87	rs58199976;rs202049562;2:27832736_CA_C;rs67798437;rs201353310;rs77200710;rs4665985;rs7423104;rs62138973;rs4665386;rs549596761;rs2141371;rs780110;rs556013357;2:27694905_CA_C;2:27498734_ACCCCCG_A;rs7423104:rs77535061;rs76476582:rs3817588:rs74630263;rs11682583:rs8179219:rs780110:rs780110;2:27498734_ACCCCCG_A:rs67086575:rs780110;2:27498734_ACCCCCG_A:rs62138973:2:27694905_CA_C:rs35686293;rs115640879:r…	6
ENSG00000198522	GPN1	2	27851114	27874375	1	protein_coding	11321	GPN1	0.00490359	-0.238155	54	14.13	246	7.93394e-08	0.000297808	GTEx/v8/Heart_Atrial_Appendage:GTEx/v8/Heart_Left_Ventricle:GTEx/v8/Liver	+	Yes	Promoter_anchored_loops:Left_Ventricle:Liver:GM12878:IMR90:Mesenchymal_Stem_Cell:Mesendoderm:Trophoblast-like_Cell:hESC	7e-87	rs67798437;rs201353310;rs58199976;rs202049562;2:27832736_CA_C;rs7423104;rs62138973;rs77200710;rs4665386;rs549596761;rs2141371;rs13013484;2:28003616_TA_T;rs113160276;rs76476582;rs4665985;rs780110;rs556013357;2:27498734_ACCCCCG_A;2:27694905_CA_C;rs1260326;2:27739880_CT_C;rs7423104:rs77535061;rs76476582:rs3817588:rs74630263;rs11682583:rs8179219:rs780110:rs780110;2:27498734_ACCCCCG_A:rs67086575:rs780…	6
ENSG00000119760	SUPT7L	2	27873679	27886676	-1	protein_coding	9913	SUPT7L	0.833193	-0.966219	23	12.86	0	NA	NA	NA	NA	Yes	Promoter_anchored_loops:Adult_Cortex:Fetal_Cortex:GM12878:IMR90	7e-87	rs58199976;rs13013484;rs202049562;2:27832736_CA_C;rs4665386;rs77200710;2:28003616_TA_T;rs113160276;rs201353310;rs76476582;rs2178198;rs4665377;rs1395;rs12053390:rs1395:rs1395;rs12053390:rs780110;rs556013357;2:27498734_ACCCCCG_A;rs7423104:rs780110:rs7423104:rs74630263:rs8179219:rs780110;2:27694905_CA_C;rs7423104:rs780110;rs556013357:rs12053390:rs80051818:rs76476582:rs1260326:rs74340299:rs35686293;r…	6
ENSG00000163798	SLC4A1AP	2	27886338	27917840	1	protein_coding	22950	SLC4A1AP	7.73999e-07	-0.546764	20	15.03	179	2.84507e-09	8.71618e-06	GTEx/v8/Adipose_Subcutaneous:GTEx/v8/Adipose_Visceral_Omentum:GTEx/v8/Artery_Aorta:GTEx/v8/Artery_Tibial	-	Yes	Promoter_anchored_loops:Adult_Cortex:Fetal_Cortex:GM12878:IMR90	7e-87	rs76476582;rs201353310;rs58199976;rs13013484;rs202049562;2:27832736_CA_C;rs4665386;rs77200710;2:28003616_TA_T;rs2178198;rs1870325;rs78653657;rs150818831;rs67798437;rs7423104;rs2141371;rs6714106;rs199780998;rs780110;rs113160276;rs4665377;rs1395;rs12053390:rs1395:rs1395;rs12053390:rs780110;rs556013357;2:27498734_ACCCCCG_A;rs7423104:rs780110:rs7423104:rs74630263:rs8179219:rs780110;2:27694905_CA_C;rs…	6
ENSG00000205334	AC074091.13	2	27928653	27938599	-1	protein_coding	100129995	LINC01460	NA	NA	17	18.44	40	1.69114e-05	0.0188373	GTEx/v8/Artery_Aorta	+	Yes	Promoter_anchored_loops:Adult_Cortex:Aorta:Left_Ventricle:Liver:Right_Ventricle:Spleen:GM12878:IMR90:Mesenchymal_Stem_Cell:Mesendoderm:Trophoblast-like_Cell:hESC	3.9e-33	rs201353310;rs150818831;rs35686293;rs115640879;rs77200710;2:28003616_TA_T;rs1870325;rs4665386;rs58199976;rs13013484;rs202049562;2:27832736_CA_C;rs6722113:rs11889865:rs35937640;rs6722113:rs74974644:rs34796799:rs13013484;rs4665386:rs13013484;rs1870325:rs58199976;rs1870325:rs7349418:rs35937640:rs764054216:2:28003616_TA_T:rs1870325:rs1870325;rs11691385:rs1870325;rs6714106:rs1870325;rs57333567;rs11691…	6
ENSG00000243147	MRPL33	2	27994584	28210954	1	protein_coding	9553	MRPL33	0.749165	-0.22013	207	19.66	296	3.59543e-09	2.0615e-05	GTEx/v8/Heart_Atrial_Appendage	+	Yes	Adult_Cortex:Bladder:Left_Ventricle:GM12878:IMR90:Mesenchymal_Stem_Cell:Mesendoderm:hESC	3.9e-33	rs13013484;rs1870325;2:28003616_TA_T;rs58199976;rs74974644;rs34796799;rs4665386;rs764054216;rs11691385;rs6714106;rs13016086;rs199780998;rs57333567;2:28206809_CT_C;rs202049562;2:27832736_CA_C;rs201353310;rs7423104;rs201353310:rs150818831:rs35686293;rs115640879:rs77200710;2:28003616_TA_T:rs1870325;rs4665386:rs58199976:rs4665386:rs58199976;rs202049562:rs58199976;rs13013484:rs13013484;rs1870325:rs130…	6
ENSG00000268656	AC110084.1	2	27998851	28009186	-1	protein_coding	NA	NA	NA	NA	24	19.66	0	NA	NA	NA	NA	Yes	Promoter_anchored_loops:Left_Ventricle:Liver:IMR90:Mesenchymal_Stem_Cell:Mesendoderm:Trophoblast-like_Cell:hESC	2.7e-78	rs58199976;rs13013484;rs1870325;rs74974644;rs34796799;rs4665386;rs764054216;2:28003616_TA_T;rs8179219:rs780110;rs556013357;2:27498734_ACCCCCG_A:rs1260326;2:27739880_CT_C:rs3817588:rs780110:rs34796799:rs80051818:rs13013484;rs199780998;rs6714106:rs1870325;rs57333567;rs11691385:rs2178198:rs201353310:rs150818831:rs35686293;rs115640879:rs77200710;2:28003616_TA_T:rs1870325;rs4665386:rs58199976:rs466538…	6
ENSG00000171174	RBKS	2	28004231	28113965	-1	protein_coding	64080	RBKS	1.93198e-05	-0.689745	139	19.66	0	NA	NA	NA	NA	Yes	EP_correlation_cell_type_oneway:Aorta:Left_Ventricle:Liver:IMR90:Mesenchymal_Stem_Cell:Mesendoderm:Trophoblast-like_Cell:hESC	3.9e-33	rs34796799;rs13013484;rs1870325;rs58199976;rs74974644;rs764054216;rs4665386;2:28003616_TA_T;rs11691385;rs6714106;rs13016086;rs199780998;rs57333567;rs6714106:rs1870325:rs1870325;rs11691385:rs13013484;rs1870325:rs13013484;rs6714106:rs13016086;rs74974644:2:28003616_TA_T:rs1870325;rs11691385:rs1870325;rs6714106:rs199780998:rs11691385:rs937813:rs937813;rs11889865:rs13016086:rs35937640;rs6722113:rs1188…	6
ENSG00000158019	BRE	2	28112808	28561768	1	protein_coding	9577	BRE	0.279976	NA	224	16.05	2	5.80945e-05	0.00582956	GTEx/v8/Adipose_Subcutaneous	+	Yes	Aorta:Left_Ventricle:Liver:IMR90:Mesenchymal_Stem_Cell:Mesendoderm:Trophoblast-like_Cell:hESC	3.9e-33	rs13013484;rs1870325;rs199780998;rs6714106;rs57333567;rs11691385;2:28003616_TA_T;2:28206809_CT_C;rs2178198;rs34796799;rs115640879;rs13016086;rs74974644;rs937813;rs11889865;rs111882076;rs6722113;rs35937640;rs4666042;rs55807911;rs7349418;rs4666052;rs1870325:rs1870325;rs11691385:rs13013484;rs1870325:rs13013484;rs6714106:rs13016086;rs74974644:2:28003616_TA_T:rs13013484;rs6714106:rs1870325;rs11691385:…	6
ENSG00000075426	FOSL2	2	28615315	28640179	1	protein_coding	2355	FOSL2	0.925334	-2.20416	0	0	0	NA	NA	NA	NA	Yes	Promoter_anchored_loops:EP_correlation_cell_type_oneway:Aorta:Bladder:Left_Ventricle:Liver:Lung:Pancreas:Psoas:Right_Ventricle:Spleen:GM12878:IMR90:Mesenchymal_Stem_Cell:Mesendoderm:Neural_Progenitor_Cell:Trophoblast-like_Cell:hESC	9e-77	rs201353310:rs150818831:rs35686293;rs115640879:rs77200710;2:28003616_TA_T:rs1870325;rs4665386:rs58199976:rs4665386:rs58199976;rs13013484;rs202049562:rs58199976;rs13013484:rs34796799:rs13013484;rs1870325:2:28003616_TA_T:rs13013484:rs58199976;rs1870325:rs764054216:rs13013484;rs1870325;rs4665386:rs1870325;rs57333567;rs11691385:rs1870325:rs13013484;rs199780998;rs6714106:rs58199976;rs202049562;2:27832…	6
ENSG00000163803	PLB1	2	28680012	28866654	1	protein_coding	151056	PLB1	1.99315e-56	0.411384	0	0	0	NA	NA	NA	NA	Yes	Promoter_anchored_loops:Aorta:Left_Ventricle:Liver:Right_Ventricle:Spleen:GM12878:IMR90:Mesenchymal_Stem_Cell:Mesendoderm:Neural_Progenitor_Cell:Trophoblast-like_Cell:hESC	7e-87	rs67798437;rs201353310:rs77200710;rs4665985:rs58199976;rs202049562;2:27832736_CA_C:rs201353310:rs34796799:rs150818831:rs35686293;rs115640879:rs77200710;2:28003616_TA_T:rs1870325:rs1870325;rs11691385:rs13013484;rs1870325:rs13013484;rs1870325;rs6714106:rs13016086;rs74974644:2:28003616_TA_T:rs13013484;rs199780998;rs6714106:rs1870325;rs57333567;rs11691385:rs202049562:rs201353310;rs7423104:rs202049562…	6
ENSG00000213639	PPP1CB	2	28974506	29025806	1	protein_coding	5500	PPP1CB	0.997195	0.00183917	0	0	0	NA	NA	NA	NA	Yes	Adult_Cortex:Left_Ventricle:IMR90:Mesenchymal_Stem_Cell:Mesendoderm:Trophoblast-like_Cell:hESC	4.7e-47	rs780110;rs556013357;2:27498734_ACCCCCG_A;rs7423104:rs74340299:rs780110;rs556013357:rs780110:rs8179219:rs35686293;rs115640879:rs780110;2:27498734_ACCCCCG_A:rs780110;2:27694905_CA_C;rs7423104:rs62138973:rs780110;2:27498734_ACCCCCG_A:rs201353310:rs150818831:rs77200710;2:28003616_TA_T:rs74974644:rs34796799:rs13013484;rs1870325;rs4665386:rs13013484;rs1870325:rs58199976;rs13013484;rs1870325:rs76405421…	6
ENSG00000163806	SPDYA	2	29005383	29073477	1	protein_coding	245711	SPDYA	0.166884	NA	0	0	0	NA	NA	NA	NA	Yes	IMR90:Mesenchymal_Stem_Cell:Mesendoderm:Trophoblast-like_Cell:hESC	4.7e-47	rs77200710;rs4665985:rs58199976;rs202049562;2:27832736_CA_C:rs67798437;rs201353310:rs201353310:rs201353310;rs7423104:rs62138973:rs77200710:rs4665386:rs58199976;2:27832736_CA_C;rs4665386:rs58199976;2:27832736_CA_C:rs549596761:rs2141371:rs58199976;rs13013484;rs4665386:rs77200710;2:28003616_TA_T:rs113160276:rs76476582:rs150818831:rs35686293;rs115640879:rs1870325;rs4665386:rs58199976:rs58199976;rs130…	6
ENSG00000171103	TRMT61B	2	29072687	29093167	-1	protein_coding	55006	TRMT61B	4.00752e-06	-0.602142	0	0	0	NA	NA	NA	NA	Yes	Adult_Cortex:Fetal_Cortex:IMR90:Mesenchymal_Stem_Cell	4.7e-47	rs4665377;rs1395;rs12053390:rs12053390:rs8179219:rs780110;rs556013357;2:27498734_ACCCCCG_A;rs7423104:rs74340299:rs780110;rs556013357:rs780110:rs201353310:rs150818831:rs35686293;rs115640879:rs77200710;2:28003616_TA_T:rs74974644:rs34796799:rs13013484;rs1870325;rs4665386:rs13013484;rs1870325:rs58199976;rs13013484;rs1870325:rs77200710;rs4665985:rs58199976;rs202049562;2:27832736_CA_C:rs67798437;rs2013…	6
ENSG00000163811	WDR43	2	29117509	29171088	1	protein_coding	23160	WDR43	0.998942	1.45511	0	0	0	NA	NA	NA	NA	Yes	Fetal_Cortex:IMR90:Mesenchymal_Stem_Cell	3.9e-33	rs74974644:rs34796799:rs13013484;rs1870325;rs4665386:rs13013484;rs1870325:rs58199976;rs13013484;rs1870325:rs201353310:rs150818831:rs35686293;rs115640879:rs77200710;2:28003616_TA_T:rs1870325;rs4665386:rs58199976:rs4665386:rs58199976;rs202049562;2:27832736_CA_C;rs4665386:rs58199976;rs13013484:rs78653657:rs58199976	6
ENSG00000171094	ALK	2	29415640	30144432	-1	protein_coding	238	ALK	0.522363	-0.6249	0	0	0	NA	NA	NA	NA	Yes	Left_Ventricle	9.5e-49	rs77200710;rs4665985:rs13013484;rs202049562;2:27832736_CA_C:rs67798437;rs201353310:rs58199976;2:27832736_CA_C:rs201353310:rs4665386:rs77200710:2:27766414_CA_C:rs201353310;rs7423104:rs202049562:rs11682583:2:27786252_CTTTTTTTTTT_C:rs77535061	6
ENSG00000152128	TMEM163	2	135213330	135476570	-1	protein_coding	81615	TMEM163	0.0672625	0.397258	0	0	14	3.24677e-08	1.60223e-14	GTEx/v8/Artery_Aorta:GTEx/v8/Artery_Tibial	-	No	NA	4.5e-06	rs11681659	7
ENSG00000082258	CCNT2	2	135675805	135716912	1	protein_coding	905	CCNT2	0.498104	-1.29115	0	0	13	3.95125e-06	6.72446e-18	GTEx/v8/Artery_Aorta	+	No	NA	8.3e-06	rs11681659	7
ENSG00000176601	MAP3K19	2	135722061	135805038	-1	protein_coding	80122	MAP3K19	3.69885e-14	0.125206	0	0	0	NA	NA	NA	NA	Yes	GM12878:IMR90:Mesenchymal_Stem_Cell:Mesendoderm:hESC	2.2e-05	rs11681659	7
ENSG00000115839	RAB3GAP1	2	135809835	135933964	1	protein_coding	22930	RAB3GAP1	3.66101e-05	-0.439175	2	0.534	0	NA	NA	NA	NA	Yes	GM12878:IMR90:Mesenchymal_Stem_Cell:Mesendoderm:hESC	8.3e-06	rs11681659	7
ENSG00000121988	ZRANB3	2	135894486	136288806	-1	protein_coding	84083	ZRANB3	7.4264e-15	-0.51065	8	8.287	39	6.30127e-05	4.0053e-06	GTEx/v8/Artery_Tibial	-	No	NA	1.5e-05	rs11681659	7
ENSG00000048991	R3HDM1	2	136289025	136482840	1	protein_coding	23518	R3HDM1	0.00602514	-0.983617	6	21	0	NA	NA	NA	NA	No	NA	4.5e-06	rs11681659	7
ENSG00000144224	UBXN4	2	136499189	136542625	1	protein_coding	23190	UBXN4	0.974206	-0.658501	0	0	72	3.07575e-07	6.12378e-06	GTEx/v8/Artery_Tibial:GTEx/v8/Pancreas	-	Yes	EP_correlation_cell_type_oneway:Left_Ventricle:Liver:GM12878:IMR90:Mesenchymal_Stem_Cell:Mesendoderm:Trophoblast-like_Cell:hESC	6.2e-08	rs11681659	7
ENSG00000115850	LCT	2	136545410	136594750	-1	protein_coding	3938	LCT	0.064255	0.129442	20	12.93	0	NA	NA	NA	NA	No	NA	2.4e-05	rs11681659	7
ENSG00000076003	MCM6	2	136597196	136633996	-1	protein_coding	4175	MCM6	0.998482	0.155095	37	13.46	96	2.72387e-21	7.54241e-16	GTEx/v8/Adipose_Subcutaneous:GTEx/v8/Adipose_Visceral_Omentum:GTEx/v8/Artery_Aorta:GTEx/v8/Artery_Coronary:GTEx/v8/Artery_Tibial:GTEx/v8/Heart_Atrial_Appendage:GTEx/v8/Heart_Left_Ventricle	+	Yes	GM12878:Mesendoderm:hESC	2.1e-08	rs11681659	7
ENSG00000115866	DARS	2	136664247	136743670	-1	protein_coding	1615	DARS	0.000611999	0.123876	11	13.65	92	4.34153e-06	3.69417e-08	GTEx/v8/Adipose_Visceral_Omentum:GTEx/v8/Artery_Tibial	+	Yes	GM12878:IMR90:Mesenchymal_Stem_Cell:Mesendoderm:Neural_Progenitor_Cell:hESC	2.1e-08	rs11681659	7
ENSG00000121966	CXCR4	2	136871919	136875735	-1	protein_coding	7852	CXCR4	0.427451	-0.284617	0	0	0	NA	NA	NA	NA	Yes	Promoter_anchored_loops:EP_correlation_cell_type_oneway:EP_correlation_organ_oneway:Adult_Cortex:Fetal_Cortex:Aorta:Left_Ventricle:Liver:Spleen:GM12878:IMR90:Mesenchymal_Stem_Cell:Mesendoderm:Neural_Progenitor_Cell:Trophoblast-like_Cell:hESC	2.1e-08	rs11681659	7
ENSG00000144229	THSD7B	2	137523115	138435287	1	protein_coding	80731	THSD7B	5.65285e-06	NA	0	0	0	NA	NA	NA	NA	Yes	Mesendoderm:hESC	6.4e-08	rs11681659	7
ENSG00000150540	HNMT	2	138721590	138773930	1	protein_coding	3176	HNMT	0.0967294	0.562236	0	0	0	NA	NA	NA	NA	Yes	Mesenchymal_Stem_Cell	6.4e-08	rs11681659	7
ENSG00000144227	NXPH2	2	139428342	139537918	-1	protein_coding	11249	NXPH2	0.798014	NA	0	0	0	NA	NA	NA	NA	Yes	Mesenchymal_Stem_Cell	6.4e-08	rs11681659	7
ENSG00000226894	TMPRSS11BNL	4	69054242	69083798	-1	protein_coding	401136	TMPRSS11BNL	0.315777	0.704295	0	0	0	NA	NA	NA	NA	Yes	Mesenchymal_Stem_Cell:Mesendoderm:hESC	3.8e-21	rs2603187:rs34327193:rs9884390;rs2123886:rs2123886:rs9884390:rs1377869:rs4860309:rs34103191:rs4860987:rs4860987;4:69447407_GT_G:rs368166328:rs748167110:rs4443356:rs2331416	8
ENSG00000185873	TMPRSS11B	4	69092371	69111438	-1	protein_coding	132724	TMPRSS11B	1.6805e-11	0.053189	0	0	0	NA	NA	NA	NA	Yes	Mesenchymal_Stem_Cell:Mesendoderm:hESC	3.8e-21	rs2603187:rs34327193:rs9884390;rs2123886:rs2123886:rs9884390:rs1377869:rs4860309:rs34103191:rs4860987:rs4860987;4:69447407_GT_G:rs368166328:rs748167110:rs4443356:rs2331416	8
ENSG00000083896	YTHDC1	4	69176105	69215807	-1	protein_coding	91746	YTHDC1	1	-1.32407	0	0	0	NA	NA	NA	NA	Yes	Mesenchymal_Stem_Cell	1.9e-16	rs2603187:rs34327193:rs9884390;rs2123886:rs2123886:rs9884390:rs1377869:rs4860309:rs34103191	8
ENSG00000087128	TMPRSS11E	4	69313167	69363322	1	protein_coding	28983	TMPRSS11E	3.75424e-05	0.26254	118	22.5	0	NA	NA	NA	NA	Yes	Mesenchymal_Stem_Cell:Mesendoderm:hESC	1.9e-16	rs34327193;rs2603187;rs1377869;rs4860309;rs9884390;rs2123886;rs34103191;rs2603152;rs2603187:rs34327193:rs9884390;rs2123886:rs2123886:rs9884390:rs1377869:rs4860309:rs34103191	8
ENSG00000197888	UGT2B17	4	69402902	69434245	-1	protein_coding	7367	UGT2B17	0.0102556	0.903832	94	9.889	118	2.78097e-19	5.32642e-14	GTEx/v8/Liver:GTEx/v8/Pancreas	+	Yes	Liver	3.8e-21	rs9884390;rs4860951;rs13138417;rs113786911;rs9312195;rs531187399;rs4860309;rs4860987;4:69447407_GT_G;rs62317004;rs13101504;rs34327193;rs2603187;rs2123886;rs1377869;rs34103191;rs4443356;rs2331416;rs4860987:rs4860309:rs4860987;4:69447407_GT_G:rs368166328:rs748167110:rs34103191:rs4443356:rs2331416	8
ENSG00000196620	UGT2B15	4	69512348	69536346	-1	protein_coding	7366	UGT2B15	1.92099e-10	0.67733	0	0	0	NA	NA	NA	NA	Yes	Liver	1.2e-16	rs9884390;rs13138417;rs113786911:rs531187399:rs9884390;rs113786911:rs113786911:rs4860309:rs9884390;rs113786911;rs9312195:rs4860987;4:69447407_GT_G;rs4860951;rs62317004;rs13101504:4:69447407_GT_G;rs62317004:rs62317004:4:69447407_GT_G;rs13101504:rs4860987;rs13101504	8
ENSG00000109181	UGT2B10	4	69681711	69696914	1	protein_coding	7365	UGT2B10	5.50616e-15	NA	0	0	0	NA	NA	NA	NA	Yes	Left_Ventricle:Liver:Mesenchymal_Stem_Cell:Mesendoderm:hESC	3.8e-21	rs2603187:rs34327193:rs9884390;rs2123886:rs2123886:rs9884390:rs1377869:rs4860309:rs34103191:rs9884390;rs13138417;rs113786911:rs531187399:rs9884390;rs113786911:rs113786911:rs9884390;rs113786911;rs9312195:rs4860987;4:69447407_GT_G;rs4860951;rs62317004;rs13101504:4:69447407_GT_G;rs62317004:rs62317004:4:69447407_GT_G;rs13101504:rs4860987;rs13101504:rs4860987:rs4860987;4:69447407_GT_G:rs368166328:rs74…	8
ENSG00000135220	UGT2A3	4	69794181	69817509	-1	protein_coding	79799	UGT2A3	5.00169e-06	0.402338	0	0	0	NA	NA	NA	NA	Yes	Left_Ventricle:Mesenchymal_Stem_Cell:Mesendoderm:Trophoblast-like_Cell:hESC	4.9e-18	rs2603187:rs34327193:rs9884390;rs2123886:rs2123886:rs9884390:rs1377869:rs4860309:rs34103191:rs35673206:rs2603152:rs370878539:rs9884390;rs113786911:rs9884390;rs4860951;rs13138417;rs113786911;rs9312195:rs4860951:rs9884390;rs9312195:rs113786911:rs9884390;rs9312195:rs9312195:4:69382399_GTT_G:rs113786911;rs9312195:rs9884390;rs9312195	8
ENSG00000171234	UGT2B7	4	69917081	69978705	1	protein_coding	7364	UGT2B7	3.49679e-08	0.825006	0	0	0	NA	NA	NA	NA	Yes	IMR90:Mesenchymal_Stem_Cell:Mesendoderm:Trophoblast-like_Cell:hESC	3.8e-21	rs2603187:rs34327193:rs9884390;rs2123886:rs2123886:rs9884390:rs1377869:rs4860309:rs34103191:rs2603152:rs370878539:rs9884390;rs113786911:rs9884390;rs4860951;rs13138417;rs113786911;rs9312195:rs4860951:rs9884390;rs9312195:rs113786911:rs9884390;rs9312195:rs9312195:4:69382399_GTT_G:rs113786911;rs9312195:rs9884390;rs9312195:rs35673206:rs4860987:rs4860987;4:69447407_GT_G:rs368166328:rs748167110:rs444335…	8
ENSG00000213759	UGT2B11	4	70065669	70080449	-1	protein_coding	10720	UGT2B11	3.1471e-13	0.706561	0	0	0	NA	NA	NA	NA	Yes	Promoter_anchored_loops:Left_Ventricle:Liver:GM12878:IMR90:Mesenchymal_Stem_Cell:Mesendoderm:Neural_Progenitor_Cell:Trophoblast-like_Cell:hESC	3.8e-21	rs2603187:rs9884390;rs2123886:rs1377869:rs34327193:rs2123886:rs9884390:rs4860309:rs34103191:rs4860987:rs4860987;4:69447407_GT_G:rs368166328:rs748167110:rs4443356:rs2331416:rs35673206:rs2603152:rs370878539:rs9884390;rs113786911:rs9884390;rs4860951;rs13138417;rs113786911;rs9312195:rs4860951:rs9884390;rs9312195:rs113786911:rs9884390;rs9312195:rs9312195:4:69382399_GTT_G:rs113786911;rs9312195:rs988439…	8
ENSG00000135226	UGT2B28	4	70146217	70160768	1	protein_coding	54490	UGT2B28	6.44396e-08	-0.0230075	0	0	0	NA	NA	NA	NA	Yes	Promoter_anchored_loops:Mesenchymal_Stem_Cell:Mesendoderm:hESC	4.9e-18	rs2603187:rs34327193:rs9884390;rs2123886:rs2123886:rs9884390:rs1377869:rs35673206:rs4860309:rs34103191:rs2603152:rs370878539:rs9884390;rs113786911:rs9884390;rs4860951;rs13138417;rs113786911;rs9312195:rs4860951:rs9884390;rs9312195:rs113786911:rs9884390;rs9312195:rs9312195:4:69382399_GTT_G:rs113786911;rs9312195:rs9884390;rs9312195	8
ENSG00000156096	UGT2B4	4	70345883	70391732	-1	protein_coding	7363	UGT2B4	8.44719e-11	0.451804	0	0	0	NA	NA	NA	NA	Yes	IMR90:Mesenchymal_Stem_Cell:hESC	1.9e-16	rs2603187:rs34327193:rs9884390;rs2123886:rs2123886:rs9884390:rs1377869:rs4860309:rs34103191	8
ENSG00000173610	UGT2A1	4	70454135	70518965	-1	protein_coding	10941	UGT2A1	2.73195e-11	-0.281771	0	0	0	NA	NA	NA	NA	Yes	Liver:Mesenchymal_Stem_Cell:Mesendoderm:Neural_Progenitor_Cell:hESC	4.9e-18	rs34103191:rs2603152:rs9884390:rs370878539:rs9884390;rs113786911:rs9884390;rs4860951;rs13138417;rs113786911;rs9312195:rs4860951:rs9884390;rs9312195:rs113786911:rs9884390;rs9312195:rs4860309:rs9312195:4:69382399_GTT_G:rs113786911;rs9312195:rs9884390;rs9312195:rs35673206:rs34327193:rs2603187:rs1377869:rs9884390;rs2123886:rs2123886	8
ENSG00000271271	UGT2A2	4	70454135	70505360	-1	protein_coding	574537	UGT2A2	2.32635e-07	-0.317105	0	0	0	NA	NA	NA	NA	Yes	Liver:Mesenchymal_Stem_Cell:Mesendoderm:Neural_Progenitor_Cell:hESC	4.9e-18	rs34103191:rs2603152:rs9884390:rs370878539:rs9884390;rs113786911:rs9884390;rs4860951;rs13138417;rs113786911;rs9312195:rs4860951:rs9884390;rs9312195:rs113786911:rs9884390;rs9312195:rs4860309:rs9312195:4:69382399_GTT_G:rs113786911;rs9312195:rs9884390;rs9312195:rs35673206:rs34327193:rs2603187:rs1377869:rs9884390;rs2123886:rs2123886	8
ENSG00000270386	UGT2A1	4	70454912	70518967	-1	protein_coding	10941	UGT2A1	NA	-0.281771	0	0	0	NA	NA	NA	NA	Yes	Liver:Mesenchymal_Stem_Cell:Mesendoderm:Neural_Progenitor_Cell:hESC	4.9e-18	rs34103191:rs2603152:rs9884390:rs370878539:rs9884390;rs113786911:rs9884390;rs4860951;rs13138417;rs113786911;rs9312195:rs4860951:rs9884390;rs9312195:rs113786911:rs9884390;rs9312195:rs4860309:rs9312195:4:69382399_GTT_G:rs113786911;rs9312195:rs9884390;rs9312195:rs35673206:rs34327193:rs2603187:rs1377869:rs9884390;rs2123886:rs2123886	8
ENSG00000145808	ADAMTS19	5	128795958	129074376	1	protein_coding	171019	ADAMTS19	0.951959	0.787855	0	0	0	NA	NA	NA	NA	Yes	Mesenchymal_Stem_Cell	0.00019	rs10075801	9
ENSG00000198108	CHSY3	5	129240165	129522327	1	protein_coding	337876	CHSY3	0.0118613	NA	0	0	0	NA	NA	NA	NA	Yes	IMR90:Mesenchymal_Stem_Cell:Mesendoderm	0.00019	rs10075801	9
ENSG00000169567	HINT1	5	130494720	130507428	-1	protein_coding	3094	HINT1	0.0842645	-0.379107	0	0	11	5.47708e-05	4.93674e-09	GTEx/v8/Heart_Left_Ventricle	-	No	NA	0.00019	rs10075801	9
ENSG00000158985	CDC42SE2	5	130581186	130734140	1	protein_coding	56990	CDC42SE2	0.753729	-0.225977	0	0	0	NA	NA	NA	NA	Yes	Mesenchymal_Stem_Cell	0.00019	rs10075801	9
ENSG00000158987	RAPGEF6	5	130759614	130970929	-1	protein_coding	51735	RAPGEF6	0.998026	-0.743539	0	0	16	0.000110428	5.68575e-08	GTEx/v8/Artery_Aorta:GTEx/v8/Artery_Tibial	-	Yes	GM12878:IMR90:Mesenchymal_Stem_Cell:Mesendoderm:Trophoblast-like_Cell:hESC	1.8e-07	5:131664516_TTATATA_T;rs10075801	9
ENSG00000273217	CTC-432M15.3	5	130761584	131132676	-1	protein_coding	NA	NA	0.996763	NA	0	0	0	NA	NA	NA	NA	Yes	Promoter_anchored_loops:IMR90:Mesenchymal_Stem_Cell:Mesendoderm	0.00019	rs10075801	9
ENSG00000217128	FNIP1	5	130977407	131132710	-1	protein_coding	96459	FNIP1	0.999819	-0.514581	0	0	0	NA	NA	NA	NA	Yes	Promoter_anchored_loops:IMR90:Mesenchymal_Stem_Cell:Mesendoderm	0.00019	rs10075801	9
ENSG00000164398	ACSL6	5	131142683	131347936	-1	protein_coding	23305	ACSL6	0.0885623	-1.29258	5	10.21	41	1.01404e-05	0.000573997	GTEx/v8/Pancreas	+	Yes	EP_correlation_cell_type_oneway:IMR90:Mesendoderm	1.7e-10	rs10075801;5:131664516_TTATATA_T;rs10075801:5:131664516_TTATATA_T;rs200800380:5:131664516_TTATATA_T:5:131664516_TTATATA_T;rs10075801:rs200800380	9
ENSG00000164399	IL3	5	131396222	131398897	1	protein_coding	3562	IL3	3.72136e-09	-0.398765	7	14.89	0	NA	NA	NA	NA	Yes	EP_correlation_cell_type_oneway:Spleen:IMR90:Mesendoderm	0.00019	rs10075801	9
ENSG00000164400	CSF2	5	131409483	131411859	1	protein_coding	1437	CSF2	0.803849	-0.384982	10	14.89	0	NA	NA	NA	NA	Yes	EP_correlation_cell_type_oneway:GM12878:IMR90:Mesendoderm	1.7e-10	rs10075801;rs10075801:5:131664516_TTATATA_T:5:131664516_TTATATA_T;rs200800380:5:131664516_TTATATA_T;rs10075801:rs200800380	9
ENSG00000072682	P4HA2	5	131527531	131631008	-1	protein_coding	8974	P4HA2	6.46128e-05	-0.308598	58	18.28	223	2.48276e-38	2.11549e-31	GTEx/v8/Artery_Aorta:GTEx/v8/Artery_Coronary:GTEx/v8/Artery_Tibial:GTEx/v8/Heart_Atrial_Appendage:GTEx/v8/Pancreas	+	Yes	IMR90:Mesenchymal_Stem_Cell:Trophoblast-like_Cell	1.7e-10	rs10075801;5:131664516_TTATATA_T;rs200800380;rs10075801:5:131664516_TTATATA_T:5:131664516_TTATATA_T;rs200800380:5:131664516_TTATATA_T;rs10075801:rs200800380	9
ENSG00000131435	PDLIM4	5	131593364	131609147	1	protein_coding	8572	PDLIM4	0.924089	-0.0661677	27	18.28	223	2.42795e-21	6.02052e-16	GTEx/v8/Adipose_Subcutaneous:GTEx/v8/Adipose_Visceral_Omentum:GTEx/v8/Heart_Left_Ventricle:GTEx/v8/Pancreas	-	Yes	Adult_Cortex:Fetal_Cortex:GM12878:IMR90:Mesenchymal_Stem_Cell:Mesendoderm:Trophoblast-like_Cell:hESC	1.7e-10	rs10075801;5:131664516_TTATATA_T;rs200800380;rs200800380:5:131664516_TTATATA_T:5:131664516_TTATATA_T;rs10075801:rs10075801:rs200800380	9
ENSG00000197208	SLC22A4	5	131630136	131679899	1	protein_coding	6583	SLC22A4	4.64079e-06	-0.515619	90	13.88	223	2.7801e-09	6.7175e-07	GTEx/v8/Artery_Aorta	+	Yes	Adult_Cortex:Fetal_Cortex:IMR90:Mesenchymal_Stem_Cell:Trophoblast-like_Cell	1.7e-10	rs10075801;5:131664516_TTATATA_T;rs200800380;rs200800380:5:131664516_TTATATA_T:5:131664516_TTATATA_T;rs10075801:rs10075801:rs200800380	9
ENSG00000197375	SLC22A5	5	131705444	131731306	1	protein_coding	6584	SLC22A5	4.9e-09	0.858089	63	21.7	223	1.27641e-27	6.23252e-22	GTEx/v8/Adipose_Subcutaneous:GTEx/v8/Adipose_Visceral_Omentum:GTEx/v8/Artery_Aorta:GTEx/v8/Artery_Coronary:GTEx/v8/Artery_Tibial:GTEx/v8/Pancreas	-	Yes	Adult_Cortex:Fetal_Cortex:Left_Ventricle:GM12878:IMR90:Mesenchymal_Stem_Cell:Mesendoderm:Trophoblast-like_Cell:hESC	1.7e-10	5:131664516_TTATATA_T;rs200800380;rs10075801;rs200800380:5:131664516_TTATATA_T:5:131664516_TTATATA_T;rs10075801:rs10075801:rs200800380	9
ENSG00000197536	C5orf56	5	131746328	131811736	1	protein_coding	441108	C5orf56	0.107649	NA	18	9.904	131	9.70217e-11	3.3657e-48	GTEx/v8/Adipose_Subcutaneous:GTEx/v8/Artery_Aorta:GTEx/v8/Artery_Tibial:GTEx/v8/Heart_Atrial_Appendage	+	Yes	Adult_Cortex:Left_Ventricle:Liver:Psoas:Spleen:GM12878:IMR90:Mesenchymal_Stem_Cell:Mesendoderm:Trophoblast-like_Cell:hESC	1.7e-10	rs10075801;5:131664516_TTATATA_T;rs200800380;rs200800380:5:131664516_TTATATA_T:5:131664516_TTATATA_T;rs10075801:rs10075801:rs200800380	9
ENSG00000125347	IRF1	5	131817301	131826490	-1	protein_coding	3659	IRF1	0.867789	0.555445	1	4.69	0	NA	NA	NA	NA	Yes	Promoter_anchored_loops:Adult_Cortex:Fetal_Cortex:Left_Ventricle:Liver:Psoas:Spleen:GM12878:IMR90:Mesenchymal_Stem_Cell:Mesendoderm:Trophoblast-like_Cell:hESC	1.7e-10	rs10075801;5:131664516_TTATATA_T:5:131664516_TTATATA_T;rs10075801:5:131664516_TTATATA_T;rs200800380:rs10075801:rs200800380	9
ENSG00000113525	IL5	5	131877136	131892530	-1	protein_coding	3567	IL5	0.0283744	-0.161789	0	0	0	NA	NA	NA	NA	Yes	Adult_Cortex:Liver:GM12878:IMR90:Mesenchymal_Stem_Cell:Mesendoderm:Trophoblast-like_Cell:hESC	1.7e-10	5:131664516_TTATATA_T;rs200800380:5:131664516_TTATATA_T:5:131664516_TTATATA_T;rs10075801:rs10075801:rs200800380	9
ENSG00000113522	RAD50	5	131891711	131980313	1	protein_coding	10111	RAD50	3.45028e-15	-1.01827	0	0	0	NA	NA	NA	NA	Yes	Adult_Cortex:Liver:GM12878:IMR90:Mesenchymal_Stem_Cell:Mesendoderm:Trophoblast-like_Cell:hESC	1.7e-10	5:131664516_TTATATA_T;rs200800380:5:131664516_TTATATA_T:5:131664516_TTATATA_T;rs10075801:rs10075801:rs200800380	9
ENSG00000169194	IL13	5	131991955	131996802	1	protein_coding	3596	IL13	0.0257147	0.123554	0	0	0	NA	NA	NA	NA	Yes	Fetal_Cortex:GM12878:IMR90:Mesenchymal_Stem_Cell	1.7e-10	5:131664516_TTATATA_T;rs200800380:5:131664516_TTATATA_T:5:131664516_TTATATA_T;rs10075801:rs10075801:rs200800380	9
ENSG00000113520	IL4	5	132009678	132018368	1	protein_coding	3565	IL4	0.168021	-0.00419523	0	0	0	NA	NA	NA	NA	Yes	Liver:GM12878:IMR90:Mesenchymal_Stem_Cell:Mesendoderm:Trophoblast-like_Cell:hESC	1.7e-10	5:131664516_TTATATA_T;rs200800380:5:131664516_TTATATA_T:5:131664516_TTATATA_T;rs10075801:rs10075801:rs200800380	9
ENSG00000131437	KIF3A	5	132028320	132073330	-1	protein_coding	11127	KIF3A	0.992416	-0.460356	0	0	36	8.42388e-06	1.44548e-23	GTEx/v8/Artery_Tibial	+	Yes	Liver:GM12878:IMR90:Mesenchymal_Stem_Cell:Mesendoderm	1.7e-10	rs10075801;5:131664516_TTATATA_T;rs200800380:5:131664516_TTATATA_T:5:131664516_TTATATA_T;rs10075801:rs10075801:rs200800380	9
ENSG00000205089	CCNI2	5	132083137	132089856	1	protein_coding	645121	CCNI2	4.53255e-05	0.828805	0	0	0	NA	NA	NA	NA	Yes	Adult_Cortex:Fetal_Cortex:Left_Ventricle:Liver:Spleen:GM12878:IMR90:Mesenchymal_Stem_Cell:Mesendoderm:Trophoblast-like_Cell:hESC	1.7e-10	5:131664516_TTATATA_T;rs200800380:5:131664516_TTATATA_T:5:131664516_TTATATA_T;rs10075801:rs10075801:rs200800380	9
ENSG00000164402	2008-09-01	5	132086509	132142933	-1	protein_coding	23176	2008-09-01	0.954286	NA	0	0	0	NA	NA	NA	NA	Yes	Adult_Cortex:Fetal_Cortex:Left_Ventricle:Liver:Spleen:GM12878:IMR90:Mesenchymal_Stem_Cell:Mesendoderm:Trophoblast-like_Cell:hESC	1.7e-10	5:131664516_TTATATA_T;rs200800380:5:131664516_TTATATA_T:5:131664516_TTATATA_T;rs10075801:rs10075801:rs200800380	9
ENSG00000198944	SOWAHA	5	132149033	132152488	1	protein_coding	134548	SOWAHA	NA	0.0656482	0	0	0	NA	NA	NA	NA	Yes	Adult_Cortex:Fetal_Cortex:Left_Ventricle:Liver:Spleen:GM12878:IMR90:Mesenchymal_Stem_Cell:Mesendoderm:Trophoblast-like_Cell:hESC	1.7e-10	5:131664516_TTATATA_T;rs200800380:5:131664516_TTATATA_T:5:131664516_TTATATA_T;rs10075801:rs10075801:rs200800380	9
ENSG00000164403	SHROOM1	5	132157833	132166590	-1	protein_coding	134549	SHROOM1	0.00959555	-0.760291	0	0	0	NA	NA	NA	NA	Yes	Promoter_anchored_loops:GM12878:IMR90:Mesenchymal_Stem_Cell:Mesendoderm	1.7e-10	5:131664516_TTATATA_T:5:131664516_TTATATA_T;rs200800380:rs200800380:5:131664516_TTATATA_T;rs10075801:rs10075801	9
ENSG00000164404	GDF9	5	132196873	132202576	-1	protein_coding	2661	GDF9	1.19472e-05	0.352488	0	0	0	NA	NA	NA	NA	Yes	Fetal_Cortex:Aorta:Hippocampus:Left_Ventricle:Liver:Right_Ventricle:Spleen:GM12878:IMR90:Mesenchymal_Stem_Cell:Mesendoderm:Trophoblast-like_Cell:hESC	1.7e-10	5:131664516_TTATATA_T;rs200800380:5:131664516_TTATATA_T:5:131664516_TTATATA_T;rs10075801:rs10075801:rs200800380	9
ENSG00000164405	UQCRQ	5	132202252	132203723	1	protein_coding	27089	UQCRQ	0.091913	-0.564493	0	0	0	NA	NA	NA	NA	Yes	Fetal_Cortex:Aorta:Hippocampus:Left_Ventricle:Liver:Right_Ventricle:Spleen:GM12878:IMR90:Mesenchymal_Stem_Cell:Mesendoderm:Trophoblast-like_Cell:hESC	1.7e-10	5:131664516_TTATATA_T;rs200800380:5:131664516_TTATATA_T:5:131664516_TTATATA_T;rs10075801:rs10075801:rs200800380	9
ENSG00000164406	LEAP2	5	132208014	132210738	1	protein_coding	116842	LEAP2	0.00789838	1.43845	0	0	0	NA	NA	NA	NA	Yes	Fetal_Cortex:Aorta:Hippocampus:Left_Ventricle:Liver:Right_Ventricle:Spleen:GM12878:IMR90:Mesenchymal_Stem_Cell:Mesendoderm:Trophoblast-like_Cell:hESC	1.7e-10	5:131664516_TTATATA_T;rs200800380:5:131664516_TTATATA_T:5:131664516_TTATATA_T;rs10075801:rs10075801:rs200800380	9
ENSG00000072364	AFF4	5	132211071	132299326	-1	protein_coding	27125	AFF4	0.999997	-1.86132	0	0	0	NA	NA	NA	NA	Yes	Adult_Cortex:Fetal_Cortex:GM12878:Mesenchymal_Stem_Cell	1.7e-10	5:131664516_TTATATA_T;rs200800380:5:131664516_TTATATA_T:5:131664516_TTATATA_T;rs10075801:rs10075801:rs200800380	9
ENSG00000155329	ZCCHC10	5	132332677	132362296	-1	protein_coding	54819	ZCCHC10	0.160802	-0.20978	0	0	0	NA	NA	NA	NA	Yes	Promoter_anchored_loops:Adult_Cortex:Fetal_Cortex:GM12878	1.3e-08	rs10075801:5:131664516_TTATATA_T;rs200800380:5:131664516_TTATATA_T:5:131664516_TTATATA_T;rs10075801	9
ENSG00000170606	HSPA4	5	132387654	132442141	1	protein_coding	3308	HSPA4	0.999958	-0.0696306	0	0	0	NA	NA	NA	NA	Yes	Adult_Cortex:Fetal_Cortex:GM12878	1.3e-08	5:131664516_TTATATA_T;rs200800380:5:131664516_TTATATA_T:5:131664516_TTATATA_T;rs10075801:rs10075801	9
ENSG00000213585	VDAC1	5	133307606	133340824	-1	protein_coding	7416	VDAC1	0.975595	-0.32609	0	0	0	NA	NA	NA	NA	Yes	Mesenchymal_Stem_Cell	1.7e-10	rs10075801:5:131664516_TTATATA_T;rs200800380:5:131664516_TTATATA_T:5:131664516_TTATATA_T;rs10075801:rs200800380	9
ENSG00000113558	SKP1	5	133484633	133512729	-1	protein_coding	6500	SKP1	0.224831	2.13201	0	0	0	NA	NA	NA	NA	Yes	Mesenchymal_Stem_Cell	1.7e-10	rs10075801:5:131664516_TTATATA_T;rs200800380:5:131664516_TTATATA_T:5:131664516_TTATATA_T;rs10075801:rs200800380	9
ENSG00000082516	GEMIN5	5	154266976	154317769	-1	protein_coding	25929	GEMIN5	3.1342e-14	-0.69306	0	0	0	NA	NA	NA	NA	Yes	Mesenchymal_Stem_Cell	7e-12	rs4704728:rs6882345:rs4704835:5:156392653_CA_C	10
ENSG00000082515	MRPL22	5	154320630	154348971	1	protein_coding	29093	MRPL22	3.44168e-07	0.276799	0	0	0	NA	NA	NA	NA	Yes	IMR90:Mesenchymal_Stem_Cell:Mesendoderm:hESC	7e-12	rs4704728:rs6882345:rs4704835:5:156392653_CA_C	10
ENSG00000170624	SGCD	5	155297354	156194799	1	protein_coding	6444	SGCD	0.0023391	0.319696	0	0	0	NA	NA	NA	NA	Yes	IMR90:Mesenchymal_Stem_Cell:Mesendoderm:hESC	7e-12	rs4704728:rs6882345:rs4704835:5:156392653_CA_C:rs760614621	10
ENSG00000145850	TIMD4	5	156346293	156390266	-1	protein_coding	91937	TIMD4	4.33747e-08	0.360935	29	10.22	39	6.1249e-06	0.0123016	GTEx/v8/Adipose_Subcutaneous:GTEx/v8/Heart_Atrial_Appendage	-	Yes	Promoter_anchored_loops	7e-12	rs4704728;rs6882345;rs4704835;5:156392653_CA_C;rs4704835:rs4704728	10
ENSG00000113249	HAVCR1	5	156456424	156486130	-1	protein_coding	26762	HAVCR1	0.00305434	-0.160669	55	9.969	131	2.75285e-18	5.93632e-22	GTEx/v8/Adipose_Subcutaneous:GTEx/v8/Adipose_Visceral_Omentum:GTEx/v8/Artery_Coronary	+	Yes	Promoter_anchored_loops	7e-12	rs4704835;rs4704728;rs6882345;rs4704728:rs4704835	10
ENSG00000135077	HAVCR2	5	156512843	156569880	-1	protein_coding	84868	HAVCR2	0.111384	0.941	0	0	23	5.31832e-05	0.000319789	GTEx/v8/Artery_Aorta	-	No	NA	7.5e-09	rs4704835	10
ENSG00000113272	THG1L	5	157158205	157168456	1	protein_coding	54974	THG1L	3.48304e-05	1.45141	0	0	1	0.000192414	3.05013e-08	GTEx/v8/Artery_Tibial	-	No	NA	1.2e-06	rs4704835	10
ENSG00000079689	SCGN	6	25652464	25702011	1	protein_coding	10590	SCGN	0.035946	0.102936	0	0	0	NA	NA	NA	NA	Yes	Left_Ventricle:IMR90:Mesenchymal_Stem_Cell	3.3e-06	rs147662640	11
ENSG00000124568	SLC17A1	6	25783125	25832287	-1	protein_coding	6568	SLC17A1	2.59261e-10	-0.181263	0	0	0	NA	NA	NA	NA	Yes	Left_Ventricle:IMR90:Mesenchymal_Stem_Cell	6e-08	rs147662640:rs9257779	11
ENSG00000124564	SLC17A3	6	25833294	25882514	-1	protein_coding	10786	SLC17A3	9.88206e-14	-0.246503	0	0	0	NA	NA	NA	NA	Yes	Left_Ventricle:IMR90:Mesenchymal_Stem_Cell	6e-08	rs9257779;rs147662640:rs147662640:rs9257779	11
ENSG00000112337	SLC17A2	6	25912982	25930946	-1	protein_coding	10246	SLC17A2	0.00466985	-0.129201	0	0	0	NA	NA	NA	NA	Yes	Left_Ventricle:IMR90:Mesenchymal_Stem_Cell	3.2e-08	rs147662640:rs9257779;rs147662640:rs9257779:rs567880264	11
ENSG00000112343	TRIM38	6	25963030	25987384	1	protein_coding	10475	TRIM38	4.7513e-06	-0.220583	0	0	0	NA	NA	NA	NA	Yes	IMR90:Mesenchymal_Stem_Cell	4.2e-07	rs147662640:rs9257779;rs147662640	11
ENSG00000124610	HIST1H1A	6	26017260	26018040	-1	protein_coding	3024	HIST1H1A	0.0035308	-0.372207	0	0	0	NA	NA	NA	NA	Yes	Aorta:Left_Ventricle:Liver:Spleen:GM12878:IMR90:Mesenchymal_Stem_Cell:Mesendoderm:Neural_Progenitor_Cell:Trophoblast-like_Cell:hESC	3.9e-08	rs147662640:rs9257779;rs147662640	11
ENSG00000198366	HIST1H3A	6	26020718	26021186	1	protein_coding	8350	HIST1H3A	3.98008e-05	-0.225707	0	0	0	NA	NA	NA	NA	Yes	Adult_Cortex:Fetal_Cortex:Aorta:Left_Ventricle:Liver:Spleen:GM12878:IMR90:Mesenchymal_Stem_Cell:Mesendoderm:Neural_Progenitor_Cell:Trophoblast-like_Cell:hESC	3.9e-08	rs147662640:rs9257779;rs147662640	11
ENSG00000196176	HIST1H4A	6	26021907	26022278	1	protein_coding	8359	HIST1H4A	0.0022854	0.43417	0	0	0	NA	NA	NA	NA	Yes	Adult_Cortex:Fetal_Cortex:Aorta:Left_Ventricle:Liver:Spleen:GM12878:IMR90:Mesenchymal_Stem_Cell:Mesendoderm:Neural_Progenitor_Cell:Trophoblast-like_Cell:hESC	3.9e-08	rs147662640:rs9257779;rs147662640	11
ENSG00000124529	HIST1H4B	6	26027124	26027480	-1	protein_coding	8366	HIST1H4B	0.00854183	0.166119	0	0	0	NA	NA	NA	NA	Yes	Adult_Cortex:Fetal_Cortex:Aorta:Left_Ventricle:Liver:Spleen:GM12878:IMR90:Mesenchymal_Stem_Cell:Mesendoderm:Neural_Progenitor_Cell:Trophoblast-like_Cell:hESC	3.9e-08	rs147662640:rs9257779;rs147662640	11
ENSG00000124693	HIST1H3B	6	26031817	26032288	-1	protein_coding	8358	HIST1H3B	0.307283	0.251696	0	0	0	NA	NA	NA	NA	Yes	Adult_Cortex:Fetal_Cortex:Aorta:Left_Ventricle:Liver:Spleen:GM12878:IMR90:Mesenchymal_Stem_Cell:Mesendoderm:Neural_Progenitor_Cell:Trophoblast-like_Cell:hESC	3.9e-08	rs147662640:rs9257779;rs147662640	11
ENSG00000137259	HIST1H2AB	6	26033320	26033796	-1	protein_coding	8335	HIST1H2AB	0.00531944	0.228135	0	0	0	NA	NA	NA	NA	Yes	Adult_Cortex:Fetal_Cortex:Aorta:Left_Ventricle:Liver:Spleen:GM12878:IMR90:Mesenchymal_Stem_Cell:Mesendoderm:Neural_Progenitor_Cell:Trophoblast-like_Cell:hESC	3.9e-08	rs147662640:rs9257779;rs147662640	11
ENSG00000196226	HIST1H2BB	6	26043455	26043885	-1	protein_coding	3018	HIST1H2BB	0.130328	0.288117	0	0	0	NA	NA	NA	NA	Yes	IMR90	1.7e-05	rs147662640	11
ENSG00000196532	HIST1H3C	6	26045639	26046097	1	protein_coding	8352	HIST1H3C	0.215541	-0.193879	0	0	0	NA	NA	NA	NA	Yes	IMR90	1.7e-05	rs147662640	11
ENSG00000187837	HIST1H1C	6	26055968	26056699	-1	protein_coding	3006	HIST1H1C	NA	0.137228	0	0	0	NA	NA	NA	NA	Yes	Fetal_Cortex:IMR90	1.7e-05	rs147662640	11
ENSG00000010704	HFE	6	26087509	26098571	1	protein_coding	3077	HFE	8.49697e-07	0.210172	0	0	0	NA	NA	NA	NA	Yes	Aorta:Left_Ventricle:Liver:Spleen:GM12878:IMR90:Mesenchymal_Stem_Cell:Neural_Progenitor_Cell	3.9e-08	rs147662640:rs9257779;rs147662640	11
ENSG00000197061	HIST1H4C	6	26104104	26104518	1	protein_coding	8364	HIST1H4C	8.85617e-05	0.852192	0	0	0	NA	NA	NA	NA	Yes	Fetal_Cortex:Aorta:Left_Ventricle:Liver:Spleen:GM12878:IMR90:Mesenchymal_Stem_Cell:Neural_Progenitor_Cell	3.9e-08	rs147662640:rs9257779;rs147662640	11
ENSG00000187475	HIST1H1T	6	26107640	26108364	-1	protein_coding	3010	HIST1H1T	NA	-0.0680391	0	0	0	NA	NA	NA	NA	Yes	Fetal_Cortex:Aorta:Left_Ventricle:Liver:Spleen:GM12878:IMR90:Mesenchymal_Stem_Cell:Neural_Progenitor_Cell	3.9e-08	rs147662640:rs9257779;rs147662640	11
ENSG00000197697	HIST1H2BE	6	26183958	26184454	1	protein_coding	8344	HIST1H2BE	0.000307872	0.445738	0	0	0	NA	NA	NA	NA	Yes	Adult_Cortex:Fetal_Cortex:Left_Ventricle:Liver:Spleen:GM12878:IMR90:Mesenchymal_Stem_Cell:Neural_Progenitor_Cell:Trophoblast-like_Cell:hESC	1.7e-05	rs147662640	11
ENSG00000188987	HIST1H4D	6	26188938	26189304	-1	protein_coding	8360	HIST1H4D	0.0022643	0.870145	0	0	0	NA	NA	NA	NA	Yes	Adult_Cortex:Fetal_Cortex:Left_Ventricle:Liver:Spleen:GM12878:IMR90:Mesenchymal_Stem_Cell:Neural_Progenitor_Cell:Trophoblast-like_Cell:hESC	1.7e-05	rs147662640	11
ENSG00000197409	HIST1H3D	6	26197068	26199521	-1	protein_coding	8351	HIST1H3D	0.0111951	NA	0	0	0	NA	NA	NA	NA	Yes	Adult_Cortex:Fetal_Cortex:Left_Ventricle:Liver:Spleen:GM12878:IMR90:Mesenchymal_Stem_Cell:Neural_Progenitor_Cell:Trophoblast-like_Cell:hESC	1.7e-05	rs147662640	11
ENSG00000196866	HIST1H2AD	6	26199079	26199471	-1	protein_coding	3013	HIST1H2AD	3.99677e-05	0.287759	0	0	0	NA	NA	NA	NA	Yes	Adult_Cortex:Fetal_Cortex:Left_Ventricle:Liver:Spleen:GM12878:IMR90:Mesenchymal_Stem_Cell:Neural_Progenitor_Cell:Trophoblast-like_Cell:hESC	1.7e-05	rs147662640	11
ENSG00000197846	HIST1H2BF	6	26199748	26200942	1	protein_coding	8343	HIST1H2BF	0.00030002	0.851063	0	0	0	NA	NA	NA	NA	Yes	Adult_Cortex:Fetal_Cortex:Left_Ventricle:Liver:Spleen:GM12878:IMR90:Mesenchymal_Stem_Cell:Mesendoderm:Neural_Progenitor_Cell:Trophoblast-like_Cell:hESC	1.7e-05	rs147662640	11
ENSG00000198518	HIST1H4E	6	26204858	26206266	1	protein_coding	8367	HIST1H4E	0.000642251	1.83578	0	0	0	NA	NA	NA	NA	Yes	Adult_Cortex:Fetal_Cortex:Left_Ventricle:Liver:Spleen:GM12878:IMR90:Mesenchymal_Stem_Cell:Mesendoderm:Neural_Progenitor_Cell:Trophoblast-like_Cell:hESC	1.7e-05	rs147662640	11
ENSG00000187990	HIST1H2BG	6	26216428	26216872	-1	protein_coding	8339	HIST1H2BG	2.94452e-06	0.0253452	0	0	0	NA	NA	NA	NA	Yes	Adult_Cortex:Fetal_Cortex:Left_Ventricle:Liver:Spleen:GM12878:IMR90:Mesenchymal_Stem_Cell:Mesendoderm:Neural_Progenitor_Cell:Trophoblast-like_Cell:hESC	1.7e-05	rs147662640	11
ENSG00000168274	HIST1H2AE	6	26217165	26217711	1	protein_coding	3012	HIST1H2AE	0.624124	-0.273878	0	0	0	NA	NA	NA	NA	Yes	Adult_Cortex:Fetal_Cortex:Left_Ventricle:Liver:Spleen:GM12878:IMR90:Mesenchymal_Stem_Cell:Mesendoderm:Neural_Progenitor_Cell:Trophoblast-like_Cell:hESC	1.7e-05	rs147662640	11
ENSG00000196966	HIST1H3E	6	26225383	26225844	1	protein_coding	8353	HIST1H3E	0.000813429	-0.209795	0	0	0	NA	NA	NA	NA	Yes	Adult_Cortex:Fetal_Cortex:Left_Ventricle:Liver:Spleen:GM12878:IMR90:Mesenchymal_Stem_Cell:Mesendoderm:Neural_Progenitor_Cell:Trophoblast-like_Cell:hESC	1.7e-05	rs147662640	11
ENSG00000124575	HIST1H1D	6	26234440	26235216	-1	protein_coding	3007	HIST1H1D	NA	0.136123	0	0	0	NA	NA	NA	NA	Yes	Adult_Cortex:Fetal_Cortex:Left_Ventricle:Liver:Spleen:GM12878:IMR90:Mesenchymal_Stem_Cell:Mesendoderm:Neural_Progenitor_Cell:Trophoblast-like_Cell:hESC	1.7e-05	rs147662640	11
ENSG00000198327	HIST1H4F	6	26240561	26240976	1	protein_coding	8361	HIST1H4F	0.181985	1.06312	0	0	0	NA	NA	NA	NA	Yes	Adult_Cortex:Fetal_Cortex:Left_Ventricle:Liver:Spleen:GM12878:IMR90:Mesenchymal_Stem_Cell:Mesendoderm:Neural_Progenitor_Cell:Trophoblast-like_Cell:hESC	1.4e-05	rs147662640	11
ENSG00000124578	HIST1H4G	6	26246886	26247259	-1	protein_coding	8369	HIST1H4G	0.00263	-0.0509409	0	0	0	NA	NA	NA	NA	Yes	Adult_Cortex:Fetal_Cortex:Left_Ventricle:Liver:Spleen:GM12878:IMR90:Mesenchymal_Stem_Cell:Mesendoderm:Neural_Progenitor_Cell:Trophoblast-like_Cell:hESC	1.4e-05	rs147662640	11
ENSG00000256316	HIST1H3F	6	26250370	26250835	-1	protein_coding	8968	HIST1H3F	0.0422154	-0.181854	0	0	0	NA	NA	NA	NA	Yes	Adult_Cortex:Fetal_Cortex:Left_Ventricle:Liver:Spleen:GM12878:IMR90:Mesenchymal_Stem_Cell:Mesendoderm:Neural_Progenitor_Cell:Trophoblast-like_Cell:hESC	1.4e-05	rs147662640	11
ENSG00000197459	HIST1H2BH	6	26251879	26252303	1	protein_coding	8345	HIST1H2BH	0.00029573	-0.173874	0	0	0	NA	NA	NA	NA	Yes	Adult_Cortex:Fetal_Cortex:Left_Ventricle:Liver:Spleen:GM12878:IMR90:Mesenchymal_Stem_Cell:Mesendoderm:Neural_Progenitor_Cell:Trophoblast-like_Cell:hESC	1.4e-05	rs147662640	11
ENSG00000256018	HIST1H3G	6	26271146	26271612	-1	protein_coding	8355	HIST1H3G	1.71006e-05	0.23442	0	0	0	NA	NA	NA	NA	Yes	Fetal_Cortex:Left_Ventricle:Liver:Spleen:GM12878:IMR90:Mesenchymal_Stem_Cell:Mesendoderm:Neural_Progenitor_Cell:Trophoblast-like_Cell:hESC	1.4e-05	rs147662640	11
ENSG00000168242	HIST1H2BI	6	26273144	26273622	1	protein_coding	8346	HIST1H2BI	0.138012	-0.249748	0	0	0	NA	NA	NA	NA	Yes	Fetal_Cortex:Left_Ventricle:Liver:Spleen:GM12878:IMR90:Mesenchymal_Stem_Cell:Mesendoderm:Neural_Progenitor_Cell:Trophoblast-like_Cell:hESC	1.4e-05	rs147662640	11
ENSG00000158406	HIST1H4H	6	26281283	26285762	-1	protein_coding	8365	HIST1H4H	0.00879033	1.05907	0	0	0	NA	NA	NA	NA	Yes	Adult_Cortex:Fetal_Cortex:Aorta:Left_Ventricle:Liver:GM12878:IMR90:Mesenchymal_Stem_Cell:Neural_Progenitor_Cell:Trophoblast-like_Cell:hESC	6.1e-07	rs147662640:rs9257779;rs147662640	11
ENSG00000186470	BTN3A2	6	26365387	26378546	1	protein_coding	11118	BTN3A2	0.000124519	2.20791	0	0	0	NA	NA	NA	NA	Yes	Adult_Cortex:Fetal_Cortex:Left_Ventricle:IMR90	1.7e-05	rs147662640	11
ENSG00000124508	BTN2A2	6	26383324	26395102	1	protein_coding	10385	BTN2A2	0.000150288	1.01572	0	0	0	NA	NA	NA	NA	Yes	Left_Ventricle:IMR90	1.7e-05	rs147662640	11
ENSG00000026950	BTN3A1	6	26402465	26415444	1	protein_coding	11119	BTN3A1	8.65114e-07	1.62791	0	0	0	NA	NA	NA	NA	Yes	Adult_Cortex:Fetal_Cortex	1.7e-05	rs147662640	11
ENSG00000111801	BTN3A3	6	26440700	26453643	1	protein_coding	10384	BTN3A3	7.19025e-10	1.09011	0	0	0	NA	NA	NA	NA	Yes	IMR90	1.7e-05	rs147662640	11
ENSG00000112763	BTN2A1	6	26458150	26476849	1	protein_coding	11120	BTN2A1	1.07468e-18	0.260571	0	0	0	NA	NA	NA	NA	Yes	IMR90	1.7e-05	rs147662640	11
ENSG00000124557	BTN1A1	6	26501449	26510650	1	protein_coding	696	BTN1A1	1.14088e-09	-0.329705	0	0	0	NA	NA	NA	NA	Yes	IMR90	1.7e-05	rs147662640	11
ENSG00000182952	HMGN4	6	26538633	26546482	1	protein_coding	10473	HMGN4	0.557082	-0.351003	0	0	0	NA	NA	NA	NA	Yes	Left_Ventricle:Liver:IMR90:Mesenchymal_Stem_Cell	3.9e-08	rs147662640:rs9257779;rs147662640	11
ENSG00000146109	ABT1	6	26597180	26600278	1	protein_coding	29777	ABT1	0.0271056	0.104221	0	0	0	NA	NA	NA	NA	Yes	Spleen:IMR90:Mesenchymal_Stem_Cell	3.9e-08	rs147662640:rs9257779;rs147662640	11
ENSG00000181315	ZNF322	6	26636518	26659980	-1	protein_coding	79692	ZNF322	NA	-1.14047	0	0	0	NA	NA	NA	NA	Yes	Adult_Cortex:Fetal_Cortex:Left_Ventricle:IMR90:Mesenchymal_Stem_Cell	4.2e-07	rs147662640:rs9257779;rs147662640	11
ENSG00000124635	HIST1H2BJ	6	27093676	27100541	-1	protein_coding	8970	HIST1H2BJ	0.478842	0.308582	0	0	0	NA	NA	NA	NA	Yes	Promoter_anchored_loops:Adult_Cortex:Fetal_Cortex:Aorta:Bladder:Left_Ventricle:Liver:Spleen:GM12878:IMR90:Mesenchymal_Stem_Cell:Mesendoderm:Neural_Progenitor_Cell:Trophoblast-like_Cell:hESC	3.9e-08	rs147662640:rs9257779	11
ENSG00000196787	HIST1H2AG	6	27100832	27103070	1	protein_coding	8969	HIST1H2AG	0.000610464	-0.741637	0	0	0	NA	NA	NA	NA	Yes	Promoter_anchored_loops:Adult_Cortex:Fetal_Cortex:Aorta:Bladder:Left_Ventricle:Liver:Spleen:GM12878:IMR90:Mesenchymal_Stem_Cell:Mesendoderm:Neural_Progenitor_Cell:Trophoblast-like_Cell:hESC	3.9e-08	rs147662640:rs9257779	11
ENSG00000197903	HIST1H2BK	6	27106073	27114619	-1	protein_coding	85236	HIST1H2BK	0.490754	-0.0430523	0	0	32	9.90696e-05	0.000333743	GTEx/v8/Adipose_Subcutaneous:GTEx/v8/Artery_Tibial	-	Yes	Adult_Cortex:Fetal_Cortex:Aorta:Bladder:Left_Ventricle:Liver:Spleen:GM12878:IMR90:Mesenchymal_Stem_Cell:Mesendoderm:Neural_Progenitor_Cell:Trophoblast-like_Cell:hESC	3.9e-08	rs147662640;rs147662640:rs9257779	11
ENSG00000198339	HIST1H4I	6	27107076	27108418	1	protein_coding	8294	HIST1H4I	0.446296	-0.468005	0	0	0	NA	NA	NA	NA	Yes	Promoter_anchored_loops:Adult_Cortex:Fetal_Cortex:Aorta:Bladder:Left_Ventricle:Liver:Spleen:GM12878:IMR90:Mesenchymal_Stem_Cell:Mesendoderm:Neural_Progenitor_Cell:Trophoblast-like_Cell:hESC	3.9e-08	rs147662640:rs9257779	11
ENSG00000184825	HIST1H2AH	6	27114861	27115317	1	protein_coding	85235	HIST1H2AH	6.29508e-05	0.19492	0	0	0	NA	NA	NA	NA	Yes	Adult_Cortex:Fetal_Cortex:Aorta:Bladder:Left_Ventricle:Liver:Spleen:GM12878:IMR90:Mesenchymal_Stem_Cell:Mesendoderm:Neural_Progenitor_Cell:Trophoblast-like_Cell:hESC	3.9e-08	rs147662640:rs9257779	11
ENSG00000112812	PRSS16	6	27215480	27224403	1	protein_coding	10279	PRSS16	2.23792e-06	0.00884812	0	0	52	3.81686e-07	6.32593e-10	GTEx/v8/Adipose_Subcutaneous:GTEx/v8/Artery_Tibial	-	Yes	Fetal_Cortex:Left_Ventricle:Liver:GM12878:IMR90:Mesenchymal_Stem_Cell:hESC	3.9e-08	rs147662640;rs147662640:rs9257779	11
ENSG00000158553	POM121L2	6	27253682	27279949	-1	protein_coding	94026	POM121L2	NA	0.313408	0	0	0	NA	NA	NA	NA	Yes	Left_Ventricle:Spleen:GM12878:IMR90:Mesenchymal_Stem_Cell:Neural_Progenitor_Cell:hESC	3.9e-08	rs147662640:rs9257779	11
ENSG00000124613	ZNF391	6	27342394	27371683	1	protein_coding	346157	ZNF391	9.25869e-07	1.23172	0	0	80	6.77474e-07	2.75877e-96	GTEx/v8/Adipose_Subcutaneous:GTEx/v8/Artery_Aorta:GTEx/v8/Artery_Tibial:GTEx/v8/Heart_Atrial_Appendage	-	Yes	IMR90:Mesenchymal_Stem_Cell	1.5e-08	rs147662640;rs147662640:rs9257779;rs147662640:rs9257779:rs9257794	11
ENSG00000096654	ZNF184	6	27418522	27440897	-1	protein_coding	7738	ZNF184	0.133749	-0.545662	0	0	0	NA	NA	NA	NA	Yes	Promoter_anchored_loops:Adult_Cortex:Fetal_Cortex:Aorta:Left_Ventricle:Liver:Spleen:GM12878:IMR90:Mesenchymal_Stem_Cell:Neural_Progenitor_Cell:Trophoblast-like_Cell:hESC	3.2e-08	rs147662640:rs9257779;rs147662640:rs9257779:rs567880264	11
ENSG00000185130	HIST1H2BL	6	27775257	27775709	-1	protein_coding	8340	HIST1H2BL	0.00286755	-0.030111	0	0	0	NA	NA	NA	NA	Yes	Adult_Cortex:Fetal_Cortex:Aorta:Liver:GM12878:IMR90:Mesenchymal_Stem_Cell:Neural_Progenitor_Cell:Trophoblast-like_Cell:hESC	3.9e-08	rs147662640:rs9257779;rs147662640	11
ENSG00000196747	HIST1H2AI	6	27775899	27776429	1	protein_coding	8329	HIST1H2AI	0.581587	-0.0583265	0	0	0	NA	NA	NA	NA	Yes	Adult_Cortex:Fetal_Cortex:Aorta:Liver:GM12878:IMR90:Mesenchymal_Stem_Cell:Neural_Progenitor_Cell:Trophoblast-like_Cell:hESC	3.9e-08	rs147662640:rs9257779;rs147662640	11
ENSG00000203813	HIST1H3H	6	27777842	27778314	1	protein_coding	8357	HIST1H3H	0.0249392	-0.177817	0	0	0	NA	NA	NA	NA	Yes	Adult_Cortex:Fetal_Cortex:Aorta:Liver:GM12878:IMR90:Mesenchymal_Stem_Cell:Neural_Progenitor_Cell:Trophoblast-like_Cell:hESC	3.9e-08	rs147662640:rs9257779;rs147662640	11
ENSG00000182611	HIST1H2AJ	6	27782112	27782607	-1	protein_coding	8331	HIST1H2AJ	0.191198	0.615054	0	0	0	NA	NA	NA	NA	Yes	Fetal_Cortex:Aorta:Liver:GM12878:IMR90:Mesenchymal_Stem_Cell:Neural_Progenitor_Cell:Trophoblast-like_Cell:hESC	3.9e-08	rs147662640:rs9257779;rs147662640	11
ENSG00000196374	HIST1H2BM	6	27782822	27783267	1	protein_coding	8342	HIST1H2BM	0.00275346	-0.27562	0	0	0	NA	NA	NA	NA	Yes	Fetal_Cortex:Aorta:Liver:GM12878:IMR90:Mesenchymal_Stem_Cell:Neural_Progenitor_Cell:Trophoblast-like_Cell:hESC	3.9e-08	rs147662640:rs9257779;rs147662640	11
ENSG00000197238	HIST1H4J	6	27791884	27792257	1	protein_coding	8363	HIST1H4J	0.423754	0.59845	0	0	0	NA	NA	NA	NA	Yes	Fetal_Cortex:Aorta:Liver:GM12878:IMR90:Mesenchymal_Stem_Cell:Neural_Progenitor_Cell:Trophoblast-like_Cell:hESC	3.9e-08	rs147662640:rs9257779;rs147662640	11
ENSG00000197914	HIST1H4K	6	27798952	27799305	-1	protein_coding	8362	HIST1H4K	0.429119	0.387416	0	0	0	NA	NA	NA	NA	Yes	Fetal_Cortex:Aorta:Liver:GM12878:IMR90:Mesenchymal_Stem_Cell:Neural_Progenitor_Cell:Trophoblast-like_Cell:hESC	3.9e-08	rs147662640:rs9257779;rs147662640	11
ENSG00000184348	HIST1H2AK	6	27805658	27806117	-1	protein_coding	8330	HIST1H2AK	0.0684285	-0.0412441	0	0	0	NA	NA	NA	NA	Yes	Adult_Cortex:Fetal_Cortex:Liver:GM12878:IMR90:Mesenchymal_Stem_Cell:Neural_Progenitor_Cell:Trophoblast-like_Cell	3.9e-08	rs147662640:rs9257779;rs147662640	11
ENSG00000233822	HIST1H2BN	6	27806323	27823487	1	protein_coding	8341	HIST1H2BN	0.139775	0.145508	0	0	179	3.08881e-06	0.00215173	GTEx/v8/Artery_Aorta	+	Yes	Adult_Cortex:Fetal_Cortex:Liver:GM12878:IMR90:Mesenchymal_Stem_Cell:Neural_Progenitor_Cell:Trophoblast-like_Cell	3.9e-08	rs147662640;rs9257779;rs147662640:rs9257779	11
ENSG00000198374	HIST1H2AL	6	27833034	27833606	1	protein_coding	8332	HIST1H2AL	0.0624869	-0.360341	0	0	0	NA	NA	NA	NA	Yes	Fetal_Cortex:Liver:GM12878:IMR90:Mesenchymal_Stem_Cell:Neural_Progenitor_Cell:Trophoblast-like_Cell	3.9e-08	rs147662640:rs9257779;rs147662640	11
ENSG00000184357	HIST1H1B	6	27834570	27835359	-1	protein_coding	3009	HIST1H1B	0.509139	-0.0898951	0	0	0	NA	NA	NA	NA	Yes	Fetal_Cortex:Liver:GM12878:IMR90:Mesenchymal_Stem_Cell:Neural_Progenitor_Cell:Trophoblast-like_Cell	3.9e-08	rs147662640:rs9257779;rs147662640	11
ENSG00000182572	HIST1H3I	6	27839623	27840099	-1	protein_coding	8354	HIST1H3I	0.36088	-0.232438	0	0	0	NA	NA	NA	NA	Yes	Fetal_Cortex:Liver:GM12878:IMR90:Mesenchymal_Stem_Cell:Neural_Progenitor_Cell:Trophoblast-like_Cell	3.2e-08	rs147662640:rs9257779;rs147662640:rs567880264:rs9257779	11
ENSG00000198558	HIST1H4L	6	27840926	27841289	-1	protein_coding	8368	HIST1H4L	0.191235	0.42689	0	0	0	NA	NA	NA	NA	Yes	Fetal_Cortex:GM12878:IMR90:Mesenchymal_Stem_Cell:Trophoblast-like_Cell	3.2e-08	rs147662640:rs9257779;rs147662640:rs567880264:rs9257779	11
ENSG00000197153	HIST1H3J	6	27858093	27860884	-1	protein_coding	8356	HIST1H3J	0.695884	-0.189708	1	4.095	0	NA	NA	NA	NA	Yes	Adult_Cortex:Fetal_Cortex:GM12878:IMR90:Mesenchymal_Stem_Cell:Trophoblast-like_Cell	3.2e-08	rs147662640;rs147662640:rs9257779;rs147662640:rs567880264:rs9257779	11
ENSG00000233224	HIST1H2AM	6	27860477	27860963	-1	protein_coding	8336	HIST1H2AM	0.000856482	-0.225135	1	4.095	0	NA	NA	NA	NA	Yes	Adult_Cortex:Fetal_Cortex:GM12878:IMR90:Mesenchymal_Stem_Cell:Trophoblast-like_Cell	3.2e-08	rs147662640;rs147662640:rs9257779;rs147662640:rs567880264:rs9257779	11
ENSG00000196331	HIST1H2BO	6	27861203	27861669	1	protein_coding	8348	HIST1H2BO	3.07278e-05	-0.223063	1	4.095	0	NA	NA	NA	NA	Yes	Adult_Cortex:Fetal_Cortex:GM12878:IMR90:Mesenchymal_Stem_Cell:Trophoblast-like_Cell	3.2e-08	rs147662640;rs147662640:rs9257779;rs147662640:rs567880264:rs9257779	11
ENSG00000168131	OR2B2	6	27878963	27880174	-1	protein_coding	81697	OR2B2	6.8672e-05	-0.212076	5	23.2	0	NA	NA	NA	NA	Yes	GM12878:IMR90:Mesenchymal_Stem_Cell:Mesendoderm:Trophoblast-like_Cell:hESC	3.2e-08	rs147662640;rs147662640:rs9257779;rs147662640:rs567880264:rs9257779	11
ENSG00000124657	OR2B6	6	27925019	27925960	1	protein_coding	26212	OR2B6	0.0407309	-0.0981731	1	0.002	0	NA	NA	NA	NA	Yes	Left_Ventricle:Liver:GM12878:IMR90:Mesenchymal_Stem_Cell:Mesendoderm:Trophoblast-like_Cell:hESC	3e-08	rs147662640;rs147662640:rs9257779;rs147662640:rs9257779:rs567880264	11
ENSG00000197279	ZNF165	6	28048753	28057341	1	protein_coding	7718	ZNF165	0.000563292	0.227981	5	5.177	306	1.60443e-06	1.94586e-12	GTEx/v8/Adipose_Visceral_Omentum:GTEx/v8/Artery_Aorta:GTEx/v8/Artery_Tibial:GTEx/v8/Heart_Left_Ventricle	+	Yes	Liver:GM12878:IMR90:Mesenchymal_Stem_Cell:Mesendoderm:Trophoblast-like_Cell:hESC	5.6e-08	rs147662640;rs9257779;rs147662640:rs9257779	11
ENSG00000196812	ZSCAN16	6	28092338	28097860	1	protein_coding	80345	ZSCAN16	2.67303e-06	0.184187	3	4.074	0	NA	NA	NA	NA	Yes	Promoter_anchored_loops:Adult_Cortex:Fetal_Cortex:Aorta:Left_Ventricle:Liver:Spleen:GM12878:IMR90:Mesenchymal_Stem_Cell:Mesendoderm:Trophoblast-like_Cell:hESC	3.9e-08	rs147662640;rs147662640:rs9257779	11
ENSG00000198315	ZKSCAN8	6	28109688	28127250	1	protein_coding	7745	ZKSCAN8	0.000231595	-0.142528	9	7.616	0	NA	NA	NA	NA	Yes	Promoter_anchored_loops:Adult_Cortex:Fetal_Cortex:Aorta:Left_Ventricle:Liver:Spleen:GM12878:IMR90:Mesenchymal_Stem_Cell:Mesendoderm:Trophoblast-like_Cell:hESC	4.2e-07	rs147662640;rs147662640:rs9257779	11
ENSG00000137185	ZSCAN9	6	28192664	28201260	1	protein_coding	7746	ZSCAN9	4.10249e-08	0.461166	5	7.251	280	0.000108097	1.5619e-05	GTEx/v8/Adipose_Subcutaneous:GTEx/v8/Artery_Aorta	-	Yes	Adult_Cortex:Fetal_Cortex:Liver:GM12878:IMR90:Mesenchymal_Stem_Cell:Mesendoderm:Trophoblast-like_Cell:hESC	3.9e-08	rs147662640;rs9257779;rs147662640:rs9257779	11
ENSG00000187626	ZKSCAN4	6	28212401	28227011	-1	protein_coding	387032	ZKSCAN4	6.74288e-05	0.661631	3	5.18	0	NA	NA	NA	NA	Yes	Adult_Cortex:Fetal_Cortex:Aorta:Left_Ventricle:Liver:Spleen:GM12878:IMR90:Mesenchymal_Stem_Cell:Mesendoderm:Trophoblast-like_Cell:hESC	3.9e-08	rs147662640;rs147662640:rs9257779	11
ENSG00000189134	NKAPL	6	28227098	28228736	1	protein_coding	222698	NKAPL	0.000165621	0.0513426	2	5.18	0	NA	NA	NA	NA	Yes	Adult_Cortex:Fetal_Cortex:Aorta:Left_Ventricle:Liver:Spleen:GM12878:IMR90:Mesenchymal_Stem_Cell:Mesendoderm:Trophoblast-like_Cell:hESC	3.9e-08	rs147662640;rs147662640:rs9257779	11
ENSG00000137338	PGBD1	6	28249314	28270326	1	protein_coding	84547	PGBD1	1.46735e-05	-0.0800605	11	14.75	0	NA	NA	NA	NA	Yes	Adult_Cortex:Fetal_Cortex:Left_Ventricle:Liver:GM12878:IMR90:Mesenchymal_Stem_Cell:Mesendoderm:Trophoblast-like_Cell:hESC	1e-05	rs147662640	11
ENSG00000235109	ZSCAN31	6	28292470	28324048	-1	protein_coding	64288	ZSCAN31	3.77127e-09	1.10713	13	13.57	241	1.12622e-10	4.37287e-25	GTEx/v8/Adipose_Subcutaneous:GTEx/v8/Adipose_Visceral_Omentum:GTEx/v8/Pancreas	-	Yes	Promoter_anchored_loops:Aorta:Left_Ventricle:Liver:Spleen:GM12878:IMR90:Mesenchymal_Stem_Cell:Mesendoderm:Trophoblast-like_Cell:hESC	3e-08	rs147662640;rs9257779	11
ENSG00000189298	ZKSCAN3	6	28317691	28336947	1	protein_coding	80317	ZKSCAN3	0.000122608	-0.652443	7	13.57	234	5.34891e-07	4.57962e-07	GTEx/v8/Adipose_Visceral_Omentum:GTEx/v8/Heart_Atrial_Appendage:GTEx/v8/Pancreas	+	Yes	Promoter_anchored_loops:Adult_Cortex:Fetal_Cortex:Aorta:Liver:GM12878:IMR90:Mesenchymal_Stem_Cell:Mesendoderm:Trophoblast-like_Cell:hESC	3e-08	rs147662640;rs9257779	11
ENSG00000158691	ZSCAN12	6	28346732	28367511	-1	protein_coding	9753	ZSCAN12	1.43992e-05	NA	11	9.552	0	NA	NA	NA	NA	Yes	Promoter_anchored_loops:Adult_Cortex:Left_Ventricle:Liver:GM12878:IMR90:Mesenchymal_Stem_Cell:Mesendoderm:Trophoblast-like_Cell:hESC	1.5e-07	rs147662640;rs147662640:rs9257779	11
ENSG00000187987	ZSCAN23	6	28399707	28411279	-1	protein_coding	222696	ZSCAN23	0.00270295	0.0706565	3	2.102	363	5.88726e-14	8.30529e-55	GTEx/v8/Adipose_Subcutaneous:GTEx/v8/Adipose_Visceral_Omentum:GTEx/v8/Artery_Aorta:GTEx/v8/Artery_Tibial:GTEx/v8/Heart_Atrial_Appendage	-	Yes	IMR90:Mesenchymal_Stem_Cell:hESC	1.5e-08	rs147662640;rs9257779;rs9257794;rs147662640:rs9257779	11
ENSG00000198704	GPX6	6	28471073	28495992	-1	protein_coding	257202	GPX6	3.13758e-05	0.718703	1	0.984	0	NA	NA	NA	NA	Yes	GM12878:IMR90:Mesenchymal_Stem_Cell:Mesendoderm:Neural_Progenitor_Cell:Trophoblast-like_Cell:hESC	3.2e-08	rs147662640;rs147662640:rs9257779;rs147662640:rs567880264:rs9257779	11
ENSG00000224586	GPX5	6	28493702	28502729	1	protein_coding	2880	GPX5	0.00888468	0.354876	0	0	0	NA	NA	NA	NA	Yes	GM12878:IMR90:Mesenchymal_Stem_Cell:Mesendoderm:Neural_Progenitor_Cell:Trophoblast-like_Cell:hESC	3.2e-08	rs147662640:rs9257779;rs147662640:rs567880264:rs9257779	11
ENSG00000232040	SCAND3	6	28539407	28583989	-1	protein_coding	114821	SCAND3	9.70724e-09	-0.785031	4	10.48	15	2.70076e-05	1.85651e-08	GTEx/v8/Artery_Aorta:GTEx/v8/Artery_Tibial	+	Yes	IMR90:Mesenchymal_Stem_Cell:Mesendoderm:hESC	5.6e-08	rs147662640;rs9257779;rs147662640:rs9257779	11
ENSG00000204713	TRIM27	6	28870779	28891766	-1	protein_coding	5987	TRIM27	0.878752	-0.142068	15	18.69	4	9.05276e-05	9.5578e-15	GTEx/v8/Adipose_Subcutaneous:GTEx/v8/Adipose_Visceral_Omentum	+	Yes	Promoter_anchored_loops:GM12878:IMR90:Trophoblast-like_Cell:hESC	3.9e-08	rs9257779;rs147662640;rs147662640:rs147662640:rs9257779	11
ENSG00000204709	C6orf100	6	28911654	28912314	1	protein_coding	729583	C6orf100	NA	NA	8	3.641	0	NA	NA	NA	NA	Yes	Promoter_anchored_loops:GM12878:IMR90:Trophoblast-like_Cell:hESC	3.9e-08	rs9257779;rs147662640;rs147662640:rs147662640:rs9257779	11
ENSG00000197935	ZNF311	6	28962562	28973093	-1	protein_coding	282890	ZNF311	0.000129446	0.377858	9	11.6	4	7.83821e-05	1.05129e-10	GTEx/v8/Artery_Tibial	+	Yes	Aorta:Left_Ventricle:Liver:Pancreas:Spleen:GM12878:IMR90:Mesenchymal_Stem_Cell:Mesendoderm:Neural_Progenitor_Cell:Trophoblast-like_Cell:hESC	1.5e-08	rs9257779;rs147662640;rs147662640:rs9257779:rs147662640:rs567880264:rs9257794	11
ENSG00000204704	OR2W1	6	29011990	29013017	-1	protein_coding	26692	OR2W1	0.0865619	0.531528	7	6.576	0	NA	NA	NA	NA	Yes	Mesenchymal_Stem_Cell:Mesendoderm	1.5e-07	rs9257779;rs147662640;rs147662640:rs9257779	11
ENSG00000204703	OR2B3	6	29053985	29055090	-1	protein_coding	442184	OR2B3	0.00133693	0.45884	3	9.377	0	NA	NA	NA	NA	Yes	IMR90:Mesenchymal_Stem_Cell:Mesendoderm:hESC	3e-08	rs9257779;rs147662640;rs147662640:rs9257779	11
ENSG00000204702	OR2J1	6	29068386	29069658	1	protein_coding	442185	OR2J1	0.0174945	NA	1	0.549	0	NA	NA	NA	NA	Yes	Promoter_anchored_loops:IMR90:Mesenchymal_Stem_Cell:Mesendoderm:hESC	3e-08	rs9257779;rs147662640;rs147662640:rs9257779	11
ENSG00000204701	OR2J3	6	29079668	29080603	1	protein_coding	442186	OR2J3	0.0281435	0.112859	2	1.351	0	NA	NA	NA	NA	Yes	Left_Ventricle:IMR90:Mesenchymal_Stem_Cell:Mesendoderm:hESC	3e-08	rs9257779;rs147662640;rs147662640:rs9257779	11
ENSG00000204700	OR2J2	6	29141311	29142351	1	protein_coding	26707	OR2J2	0.0107267	0.271259	3	5.147	0	NA	NA	NA	NA	Yes	Mesendoderm	1.5e-07	rs9257779;rs147662640;rs147662640:rs9257779	11
ENSG00000204695	OR14J1	6	29274403	29275519	1	protein_coding	442191	OR14J1	8.02406e-08	1.33547	4	10.49	0	NA	NA	NA	NA	Yes	Left_Ventricle:IMR90:Mesenchymal_Stem_Cell:Mesendoderm:Trophoblast-like_Cell:hESC	3e-08	rs9257779;rs147662640;rs147662640:rs9257779:rs147662640	11
ENSG00000243729	OR5V1	6	29323007	29399744	-1	protein_coding	81696	OR5V1	0.00344262	0.323635	13	11.39	0	NA	NA	NA	NA	Yes	Mesendoderm:hESC	1.5e-08	rs9257779;rs9257794;rs147662640;rs147662640:rs147662640	11
ENSG00000112462	OR12D3	6	29341200	29343068	-1	protein_coding	81797	OR12D3	1.34136e-05	0.883549	5	11.39	0	NA	NA	NA	NA	Yes	Mesenchymal_Stem_Cell:Mesendoderm:Trophoblast-like_Cell:hESC	1.5e-08	rs9257794;rs9257779;rs147662640;rs147662640:rs9257779	11
ENSG00000168787	OR12D2	6	29364416	29365448	1	protein_coding	26529	OR12D2	0.601033	0.457835	3	6.779	0	NA	NA	NA	NA	Yes	Promoter_anchored_loops:Mesendoderm:hESC	1.5e-07	rs9257779;rs147662640;rs147662640:rs9257779	11
ENSG00000204694	OR11A1	6	29393281	29424848	-1	protein_coding	26531	OR11A1	0.0434844	1.23026	4	3.951	0	NA	NA	NA	NA	Yes	Spleen:Mesendoderm:hESC	1.5e-07	rs9257779;rs147662640;rs147662640:rs147662640	11
ENSG00000206474	OR10C1	6	29407083	29408731	1	protein_coding	442194	OR10C1	0.227592	0.363897	3	1.81	0	NA	NA	NA	NA	Yes	Spleen:Mesendoderm:hESC	1.5e-07	rs9257779;rs147662640;rs147662640:rs147662640	11
ENSG00000204688	OR2H1	6	29424958	29432105	1	protein_coding	26716	OR2H1	0.0449041	-0.358288	4	3.951	0	NA	NA	NA	NA	Yes	Spleen:Mesendoderm:hESC	1.5e-07	rs9257779;rs147662640;rs147662640:rs147662640	11
ENSG00000204687	MAS1L	6	29454474	29455738	-1	protein_coding	116511	MAS1L	0.000466206	0.689548	5	8.385	0	NA	NA	NA	NA	Yes	Aorta:Liver:Pancreas:Spleen:IMR90:Mesenchymal_Stem_Cell:Mesendoderm:Trophoblast-like_Cell:hESC	1.5e-08	rs9257779;rs147662640;rs147662640:rs9257779;rs147662640:rs9257779:rs9257794	11
ENSG00000213886	UBD	6	29523292	29527702	-1	protein_coding	10537	UBD	0.0798958	0.401531	4	14.02	0	NA	NA	NA	NA	Yes	Promoter_anchored_loops:Adult_Cortex:Left_Ventricle:Liver:IMR90:Mesenchymal_Stem_Cell:Mesendoderm:Trophoblast-like_Cell:hESC	1.5e-08	rs9257779;rs147662640;rs147662640:rs9257779:rs147662640:rs567880264:rs9257794	11
ENSG00000204681	GABBR1	6	29523406	29601753	-1	protein_coding	2550	GABBR1	0.99997	0.238892	7	14.02	0	NA	NA	NA	NA	Yes	Promoter_anchored_loops	1.5e-07	rs9257779;rs147662640;rs147662640:rs9257779	11
ENSG00000204657	OR2H2	6	29555683	29556745	1	protein_coding	7932	OR2H2	0.0899459	0.696836	2	2.181	282	1.16286e-09	1.93261e-11	GTEx/v8/Adipose_Visceral_Omentum:GTEx/v8/Heart_Atrial_Appendage:GTEx/v8/Heart_Left_Ventricle	-	Yes	Promoter_anchored_loops:Adult_Cortex:Left_Ventricle:Liver:IMR90:Mesenchymal_Stem_Cell:Mesendoderm:Trophoblast-like_Cell:hESC	1.5e-08	rs147662640;rs9257779;rs9257779:rs147662640:rs9257779;rs147662640:rs567880264:rs9257794	11
ENSG00000112514	CUTA	6	33384219	33386094	-1	protein_coding	51596	CUTA	1.14218e-05	-0.619996	0	0	0	NA	NA	NA	NA	Yes	Adult_Cortex:Fetal_Cortex	1.2e-05	rs570810419	12
ENSG00000197283	SYNGAP1	6	33387847	33421466	1	protein_coding	8831	SYNGAP1	0.999998	-1.10912	0	0	0	NA	NA	NA	NA	Yes	Adult_Cortex:Fetal_Cortex	1.2e-05	rs570810419	12
ENSG00000204188	GGNBP1	6	33551515	33556803	1	protein_coding	449520	GGNBP1	NA	NA	0	0	0	NA	NA	NA	NA	Yes	Promoter_anchored_loops:Adult_Cortex	9.9e-06	rs570810419	12
ENSG00000137288	UQCC2	6	33662070	33679504	-1	protein_coding	84300	UQCC2	0.0595477	0.254208	0	0	0	NA	NA	NA	NA	Yes	Adult_Cortex:Fetal_Cortex	1.2e-05	rs570810419	12
ENSG00000269490	SBP1	6	33663196	33663474	-1	protein_coding	NA	NA	0.00238547	NA	0	0	0	NA	NA	NA	NA	Yes	Promoter_anchored_loops	3.3e-08	rs570810419	12
ENSG00000161896	IP6K3	6	33689444	33714762	-1	protein_coding	117283	IP6K3	0.0485339	1.72324	0	0	0	NA	NA	NA	NA	Yes	Adult_Cortex:IMR90	3.3e-08	rs570810419	12
ENSG00000161904	LEMD2	6	33738979	33756913	-1	protein_coding	221496	LEMD2	0.302373	0.39292	0	0	0	NA	NA	NA	NA	Yes	Promoter_anchored_loops	3.9e-06	rs570810419	12
ENSG00000124493	GRM4	6	33989628	34123399	-1	protein_coding	2914	GRM4	0.97935	-0.635219	0	0	0	NA	NA	NA	NA	Yes	Adult_Cortex:Fetal_Cortex:GM12878:IMR90:Mesenchymal_Stem_Cell	3.3e-08	rs570810419	12
ENSG00000137309	HMGA1	6	34204650	34214008	1	protein_coding	3159	HMGA1	0.7243	-0.910116	0	0	0	NA	NA	NA	NA	Yes	Promoter_anchored_loops	8.6e-06	rs570810419	12
ENSG00000186577	C6orf1	6	34214157	34217247	-1	protein_coding	221491	C6orf1	0.298719	-0.834304	0	0	0	NA	NA	NA	NA	Yes	Promoter_anchored_loops:Adult_Cortex:Fetal_Cortex	3.9e-06	rs570810419	12
ENSG00000272325	NUDT3	6	34247456	34360451	-1	protein_coding	11165	NUDT3	0.876817	0.134938	163	15.89	147	4.46039e-07	0.000188858	GTEx/v8/Adipose_Subcutaneous:GTEx/v8/Artery_Tibial	-	Yes	Promoter_anchored_loops:Adult_Cortex:Fetal_Cortex:Hippocampus:Left_Ventricle:Liver:Right_Ventricle:Spleen:GM12878:IMR90:Mesenchymal_Stem_Cell:Mesendoderm:Trophoblast-like_Cell:hESC	3.3e-08	rs570810419	12
ENSG00000270800	RPS10-NUDT3	6	34256547	34393825	-1	protein_coding	100529239	RPS10-NUDT3	NA	NA	164	15.89	0	NA	NA	NA	NA	Yes	Promoter_anchored_loops:Liver:GM12878:IMR90:Mesenchymal_Stem_Cell:Mesendoderm:hESC	3.3e-08	rs570810419	12
ENSG00000124614	RPS10	6	34385231	34393902	-1	protein_coding	6204	RPS10	0.946463	0.204718	3	8.962	154	1.13903e-11	2.19842e-09	GTEx/v8/Adipose_Visceral_Omentum:GTEx/v8/Artery_Aorta:GTEx/v8/Artery_Coronary:GTEx/v8/Artery_Tibial	+	Yes	Promoter_anchored_loops:Liver:GM12878:IMR90:Mesenchymal_Stem_Cell:Mesendoderm:hESC	3.3e-08	rs570810419	12
ENSG00000124507	PACSIN1	6	34433916	34503006	1	protein_coding	29993	PACSIN1	0.991339	-1.5939	0	0	0	NA	NA	NA	NA	Yes	IMR90:Mesenchymal_Stem_Cell	3.3e-08	rs570810419	12
ENSG00000124664	SPDEF	6	34505579	34524110	-1	protein_coding	25803	SPDEF	0.711825	-0.40704	0	0	0	NA	NA	NA	NA	Yes	IMR90:Mesenchymal_Stem_Cell	3.3e-08	rs570810419	12
ENSG00000196821	C6orf106	6	34555065	34664636	-1	protein_coding	64771	C6orf106	0.45403	-1.13555	0	0	0	NA	NA	NA	NA	Yes	GM12878	3.3e-08	rs570810419	12
ENSG00000124562	SNRPC	6	34725183	34741571	1	protein_coding	6631	SNRPC	0.727262	-0.35112	0	0	0	NA	NA	NA	NA	Yes	Adult_Cortex	1.2e-05	rs570810419	12
ENSG00000065060	UHRF1BP1	6	34759857	34850915	1	protein_coding	54887	UHRF1BP1	2.46541e-07	-0.830354	0	0	0	NA	NA	NA	NA	Yes	Adult_Cortex:IMR90:Mesenchymal_Stem_Cell	3.3e-08	rs570810419	12
ENSG00000064995	TAF11	6	34845555	34855866	-1	protein_coding	6882	TAF11	0.875432	-0.232569	0	0	0	NA	NA	NA	NA	Yes	Fetal_Cortex:GM12878:IMR90:Mesenchymal_Stem_Cell:hESC	3.3e-08	rs570810419	12
ENSG00000064999	ANKS1A	6	34857042	35059179	1	protein_coding	23294	ANKS1A	0.84686	0.260683	0	0	0	NA	NA	NA	NA	Yes	Fetal_Cortex:GM12878:IMR90:Mesenchymal_Stem_Cell:hESC	3.3e-08	rs570810419	12
ENSG00000124678	TCP11	6	35085848	35116387	-1	protein_coding	6954	TCP11	4.00945e-05	-0.413536	0	0	0	NA	NA	NA	NA	Yes	Left_Ventricle:Liver:Spleen:GM12878:IMR90:Mesenchymal_Stem_Cell:Mesendoderm:Trophoblast-like_Cell	3.3e-08	rs570810419	12
ENSG00000146197	SCUBE3	6	35182190	35220856	1	protein_coding	222663	SCUBE3	0.999984	-0.692415	0	0	0	NA	NA	NA	NA	Yes	Adult_Cortex:Fetal_Cortex:Left_Ventricle:GM12878:IMR90:Mesenchymal_Stem_Cell:hESC	3.3e-08	rs570810419	12
ENSG00000112033	PPARD	6	35310335	35395968	1	protein_coding	5467	PPARD	0.966868	0.253949	0	0	0	NA	NA	NA	NA	Yes	GM12878	3.3e-08	rs570810419	12
ENSG00000096060	FKBP5	6	35541362	35696360	-1	protein_coding	2289	FKBP5	0.498849	-0.767039	0	0	0	NA	NA	NA	NA	Yes	Adult_Cortex	1.2e-05	rs570810419	12
ENSG00000130363	RSPH3	6	159393903	159421219	-1	protein_coding	83861	RSPH3	0.00139623	-0.228791	0	0	0	NA	NA	NA	NA	Yes	IMR90:Mesenchymal_Stem_Cell	1.8e-09	rs6925867	13
ENSG00000164694	FNDC1	6	159590429	159693141	1	protein_coding	84624	FNDC1	3.07461e-07	NA	0	0	0	NA	NA	NA	NA	Yes	IMR90:Mesenchymal_Stem_Cell:hESC	5.2e-16	rs6925867:rs9457827:rs9295128;rs117733303:rs117733303:rs9295128	13
ENSG00000112096	SOD2	6	160090089	160183561	-1	protein_coding	6648	SOD2	0.237155	1.73793	0	0	0	NA	NA	NA	NA	Yes	Liver:GM12878:IMR90:Mesenchymal_Stem_Cell:Mesendoderm:Trophoblast-like_Cell:hESC	1.4e-14	rs6925867:rs9457827:rs117733303	13
ENSG00000146457	WTAP	6	160146617	160177351	1	protein_coding	9589	WTAP	0.995577	1.74577	0	0	0	NA	NA	NA	NA	Yes	Left_Ventricle:Liver:GM12878:IMR90:Mesenchymal_Stem_Cell:Trophoblast-like_Cell:hESC	1.3e-10	rs6925867:rs9457827	13
ENSG00000120437	ACAT2	6	160181360	160200144	1	protein_coding	39	ACAT2	1.26454e-05	0.731905	0	0	0	NA	NA	NA	NA	Yes	Liver:GM12878:IMR90:Mesenchymal_Stem_Cell:Mesendoderm:Trophoblast-like_Cell:hESC	1.4e-14	rs6925867:rs9457827:rs117733303	13
ENSG00000120438	TCP1	6	160199530	160210781	-1	protein_coding	6950	TCP1	0.989086	0.1579	0	0	0	NA	NA	NA	NA	Yes	Left_Ventricle:Liver:GM12878:IMR90:Mesenchymal_Stem_Cell:Mesendoderm:Trophoblast-like_Cell:hESC	5.2e-16	rs6925867:rs9295128;rs117733303:rs9457827:rs117733303:rs9295128	13
ENSG00000112110	MRPL18	6	160210844	160219468	1	protein_coding	29074	MRPL18	0.000794103	1.58163	0	0	0	NA	NA	NA	NA	Yes	Left_Ventricle:Liver:GM12878:IMR90:Mesenchymal_Stem_Cell:Mesendoderm:Trophoblast-like_Cell:hESC	5.2e-16	rs6925867:rs9295128;rs117733303:rs9457827:rs117733303:rs9295128	13
ENSG00000146453	PNLDC1	6	160221298	160241736	1	protein_coding	154197	PNLDC1	2.54478e-08	0.0542436	0	0	0	NA	NA	NA	NA	Yes	Left_Ventricle:Liver:GM12878:IMR90:Mesenchymal_Stem_Cell:Mesendoderm:Trophoblast-like_Cell:hESC	5.2e-16	rs6925867:rs9295128;rs117733303:rs9457827:rs117733303:rs9295128	13
ENSG00000130368	MAS1	6	160327974	160329108	1	protein_coding	4142	MAS1	0.000870823	-0.186942	0	0	0	NA	NA	NA	NA	Yes	Left_Ventricle:Liver:Spleen:GM12878:IMR90:Mesenchymal_Stem_Cell:Mesendoderm:Trophoblast-like_Cell:hESC	7.2e-17	rs6925867:rs9457827:rs9295128;rs117733303:rs117733303:rs10455872	13
ENSG00000197081	IGF2R	6	160390131	160534539	1	protein_coding	3482	IGF2R	0.999999	-0.31206	27	8.367	0	NA	NA	NA	NA	Yes	Adult_Cortex:Fetal_Cortex:Aorta:Dorsolateral_Prefrontal_Cortex:Left_Ventricle:Liver:Pancreas:Right_Ventricle:Spleen:GM12878:IMR90:Mesenchymal_Stem_Cell:Mesendoderm:Neural_Progenitor_Cell:Trophoblast-like_Cell:hESC	7.2e-17	rs6925867;rs9457827;rs6925867:rs9457827:rs117733303:rs9295128;rs117733303:rs9295128:rs10455872	13
ENSG00000175003	SLC22A1	6	160542821	160579750	1	protein_coding	6580	SLC22A1	1.23978e-13	-0.158084	2	5.481	25	5.41977e-14	3.85687e-11	GTEx/v8/Adipose_Subcutaneous:GTEx/v8/Adipose_Visceral_Omentum:GTEx/v8/Artery_Aorta:GTEx/v8/Artery_Tibial:GTEx/v8/Heart_Atrial_Appendage	+	Yes	Aorta:Left_Ventricle:Liver:Pancreas:Spleen:IMR90:Mesenchymal_Stem_Cell:Mesendoderm:Trophoblast-like_Cell:hESC	6.5e-17	rs6925867;rs9457827;rs9295128:rs9295128;rs117733303:rs6925867:rs117733303:rs9457827:rs16891156:rs10455872	13
ENSG00000112499	SLC22A2	6	160592093	160698670	-1	protein_coding	6582	SLC22A2	1.41917e-09	0.905296	3	2.542	0	NA	NA	NA	NA	Yes	Liver:IMR90:Mesenchymal_Stem_Cell:Mesendoderm:Trophoblast-like_Cell:hESC	5.2e-16	rs16891156;rs9295128;rs6925867:rs9295128;rs117733303:rs9295128:rs16891156	13
ENSG00000146477	SLC22A3	6	160769300	160876014	1	protein_coding	6581	SLC22A3	3.31639e-05	0.310629	2	0.392	0	NA	NA	NA	NA	Yes	Aorta:Left_Ventricle:Liver:Pancreas:Psoas:Right_Ventricle:Spleen:IMR90:Mesenchymal_Stem_Cell:Mesendoderm:Trophoblast-like_Cell:hESC	5.2e-16	rs9295128;rs117733303;rs6925867:rs9295128;rs117733303:rs16891156:rs9295128:rs9457827:rs117733303	13
ENSG00000198670	LPA	6	160952515	161087407	-1	protein_coding	4018	LPA	2.44223e-32	0.0421444	5	5.891	5	5.73213e-08	0.000104571	GTEx/v8/Liver	-	No	NA	6.5e-17	rs10455872;rs56393506;rs9295128;rs117733303	13
ENSG00000122194	PLG	6	161123270	161174347	1	protein_coding	5340	PLG	0.00243512	0.479258	1	0.699	0	NA	NA	NA	NA	Yes	IMR90:Mesendoderm	3.8e-13	rs10455872;rs9295128;rs117733303:rs76483627	13
ENSG00000085511	MAP3K4	6	161412759	161538417	1	protein_coding	4216	MAP3K4	0.999992	NA	0	0	0	NA	NA	NA	NA	Yes	Mesendoderm	9.8e-09	rs76483627	13
ENSG00000026652	AGPAT4	6	161551011	161695093	-1	protein_coding	56895	AGPAT4	0.6745	0.748253	0	0	0	NA	NA	NA	NA	Yes	IMR90:Mesenchymal_Stem_Cell:Mesendoderm:hESC	9.4e-12	rs76483627:rs10455872	13
ENSG00000185345	PARK2	6	161768452	163148803	-1	protein_coding	5071	PARK2	0.0218088	0.549835	0	0	0	NA	NA	NA	NA	Yes	IMR90:Mesenchymal_Stem_Cell	6.5e-17	rs9295128:rs9295128;rs117733303:rs76483627:rs6925867:rs117733303:rs10455872	13
ENSG00000112530	PACRG	6	163148164	163736524	1	protein_coding	135138	PACRG	0.000104677	0.454746	0	0	0	NA	NA	NA	NA	Yes	IMR90:Mesenchymal_Stem_Cell	6.5e-17	rs9295128:rs9295128;rs117733303:rs76483627:rs6925867:rs117733303:rs10455872	13
ENSG00000225683	AL078585.1	6	163586446	163612840	-1	protein_coding	NA	NA	NA	NA	0	0	0	NA	NA	NA	NA	Yes	IMR90:Mesenchymal_Stem_Cell	9.4e-12	rs10455872:rs76483627	13
ENSG00000112531	QKI	6	163835032	163999628	1	protein_coding	9444	QKI	0.963163	-0.183477	0	0	0	NA	NA	NA	NA	Yes	IMR90:Mesenchymal_Stem_Cell	6.5e-17	rs10455872:rs76483627	13
ENSG00000153790	C7orf31	7	25174316	25219975	-1	protein_coding	136895	C7orf31	7.44109e-08	0.0581809	0	0	0	NA	NA	NA	NA	Yes	Adult_Cortex:Mesenchymal_Stem_Cell:Trophoblast-like_Cell	2.9e-07	7:25942812_ACT_A	14
ENSG00000105954	NPVF	7	25264189	25268105	-1	protein_coding	64111	NPVF	0.00264028	0.806255	0	0	0	NA	NA	NA	NA	Yes	GM12878:IMR90:Mesenchymal_Stem_Cell:Mesendoderm:Trophoblast-like_Cell:hESC	1e-10	7:25942812_ACT_A:rs4000713	14
ENSG00000050344	NFE2L3	7	26191860	26226745	1	protein_coding	9603	NFE2L3	1.09962e-07	0.0330697	0	0	0	NA	NA	NA	NA	Yes	Adult_Cortex:Fetal_Cortex:GM12878:IMR90:Mesenchymal_Stem_Cell:Mesendoderm:hESC	1e-10	7:25942812_ACT_A:rs4000713	14
ENSG00000122566	HNRNPA2B1	7	26229547	26241149	-1	protein_coding	3181	HNRNPA2B1	0.970043	-1.6983	0	0	0	NA	NA	NA	NA	Yes	GM12878	1e-10	rs4000713;7:25942812_ACT_A:7:25942812_ACT_A:rs4000713	14
ENSG00000122565	CBX3	7	26240782	26252976	1	protein_coding	11335	CBX3	0.6332	0.0968101	0	0	0	NA	NA	NA	NA	Yes	GM12878	1e-10	rs4000713;7:25942812_ACT_A:7:25942812_ACT_A:rs4000713	14
ENSG00000086300	SNX10	7	26331541	26413949	1	protein_coding	29887	SNX10	0.00585751	-0.279272	0	0	0	NA	NA	NA	NA	Yes	Left_Ventricle:Liver:GM12878:IMR90:Mesenchymal_Stem_Cell:Mesendoderm:Trophoblast-like_Cell:hESC	1e-10	7:25942812_ACT_A:rs4000713	14
ENSG00000122548	KIAA0087	7	26572740	26578407	-1	protein_coding	9808	KIAA0087	NA	NA	0	0	0	NA	NA	NA	NA	Yes	IMR90:Mesenchymal_Stem_Cell:Mesendoderm:Trophoblast-like_Cell:hESC	1e-10	7:25942812_ACT_A:rs4000713	14
ENSG00000222004	C7orf71	7	26677490	26686889	1	protein_coding	285941	C7orf71	NA	-0.749781	0	0	0	NA	NA	NA	NA	Yes	IMR90:Mesenchymal_Stem_Cell:Mesendoderm:hESC	1e-10	7:25942812_ACT_A:rs4000713	14
ENSG00000005020	SKAP2	7	26706681	27034858	-1	protein_coding	8935	SKAP2	0.909797	-0.604967	0	0	0	NA	NA	NA	NA	Yes	IMR90:Mesenchymal_Stem_Cell:Mesendoderm:Trophoblast-like_Cell:hESC	1e-10	7:25942812_ACT_A:rs4000713	14
ENSG00000105991	HOXA1	7	27132612	27135615	-1	protein_coding	3198	HOXA1	0.0849874	-0.680057	0	0	0	NA	NA	NA	NA	Yes	IMR90:Mesenchymal_Stem_Cell:Mesendoderm:Trophoblast-like_Cell:hESC	1e-10	7:25942812_ACT_A:rs4000713	14
ENSG00000105996	HOXA2	7	27139721	27142430	-1	protein_coding	3199	HOXA2	0.278338	-0.425114	0	0	0	NA	NA	NA	NA	Yes	IMR90:Mesenchymal_Stem_Cell:Mesendoderm:Trophoblast-like_Cell:hESC	1e-10	7:25942812_ACT_A:rs4000713	14
ENSG00000105997	HOXA3	7	27145803	27192200	-1	protein_coding	3200	HOXA3	0.931754	-0.602348	0	0	0	NA	NA	NA	NA	Yes	Aorta:Left_Ventricle:Liver:Spleen:GM12878:IMR90:Mesenchymal_Stem_Cell:Mesendoderm:Neural_Progenitor_Cell:Trophoblast-like_Cell:hESC	1e-10	7:25942812_ACT_A:rs4000713	14
ENSG00000197576	HOXA4	7	27168126	27170418	-1	protein_coding	3201	HOXA4	0.00942667	0.361772	0	0	0	NA	NA	NA	NA	Yes	Fetal_Cortex:Aorta:Left_Ventricle:Liver:Spleen:GM12878:IMR90:Mesenchymal_Stem_Cell:Mesendoderm:Neural_Progenitor_Cell:Trophoblast-like_Cell:hESC	1e-10	7:25942812_ACT_A:rs4000713	14
ENSG00000106004	HOXA5	7	27180671	27183287	-1	protein_coding	3202	HOXA5	0.796213	0.0984031	0	0	0	NA	NA	NA	NA	Yes	Fetal_Cortex:Aorta:Left_Ventricle:Liver:Spleen:GM12878:IMR90:Mesenchymal_Stem_Cell:Mesendoderm:Neural_Progenitor_Cell:Trophoblast-like_Cell:hESC	1e-10	7:25942812_ACT_A:rs4000713	14
ENSG00000106006	HOXA6	7	27185015	27190222	-1	protein_coding	3203	HOXA6	1.80043e-05	NA	0	0	0	NA	NA	NA	NA	Yes	Fetal_Cortex:Aorta:Left_Ventricle:Liver:Spleen:GM12878:IMR90:Mesenchymal_Stem_Cell:Mesendoderm:Neural_Progenitor_Cell:Trophoblast-like_Cell:hESC	1e-10	7:25942812_ACT_A:rs4000713	14
ENSG00000122592	HOXA7	7	27193335	27197555	-1	protein_coding	3204	HOXA7	0.00316907	-0.435657	0	0	0	NA	NA	NA	NA	Yes	Aorta:Left_Ventricle:Liver:Spleen:GM12878:IMR90:Mesenchymal_Stem_Cell:Mesendoderm:Neural_Progenitor_Cell:Trophoblast-like_Cell:hESC	1e-10	7:25942812_ACT_A:rs4000713	14
ENSG00000078399	HOXA9	7	27202054	27210117	-1	protein_coding	3205	HOXA9	0.000100013	-0.353761	0	0	0	NA	NA	NA	NA	Yes	Dorsolateral_Prefrontal_Cortex:Left_Ventricle:Liver:Pancreas:Spleen:GM12878:IMR90:Mesenchymal_Stem_Cell:Mesendoderm:Neural_Progenitor_Cell:Trophoblast-like_Cell:hESC	1e-10	7:25942812_ACT_A:rs4000713	14
ENSG00000257184	RP1-170O19.20	7	27203154	27219632	-1	protein_coding	NA	NA	NA	NA	0	0	0	NA	NA	NA	NA	Yes	Dorsolateral_Prefrontal_Cortex:Left_Ventricle:Liver:Pancreas:Spleen:GM12878:IMR90:Mesenchymal_Stem_Cell:Mesendoderm:Neural_Progenitor_Cell:Trophoblast-like_Cell:hESC	1e-10	7:25942812_ACT_A:rs4000713	14
ENSG00000253293	HOXA10	7	27210210	27219880	-1	protein_coding	3206	HOXA10	0.678435	-0.871031	0	0	0	NA	NA	NA	NA	Yes	Dorsolateral_Prefrontal_Cortex:Left_Ventricle:Liver:Pancreas:Spleen:GM12878:IMR90:Mesenchymal_Stem_Cell:Mesendoderm:Neural_Progenitor_Cell:Trophoblast-like_Cell:hESC	1e-10	7:25942812_ACT_A:rs4000713	14
ENSG00000005073	HOXA11	7	27221129	27224842	-1	protein_coding	3207	HOXA11	0.863825	0.401702	0	0	0	NA	NA	NA	NA	Yes	Dorsolateral_Prefrontal_Cortex:Left_Ventricle:Liver:Pancreas:Spleen:GM12878:IMR90:Mesenchymal_Stem_Cell:Mesendoderm:Neural_Progenitor_Cell:Trophoblast-like_Cell:hESC	1e-10	7:25942812_ACT_A:rs4000713	14
ENSG00000106031	HOXA13	7	27233122	27239725	-1	protein_coding	3209	HOXA13	NA	-0.418411	0	0	0	NA	NA	NA	NA	Yes	Dorsolateral_Prefrontal_Cortex:Left_Ventricle:Liver:Pancreas:Spleen:GM12878:IMR90:Mesenchymal_Stem_Cell:Mesendoderm:Neural_Progenitor_Cell:Trophoblast-like_Cell:hESC	1e-10	7:25942812_ACT_A:rs4000713	14
ENSG00000106038	EVX1	7	27282164	27290112	1	protein_coding	2128	EVX1	2.93029e-05	-0.887444	0	0	0	NA	NA	NA	NA	Yes	Spleen:IMR90:Mesenchymal_Stem_Cell	1e-10	7:25942812_ACT_A:rs4000713	14
ENSG00000106052	TAX1BP1	7	27778950	27884183	1	protein_coding	8887	TAX1BP1	2.99233e-06	0.359415	0	0	0	NA	NA	NA	NA	Yes	IMR90:Mesendoderm:Trophoblast-like_Cell	1e-10	7:25942812_ACT_A:rs4000713	14
ENSG00000153814	JAZF1	7	27870192	28220362	-1	protein_coding	221895	JAZF1	0.958302	-0.943258	0	0	0	NA	NA	NA	NA	Yes	IMR90	2.9e-07	7:25942812_ACT_A	14
ENSG00000136271	DDX56	7	44605016	44614650	-1	protein_coding	54606	DDX56	3.51574e-06	-0.60494	0	0	0	NA	NA	NA	NA	Yes	GM12878:IMR90:Mesenchymal_Stem_Cell	3.7e-07	rs73109460	15
ENSG00000158604	TMED4	7	44617493	44621886	-1	protein_coding	222068	TMED4	0.292928	0.480385	0	0	0	NA	NA	NA	NA	Yes	GM12878:IMR90:Mesenchymal_Stem_Cell	3.7e-07	rs73109460	15
ENSG00000105953	OGDH	7	44646171	44748665	1	protein_coding	4967	OGDH	0.993695	-0.0701961	0	0	0	NA	NA	NA	NA	Yes	Promoter_anchored_loops:GM12878:IMR90:Mesenchymal_Stem_Cell	1.9e-08	rs73109460	15
ENSG00000122515	ZMIZ2	7	44788180	44809477	1	protein_coding	83637	ZMIZ2	0.99962	0.416826	17	8.079	19	3.30135e-13	8.21167e-09	GTEx/v8/Adipose_Subcutaneous:GTEx/v8/Adipose_Visceral_Omentum:GTEx/v8/Pancreas	+	No	NA	1.9e-08	rs73109460	15
ENSG00000196262	PPIA	7	44836279	44864163	1	protein_coding	5478	PPIA	0.808049	0.430905	0	0	12	1.56786e-05	2.29167e-05	GTEx/v8/Pancreas	+	Yes	Promoter_anchored_loops:Adult_Cortex:Fetal_Cortex	1.9e-08	rs73109460	15
ENSG00000146676	PURB	7	44915896	44924960	-1	protein_coding	5814	PURB	0.605935	-2.57194	0	0	0	NA	NA	NA	NA	Yes	Adult_Cortex:Fetal_Cortex	1.9e-08	rs73109460	15
[truncated: 485 more rows]

## Sheet: ST4C
ensg	symbol	chr	start	end	strand	type	entrezID	HUGO	pLI	ncRVIS	posMapSNPs	posMapMaxCADD	eqtlMapSNPs	eqtlMapminP	eqtlMapminQ	eqtlMapts	eqtlDirection	ciMap	ciMapts	minGwasP	IndSigSNPs	GenomicLocus
[truncated: 1,126 more rows]

[truncated: 15 more sheets: ST4D, ST5A, ST5B, ST5C, ST5D, ST6A, ST6B, ST6C, ST6D, ST7, ST8, ST9, ST10, ST11, ST12]
